# Supplementary material for: A systems genetics approach reveals environment-dependent associations between SNPs, protein coexpression, and drought-related traits in maize
Source: HighWire-hosted journal article supplement (doi:10.1101/gr.255224.119), 2020-10-15
Supplement: Supplemental_tables.xlsx [file Supplemental_tables.xlsx]

## Sheet: sup. Table S1
Supplemental Table S1. Results of ANOVA. Abundance changes are significant when adjusted P-value < 0.05 and fold change > 1.5 or < 0.66.
Proteins are ordered according to the WD/WW ratio of the genotype showing the highest fold change in response to water deficit (max WD/WW ratio).
Very high and very low max WD/WW ratios were obtained for proteins quantified by spectral counting due to zero or near-zero values at the denominatior or at the numerator, respectively. ND mean that denominator had a 0 value.
* protein ID corresponding to several isoforms or gene accessions
Protein set	Protein ID	Accession	v4 Gene model	Description	KEGG annotation	Max WD/WW ratio	Max fold change between genotypes	P-value for condition effect	Adjusted P-value for condition effect	P-value for genotype effect	Adjusted P-value for genotype effect	P-value for GxE interaction	Adjusted P-value for GxE interaction
SC	d1948.a1	GRMZM2G346839_P01	Zm00001d025508	weakly similar to ( 176) AT4G10250 | Symbols: ATHSP22.0 | ATHSP22.0 | chr4:6370537-6371124 FORWARDweakly similar to ( 185) HSP41_SOYBN 22.0 kDa class IV heat shock protein precursor - Glycine max (Soybean)moderately similar to ( 227) loc_os04g36750 12004.m08715 protein 22.0 kDa class IV heat shock protein precursor, putative, expressed seq=cds; coord=10:119759011..119760065:1; parent_gene=GRMZM2G…	Folding, sorting and degradation	ND	504.689	0.0390405	0.0515144	0.316901	0.44473	0.970073	1
SC	d2020.a1	GRMZM2G166245_P02	Zm00001d005161	highly similar to ( 507) AT2G21370 | Symbols: | xylulose kinase, putative | chr2:9137582-9139573 REVERSEmoderately similar to ( 391) loc_os07g22650 12007.m06549 protein xylulokinase, putative, expressed seq=cds; coord=2:157236115..157238655:1; parent_gene=GRMZM2G166245	Carbohydrate metabolism	3.94387e+32	319.689	0.92316	0.933514	0.000503294	0.00246409	1	1
SC	d1538.a1	GRMZM2G017229_P01	NA	very weakly similar to (83.6) AT2G22795 | Symbols: | unknown protein | chr2:9697380-9699584 REVERSEweakly similar to ( 196) loc_os02g03840 12002.m05733 protein expressed protein seq=cds; coord=5:74642485..74645616:-1; parent_gene=GRMZM2G017229	notassigned	9.35011e+31	9.88207	0.000491615	0.000824694	0.418728	0.534844	0.675374	1
SC	d1823.a1	GRMZM2G117989_P01*	Zm00001d048947	weakly similar to ( 174) AT3G04720 | Symbols: PR4, HEL, PR-4 | PR4 (PATHOGENESIS-RELATED 4); chitin binding | chr3:1285691-1286531 REVERSEweakly similar to ( 186) BARW_HORVU Barwin - Hordeum vulgare (Barley)moderately similar to ( 203) loc_os11g37970 12011.m07644 protein win1 precursor, putative, expressed seq=cds; coord=4:9657882..9658965:-1; parent_gene=GRMZM2G117989	Environmental adaptation	1.13404e+31	101.543	2.9174e-05	5.61677e-05	0.564295	0.667286	0.474872	1
SC	d1832.a1	GRMZM2G359581_P01	NA	seq=cds; coord=4:15251003..15252083:-1; parent_gene=GRMZM2G359581	notassigned	2.46924e+30	160.2	0.313947	0.358324	0.21135	0.335309	0.991359	1
SC	d1714.a1	GRMZM2G083810_P01	Zm00001d039566	weakly similar to ( 150) AT5G12020 | Symbols: HSP17.6II | HSP17.6II (17.6 KDA CLASS II HEAT SHOCK PROTEIN) | chr5:3882409-3882876 REVERSEmoderately similar to ( 231) HSP21_MAIZE 17.5 kDa class II heat shock protein - Zea mays (Maize)weakly similar to ( 197) loc_os01g08860 12001.m150501 protein 17.5 kDa class II heat shock protein, putative, expressed seq=cds; coord=3:8884623..8885815:-1; parent_g…	Folding, sorting and degradation	1.81929e+30	157.927	1.39202e-06	3.0801e-06	5.27939e-08	5.24064e-07	2.00949e-05	0.00217426
SC	d1788.a1	GRMZM2G465226_P01	Zm00001d018738	weakly similar to ( 143) AT5G57625 | Symbols: | allergen V5/Tpx-1-related family protein | chr5:23337865-23338577 FORWARDweakly similar to ( 177) PR13_HORVU Pathogenesis-related protein PRB1-3 precursor (PR-1B) (HV-8) - Hordeum vulgare (Barley)weakly similar to ( 194) loc_os07g03710 12007.m04841 protein pathogenesis-related protein PRB1-3 precursor, putative, expressed seq=cds; coord=7:3483732..3…	Environmental adaptation	4.53351e+27	65.1958	0.000419296	0.000709981	0.0533691	0.115722	0.0449697	0.586395
SC	d1518.a1	GRMZM2G038598_P01	Zm00001d029151	highly similar to ( 548) AT4G23920 | Symbols: UGE2 | UGE2 (UDP-D-glucose/UDP-D-galactose 4-epimerase 2); UDP-glucose 4-epimerase/ protein dimerization | chr4:12431416-12433666 FORWARDmoderately similar to ( 448) GALE1_PEA UDP-glucose 4-epimerase (EC 5.1.3.2) (Galactowaldenase) (UDP-galactose 4-epimerase) - Pisum sativum (Garden pea)highly similar to ( 611) loc_os05g51670 12005.m27995 protein UDP-…	Carbohydrate metabolism	8.59645e+26	9.50246	4.44089e-16	2.08011e-15	0.120959	0.219594	0.0143939	0.354317
SC	c973.a1	GRMZM2G438551_P01*	Zm00001d043175	weakly similar to ( 124) AT3G12490 | Symbols: ATCYSB | cysteine protease inhibitor, putative / cystatin, putative | chr3:3960523-3961777 REVERSEmoderately similar to ( 222) CYT1_MAIZE Cystatin-1 precursor (Cystatin I) (Corn kernel cysteine proteinase inhibitor) - Zea mays (Maize)weakly similar to ( 140) loc_os01g58890 12001.m43503 protein cystatin-1 precursor, putative, expressed seq=cds; coord=3…	Folding, sorting and degradation	1.0552e+23	64.9151	0	0	0.0322306	0.0774967	0.819366	1
SC	b98.a2	GRMZM2G001253_P01	NA	NA	NA	9.10209e+21	24.715	0.00599856	0.00894001	0.368412	0.492734	0.950184	1
SC	c769.a1	GRMZM2G090274_P01*	Zm00001d006725	highly similar to ( 764) AT3G26618 | Symbols: ERF1-3 | ERF1-3 (eukaryotic release factor 1-3); translation release factor | chr3:9788854-9790161 FORWARDhighly similar to ( 807) loc_os07g39870 12007.m079730 protein eukaryotic peptide chain release factor subunit 1-1, putative, expressed seq=cds; coord=2:208530771..208535295:-1; parent_gene=GRMZM2G090274	Translation	4.41043e+21	25587.8	3.95239e-14	1.65115e-13	0.846298	0.898094	0.479914	1
SC	c708.a1	GRMZM2G102596_P01	Zm00001d045315	moderately similar to ( 410) AT1G13060 | Symbols: PBE1 | PBE1; endopeptidase/ peptidase/ threonine-type endopeptidase | chr1:4452641-4454663 FORWARDmoderately similar to ( 393) PSB5_SPIOL Proteasome subunit beta type 5 precursor (EC 3.4.25.1) (20S proteasome subunit E) (Proteasome epsilon chain) - Spinacia oleracea (Spinach)moderately similar to ( 471) loc_os06g06030 12006.m31985 protein proteaso…	Folding, sorting and degradation	2.101e+21	7.37205	8.11435e-05	0.000150855	0.756011	0.823771	0.810105	1
SC	c801.a1	GRMZM2G031825_P01*	Zm00001d029036	moderately similar to ( 388) AT3G10850 | Symbols: GLX2-2, GLY2 | GLY2; hydroxyacylglutathione hydrolase | chr3:3397756-3399522 REVERSEmoderately similar to ( 476) loc_os03g21460 12003.m07550 protein hydroxyacylglutathione hydrolase, putative, expressed seq=cds; coord=1:54927991..54932353:-1; parent_gene=GRMZM2G031825	Xenobiotics degradation and metabolism	1.74388e+21	40.2683	0	0	0.104755	0.195717	0.882388	1
SC	c902.a1	GRMZM2G107839_P01*	Zm00001d044685	weakly similar to ( 109) AT5G59320 | Symbols: LTP3 | LTP3 (LIPID TRANSFER PROTEIN 3); lipid binding | chr5:23929051-23929492 FORWARDweakly similar to ( 135) NLTP3_HORVU Nonspecific lipid-transfer protein 3 precursor (LTP 3) (CW20) (CW-20) (CW-19) - Hordeum vulgare (Barley)weakly similar to ( 150) loc_os12g02340 12012.m26804 protein nonspecific lipid-transfer protein 3 precursor, putative, express…	Lipid metabolism	1.46058e+21	49.7036	0	0	0.0266238	0.0681015	0.733247	1
SC	d1617.a1	GRMZM2G412604_P01	Zm00001d016441	moderately similar to ( 461) AT5G36160 | Symbols: | aminotransferase-related | chr5:14233261-14235129 REVERSEvery weakly similar to (90.5) 1A12_CUCMA 1-aminocyclopropane-1-carboxylate synthase CMA101 (EC 4.4.1.14) (ACC synthase) (S-adenosyl-L-methionine methylthioadenosine-lyase) - Cucurbita maxima (Pumpkin) (Winter squash)highly similar to ( 716) loc_os02g20360 12002.m33659 protein tyrosine amin…	AminoAcid metabolism	1.41924e+21	131.658	0.529209	0.569189	2.0358e-08	2.10017e-07	0.492707	1
SC	d1423.a1	GRMZM2G336815_P01	Zm00001d008757	moderately similar to ( 438) AT5G15610 | Symbols: | proteasome family protein | chr5:5079579-5081929 FORWARDhighly similar to ( 593) loc_os04g01290 12004.m101446 protein PCI domain containing protein, expressed seq=cds; coord=8:18448251..18451290:-1; parent_gene=GRMZM2G336815	Folding, sorting and degradation	8.91574e+20	9.40559	0.159098	0.192125	0.192339	0.315798	0.267774	1
SC	d1095.a1	GRMZM2G109472_P01*	Zm00001d011855	highly similar to ( 573) AT3G54470 | Symbols: | uridine 5-monophosphate synthase / UMP synthase (PYRE-F) (UMPS) | chr3:20168285-20170245 REVERSEhighly similar to ( 579) PYR5_TOBAC Uridine 5-monophosphate synthase (UMP synthase) [Includes: Orotate phosphoribosyltransferase (EC 2.4.2.10) (OPRTase); Orotidine 5-phosphate decarboxylase (EC 4.1.1.23) (OMPdecase)] (Fragment) - Nicotiana tabacum (Common…	Transcription	7.65788e+20	40.9546	0.670321	0.70348	3.29527e-05	0.000213502	0.482731	1
SC	d1252.a1	GRMZM2G443985_P01*	Zm00001d045326	highly similar to ( 758) AT5G56630 | Symbols: PFK7 | PFK7 (PHOSPHOFRUCTOKINASE 7); 6-phosphofructokinase | chr5:22924311-22926728 FORWARDhighly similar to ( 899) loc_os06g05860 12006.m05312 protein 6-phosphofructokinase, putative, expressed seq=cds; coord=9:19154953..19160236:1; parent_gene=GRMZM2G443985	Carbohydrate metabolism	6.09287e+20	5.37099	0.000117108	0.000212959	0.0303084	0.0743621	0.783222	1
SC	d1176.a1	GRMZM2G110657_P01	Zm00001d018348	moderately similar to ( 219) AT4G00030 | Symbols: | plastid-lipid associated protein PAP / fibrillin family protein | chr4:13565-14366 FORWARDmoderately similar to ( 325) loc_os04g46610 12004.m35406 protein PAP fibrillin family protein, expressed seq=cds; coord=5:213125923..213128344:-1; parent_gene=GRMZM2G110657	Cell motility	3.90754e+20	15.9242	0.87632	0.893665	0.0185239	0.0518899	0.941538	1
SC	c769.a2	GRMZM2G085878_P01	NA	NA	NA	3.84259e+20	342.797	9.79028e-07	2.19774e-06	0.379466	0.50071	0.544021	1
SC	c459.a1	GRMZM2G001816_P01*	Zm00001d046317	moderately similar to ( 308) AT5G45775 | Symbols: | 60S ribosomal protein L11 (RPL11D) | chr5:18565281-18566496 REVERSEmoderately similar to ( 322) RL11_ORYSA 60S ribosomal protein L11 - Oryza sativa (Rice)moderately similar to ( 322) loc_os02g14059 12002.m77785 protein 60S ribosomal protein L11-1, putative, expressed seq=cds; coord=3:5434563..5436879:-1; parent_gene=GRMZM2G435338	Translation	3.5228e+20	5.50224	3.02197e-05	5.79747e-05	0.0274202	0.0695594	0.229005	1
SC	c634.a1	GRMZM2G159777_P01	Zm00001d047965	moderately similar to ( 383) AT5G05000 | Symbols: TOC34, ATTOC34, OEP34 | TOC34 (TRANSLOCON AT THE OUTER ENVELOPE MEMBRANE OF CHLOROPLASTS 34); GTP binding | chr5:1474262-1475772 REVERSEmoderately similar to ( 356) TOC34_PEA Translocase of chloroplast 34 (EC 3.6.5.-) (34 kDa chloroplast outer envelope protein) (GTP-binding protein OEP34) (GTP-binding protein IAP34) - Pisum sativum (Garden pea)hig…	Folding, sorting and degradation	3.44742e+20	1336.36	0.00031802	0.000547926	0.334348	0.461435	0.779877	1
SC	c229.a2	AC210013.4_FGP019	Zm00001d013034	moderately similar to ( 367) AT3G57490 | Symbols: | 40S ribosomal protein S2 (RPS2D) | chr3:21279824-21280887 REVERSEmoderately similar to ( 417) loc_os03g59310 12003.m10829 protein 40S ribosomal protein S2, putative, expressed seq=cds; coord=5:3430827..3432408:-1; parent_gene=AC210013.4_FG019	Translation	3.29867e+20	7.04926	0.360711	0.404026	0.0217544	0.0586988	0.00630892	0.21332
SC	c229.a3	GRMZM2G092663_P01*	Zm00001d034550	moderately similar to ( 395) AT3G57490 | Symbols: | 40S ribosomal protein S2 (RPS2D) | chr3:21279824-21280887 REVERSEmoderately similar to ( 446) loc_os03g59310 12003.m10829 protein 40S ribosomal protein S2, putative, expressed seq=cds; coord=1:290553103..290555088:1; parent_gene=GRMZM2G092663	Translation	2.71376e+20	5.32885	1.33136e-11	4.55863e-11	0.258013	0.385063	0.0050644	0.195703
SC	c914.a1	GRMZM2G147014_P01	Zm00001d017547	weakly similar to ( 116) CO410_WHEAT Dehydrin COR410 (Cold-induced COR410 protein) - Triticum aestivum (Wheat)weakly similar to ( 102) loc_os02g44870 12002.m09527 protein dehydrin COR410, putative, expressed seq=cds; coord=5:193849196..193850728:-1; parent_gene=GRMZM2G147014	notassigned	1.5254e+20	160.15	0	0	0.00989024	0.0310181	0.000383953	0.037767
SC	c836.a1	GRMZM2G139296_P01	Zm00001d012599	weakly similar to ( 112) loc_os09g39550 12009.m06893 protein expressed protein seq=cds; coord=8:171762195..171768664:1; parent_gene=GRMZM2G139296	notassigned	1.19847e+20	89.8628	4.86687e-06	1.01074e-05	0.000311181	0.00161874	0.996053	1
SC	c652.a1	GRMZM2G121494_P02	Zm00001d049883	weakly similar to ( 145) AT2G05620 | Symbols: PGR5 | PGR5 (proton gradient regulation 5); electron carrier | chr2:2081204-2081687 REVERSEweakly similar to ( 186) loc_os08g45190 12008.m08489 protein PGR5, putative, expressed seq=cds; coord=4:48159017..48159605:-1; parent_gene=GRMZM2G121494	Energy metabolism	1.00881e+20	6.1863	0	0	0.0514335	0.111974	0.215911	1
SC	c982.a1	GRMZM2G049811_P01	Zm00001d045965	highly similar to ( 592) AT5G14780 | Symbols: FDH | FDH (FORMATE DEHYDROGENASE); NAD or NADH binding / binding / catalytic/ cofactor binding / oxidoreductase, acting on the CH-OH group of donors, NAD or NADP as acceptor | chr5:4777043-4779190 FORWARDhighly similar to ( 692) FDH1_ORYSA Formate dehydrogenase 1, mitochondrial precursor (EC 1.2.1.2) (NAD-dependent formate dehydrogenase 1) (FDH 1) - O…	Carbohydrate metabolism	9.39067e+19	790.176	0	0	0.24383	0.36847	0.0971625	0.790449
SC	c781.a1	GRMZM2G171628_P01	Zm00001d006439	moderately similar to ( 278) AT5G47030 | Symbols: | ATP synthase delta chain, mitochondrial | chr5:19090384-19092034 FORWARDmoderately similar to ( 292) ATP4_IPOBA ATP synthase delta chain, mitochondrial precursor (EC 3.6.3.14) - Ipomoea batatas (Sweet potato) (Batate)moderately similar to ( 325) loc_os07g31300 12007.m07398 protein ATP synthase delta chain, mitochondrial precursor, putative, expr…	Energy metabolism	8.44829e+19	21.3352	9.65845e-07	2.17265e-06	0.160368	0.275864	0.423586	1
SC	c305.a3	GRMZM2G087206_P01	Zm00001d010054	moderately similar to ( 401) AT2G37770 | Symbols: | aldo/keto reductase family protein | chr2:15834888-15836659 FORWARDmoderately similar to ( 241) ALDR_HORVU Aldose reductase (EC 1.1.1.21) (AR) (Aldehyde reductase) - Hordeum vulgare (Barley)moderately similar to ( 443) loc_os01g62870 12001.m43275 protein aldose reductase, putative, expressed seq=cds; coord=8:95631071..95638906:1; parent_gene=GRM…	Carbohydrate metabolism	8.23668e+19	2150.38	0	0	0.000163376	0.000901903	0.974202	1
SC	d1417.a1	GRMZM2G154093_P01*	Zm00001d045610	highly similar to ( 665) AT5G54080 | Symbols: HGO | HGO (HOMOGENTISATE 1,2-DIOXYGENASE); homogentisate 1,2-dioxygenase | chr5:21945920-21948070 FORWARDhighly similar to ( 756) HGD_ORYSA Homogentisate 1,2-dioxygenase (EC 1.13.11.5) (Homogentisicase) (Homogentisate oxygenase) (Homogentisic acid oxidase) - Oryza sativa (Rice)highly similar to ( 756) loc_os06g01360 12006.m31818 protein homogentisate …	AminoAcid metabolism	5.38404e+19	14.7267	0	0	0.00566306	0.0194521	0.0109985	0.290253
SC	d1715.a1	GRMZM2G162359_P01	Zm00001d018966	weakly similar to ( 162) AT5G24090 | Symbols: | acidic endochitinase (CHIB1) | chr5:8143805-8145153 REVERSEmoderately similar to ( 439) XIP1_WHEAT Xylanase inhibitor protein 1 precursor (Class III chitinase homolog) (XIP-I protein) - Triticum aestivum (Wheat)moderately similar to ( 369) loc_os06g25010 12006.m07149 protein xylanase inhibitor protein 1 precursor, putative, expressed seq=cds; coord=…	Environmental adaptation	5.30712e+19	14.3614	3.88903e-08	9.9714e-08	0.00307132	0.011579	0.0566204	0.607436
SC	d1343.a1	GRMZM2G148387_P01	Zm00001d017240	weakly similar to ( 149) AT5G40370 | Symbols: | glutaredoxin, putative | chr5:16147826-16148900 REVERSEweakly similar to ( 155) GLRX_ORYSA Glutaredoxin - Oryza sativa (Rice)weakly similar to ( 166) loc_os02g40500 12002.m09136 protein OsGrx_C2.1 - glutaredoxin subgroup I, expressed seq=cds; coord=5:185405145..185408787:1; parent_gene=GRMZM2G148387	Folding, sorting and degradation	5.1687e+19	16.3625	0	0	0.256065	0.383743	0.854407	1
SC	c248.a2	GRMZM2G008714_P01*	Zm00001d026619	highly similar to ( 870) AT5G08570 | Symbols: | pyruvate kinase, putative | chr5:2778433-2780300 FORWARDhighly similar to ( 875) KPYC_SOYBN Pyruvate kinase, cytosolic isozyme (EC 2.7.1.40) (PK) - Glycine max (Soybean)highly similar to ( 961) loc_os04g58110 12004.m10693 protein pyruvate kinase, cytosolic isozyme, putative, expressed seq=cds; coord=10:148228962..148233420:1; parent_gene=GRMZM2G0087…	Carbohydrate metabolism	4.76532e+19	376.765	4.74065e-13	1.83192e-12	0.369574	0.493069	0.867221	1
SC	d1345.a1	GRMZM5G898880_P01	Zm00001d044920	weakly similar to ( 200) AT1G47480 | Symbols: | hydrolase | chr1:17417623-17419296 FORWARDvery weakly similar to (91.7) GID1_ORYSA Gibberellin receptor GID1 (EC 3.-.-.-) (Gibberellin-insensitive dwarf protein 1) (Protein GIBBERELLIN INSENSITIVE DWARF1) - Oryza sativa (Rice)moderately similar to ( 298) loc_os06g11130 12006.m05830 protein gibberellin receptor GID1L2, putative, expressed seq=cds; co…	notassigned	2.82205e+19	31.1523	0.0158462	0.0222959	0.00894916	0.0288184	0.256948	1
SC	d1467.a1	GRMZM2G106622_P01	Zm00001d023664	moderately similar to ( 290) AT5G13200 | Symbols: | GRAM domain-containing protein / ABA-responsive protein-related | chr5:4207081-4208079 FORWARDmoderately similar to ( 420) loc_os12g29400 12012.m06754 protein ABA-responsive protein, putative, expressed seq=cds; coord=10:14302293..14305526:1; parent_gene=GRMZM2G106622	Chemical structure transformation maps	2.40655e+19	28.8951	0	0	4.31677e-12	7.29804e-11	1.2351e-10	6.68187e-08
SC	c436.a2	GRMZM2G009323_P01	Zm00001d026472	highly similar to ( 764) AT4G34200 | Symbols: EDA9 | EDA9 (embryo sac development arrest 9); ATP binding | chr4:16374041-16376561 REVERSEweakly similar to ( 102) DHGY_CUCSA Glycerate dehydrogenase (EC 1.1.1.29) (NADH-dependent hydroxypyruvate reductase) (HPR) (GDH) - Cucumis sativus (Cucumber)highly similar to ( 864) loc_os04g55720 12004.m35214 protein D-3-phosphoglycerate dehydrogenase, chloropl…	AminoAcid metabolism	2.11872e+19	12.8831	5.8712e-09	1.6042e-08	2.48126e-05	0.000164707	0.134654	0.888387
SC	c934.a1	GRMZM2G074158_P01*	Zm00001d034074	nearly identical (1326) AT3G29320 | Symbols: | glucan phosphorylase, putative | chr3:11252871-11257587 FORWARDnearly identical (1356) PHSL_IPOBA Alpha-1,4 glucan phosphorylase L isozyme, chloroplast precursor (EC 2.4.1.1) (Starch phosphorylase L) - Ipomoea batatas (Sweet potato) (Batate)nearly identical (1427) loc_os03g55090 12003.m10424 protein alpha-1,4 glucan phosphorylase, L isozyme, chloropl…	Carbohydrate metabolism	2.00949e+19	357.976	1.98235e-05	3.90692e-05	0	0	0.109974	0.814548
SC	d1167.a1	GRMZM2G314898_P01	Zm00001d039535	moderately similar to ( 272) AT3G62160 | Symbols: | transferase family protein | chr3:23014333-23015808 REVERSEvery weakly similar to (94.4) HCBT1_DIACA Anthranilate N-benzoyltransferase protein 1 (EC 2.3.1.144) (Anthranilate N-hydroxycinnamoyl/benzoyltransferase 1) - Dianthus caryophyllus (Carnation) (Clove pink)highly similar to ( 715) loc_os01g09010 12001.m07526 protein 3-N-debenzoyl-2-deoxyta…	notassigned	1.85346e+19	7.70954	1.90907e-11	6.41496e-11	2.59574e-05	0.000171256	0.655606	1
SC	c948.a1	GRMZM2G142873_P01	Zm00001d020537	highly similar to ( 710) AT4G31780 | Symbols: MGD1, MGDA | MGD1 (MONOGALACTOSYL DIACYLGLYCEROL SYNTHASE 1); 1,2-diacylglycerol 3-beta-galactosyltransferase/ UDP-galactosyltransferase/ UDP-glycosyltransferase/ transferase, transferring glycosyl groups | chr4:15374222-15376873 FORWARDhighly similar to ( 817) loc_os09g25580 12009.m05710 protein MGDG synthase type A, putative, expressed seq=cds; coor…	Lipid metabolism	1.82975e+19	2697.31	1.47522e-05	2.93958e-05	0.0013837	0.00606139	0.402943	1
SC	d1149.a1	GRMZM2G027741_P01*	Zm00001d017704	moderately similar to ( 372) AT5G16880 | Symbols: | VHS domain-containing protein / GAT domain-containing protein | chr5:5549658-5551274 FORWARDmoderately similar to ( 445) loc_os02g46962 12002.m100323 protein protein transporter, putative, expressed seq=cds; coord=5:199376854..199379060:1; parent_gene=GRMZM2G027741	Transport and catabolism	1.38649e+19	82.7033	0.0570356	0.0736427	0.0893422	0.174349	0.587535	1
SC	c850.a1	GRMZM2G117870_P01	Zm00001d006296	nearly identical (1400) AT1G14610 | Symbols: TWN2, VALRS | TWN2 (TWIN 2); ATP binding / aminoacyl-tRNA ligase/ nucleotide binding / valine-tRNA ligase | chr1:5008502-5014486 REVERSEnearly identical (1791) loc_os03g48850 12003.m35366 protein valyl-tRNA synthetase, putative, expressed seq=cds; coord=2:197582100..197595530:1; parent_gene=GRMZM2G117870	Translation	1.27635e+19	27.8372	0.00445789	0.00674606	0.0275892	0.0695839	0.923927	1
SC	c345.a2	GRMZM2G117300_P01	Zm00001d005094	moderately similar to ( 305) AT2G38270 | Symbols: CXIP2, ATGRX2 | CXIP2 (CAX-INTERACTING PROTEIN 2); electron carrier/ protein disulfide oxidoreductase | chr2:16031347-16033054 REVERSEmoderately similar to ( 447) loc_os12g07650 12012.m04754 protein OsGrx_S16 - glutaredoxin subgroup II, expressed seq=cds; coord=2:153399473..153402030:1; parent_gene=GRMZM2G117300	Membrane transport	1.26704e+19	22818	9.48133e-07	2.13725e-06	3.41503e-07	3.05377e-06	0.0767506	0.687152
SC	d1612.a1	GRMZM2G101142_P01	Zm00001d006853	weakly similar to ( 164) AT3G59530 | Symbols: | strictosidine synthase family protein | chr3:21993710-21995164 FORWARDvery weakly similar to (96.7) STSY_CATRO Strictosidine synthase precursor (EC 4.3.3.2) - Catharanthus roseus (Rosy periwinkle) (Madagascar periwinkle)moderately similar to ( 493) loc_os07g42250 12007.m08460 protein strictosidine synthase 1 precursor, putative, expressed seq=cds; c…	Biosynthesis of other secondary metabolites	1.14327e+19	8.90887	1.56661e-06	3.45228e-06	0.197853	0.321437	0.547616	1
SC	d1521.a1	GRMZM2G176396_P01*	Zm00001d038689	highly similar to ( 522) AT2G14260 | Symbols: PIP | PIP; aminopeptidase | chr2:6041441-6043475 REVERSEhighly similar to ( 606) loc_os05g43830 12005.m27624 protein proline iminopeptidase, putative, expressed seq=cds; coord=6:158451653..158457625:-1; parent_gene=GRMZM2G176396	Folding, sorting and degradation	1.07901e+19	1043.99	0.00102567	0.00166884	8.39653e-07	7.0977e-06	0.0987294	0.790676
SC	c824.a2	GRMZM2G034724_P01	Zm00001d035597	moderately similar to ( 431) AT1G07750 | Symbols: | cupin family protein | chr1:2404300-2405863 REVERSEvery weakly similar to (95.9) GLUB2_ORYSA Glutelin type-B 2 precursor (Glutelin type-B 7) [Contains: Glutelin type-B 2 acidic chain; Glutelin type-B 2 basic chain] - Oryza sativa (Rice)highly similar to ( 517) loc_os05g02520 12005.m27675 protein legumin-like protein, putative, expressed seq=cds;…	Signaling molecules and interactions	1.05953e+19	15.9719	0.341384	0.384768	0.857042	0.904702	0.335728	1
SC	c497.a1	GRMZM2G089308_P01	Zm00001d010336	moderately similar to ( 239) AT4G21860 | Symbols: MSRB2 | MSRB2 (methionine sulfoxide reductase B 2); peptide-methionine-(S)-S-oxide reductase | chr4:11600282-11601507 REVERSEmoderately similar to ( 267) loc_os05g33510 12005.m07583 protein expressed protein seq=cds; coord=8:107791201..107796617:1; parent_gene=GRMZM2G089308	Transcription	1.04209e+19	12.8657	1.79634e-13	7.06778e-13	0.00123458	0.00554278	0.746336	1
SC	d1704.a1	GRMZM2G118610_P01	Zm00001d024314	moderately similar to ( 379) AT4G37990 | Symbols: ELI3-2, ELI3, ATCAD8, CAD-B2 | ELI3-2 (ELICITOR-ACTIVATED GENE 3-2); aryl-alcohol dehydrogenase/ mannitol dehydrogenase | chr4:17855964-17857388 FORWARDmoderately similar to ( 385) MTDH_MESCR Probable mannitol dehydrogenase (EC 1.1.1.255) (NAD-dependent mannitol dehydrogenase) - Mesembryanthemum crystallinum (Common ice plant)moderately similar to…	Biosynthesis of other secondary metabolites	1.03974e+19	2021.18	5.40134e-07	1.24346e-06	1.97864e-07	1.81431e-06	0.00624584	0.21332
SC	c791.a1	GRMZM2G015033_P01	Zm00001d015705	weakly similar to ( 121) AT3G15110 | Symbols: | unknown protein | chr3:5084394-5085823 REVERSEmoderately similar to ( 218) loc_os02g20490 12002.m07291 protein expressed protein seq=cds; coord=5:107135018..107146120:1; parent_gene=GRMZM2G015033	notassigned	1.0324e+19	20.6719	2.65867e-06	5.70769e-06	0.935655	0.956073	0.331306	1
SC	d1083.a1	GRMZM2G064133_P01	Zm00001d049656	moderately similar to ( 333) AT3G11400 | Symbols: EIF3G1, ATEIF3G1 | eukaryotic translation initiation factor 3G / eIF3g | chr3:3578536-3580366 FORWARDmoderately similar to ( 379) loc_os02g54700 12002.m10498 protein eukaryotic translation initiation factor 3 subunit 4, putative, expressed seq=cds; coord=4:37224780..37227724:1; parent_gene=GRMZM2G064133	Translation	9.70653e+18	709.443	0.299553	0.34298	0.310006	0.43904	0.276478	1
SC	c417.a1	GRMZM2G039251_P01	Zm00001d006667	moderately similar to ( 491) AT5G23250 | Symbols: | succinyl-CoA ligase (GDP-forming) alpha-chain, mitochondrial, putative / succinyl-CoA synthetase, alpha chain, putative / SCS-alpha, putative | chr5:7830460-7832265 FORWARDhighly similar to ( 563) SUCA_ORYSA Probable succinyl-CoA ligase [GDP-forming] subunit alpha, mitochondrial precursor (EC 6.2.1.4) (Succinyl-CoA synthetase subunit alpha) (SCS…	Carbohydrate metabolism	9.19896e+18	7.49172	4.06445e-06	8.52274e-06	0.00260763	0.0102227	0.0203268	0.399883
SC	d1123.a1	GRMZM2G463891_P01	NA	NA	NA	8.97467e+18	1907.14	6.59995e-05	0.000123336	0.897584	0.931176	0.646356	1
SC	d1280.a1	GRMZM2G071071_P01	Zm00001d013019	highly similar to ( 771) AT5G27540 | Symbols: MIRO1 | MIRO1 (Miro-related GTP-ase 1); GTP binding | chr5:9722816-9727112 FORWARDnearly identical (1030) loc_os03g59590 12003.m10856 protein expressed protein seq=cds; coord=5:3195909..3207226:1; parent_gene=GRMZM2G071071	Signal transduction	8.78738e+18	139.949	0.568509	0.606037	0.049723	0.108908	0.694436	1
SC	d1009.a1	GRMZM2G069024_P06	Zm00001d043110	highly similar to ( 551) AT1G02850 | Symbols: BGLU11 | BGLU11 (BETA GLUCOSIDASE 11); catalytic/ cation binding / hydrolase, hydrolyzing O-glycosyl compounds | chr1:630569-633085 FORWARDmoderately similar to ( 339) MYRO_BRANA Myrosinase precursor (EC 3.2.1.147) (Sinigrinase) (Thioglucosidase) - Brassica napus (Rape)highly similar to ( 756) loc_os01g70520 12001.m43365 protein beta-glucosidase homol…	Carbohydrate metabolism	8.58116e+18	77.1209	0.140526	0.171227	7.08322e-14	1.50275e-12	0.345645	1
SC	d1329.a1	GRMZM2G144653_P02	Zm00001d019034	weakly similar to ( 132) AT3G51030 | Symbols: ATTRX1, ATTRX H1 | ATTRX1; oxidoreductase, acting on sulfur group of donors, disulfide as acceptor | chr3:18951123-18951955 REVERSEweakly similar to ( 161) TRXH_ORYSA Thioredoxin H-type (TRX-H) (Phloem sap 13 kDa protein 1) - Oryza sativa (Rice)weakly similar to ( 161) loc_os07g08840 12007.m079626 protein thioredoxin H-type, putative, expressed seq=cd…	Folding, sorting and degradation	7.62426e+18	838.823	6.28164e-13	2.37648e-12	0.313528	0.441715	0.00174352	0.11097
SC	c209.a7	GRMZM2G109448_P01	Zm00001d021300	weakly similar to ( 152) AT5G02560 | Symbols: HTA12 | HTA12; DNA binding | chr5:575437-576456 FORWARDweakly similar to ( 161) H2A6_ORYSA Probable histone H2A.6 - Oryza sativa (Rice)weakly similar to ( 161) loc_os05g02300 12005.m04766 protein histone H2A, putative, expressed seq=cds; coord=7:143296604..143298282:-1; parent_gene=GRMZM2G109448	Replication and repair	7.43851e+18	149.347	0.289265	0.332256	0.274346	0.404418	0.397224	1
SC	c449.a2	GRMZM2G135108_P01	Zm00001d037547	moderately similar to ( 278) AT4G11290 | Symbols: | peroxidase, putative | chr4:6869993-6871476 FORWARDmoderately similar to ( 270) PER1_ORYSA Peroxidase 1 precursor (EC 1.11.1.7) - Oryza sativa (Rice)moderately similar to ( 471) loc_os05g06970 12005.m05223 protein peroxidase 1 precursor, putative, expressed seq=cds; coord=6:125011318..125012919:1; parent_gene=GRMZM2G135108	Carbohydrate metabolism	7.26765e+18	12.4534	2.11815e-10	6.47412e-10	6.66134e-16	1.80189e-14	0.19671	1
SC	d1224.a1	GRMZM2G102167_P01*	Zm00001d022602	weakly similar to ( 167) AT5G66090 | Symbols: | unknown protein | chr5:26425831-26426955 FORWARDweakly similar to ( 191) loc_os09g36990 12009.m06648 protein expressed protein seq=cds; coord=7:175302491..175305743:-1; parent_gene=GRMZM2G102167	notassigned	6.92511e+18	2.23983	0	0	0.0236664	0.0624563	0.00696318	0.228136
SC	b23.a7	GRMZM2G146206_P02	Zm00001d012407	moderately similar to ( 315) AT3G55440 | Symbols: ATCTIMC, TPI | TPI (TRIOSEPHOSPHATE ISOMERASE); triose-phosphate isomerase | chr3:20553794-20556078 FORWARDmoderately similar to ( 320) TPIS_PETHY Triosephosphate isomerase, cytosolic (EC 5.3.1.1) (TIM) (Triose-phosphate isomerase) - Petunia hybrida (Petunia)moderately similar to ( 366) loc_os01g62420 12001.m43510 protein triosephosphate isomerase…	Carbohydrate metabolism	6.75183e+18	6.79895	0.376257	0.418407	0.704556	0.781876	0.991082	1
SC	c389.a3	GRMZM2G136344_P02	Zm00001d025545	moderately similar to ( 295) AT5G67030 | Symbols: ABA1, LOS6, NPQ2, ATABA1, ZEP, IBS3, ATZEP | ABA1 (ABA DEFICIENT 1); zeaxanthin epoxidase | chr5:26754026-26757090 REVERSEmoderately similar to ( 312) ABA2_NICPL Zeaxanthin epoxidase, chloroplast precursor (EC 1.14.13.90) - Nicotiana plumbaginifolia (Leadwort-leaved tobacco)moderately similar to ( 412) loc_os04g37619 12004.m35575 protein zeaxanthi…	Chemical structure transformation maps	6.64526e+18	74.0172	1.81943e-06	3.969e-06	0.261972	0.388907	0.662781	1
SC	d1094.a1	GRMZM2G157329_P01*	Zm00001d028655	weakly similar to ( 200) AT5G59950 | Symbols: | RNA and export factor-binding protein, putative | chr5:24140235-24141410 FORWARDmoderately similar to ( 308) loc_os03g17010 12003.m34840 protein THO complex subunit 4, putative, expressed seq=cds; coord=1:41535740..41539719:-1; parent_gene=GRMZM2G157329	Transcription	6.31759e+18	38.0846	0.000106971	0.000195511	0.510873	0.616924	0.570479	1
SC	c974.a1	GRMZM2G157470_P01	Zm00001d033204	weakly similar to ( 110) AT3G15790 | Symbols: MBD11, ATMBD11 | MBD11; DNA binding / methyl-CpG binding | chr3:5343209-5344386 FORWARDweakly similar to ( 181) loc_os12g42550 12012.m26979 protein brain acid soluble protein 1, putative, expressed seq=cds; coord=1:250061761..250067450:1; parent_gene=GRMZM2G157470	Transcription	6.29201e+18	31.7224	0	0	0.00186316	0.00772389	0.51266	1
SC	c904.a1	GRMZM2G013652_P01*	Zm00001d022307	weakly similar to ( 137) AT1G23100 | Symbols: | 10 kDa chaperonin, putative | chr1:8195867-8196336 FORWARDweakly similar to ( 133) CH10_BRANA 10 kDa chaperonin (Protein CPN10) (Protein groES) - Brassica napus (Rape)weakly similar to ( 177) loc_os07g44740 12007.m08695 protein chaperonin, putative, expressed seq=cds; coord=7:169267359..169269362:1; parent_gene=GRMZM2G013652	Folding, sorting and degradation	6.17268e+18	30.0592	4.19609e-11	1.34723e-10	0.0182452	0.0512762	0.432931	1
SC	c625.a1	GRMZM2G042592_P01	Zm00001d010000	moderately similar to ( 224) AT4G29670 | Symbols: ACHT2 | thioredoxin family protein | chr4:14535983-14537108 REVERSEmoderately similar to ( 306) loc_os05g11090 12005.m27738 protein thioredoxin-like 6, chloroplast precursor, putative, expressed seq=cds; coord=8:92487006..92499794:-1; parent_gene=GRMZM2G042592	Folding, sorting and degradation	5.66502e+18	11.9739	1.93504e-11	6.48209e-11	0.389986	0.512093	0.890042	1
SC	d1662.a1	GRMZM2G138527_P01	Zm00001d015431	very weakly similar to (93.6) AT4G30010 | Symbols: | unknown protein | chr4:14672947-14673219 FORWARDweakly similar to ( 140) loc_os02g07910 12002.m100775 protein fiber protein Fb15, putative, expressed seq=cds; coord=5:87414860..87419429:1; parent_gene=GRMZM2G138527	notassigned	5.44359e+18	9.75148	0.000277993	0.000483583	0.361484	0.48725	0.637517	1
SC	c114.a3	GRMZM2G402368_P01	Zm00001d041861	moderately similar to ( 292) AT3G56310 | Symbols: | alpha-galactosidase, putative / melibiase, putative / alpha-D-galactoside galactohydrolase, putative | chr3:20882886-20885745 FORWARDmoderately similar to ( 231) AGAL_ORYSA Alpha-galactosidase precursor (EC 3.2.1.22) (Melibiase) (Alpha-D-galactoside galactohydrolase) - Oryza sativa (Rice)moderately similar to ( 359) loc_os07g48160 12007.m09030 p…	Carbohydrate metabolism	4.99606e+18	155.702	0.781573	0.810021	0.0198814	0.0545983	0.877132	1
SC	c807.a1	GRMZM2G078396_P01*	Zm00001d018466	moderately similar to ( 277) AT3G04400 | Symbols: emb2171 | emb2171 (embryo defective 2171); structural constituent of ribosome | chr3:1167339-1168308 FORWARDmoderately similar to ( 274) RL23_TOBAC 60S ribosomal protein L23 - Nicotiana tabacum (Common tobacco)moderately similar to ( 279) loc_os10g32920 12010.m06128 protein 60S ribosomal protein L23, putative, expressed seq=cds; coord=5:30596598..…	Translation	4.98592e+18	20.9114	3.98962e-06	8.38207e-06	0.815979	0.874387	0.746565	1
SC	c726.a2	GRMZM2G083243_P01*	Zm00001d021891	highly similar to ( 793) AT5G19780 | Symbols: TUA5 | TUA5; structural constituent of cytoskeleton | chr5:6687212-6688926 FORWARDhighly similar to ( 813) TBA5_MAIZE Tubulin alpha-5 chain (Alpha-5 tubulin) - Zea mays (Maize)highly similar to ( 805) loc_os07g38730 12007.m08118 protein tubulin alpha-1 chain, putative, expressed seq=cds; coord=2:206628370..206632051:1; parent_gene=GRMZM2G099167	Cell motility	4.78765e+18	1.38085e+06	0	0	0.281323	0.411508	0.646422	1
SC	c904.a2	GRMZM2G035063_P01*	Zm00001d007031	weakly similar to ( 137) AT1G23100 | Symbols: | 10 kDa chaperonin, putative | chr1:8195867-8196336 FORWARDweakly similar to ( 132) CH10_BRANA 10 kDa chaperonin (Protein CPN10) (Protein groES) - Brassica napus (Rape)weakly similar to ( 173) loc_os07g44740 12007.m08695 protein chaperonin, putative, expressed seq=cds; coord=6:153468889..153470811:1; parent_gene=GRMZM2G410812	Folding, sorting and degradation	4.73507e+18	33.1131	2.12778e-07	5.07106e-07	0.0834981	0.165164	0.635733	1
SC	d1491.a1	GRMZM2G128922_P01*	Zm00001d017869	NA	NA	4.64162e+18	222.13	0.64997	0.683448	0.403794	0.5214	0.510432	1
SC	d1228.a1	GRMZM2G165535_P01*	Zm00001d001789	moderately similar to ( 406) AT2G45790 | Symbols: ATPMM, PMM | PMM (PHOSPHOMANNOMUTASE); phosphomannomutase | chr2:18855876-18857753 FORWARDmoderately similar to ( 471) loc_os04g58580 12004.m101698 protein phosphomannomutase, putative, expressed seq=cds; coord=2:958698..961773:-1; parent_gene=GRMZM2G165535	Carbohydrate metabolism	4.35781e+18	89.4115	0	0	0.119427	0.217177	0.173526	0.971918
SC	d1014.a1	GRMZM2G015875_P01	Zm00001d051600	moderately similar to ( 412) AT1G67230 | Symbols: LINC1 | LINC1 (LITTLE NUCLEI1) | chr1:25151561-25156032 REVERSEnearly identical (1291) loc_os02g48010 12002.m09835 protein nuclear matrix constituent protein 1, putative, expressed seq=cds; coord=4:161070624..161077204:-1; parent_gene=GRMZM2G015875	Folding, sorting and degradation	4.04646e+18	1770.89	2.06116e-09	5.86889e-09	0.0925591	0.178837	0.0404531	0.561158
SC	c360.a3	GRMZM2G005461_P01	NA	weakly similar to ( 131) AT5G37640 | Symbols: UBQ9 | UBQ9; protein binding | chr5:14952782-14953750 REVERSEweakly similar to ( 131) UBIQ_CHLRE Ubiquitin - Chlamydomonas reinhardtiiweakly similar to ( 131) loc_os09g31031 12009.m60088 protein ubiquitin, putative, expressed seq=cds; coord=9:19289416..19290344:-1; parent_gene=GRMZM2G005461	Folding, sorting and degradation	3.8857e+18	5.79484	0.0219518	0.0298765	0.410915	0.528041	0.520141	1
SC	d1274.a2	GRMZM2G006178_P01	Zm00001d047534	nearly identical (1121) AT4G19210 | Symbols: ATRLI2, RLI2 | ATRLI2; transporter | chr4:10501906-10504776 FORWARDvery weakly similar to (84.7) CYSA_CHLVU Probable sulfate/thiosulfate import ATP-binding protein cysA (EC 3.6.3.25) (Sulfate-transporting ATPase) - Chlorella vulgaris (Green alga)nearly identical (1187) loc_os11g34350 12011.m07293 protein ATP-binding cassette sub-family E member 1, puta…	Transcription	3.80006e+18	293.469	0.00384883	0.0058654	0.223393	0.346788	0.212144	1
SC	c662.a1	GRMZM2G039841_P01	Zm00001d016826	weakly similar to ( 149) AT5G07020 | Symbols: | proline-rich family protein | chr5:2180669-2182284 REVERSEweakly similar to ( 196) loc_os02g35090 12002.m08597 protein expressed protein seq=cds; coord=5:173388723..173390275:-1; parent_gene=GRMZM2G039841	notassigned	3.77037e+18	20.8288	0.356195	0.399796	0.357747	0.484149	0.916691	1
SC	d1484.a1	GRMZM2G056335_P01	Zm00001d007378	moderately similar to ( 319) AT2G36780 | Symbols: | UDP-glucoronosyl/UDP-glucosyl transferase family protein | chr2:15417618-15419108 REVERSEweakly similar to ( 169) ZOX_PHAVU Zeatin O-xylosyltransferase (EC 2.4.2.40) (Zeatin O-beta-D-xylosyltransferase) - Phaseolus vulgaris (Kidney bean) (French bean)highly similar to ( 575) loc_os05g08480 12005.m05364 protein cytokinin-O-glucosyltransferase 1, …	Carbohydrate metabolism	3.58765e+18	45.3413	0.0703677	0.0898912	1.0359e-08	1.12084e-07	0.787509	1
SC	d1093.a2	GRMZM2G031354_P01	Zm00001d026282	weakly similar to ( 114) AT3G22142 | Symbols: | structural constituent of cell wall | chr3:7803604-7808046 REVERSEvery weakly similar to (96.7) 14KD_DAUCA 14 kDa proline-rich protein DC2.15 precursor - Daucus carota (Carrot)weakly similar to ( 167) loc_os04g52260 12004.m10121 protein 36.4 kDa proline-rich protein, putative, expressed seq=cds; coord=10:141962515..141963697:1; parent_gene=GRMZM2G03…	misc	3.24871e+18	117.785	0	0	0.194271	0.317466	0.672347	1
SC	c366.a2	GRMZM2G119219_P01*	Zm00001d052493	moderately similar to ( 297) AT5G19140 | Symbols: ATAILP1, AILP1 | AILP1 | chr5:6423398-6425785 FORWARDweakly similar to ( 105) TSJT1_TOBAC Stem-specific protein TSJT1 - Nicotiana tabacum (Common tobacco)moderately similar to ( 367) loc_os11g05050 12011.m28725 protein stem-specific protein TSJT1, putative, expressed seq=cds; coord=4:187875354..187877373:-1; parent_gene=GRMZM2G119219	Chemical structure transformation maps	2.93537e+18	228.804	0	0	0.143978	0.251671	0.371316	1
SC	d1268.a1	GRMZM2G046558_P01*	Zm00001d011891	moderately similar to ( 432) AT2G41530 | Symbols: ATSFGH, SFGH | SFGH (S-FORMYLGLUTATHIONE HYDROLASE); S-formylglutathione hydrolase/ hydrolase, acting on ester bonds | chr2:17323656-17325430 REVERSEmoderately similar to ( 495) loc_os01g71300 12001.m43439 protein esterase D, putative, expressed seq=cds; coord=8:159254849..159263818:-1; parent_gene=GRMZM2G046558	notassigned	2.86725e+18	10.5142	1.60135e-08	4.22601e-08	0.0120141	0.0363108	0.491805	1
SC	d1061.a1	GRMZM2G146472_P01*	Zm00001d004837	weakly similar to ( 180) AT1G20220 | Symbols: | nucleic acid binding | chr1:7005090-7007285 REVERSEmoderately similar to ( 270) loc_os11g06760 12011.m079943 protein expressed protein seq=cds; coord=2:137976616..137986746:-1; parent_gene=GRMZM2G146472	Transcription	2.79721e+18	152.78	4.44089e-16	2.08011e-15	0.000279035	0.00148727	0.311203	1
SC	a1.a6	GRMZM2G110714_P01*	Zm00001d012702	nearly identical (1637) AT3G14940 | Symbols: ATPPC3 | ATPPC3 (PHOSPHOENOLPYRUVATE CARBOXYLASE 3); phosphoenolpyruvate carboxylase | chr3:5025584-5029476 FORWARDnearly identical (1880) CAPP1_SACHY Phosphoenolpyruvate carboxylase, housekeeping isozyme (EC 4.1.1.31) (PEPCase) (PEPC) - Saccharum hybrid (Sugarcane)nearly identical (1692) loc_os01g55350 12001.m11694 protein phosphoenolpyruvate carboxyl…	Energy metabolism	2.79579e+18	52.5228	0.413422	0.455986	0.445889	0.557051	0.606599	1
SC	d1214.a1	GRMZM2G033555_P01*	Zm00001d046697	moderately similar to ( 350) AT2G33590 | Symbols: | cinnamoyl-CoA reductase family | chr2:14224622-14226365 FORWARDmoderately similar to ( 214) DFRA_MAIZE Dihydroflavonol-4-reductase (EC 1.1.1.219) (DFR) (Dihydrokaempferol 4-reductase) - Zea mays (Maize)moderately similar to ( 473) loc_os06g41810 12006.m08713 protein dihydroflavonol-4-reductase, putative, expressed seq=cds; coord=9:99409919..9941…	Biosynthesis of other secondary metabolites	2.71368e+18	292.537	0.0110802	0.0159794	0.204329	0.328505	0.76928	1
SC	c872.a1	GRMZM2G074040_P01	Zm00001d016707	moderately similar to ( 299) AT3G10130 | Symbols: | SOUL heme-binding family protein | chr3:3131122-3133158 REVERSEmoderately similar to ( 405) loc_os02g33020 12002.m08395 protein SOUL heme-binding protein, putative, expressed seq=cds; coord=5:169224236..169226800:1; parent_gene=GRMZM2G074040	redox:heme	2.63618e+18	18.636	0.102777	0.128263	0.0249724	0.0650821	0.858804	1
SC	d1545.a1	GRMZM2G157296_P01	Zm00001d035052	weakly similar to ( 147) AT1G33810 | Symbols: | unknown protein | chr1:12265084-12266655 FORWARDmoderately similar to ( 267) loc_os08g02060 12008.m04352 protein expressed protein seq=cds; coord=6:3192519..3195537:1; parent_gene=GRMZM2G157296	notassigned	2.57981e+18	428.508	8.00471e-14	3.24386e-13	0.0263545	0.067733	0.232521	1
SC	d1369.a1	GRMZM2G380457_P01*	Zm00001d051785	weakly similar to ( 161) AT4G01150 | Symbols: | unknown protein | chr4:493692-494379 FORWARDweakly similar to ( 187) loc_os02g49870 12002.m10021 protein expressed protein seq=cds; coord=4:166773457..166774717:1; parent_gene=GRMZM2G380457	Folding, sorting and degradation	2.56122e+18	29.477	0.00223514	0.00352027	0.908117	0.939372	0.795387	1
SC	c513.a1	GRMZM2G022180_P02	Zm00001d025305	highly similar to ( 652) AT5G61790 | Symbols: CNX1, ATCNX1 | calnexin 1 (CNX1) | chr5:24827394-24829642 REVERSEhighly similar to ( 667) CALX_SOYBN Calnexin homolog precursor - Glycine max (Soybean)highly similar to ( 764) loc_os04g32950 12004.m78935 protein calnexin homolog precursor, putative, expressed seq=cds; coord=10:112583884..112587345:-1; parent_gene=GRMZM2G022180	Signal transduction	2.40672e+18	34.2989	1.11022e-16	5.43557e-16	0.250991	0.376661	0.421798	1
SC	c755.a2	GRMZM5G890561_P01*	Zm00001d005642	weakly similar to ( 197) AT1G74270 | Symbols: | 60S ribosomal protein L35a (RPL35aC) | chr1:27928415-27929466 REVERSEmoderately similar to ( 215) loc_os02g54470 12002.m100389 protein 60S ribosomal protein L33-B, putative, expressed seq=cds; coord=2:176469816..176470792:-1; parent_gene=GRMZM5G890561	Translation	2.39815e+18	11.5394	0.000718061	0.00118798	0.786183	0.850917	0.848149	1
SC	c554.a1	GRMZM2G305115_P01*	Zm00001d038648	highly similar to ( 541) AT1G08450 | Symbols: CRT3 | CRT3 (CALRETICULIN 3); calcium ion binding / unfolded protein binding | chr1:2668008-2671800 REVERSEmoderately similar to ( 459) CALR_BETVU Calreticulin precursor - Beta vulgaris (Sugar beet)highly similar to ( 612) loc_os05g43170 12005.m08446 protein calreticulin-3 precursor, putative, expressed seq=cds; coord=6:157564314..157569386:1; parent_…	Signal transduction	2.19004e+18	9709.12	0.000113697	0.000207105	0.00979728	0.0309057	0.94233	1
SC	d1341.a1	GRMZM2G150485_P01*	Zm00001d010867	moderately similar to ( 406) AT3G12290 | Symbols: | tetrahydrofolate dehydrogenase/cyclohydrolase, putative | chr3:3919591-3921326 FORWARDmoderately similar to ( 453) loc_os05g05830 12005.m083615 protein C-1-tetrahydrofolate synthase, cytoplasmic, putative, expressed seq=cds; coord=8:127487910..127490125:1; parent_gene=GRMZM2G150485	Carbohydrate metabolism	1.93296e+18	167.228	7.05889e-11	2.23325e-10	0.520283	0.624977	0.699343	1
SC	c566.a1	GRMZM2G024482_P02	Zm00001d049351	moderately similar to ( 286) AT2G22230 | Symbols: | beta-hydroxyacyl-ACP dehydratase, putative | chr2:9450042-9451427 FORWARDmoderately similar to ( 315) loc_os08g12840 12008.m05411 protein 3-hydroxyacyl-[acyl-carrier protein] dehydratase/ catalytic, putative, expressed seq=cds; coord=4:26128851..26131595:1; parent_gene=GRMZM2G024482	Lipid metabolism	1.89888e+18	13.0023	4.97506e-09	1.37673e-08	0.0229171	0.0610746	0.320379	1
SC	c681.a1	GRMZM2G112176_P01*	Zm00001d003971	weakly similar to ( 166) AT2G43180 | Symbols: | catalytic | chr2:17953832-17955774 REVERSEvery weakly similar to (95.9) CPPM_DIACA Putative carboxyvinyl-carboxyphosphonate phosphorylmutase (EC 2.7.8.23) (Carboxyphosphonoenolpyruvate phosphonomutase) (CPEP phosphonomutase) (PSR132) - Dianthus caryophyllus (Carnation) (Clove pink)moderately similar to ( 219) loc_os04g31700 12004.m08270 protein meth…	Carbohydrate metabolism	1.81014e+18	25.7899	0	0	0.0394914	0.0902075	0.753444	1
SC	d1446.a1	GRMZM2G052100_P01	Zm00001d025401	seq=cds; coord=10:116057034..116058081:-1; parent_gene=GRMZM2G052100	notassigned	1.75694e+18	4.32977	0	0	0.996249	0.998094	0.971154	1
SC	c652.a2	GRMZM2G017045_P01	Zm00001d031850	weakly similar to ( 151) AT2G05620 | Symbols: PGR5 | PGR5 (proton gradient regulation 5); electron carrier | chr2:2081204-2081687 REVERSEweakly similar to ( 176) loc_os08g45190 12008.m08489 protein PGR5, putative, expressed seq=cds; coord=1:201625281..201626321:-1; parent_gene=GRMZM2G017045	Energy metabolism	1.64518e+18	15.2248	0.93871	0.947467	0.131439	0.233909	0.719019	1
SC	c409.a2	GRMZM2G456835_P01	Zm00001d011125	weakly similar to ( 143) AT3G17020 | Symbols: | universal stress protein (USP) family protein | chr3:5802728-5804063 REVERSEmoderately similar to ( 207) loc_os05g06500 12005.m05177 protein USP family protein, putative, expressed seq=cds; coord=8:135773274..135780035:1; parent_gene=GRMZM2G456835	Folding, sorting and degradation	1.59324e+18	5.72208	0	0	0.946004	0.964727	0.999999	1
SC	d1033.a1	GRMZM2G008892_P01	Zm00001d002993	very weakly similar to (99.0) AT2G01918 | Symbols: | calcium ion binding | chr2:424254-425678 REVERSEvery weakly similar to (83.2) PSBQ_SPIOL Oxygen-evolving enhancer protein 3, chloroplast precursor (OEE3) (16 kDa subunit of oxygen evolving system of photosystem II) (OEC 16 kDa subunit) - Spinacia oleracea (Spinach)weakly similar to ( 184) loc_os04g44200 12004.m09378 protein oxygen-evolving enha…	Energy metabolism	1.57505e+18	30.666	3.02644e-10	9.12147e-10	0.229426	0.351964	0.812417	1
SC	c625.a2	GRMZM2G024073_P01	Zm00001d037748	moderately similar to ( 227) AT4G29670 | Symbols: ACHT2 | thioredoxin family protein | chr4:14535983-14537108 REVERSEmoderately similar to ( 304) loc_os05g11090 12005.m27738 protein thioredoxin-like 6, chloroplast precursor, putative, expressed seq=cds; coord=6:132125969..132131340:1; parent_gene=GRMZM2G024073	Folding, sorting and degradation	1.55766e+18	12.1478	1.08472e-10	3.38233e-10	0.19276	0.316009	0.879711	1
SC	d1004.a1	GRMZM2G147671_P01*	Zm00001d047941	moderately similar to ( 376) AT4G38630 | Symbols: RPN10, MCB1, ATMCB1, MBP1 | RPN10 (REGULATORY PARTICLE NON-ATPASE 10); peptide receptor | chr4:18057357-18059459 REVERSEhighly similar to ( 521) loc_os03g13970 12003.m34816 protein 26S proteasome non-ATPase regulatory subunit 4, putative, expressed seq=cds; coord=1:32992225..32999478:-1; parent_gene=GRMZM2G165926	Folding, sorting and degradation	1.50697e+18	8.28855	0.0270747	0.0365728	0.444007	0.555393	0.168063	0.971918
SC	d1332.a1	GRMZM2G074589_P01	Zm00001d045675	highly similar to ( 948) AT5G65010 | Symbols: ASN2 | ASN2 (ASPARAGINE SYNTHETASE 2); asparagine synthase (glutamine-hydrolyzing) | chr5:25969224-25972278 FORWARDnearly identical (1050) ASNS_ORYSA Asparagine synthetase [glutamine-hydrolyzing] (EC 6.3.5.4) (Glutamine-dependent asparagine synthetase) - Oryza sativa (Rice)nearly identical (1052) loc_os06g15420 12006.m06255 protein asparagine syntheta…	AminoAcid metabolism	1.46016e+18	2586.85	0.0936094	0.117637	0.726359	0.801142	0.810236	1
SC	d1554.a1	GRMZM2G052088_P01	NA	highly similar to ( 664) AT3G28715 | Symbols: | H+-transporting two-sector ATPase, putative | chr3:10778025-10780350 FORWARDhighly similar to ( 706) VA0D_ORYSA Probable vacuolar ATP synthase subunit d (EC 3.6.3.14) (V-ATPase d subunit) (Vacuolar proton pump subunit d) - Oryza sativa (Rice)highly similar to ( 706) loc_os01g40470 12001.m10318 protein vacuolar ATP synthase subunit d, putative, expre…	Membrane transport	1.45888e+18	30.6639	3.73708e-11	1.20702e-10	0.111377	0.205648	0.404814	1
SC	c204.a3	GRMZM2G444178_P01	NA	NA	NA	1.41612e+18	56.9346	2.9976e-14	1.27192e-13	0.533364	0.638385	0.736312	1
SC	d1537.a1	GRMZM2G122139_P01	Zm00001d034245	highly similar to ( 710) AT1G75210 | Symbols: | 5 nucleotidase family protein | chr1:28223990-28228751 FORWARDhighly similar to ( 934) loc_os03g56310 12003.m101134 protein cytosolic purine 5-nucleotidase, putative, expressed seq=cds; coord=1:282667704..282685087:-1; parent_gene=GRMZM2G122139	Folding, sorting and degradation	1.41319e+18	16.606	0.357437	0.400774	0.0437428	0.0980678	0.467402	1
SC	d1317.a2	GRMZM2G103617_P02	Zm00001d019358	weakly similar to ( 129) AT3G48140 | Symbols: | senescence-associated protein, putative | chr3:17778471-17779299 FORWARDweakly similar to ( 143) loc_os07g17330 12007.m06174 protein B12D protein, expressed seq=cds; coord=7:28399052..28399882:1; parent_gene=GRMZM2G103617	Signaling molecules and interactions	1.38328e+18	3348.35	9.10431e-05	0.000168104	0.42432	0.5395	0.0117984	0.303949
SC	c245.a5	GRMZM2G071790_P01*	Zm00001d043158	highly similar to ( 836) AT5G12250 | Symbols: TUB6 | TUB6 (BETA-6 TUBULIN); structural constituent of cytoskeleton | chr5:3961317-3962971 REVERSEhighly similar to ( 846) TBB6_MAIZE Tubulin beta-6 chain (Beta-6 tubulin) - Zea mays (Maize)highly similar to ( 846) loc_os01g59150 12001.m42736 protein tubulin beta-4 chain, putative, expressed seq=cds; coord=3:187441519..187444944:-1; parent_gene=GRMZM…	Cell motility	1.3751e+18	10.8096	0.507041	0.549168	1.20093e-12	2.24035e-11	0.0464662	0.586395
SC	c794.a2	GRMZM2G134107_P01	Zm00001d047500	weakly similar to ( 150) AT3G05560 | Symbols: | 60S ribosomal protein L22-2 (RPL22B) | chr3:1614641-1615204 FORWARDweakly similar to ( 162) loc_os03g22340 12003.m07636 protein 60S ribosomal protein L22-2, putative, expressed seq=cds; coord=9:130498884..130500159:1; parent_gene=GRMZM2G134107	Translation	1.36273e+18	77.4101	0.0002156	0.000380553	0.143821	0.251671	0.0280918	0.46937
SC	c670.a2	GRMZM2G343636_P01	Zm00001d037078	moderately similar to ( 230) AT4G31530 | Symbols: | binding / catalytic | chr4:15282281-15284064 FORWARDmoderately similar to ( 244) loc_os03g23980 12003.m07744 protein 3-beta hydroxysteroid dehydrogenase/isomerase family protein, putative, expressed seq=cds; coord=6:106906026..106912138:-1; parent_gene=GRMZM2G343636	Signal transduction	1.34058e+18	775.799	0.898556	0.912899	6.14193e-11	9.10352e-10	0.988224	1
SC	d1162.a1	GRMZM2G140867_P01*	Zm00001d035915	moderately similar to ( 457) AT3G27430 | Symbols: PBB1 | PBB1; endopeptidase/ peptidase/ threonine-type endopeptidase | chr3:10152910-10155052 FORWARDweakly similar to ( 110) PSB6_TOBAC Proteasome subunit beta type 6 precursor (EC 3.4.25.1) (Proteasome delta chain) (Tobacco cryptogein-induced protein 7) (tcI 7) - Nicotiana tabacum (Common tobacco)moderately similar to ( 486) loc_os05g09490 12005.…	Folding, sorting and degradation	1.2811e+18	102.081	1.53416e-07	3.72189e-07	0.986396	0.993403	0.984407	1
SC	d1171.a1	GRMZM2G152258_P01	Zm00001d007687	moderately similar to ( 235) AT5G06060 | Symbols: | tropinone reductase, putative / tropine dehydrogenase, putative | chr5:1824066-1825833 REVERSEvery weakly similar to (93.2) FABG4_BRANA 3-oxoacyl-[acyl-carrier-protein] reductase 4 (EC 1.1.1.100) (3-ketoacyl-acyl carrier protein reductase 4) (Fragment) - Brassica napus (Rape)moderately similar to ( 281) loc_os11g43360 12011.m08171 protein tropin…	misc	1.26542e+18	877.955	2.61817e-09	7.37724e-09	1.99086e-10	2.72672e-09	0.926078	1
SC	c245.a4	GRMZM2G066191_P01*	Zm00001d013612	highly similar to ( 806) AT5G23860 | Symbols: TUB8 | TUB8; structural constituent of cytoskeleton | chr5:8042962-8044528 FORWARDhighly similar to ( 852) TBB3_MAIZE Tubulin beta-3 chain (Beta-3 tubulin) - Zea mays (Maize)highly similar to ( 828) loc_os03g45920 12003.m09615 protein tubulin beta-8 chain, putative, expressed seq=cds; coord=1:258551317..258555202:-1; parent_gene=GRMZM2G108766	Cell motility	1.2518e+18	9.70064	0.186013	0.221903	2.65787e-13	5.22876e-12	0.0156023	0.359184
SC	c717.a1	AC197246.3_FGP003*	Zm00001d031560	moderately similar to ( 207) AT4G18100 | Symbols: | 60S ribosomal protein L32 (RPL32A) | chr4:10035715-10036475 REVERSEmoderately similar to ( 236) loc_os08g41300 12008.m08108 protein 60S ribosomal protein L32, putative, expressed seq=cds; coord=4:43055747..43058067:1; parent_gene=GRMZM2G155931	Translation	1.2421e+18	102.409	2.40133e-11	7.9457e-11	0.99384	0.996603	0.880493	1
SC	c726.a3	GRMZM2G152466_P01*	Zm00001d013367	highly similar to ( 825) AT4G14960 | Symbols: TUA6 | TUA6; structural constituent of cytoskeleton | chr4:8548769-8550319 REVERSEhighly similar to ( 840) TBA2_MAIZE Tubulin alpha-2 chain (Alpha-2 tubulin) - Zea mays (Maize)highly similar to ( 830) loc_os11g14220 12011.m28666 protein tubulin alpha-3 chain, putative, expressed seq=cds; coord=1:271106011..271110409:1; parent_gene=GRMZM2G153292	Cell motility	1.22034e+18	39164.2	0	0	0.183814	0.306924	0.184832	0.994451
SC	d1274.a1	GRMZM2G109121_P02*	Zm00001d029044	nearly identical (1123) AT4G19210 | Symbols: ATRLI2, RLI2 | ATRLI2; transporter | chr4:10501906-10504776 FORWARDvery weakly similar to (85.1) CYSA_CHLVU Probable sulfate/thiosulfate import ATP-binding protein cysA (EC 3.6.3.25) (Sulfate-transporting ATPase) - Chlorella vulgaris (Green alga)nearly identical (1187) loc_os11g34350 12011.m07293 protein ATP-binding cassette sub-family E member 1, puta…	Transcription	1.21409e+18	357.327	0.0184933	0.0255558	0.171542	0.291089	0.0693374	0.653899
SC	c208.a5	GRMZM2G061928_P01*	Zm00001d002889	moderately similar to ( 370) AT2G46860 | Symbols: AtPPa3 | AtPPa3 (Arabidopsis thaliana pyrophosphorylase 3); inorganic diphosphatase/ pyrophosphatase | chr2:19253843-19255060 FORWARDmoderately similar to ( 429) IPYR_MAIZE Soluble inorganic pyrophosphatase (EC 3.6.1.1) (Pyrophosphate phospho-hydrolase) (PPase) - Zea mays (Maize)moderately similar to ( 409) loc_os04g59040 12004.m101703 protein sol…	Nucleotide metabolism	1.17481e+18	15.4885	0.00241738	0.00377977	0.787129	0.850917	0.973917	1
SC	d1011.a1	GRMZM2G169182_P01*	Zm00001d039916	moderately similar to ( 254) AT2G01190 | Symbols: | octicosapeptide/Phox/Bem1p (PB1) domain-containing protein | chr2:115023-117296 FORWARDhighly similar to ( 695) loc_os01g04650 12001.m07100 protein PB1 domain containing protein, expressed seq=cds; coord=3:19924648..19927549:1; parent_gene=GRMZM2G169182	notassigned	1.16508e+18	94.2559	0.00119506	0.00193282	0.218308	0.341986	0.154309	0.922447
SC	d1068.a2	GRMZM2G008623_P01	Zm00001d007038	moderately similar to ( 417) AT2G27020 | Symbols: PAG1 | PAG1; endopeptidase/ peptidase/ threonine-type endopeptidase | chr2:11528515-11530858 REVERSEmoderately similar to ( 451) PSA3_ORYSA Proteasome subunit alpha type 3 (EC 3.4.25.1) (20S proteasome alpha subunit G) (20S proteasome subunit alpha-7) - Oryza sativa (Rice)moderately similar to ( 451) loc_os01g59600 12001.m43238 protein proteasome …	Folding, sorting and degradation	1.15113e+18	138.253	9.2166e-09	2.46841e-08	0.373918	0.497026	0.20001	1
SC	c566.a2	GRMZM2G055667_P01	Zm00001d010180	moderately similar to ( 282) AT2G22230 | Symbols: | beta-hydroxyacyl-ACP dehydratase, putative | chr2:9450042-9451427 FORWARDmoderately similar to ( 344) loc_os05g36000 12005.m27841 protein beta-hydroxyacyl-ACP dehydratase, putative, expressed seq=cds; coord=8:101237177..101240478:-1; parent_gene=GRMZM2G055667	Lipid metabolism	1.12545e+18	9.27173	4.90217e-05	9.2568e-05	0.0757987	0.153387	0.0646667	0.642052
SC	c360.a2	GRMZM2G116689_P01*	Zm00001d020511	moderately similar to ( 296) AT1G31340 | Symbols: RUB1, NEDD8, ATRUB1 | RUB1 (RELATED TO UBIQUITIN 1); protein binding | chr1:11218076-11219417 REVERSEweakly similar to ( 152) RUB1_ORYSA NEDD8-like protein RUB1 precursor (Ubiquitin-related protein 1) (OsRUB1) - Oryza sativa (Rice)moderately similar to ( 298) loc_os09g25320 12009.m05684 protein polyubiquitin 2, putative, expressed seq=cds; coord=7…	Folding, sorting and degradation	1.06033e+18	6.62653	1.27323e-07	3.13098e-07	0.0999814	0.188913	0.299456	1
SC	c627.a3	GRMZM2G045303_P01	Zm00001d049357	highly similar to ( 919) AT2G32730 | Symbols: | 26S proteasome regulatory subunit, putative | chr2:13880189-13885464 FORWARDnearly identical (1022) loc_os08g12820 12008.m26623 protein 26S proteasome non-ATPase regulatory subunit 1, putative, expressed seq=cds; coord=4:26180433..26183660:-1; parent_gene=GRMZM2G045303	Folding, sorting and degradation	1.04678e+18	14.7932	0.416359	0.458291	0.706534	0.783268	0.284847	1
SC	c968.a2	GRMZM2G088397_P01	Zm00001d044090	moderately similar to ( 311) AT1G26160 | Symbols: | metal-dependent phosphohydrolase HD domain-containing protein | chr1:9044784-9046945 REVERSEmoderately similar to ( 358) loc_os01g45390 12001.m43110 protein HD domain containing protein, expressed seq=cds; coord=3:215207099..215211653:-1; parent_gene=GRMZM2G088397	notassigned	9.78529e+17	17.9957	0.332131	0.377485	0.0504164	0.109981	0.805429	1
SC	d1488.a1	GRMZM2G042034_P03*	NA	moderately similar to ( 288) AT5G11770 | Symbols: | NADH-ubiquinone oxidoreductase 20 kDa subunit, mitochondrial | chr5:3791148-3792929 REVERSEmoderately similar to ( 291) NDUS7_BRAOL NADH-ubiquinone oxidoreductase 20 kDa subunit, mitochondrial precursor (EC 1.6.5.3) (EC 1.6.99.3) (Complex I-20kD) (CI-20kD) - Brassica oleracea (Wild cabbage)moderately similar to ( 296) loc_os01g52214 12001.m11395…	Energy metabolism	9.69221e+17	4.7265	0.000232009	0.000407522	0.143289	0.251279	0.870167	1
SC	c208.a6	GRMZM2G026470_P02	Zm00001d010171	weakly similar to ( 199) AT2G46860 | Symbols: AtPPa3 | AtPPa3 (Arabidopsis thaliana pyrophosphorylase 3); inorganic diphosphatase/ pyrophosphatase | chr2:19253843-19255060 FORWARDmoderately similar to ( 207) IPYR_MAIZE Soluble inorganic pyrophosphatase (EC 3.6.1.1) (Pyrophosphate phospho-hydrolase) (PPase) - Zea mays (Maize)moderately similar to ( 210) loc_os05g36260 12005.m07857 protein soluble …	Nucleotide metabolism	9.3149e+17	21.4133	0.311384	0.355773	0.0905117	0.17614	0.482374	1
SC	c204.a2	GRMZM2G006128_P02	NA	NA	NA	9.01046e+17	108.294	0	0	4.73308e-08	4.78616e-07	0.668378	1
SC	c755.a1	GRMZM2G177098_P03	Zm00001d045054	weakly similar to ( 197) AT1G74270 | Symbols: | 60S ribosomal protein L35a (RPL35aC) | chr1:27928415-27929466 REVERSEmoderately similar to ( 216) loc_os02g54470 12002.m100389 protein 60S ribosomal protein L33-B, putative, expressed seq=cds; coord=9:11741082..11743899:1; parent_gene=GRMZM2G177098	Translation	8.32771e+17	14.9214	1.66822e-12	5.97687e-12	0.0707565	0.144997	0.344053	1
SC	c942.a1	GRMZM2G042789_P01	Zm00001d011079	very weakly similar to (93.2) loc_os12g25090 12012.m56494 protein expressed protein seq=cds; coord=8:134378213..134378743:1; parent_gene=GRMZM2G042789	notassigned	8.08235e+17	123.244	0.381798	0.423697	9.82911e-05	0.000565697	0.495443	1
SC	b58.a4	GRMZM2G009808_P01	Zm00001d048358	nearly identical (1164) AT2G05710 | Symbols: | aconitate hydratase, cytoplasmic, putative / citrate hydro-lyase/aconitase, putative | chr2:2141591-2146350 FORWARDnearly identical (1180) ACOC_ORYSA Putative aconitate hydratase, cytoplasmic (EC 4.2.1.3) (Citrate hydro-lyase) (Aconitase) - Oryza sativa (Rice)nearly identical (1290) loc_os03g04410 12003.m05971 protein aconitate hydratase, cytoplasmic…	Carbohydrate metabolism	7.91636e+17	80.7633	0	0	6.96251e-10	8.7598e-09	0.700287	1
SC	c609.a3	GRMZM2G126594_P02	Zm00001d037732	moderately similar to ( 290) AT1G67430 | Symbols: | 60S ribosomal protein L17 (RPL17B) | chr1:25262209-25263627 FORWARDmoderately similar to ( 320) RL17_MAIZE 60S ribosomal protein L17 - Zea mays (Maize)moderately similar to ( 320) loc_os09g08430 12009.m04110 protein 60S ribosomal protein L17, putative, expressed seq=cds; coord=6:131423962..131426896:1; parent_gene=GRMZM2G126594	Translation	7.85129e+17	99.0133	0.00217487	0.00343535	0.766802	0.833012	0.851487	1
SC	c731.a1	AC233922.1_FGP003	NA	NA	NA	7.40221e+17	2920.65	0	0	0.0586518	0.125666	0.287612	1
SC	d1146.a1	GRMZM2G043383_P01*	Zm00001d018694	highly similar to ( 921) AT1G24510 | Symbols: | T-complex protein 1 epsilon subunit, putative / TCP-1-epsilon, putative / chaperonin, putative | chr1:8685504-8687660 REVERSEhighly similar to ( 936) TCPE1_AVESA T-complex protein 1 subunit epsilon (TCP-1-epsilon) (CCT-epsilon) (TCP-K19) - Avena sativa (Oat)highly similar to ( 978) loc_os06g36700 12006.m08205 protein T-complex protein 1 subunit epsi…	Folding, sorting and degradation	7.22062e+17	84.3888	0	0	0.306825	0.436247	0.295603	1
SC	d1241.a1	GRMZM2G128171_P02*	Zm00001d040766	highly similar to ( 506) AT2G47470 | Symbols: ATPDIL2-1, UNE5, MEE30, PDI11, ATPDI11 | UNE5 (UNFERTILIZED EMBRYO SAC 5); protein disulfide isomerase | chr2:19481503-19483683 FORWARDhighly similar to ( 509) PDIA6_MEDSA Probable protein disulfide-isomerase A6 precursor (EC 5.3.4.1) (P5) - Medicago sativa (Alfalfa)highly similar to ( 577) loc_os01g23740 12001.m43001 protein OsPDIL2-2 - Oryza sativa …	Folding, sorting and degradation	7.15828e+17	4.13413	0.000437669	0.000737629	0.299947	0.428759	0.633262	1
SC	d1386.a1	GRMZM2G392791_P01	Zm00001d031203	moderately similar to ( 337) AT3G51000 | Symbols: | epoxide hydrolase, putative | chr3:18945258-18946499 REVERSEmoderately similar to ( 468) loc_os12g43970 12012.m08168 protein epoxide hydrolase 2, putative, expressed seq=cds; coord=1:179988453..179990792:-1; parent_gene=GRMZM2G392791	misc	7.10778e+17	123161	1.05277e-05	2.12519e-05	9.29426e-07	7.73568e-06	0.00255741	0.131767
SC	d1367.a1	GRMZM2G098153_P01	Zm00001d011100	moderately similar to ( 368) AT2G39990 | Symbols: EIF2 | EIF2; translation initiation factor | chr2:16698332-16699929 REVERSEmoderately similar to ( 443) loc_os05g01450 12005.m27663 protein eukaryotic translation initiation factor 3 subunit 5, putative, expressed seq=cds; coord=8:135062540..135065340:1; parent_gene=GRMZM2G098153	Folding, sorting and degradation	7.03082e+17	47.4955	0.0216775	0.0295404	0.920144	0.945485	0.968078	1
SC	c299.a2	GRMZM2G042146_P01	Zm00001d037727	moderately similar to ( 473) AT5G19760 | Symbols: | dicarboxylate/tricarboxylate carrier (DTC) | chr5:6679591-6681845 REVERSEhighly similar to ( 527) loc_os05g11780 12005.m05647 protein mitochondrial 2-oxoglutarate/malate carrier protein, putative, expressed seq=cds; coord=6:131211504..131215322:-1; parent_gene=GRMZM2G042146	Membrane transport	6.4248e+17	10.1672	0	0	0.0460782	0.101541	0.308812	1
SC	c827.a2	GRMZM2G026969_P01	Zm00001d012173	moderately similar to ( 432) AT2G31390 | Symbols: | pfkB-type carbohydrate kinase family protein | chr2:13383635-13386116 REVERSEhighly similar to ( 555) SCRK1_MAIZE Fructokinase-1 (EC 2.7.1.4) (ZmFRK1) - Zea mays (Maize)highly similar to ( 526) loc_os01g66940 12001.m12799 protein fructokinase-1, putative, expressed seq=cds; coord=8:164518227..164526511:1; parent_gene=GRMZM2G026969	Carbohydrate metabolism	6.21059e+17	5.33674	0	0	0.00283536	0.0108789	0.0766303	0.687152
SC	c636.a2	AC234091.1_FGP001	NA	highly similar to ( 786) AT1G78060 | Symbols: | glycosyl hydrolase family 3 protein | chr1:29349796-29352868 REVERSEmoderately similar to ( 347) XYNB_PRUPE Putative beta-D-xylosidase (EC 3.2.1.-) (PpAz152) (Fragment) - Prunus persica (Peach)nearly identical (1156) loc_os11g18730 12011.m05948 protein beta-D-xylosidase, putative, expressed seq=cds; coord=2:118690836..118694231:-1; parent_gene=AC234…	Carbohydrate metabolism	5.99124e+17	21.5833	0	0	0.200246	0.324351	0.425241	1
SC	d1334.a1	GRMZM5G830210_P01	NA	weakly similar to ( 186) IF1C_MAIZE Translation initiation factor IF-1, chloroplast - Zea mays (Maize)weakly similar to ( 179) loc_osp1g00690 11562.m00060 protein translation initiation factor 1 seq=cds; coord=Pt:78085..78408:-1; parent_gene=GRMZM5G830210	Translation	5.84701e+17	89.2546	7.00604e-07	1.59255e-06	0.155801	0.269722	0.647136	1
SC	c793.a2	GRMZM2G112488_P01	Zm00001d028816	weakly similar to ( 169) PR1_ASPOF Pathogenesis-related protein 1 (AOPR1) - Asparagus officinalis (Garden asparagus)moderately similar to ( 279) loc_os03g18850 12003.m07305 protein pathogenesis-related protein 1, putative, expressed seq=cds; coord=1:47177906..47178782:1; parent_gene=GRMZM2G112488	Environmental adaptation	5.74387e+17	1.9638e+06	0	0	0.17164	0.291089	0.901886	1
SC	c920.a1	GRMZM2G056462_P01	Zm00001d029048	moderately similar to ( 351) AT5G20920 | Symbols: EIF2 BETA | EIF2 BETA; translation initiation factor | chr5:7094994-7096661 REVERSEmoderately similar to ( 439) IF2B_WHEAT Eukaryotic translation initiation factor 2 subunit beta (eIF-2-beta) (P38) - Triticum aestivum (Wheat)moderately similar to ( 453) loc_os03g21550 12003.m34859 protein eukaryotic translation initiation factor 2 beta subunit, pu…	Translation	5.51908e+17	15.7763	1.89358e-08	4.9609e-08	0.97199	0.98644	0.685197	1
SC	d1110.a1	GRMZM2G061932_P01	Zm00001d008730	weakly similar to ( 113) AT5G62200 | Symbols: | embryo-specific protein-related | chr5:24984463-24985674 REVERSEweakly similar to ( 187) loc_os01g07780 12001.m07405 protein lipase/lipooxygenase, PLAT/LH2, putative, expressed seq=cds; coord=8:17420296..17421579:1; parent_gene=GRMZM2G061932	Signaling molecules and interactions	5.41814e+17	5629.05	0	0	4.13397e-07	3.60722e-06	0.0071688	0.228136
SC	d1796.a1	AC226235.2_FGP001	Zm00001d040173	moderately similar to ( 376) AT1G75280 | Symbols: | isoflavone reductase, putative | chr1:28252030-28253355 FORWARDhighly similar to ( 594) IFRH_MAIZE Isoflavone reductase homolog IRL (EC 1.3.1.-) - Zea mays (Maize)moderately similar to ( 423) loc_os01g01660 12001.m06810 protein isoflavone reductase homolog IRL, putative, expressed seq=cds; coord=3:30996380..30997528:1; parent_gene=AC226235.2_FG0…	Biosynthesis of other secondary metabolites	5.24574e+17	97.4679	0.143381	0.174313	1.15399e-07	1.08576e-06	0.000491438	0.0443113
SC	c577.a2	GRMZM2G111954_P02*	Zm00001d003086	highly similar to ( 508) AT1G06690 | Symbols: | aldo/keto reductase family protein | chr1:2049742-2052039 REVERSEvery weakly similar to (85.1) A115_TOBAC Auxin-induced protein PCNT115 - Nicotiana tabacum (Common tobacco)highly similar to ( 633) loc_os07g04990 12007.m079602 protein aldo-keto reductase/ oxidoreductase, putative, expressed seq=cds; coord=2:30360497..30366496:-1; parent_gene=GRMZM2G1…	Carbohydrate metabolism	5.23871e+17	96.9255	6.62602e-05	0.00012361	3.24594e-11	4.94662e-10	0.804999	1
SC	c915.a1	GRMZM2G029543_P01*	Zm00001d028787	highly similar to ( 504) AT2G30200 | Symbols: | binding / catalytic/ transferase | chr2:12883340-12885482 REVERSEhighly similar to ( 539) loc_os03g18590 12003.m07281 protein malonyl CoA-acyl carrier protein transacylase, mitochondrial precursor, putative, expressed seq=cds; coord=1:46134914..46138905:-1; parent_gene=GRMZM2G029543	Lipid metabolism	5.14829e+17	87.795	0.040572	0.053355	0.349785	0.475462	0.827008	1
SC	d1494.a1	GRMZM2G095955_P01	NA	moderately similar to ( 382) AT1G78680 | Symbols: ATGGH2 | ATGGH2 (gamma-glutamyl hydrolase 2); omega peptidase | chr1:29593933-29596037 FORWARDmoderately similar to ( 322) GGH_SOYBN Gamma-glutamyl hydrolase precursor (EC 3.4.19.9) (Gamma-Glu-X carboxypeptidase) (Conjugase) (GH) - Glycine max (Soybean)highly similar to ( 513) loc_os05g44130 12005.m27626 protein gamma-glutamyl hydrolase precursor,…	Folding, sorting and degradation	5.03687e+17	282.161	7.1199e-10	2.10484e-09	0.00146987	0.00633625	0.0314851	0.476542
SC	c522.a2	GRMZM2G055507_P01	Zm00001d052472	highly similar to ( 754) AT1G18500 | Symbols: MAML-4, IPMS1 | MAML-4 (METHYLTHIOALKYLMALATE SYNTHASE-LIKE 4); 2-isopropylmalate synthase | chr1:6369347-6372861 FORWARDhighly similar to ( 624) LEU1_SOYBN Probable 2-isopropylmalate synthase (EC 2.3.3.13) (Alpha-isopropylmalate synthase) (Alpha-IPM synthetase) (Late nodulin 56) (N-56) - Glycine max (Soybean)highly similar to ( 981) loc_os12g04440 12…	AminoAcid metabolism	4.79803e+17	78.525	3.23608e-11	1.05784e-10	0.225739	0.347999	0.785452	1
SC	d1031.a1	GRMZM2G320099_P01	Zm00001d027367	moderately similar to ( 372) AT4G20960 | Symbols: | cytidine/deoxycytidylate deaminase family protein | chr4:11212077-11213530 FORWARDhighly similar to ( 587) loc_os03g02600 12003.m34720 protein riboflavin biosynthesis protein ribD, putative, expressed seq=cds; coord=1:3710503..3713113:1; parent_gene=GRMZM2G320099	Nucleotide metabolism	4.74597e+17	36.7793	3.95527e-08	1.00934e-07	9.95708e-11	1.39916e-09	0.535118	1
SC	d1134.a1	GRMZM2G169005_P01*	Zm00001d025923	weakly similar to ( 133) AT2G24190 | Symbols: | short-chain dehydrogenase/reductase (SDR) family protein | chr2:10283740-10284934 REVERSEmoderately similar to ( 215) loc_os04g44980 12004.m09452 protein carbonyl reductase 3, putative, expressed seq=cds; coord=10:132612020..132613415:1; parent_gene=GRMZM2G169005	misc	4.17333e+17	3952.44	1.75212e-07	4.22226e-07	0	0	0.684396	1
SC	c423.a2	GRMZM2G459373_P01	Zm00001d011328	moderately similar to ( 344) AT5G20010 | Symbols: RAN-1, RAN1, ATRAN1 | RAN-1; GTP binding / GTPase/ protein binding | chr5:6760364-6761747 FORWARDmoderately similar to ( 343) RANB1_TOBAC GTP-binding nuclear protein Ran-B1 - Nicotiana tabacum (Common tobacco)moderately similar to ( 350) loc_os01g42530 12001.m10517 protein GTP-binding nuclear protein Ran-2, putative, expressed seq=cds; coord=8:142…	Signal transduction	4.14106e+17	1485.15	0.161107	0.194334	0.0852224	0.168268	0.760534	1
SC	d1492.a1	GRMZM2G447785_P01*	Zm00001d003306	weakly similar to ( 119) IBBR_ORYSA Bowman-Birk type bran trypsin inhibitor precursor (Protein RBBI3-3) (RBTI) (OSE727A) - Oryza sativa (Rice)weakly similar to ( 140) loc_os01g03320 12001.m06971 protein Bowman-Birk type bran trypsin inhibitor precursor, putative, expressed seq=cds; coord=2:38082457..38083682:-1; parent_gene=GRMZM2G447785	notassigned	4.08264e+17	14.5582	1.74615e-10	5.36742e-10	0.00165088	0.0070049	0.615975	1
SC	d1771.a1	GRMZM2G054267_P01	Zm00001d019057	weakly similar to ( 159) AT3G23760 | Symbols: | FUNCTIONS IN: molecular_function unknown; INVOLVED IN: biological_process unknown; LOCATED IN: vacuole; EXPRESSED IN: 20 plant structures; EXPRESSED DURING: 13 growth stages; BEST Arabidopsis thaliana protein match is: transferase, transferring glycosyl groups (TAIR:AT4G14100.1); Has 63 Blast hits to 60 proteins in 11 species: Archae - 0; Bacteria -…	notassigned	3.88028e+17	158.57	0.00783193	0.0115452	0.00556113	0.0191629	0.896663	1
SC	c620.a2	GRMZM2G126763_P01	Zm00001d048354	weakly similar to ( 156) AT2G47730 | Symbols: ATGSTF8, ATGSTF5, GST6, GSTF8 | ATGSTF8 (ARABIDOPSIS THALIANA GLUTATHIONE S-TRANSFERASE PHI 8); glutathione binding / glutathione transferase | chr2:19558213-19559266 FORWARDweakly similar to ( 134) GSTF1_TOBAC Glutathione S-transferase PARB (EC 2.5.1.18) (GST class-phi) - Nicotiana tabacum (Common tobacco)moderately similar to ( 383) loc_os03g04250 1…	misc	3.67361e+17	20.4773	0.630506	0.664272	0.31395	0.441735	0.596479	1
SC	d1442.a1	GRMZM2G056081_P01	Zm00001d022043	moderately similar to ( 451) AT5G39410 | Symbols: | binding / catalytic | chr5:15768415-15770274 REVERSEhighly similar to ( 560) loc_os07g40620 12007.m08302 protein saccharopine dehydrogenase, putative, expressed seq=cds; coord=7:163046603..163052552:1; parent_gene=GRMZM2G056081	notassigned	3.61032e+17	726.697	1.20085e-06	2.66801e-06	0.370514	0.493714	0.474567	1
SC	c792.a1	GRMZM2G170397_P01*	Zm00001d018892	moderately similar to ( 259) AT3G56070 | Symbols: ROC2 | ROC2 (ROTAMASE CYCLOPHILIN 2); cyclosporin A binding / peptidyl-prolyl cis-trans isomerase | chr3:20806987-20807517 REVERSEmoderately similar to ( 250) CYPH_CATRO Peptidyl-prolyl cis-trans isomerase (EC 5.2.1.8) (PPIase) (Rotamase) (Cyclophilin) (Cyclosporin A-binding protein) - Catharanthus roseus (Rosy periwinkle) (Madagascar periwinkle)m…	Cell growth and death	3.46282e+17	48448.8	4.46532e-13	1.73171e-12	0.000534628	0.00260571	0.269399	1
SC	c929.a1	GRMZM2G169095_P01	Zm00001d007422	highly similar to ( 894) AT4G36760 | Symbols: ATAPP1, APP1 | ATAPP1; N-1-naphthylphthalamic acid binding / aminopeptidase | chr4:17326688-17329979 FORWARDnearly identical (1110) loc_os11g33330 12011.m07232 protein xaa-Pro aminopeptidase 1, putative, expressed seq=cds; coord=2:224332394..224344331:1; parent_gene=GRMZM2G169095	Folding, sorting and degradation	3.36179e+17	191.547	0.000170889	0.000303616	0.00332064	0.0123469	0.979972	1
SC	c731.a2	GRMZM2G350397_P01	NA	NA	NA	3.30291e+17	0.927217	0	0	0.00256567	0.0100948	0.0555225	0.607436
SC	d1125.a1	GRMZM2G010960_P01	Zm00001d037252	moderately similar to ( 253) AT1G10200 | Symbols: WLIM1 | WLIM1; transcription factor/ zinc ion binding | chr1:3346677-3347763 REVERSEmoderately similar to ( 229) SF3_HELAN Pollen-specific protein SF3 - Helianthus annuus (Common sunflower)nearly identical (1106) loc_os06g13030 12006.m32250 protein LIM domain containing protein, expressed seq=cds; coord=6:114177100..114187293:-1; parent_gene=GRMZM…	Signaling molecules and interactions	3.01264e+17	2.33592	0.000153435	0.000275318	0.36634	0.491787	0.993783	1
SC	d1935.a1	GRMZM2G178645_P01	Zm00001d047436	moderately similar to ( 343) AT5G40010 | Symbols: AATP1 | AATP1 (AAA-ATPase 1); ATP binding / ATPase/ nucleoside-triphosphatase/ nucleotide binding | chr5:16020218-16021762 REVERSEmoderately similar to ( 447) loc_os03g58790 12003.m10782 protein ATPase 3, putative, expressed seq=cds; coord=9:127695710..127697453:-1; parent_gene=GRMZM2G178645	Folding, sorting and degradation	3.00276e+17	1161.73	0.984527	0.98754	0.675034	0.765604	0.64164	1
SC	d1255.a2	GRMZM2G077316_P01	Zm00001d029594	moderately similar to ( 236) AT3G25780 | Symbols: AOC3 | AOC3 (ALLENE OXIDE CYCLASE 3); allene-oxide cyclase | chr3:9409362-9410409 FORWARDmoderately similar to ( 349) loc_os03g32314 12003.m08473 protein allene oxide cyclase 4, chloroplast precursor, putative, expressed seq=cds; coord=1:76732179..76733770:-1; parent_gene=GRMZM2G077316	Chemical structure transformation maps	2.97973e+17	16.3599	2.79149e-06	5.94565e-06	0.000150332	0.00083845	0.143638	0.905386
SC	d1184.a2	GRMZM5G883741_P01	Zm00001d017522	moderately similar to ( 398) AT4G20850 | Symbols: TPP2 | TPP2 (TRIPEPTIDYL PEPTIDASE II); tripeptidyl-peptidase | chr4:11160935-11169889 REVERSEhighly similar to ( 523) loc_os02g44520 12002.m09492 protein tripeptidyl-peptidase 2, putative, expressed seq=cds; coord=5:193174093..193205154:1; parent_gene=GRMZM5G883741	Folding, sorting and degradation	2.9278e+17	523.151	0.0565532	0.073107	0.00338198	0.0125318	0.76355	1
SC	d1005.a1	GRMZM2G157443_P01*	Zm00001d049674	very weakly similar to (90.1) AT5G24510 | Symbols: | 60s acidic ribosomal protein P1, putative | chr5:8369295-8369866 REVERSEweakly similar to ( 119) RLA1_MAIZE 60S acidic ribosomal protein P1 (L12) - Zea mays (Maize)very weakly similar to (98.2) loc_os08g02340 12008.m080029 protein 60S acidic ribosomal protein P1, putative, expressed seq=cds; coord=4:37937172..37938595:-1; parent_gene=GRMZM2G157…	Translation	2.91259e+17	516.51	0.565111	0.603008	7.8439e-11	1.14691e-09	0.439832	1
SC	d1108.a1	GRMZM2G133213_P01	Zm00001d043098	moderately similar to ( 422) AT5G17770 | Symbols: ATCBR, CBR1 | ATCBR (ARABIDOPSIS THALIANA NADH:CYTOCHROME B5 REDUCTASE 1); cytochrome-b5 reductase | chr5:5864543-5866495 REVERSEweakly similar to ( 194) NIA1_ORYSA Nitrate reductase [NADH] 1 (EC 1.7.1.1) (NR1) - Oryza sativa (Rice)moderately similar to ( 495) loc_os01g59930 12001.m12127 protein NADH-cytochrome b5 reductase, putative, expressed se…	Energy metabolism	2.90364e+17	18.9566	0.00757203	0.0111773	0.47107	0.579202	0.142682	0.905386
SC	c114.a5	GRMZM2G095126_P01	Zm00001d032608	highly similar to ( 543) AT5G08380 | Symbols: AtAGAL1 | AtAGAL1 (Arabidopsis thaliana ALPHA-GALACTOSIDASE 1); alpha-galactosidase/ catalytic/ hydrolase, hydrolyzing O-glycosyl compounds | chr5:2694851-2697616 REVERSEmoderately similar to ( 496) AGAL_ORYSA Alpha-galactosidase precursor (EC 3.2.1.22) (Melibiase) (Alpha-D-galactoside galactohydrolase) - Oryza sativa (Rice)highly similar to ( 697) lo…	Carbohydrate metabolism	2.83341e+17	29.8241	0	0	0.00132043	0.00583145	0.0643173	0.642052
SC	c690.a1	GRMZM2G325575_P01	Zm00001d052316	moderately similar to ( 283) AT2G40300 | Symbols: ATFER4 | ATFER4 (ferritin 4); binding / ferric iron binding / oxidoreductase/ transition metal ion binding | chr2:16831501-16833214 REVERSEmoderately similar to ( 402) FRI1_MAIZE Ferritin-1, chloroplast precursor (EC 1.16.3.1) (ZmFer1) - Zea mays (Maize)moderately similar to ( 351) loc_os12g01530 12012.m26727 protein ferritin-1, chloroplast precur…	metal handling	2.83132e+17	98.6385	0	0	5.705e-05	0.000342934	0.447375	1
SC	c806.a1	GRMZM5G830681_P01	Zm00001d006820	highly similar to ( 585) AT3G08900 | Symbols: RGP3, RGP | RGP3 (REVERSIBLY GLYCOSYLATED POLYPEPTIDE 3); transferase, transferring hexosyl groups | chr3:2708347-2709714 REVERSEhighly similar to ( 598) UPTG2_SOLTU Alpha-1,4-glucan-protein synthase [UDP-forming] 2 (EC 2.4.1.112) (UDP-glucose:protein transglucosylase 2) (UPTG 2) - Solanum tuberosum (Potato)highly similar to ( 633) loc_os07g41360 1200…	Carbohydrate metabolism	2.818e+17	15.4735	1.73439e-12	6.19343e-12	0.00348948	0.0128861	0.474038	1
SC	d1013.a2	GRMZM2G180988_P01	Zm00001d011854	nearly identical (1133) AT2G41740 | Symbols: VLN2, ATVLN2 | VLN2 (VILLIN 2); actin binding | chr2:17410962-17416878 REVERSEnearly identical (1366) loc_os03g24220 12003.m34866 protein villin-3, putative, expressed seq=cds; coord=8:158089073..158099500:-1; parent_gene=GRMZM2G180988	Cell motility	2.79008e+17	120783	0.0120704	0.0172526	0.540827	0.644466	0.340945	1
SC	c245.a1	AC234515.1_FGP003	Zm00001d015348	highly similar to ( 804) AT5G23860 | Symbols: TUB8 | TUB8; structural constituent of cytoskeleton | chr5:8042962-8044528 FORWARDhighly similar to ( 821) TBB5_ORYSA Tubulin beta-5 chain (Beta-5 tubulin) - Oryza sativa (Rice)highly similar to ( 821) loc_os06g46000 12006.m31916 protein tubulin beta-3 chain, putative, expressed seq=cds; coord=5:83557023..83560095:1; parent_gene=AC234515.1_FG003	Cell motility	2.76194e+17	7.68307	0.0136247	0.0193773	2.06501e-14	4.85727e-13	0.0100564	0.279821
SC	d1001.a1	GRMZM2G122337_P01	Zm00001d035001	weakly similar to ( 103) AT1G60950 | Symbols: FED A, ATFD2 | FED A; 2 iron, 2 sulfur cluster binding / electron carrier/ iron-sulfur cluster binding | chr1:22444565-22445011 FORWARDweakly similar to ( 182) FER1_MAIZE Ferredoxin-1, chloroplast precursor (Ferredoxin I) (Fd I) - Zea mays (Maize)weakly similar to ( 130) loc_os08g01380 12008.m080056 protein ferredoxin-1, chloroplast precursor, putativ…	Energy metabolism	2.72992e+17	8.6707	0	0	0.596371	0.69684	0.883193	1
SC	d1054.a1	GRMZM2G047695_P01	Zm00001d044101	highly similar to ( 649) AT5G14260 | Symbols: | SET domain-containing protein | chr5:4601139-4603873 FORWARDvery weakly similar to (85.1) RBCMT_TOBAC Ribulose-1,5 bisphosphate carboxylase/oxygenase large subunit N-methyltransferase, chloroplast precursor (EC 2.1.1.127) ([Ribulose-bisphosphate carboxylase]-lysine N-methyltransferase) (RuBisCO methyltransferase) (RuBisCO LSMT) (rbcMT)highly similar…	Transcription	2.64014e+17	4.56634	9.20074e-05	0.000169595	0.20192	0.325299	0.863586	1
SC	c874.a1	GRMZM2G038636_P01	Zm00001d020636	moderately similar to ( 499) AT5G60360 | Symbols: AALP | AALP (Arabidopsis aleurain-like protease); cysteine-type peptidase | chr5:24280044-24282157 FORWARDhighly similar to ( 662) CYSP2_MAIZE Cysteine proteinase 2 precursor (EC 3.4.22.-) - Zea mays (Maize)highly similar to ( 593) loc_os09g27030 12009.m059986 protein thiol protease aleurain precursor, putative, expressed seq=cds; coord=7:12198174…	Folding, sorting and degradation	2.60663e+17	187.514	0.0159821	0.0224288	0.100043	0.188913	0.857631	1
SC	c704.a1	GRMZM2G023591_P01	NA	weakly similar to ( 163) AT4G09040 | Symbols: | RNA recognition motif (RRM)-containing protein | chr4:5795075-5797193 REVERSEweakly similar to ( 101) ROC5_NICSY 33 kDa ribonucleoprotein, chloroplast precursor - Nicotiana sylvestris (Wood tobacco)moderately similar to ( 276) loc_os08g37700 12008.m080189 protein ribonucleoprotein, chloroplast precursor, putative, expressed seq=cds; coord=1:18210028…	Transcription	2.60016e+17	549.616	2.14548e-05	4.19785e-05	0.0377972	0.0881392	0.342594	1
SC	c627.a2	GRMZM2G102000_P01	Zm00001d002373	nearly identical (1444) AT2G32730 | Symbols: | 26S proteasome regulatory subunit, putative | chr2:13880189-13885464 FORWARDnearly identical (1555) loc_os08g12820 12008.m26623 protein 26S proteasome non-ATPase regulatory subunit 1, putative, expressed seq=cds; coord=2:11209985..11217603:1; parent_gene=GRMZM2G102000	Folding, sorting and degradation	2.59839e+17	22.2264	0.21462	0.253237	0.266334	0.394218	0.269917	1
SC	c245.a3	GRMZM5G853513_P01	Zm00001d013139	highly similar to ( 820) AT5G23860 | Symbols: TUB8 | TUB8; structural constituent of cytoskeleton | chr5:8042962-8044528 FORWARDhighly similar to ( 837) TBB7_ORYSA Tubulin beta-7 chain (Beta-7 tubulin) (pTUB22) - Oryza sativa (Rice)highly similar to ( 837) loc_os03g56810 12003.m35436 protein tubulin beta-7 chain, putative, expressed seq=cds; coord=5:5214906..5217855:-1; parent_gene=GRMZM5G853513	Cell motility	2.55012e+17	8.85025	0.0855601	0.10817	1.90048e-12	3.31664e-11	0.0101224	0.279821
SC	d1013.a1	GRMZM2G180988_P02*	Zm00001d011854	nearly identical (1215) AT2G41740 | Symbols: VLN2, ATVLN2 | VLN2 (VILLIN 2); actin binding | chr2:17410962-17416878 REVERSEnearly identical (1458) loc_os03g24220 12003.m34866 protein villin-3, putative, expressed seq=cds; coord=8:158089079..158099475:-1; parent_gene=GRMZM2G180988	Cell motility	2.54852e+17	263.067	0.319007	0.363715	0.748133	0.817656	0.808905	1
SC	c245.a8	GRMZM2G316113_P01*	Zm00001d011704	highly similar to ( 710) AT2G19520 | Symbols: FVE, ACG1, MSI4, NFC4, NFC04, ATMSI4 | FVE; metal ion binding | chr2:8456006-8459235 FORWARDhighly similar to ( 796) loc_os01g51300 12001.m43161 protein WD-40 repeat protein MSI4, putative, expressed seq=cds; coord=8:154464880..154470561:1; parent_gene=GRMZM2G316113	Signaling molecules and interactions	2.43075e+17	10.4534	0.0754541	0.0962752	0.52043	0.624977	0.653172	1
SC	d1042.a1	CUFF.60171_25276413_25282816_PAVcov_451_scaffold6745|Frame1|Orf	NA	NA	NA	2.37493e+17	32.4315	1.38178e-12	5.0003e-12	0.000230526	0.00125341	0.565974	1
SC	c897.a1	GRMZM2G031721_P01	NA	moderately similar to ( 264) AT4G13670 | Symbols: PTAC5 | PTAC5 (PLASTID TRANSCRIPTIONALLY ACTIVE5); heat shock protein binding / unfolded protein binding | chr4:7948644-7950779 FORWARDmoderately similar to ( 344) loc_os04g43420 12004.m09305 protein peptidoglycan binding domain containing protein, putative, expressed seq=cds; coord=10:130307184..130310968:1; parent_gene=GRMZM2G031721	notassigned	2.35521e+17	4.89039	0.0120626	0.0172526	1.94125e-05	0.000131277	0.0287698	0.46937
SC	d1093.a1	GRMZM2G345700_P01	Zm00001d002347	weakly similar to ( 112) AT3G22142 | Symbols: | structural constituent of cell wall | chr3:7803604-7808046 REVERSEvery weakly similar to (95.5) 14KD_DAUCA 14 kDa proline-rich protein DC2.15 precursor - Daucus carota (Carrot)weakly similar to ( 170) loc_os04g52260 12004.m10121 protein 36.4 kDa proline-rich protein, putative, expressed seq=cds; coord=2:10539346..10540455:-1; parent_gene=GRMZM2G3457…	misc	2.32255e+17	138.789	0	0	0.208963	0.333479	0.152842	0.920617
SC	d1156.a1	GRMZM2G054056_P01*	Zm00001d038091	moderately similar to ( 400) AT1G31500 | Symbols: | endonuclease/exonuclease/phosphatase family protein | chr1:11273821-11276534 REVERSEhighly similar to ( 604) loc_os05g32330 12005.m27584 protein hydrolase, putative, expressed seq=cds; coord=6:143349226..143361058:-1; parent_gene=GRMZM2G054056	Replication and repair	2.1969e+17	24.7492	0.543956	0.582733	0.00012607	0.000721731	0.534399	1
SC	c967.a1	GRMZM2G122324_P01	Zm00001d049267	weakly similar to ( 119) AT4G25050 | Symbols: ACP4 | ACP4 (acyl carrier protein 4); acyl carrier | chr4:12870178-12871024 FORWARDweakly similar to ( 110) ACP1_SPIOL Acyl carrier protein 1, chloroplast precursor (Acyl carrier protein I) (ACP I) - Spinacia oleracea (Spinach)weakly similar to ( 156) loc_os11g31900 12011.m28810 protein acyl carrier protein 2, chloroplast precursor, putative, expresse…	Lipid metabolism	2.18045e+17	27127.8	0.0161355	0.0226148	0.0376161	0.0879109	0.605535	1
SC	c449.a3	GRMZM2G160327_P01	Zm00001d016443	moderately similar to ( 341) AT5G42180 | Symbols: | peroxidase 64 (PER64) (P64) (PRXR4) | chr5:16852702-16854021 FORWARDmoderately similar to ( 235) PER1_ORYSA Peroxidase 1 precursor (EC 1.11.1.7) - Oryza sativa (Rice)moderately similar to ( 426) loc_os02g58720 12002.m100428 protein peroxidase 64 precursor, putative, expressed seq=cds; coord=5:158822234..158824128:1; parent_gene=GRMZM2G160327	Carbohydrate metabolism	2.17733e+17	47.5906	0	0	2.88451e-06	2.21351e-05	0.102703	0.80277
SC	c670.a3	GRMZM2G351248_P01	Zm00001d032783	weakly similar to ( 192) AT4G31530 | Symbols: | binding / catalytic | chr4:15282281-15284064 FORWARDvery weakly similar to (97.8) TBG3_MAIZE Tubulin gamma-3 chain (Gamma-3 tubulin) (Fragment) - Zea mays (Maize)moderately similar to ( 209) loc_os03g23980 12003.m07744 protein 3-beta hydroxysteroid dehydrogenase/isomerase family protein, putative, expressed seq=cds; coord=1:234386317..234392922:1; p…	Cell motility	2.11256e+17	5.36319	0.076224	0.097143	5.68769e-09	6.47798e-08	0.235717	1
SC	c554.a3	GRMZM2G028516_P01*	Zm00001d012170	highly similar to ( 535) AT1G08450 | Symbols: CRT3 | CRT3 (CALRETICULIN 3); calcium ion binding / unfolded protein binding | chr1:2668008-2671800 REVERSEmoderately similar to ( 466) CALR_RICCO Calreticulin precursor - Ricinus communis (Castor bean)highly similar to ( 627) loc_os01g67054 12001.m43324 protein calreticulin-3 precursor, putative, expressed seq=cds; coord=8:164432132..164436313:-1; pa…	Signal transduction	1.94224e+17	199.191	2.00444e-05	3.93824e-05	0.0170622	0.0487105	0.215866	1
SC	c959.a1	GRMZM2G059314_P01	Zm00001d038365	moderately similar to ( 429) AT2G37790 | Symbols: | aldo/keto reductase family protein | chr2:15838838-15840752 FORWARDmoderately similar to ( 249) ALDR_HORVU Aldose reductase (EC 1.1.1.21) (AR) (Aldehyde reductase) - Hordeum vulgare (Barley)highly similar to ( 502) loc_os05g38230 12005.m28060 protein aldose reductase, putative, expressed seq=cds; coord=6:151454748..151457344:-1; parent_gene=GRMZ…	Carbohydrate metabolism	1.92377e+17	29.6542	2.36478e-14	1.00736e-13	5.44009e-15	1.36888e-13	0.716956	1
SC	d1148.a1	GRMZM2G441753_P01	NA	NA	NA	1.86942e+17	41.634	0.000102379	0.000187435	0	0	0.876644	1
SC	c520.a2	GRMZM2G069762_P01*	Zm00001d000120	weakly similar to ( 127) AT3G52580 | Symbols: | 40S ribosomal protein S14 (RPS14C) | chr3:19503324-19504701 FORWARDweakly similar to ( 129) RS142_MAIZE 40S ribosomal protein S14 (Clone MCH2) - Zea mays (Maize)weakly similar to ( 129) loc_os04g33750 12004.m08470 protein 40S ribosomal protein S14, putative, expressed seq=cds; coord=4:108547853..108549114:-1; parent_gene=GRMZM2G069762	Translation	1.83609e+17	1524.9	0.0210102	0.0287033	0.00135272	0.00594978	0.745307	1
SC	d1284.a1	GRMZM2G022130_P04	Zm00001d013845	highly similar to ( 538) AT5G53580 | Symbols: | aldo/keto reductase family protein | chr5:21765215-21766919 REVERSEvery weakly similar to (81.3) NADO1_ORYSA Probable NAD(P)H-dependent oxidoreductase 1 (EC 1.1.1.-) - Oryza sativa (Rice)highly similar to ( 613) loc_os10g37330 12010.m06526 protein aldo-keto reductase/ oxidoreductase, putative, expressed seq=cds; coord=5:21891976..21903419:-1; parent…	Carbohydrate metabolism	1.8104e+17	2323.61	3.36986e-12	1.18383e-11	0.000394801	0.00201497	0.0152956	0.359184
SC	c639.a2	GRMZM2G098577_P01	Zm00001d025777	highly similar to ( 759) AT5G57870 | Symbols: | eukaryotic translation initiation factor 4F, putative / eIF-4F, putative | chr5:23439755-23443433 FORWARDnearly identical (1029) IF41_WHEAT Eukaryotic initiation factor iso-4F subunit p82-34 (eIF-(iso)4F p82-34) - Triticum aestivum (Wheat)nearly identical (1062) loc_os04g42140 12004.m09187 protein eukaryotic initiation factor iso-4F subunit p82-34, …	Translation	1.71193e+17	5.38695	0.025902	0.0350324	0.0887163	0.174212	0.378427	1
SC	d1211.a1	GRMZM2G029055_P01	Zm00001d028038	highly similar to ( 842) AT3G55400 | Symbols: OVA1 | OVA1 (OVULE ABORTION 1); ATP binding / aminoacyl-tRNA ligase/ methionine-tRNA ligase/ nucleotide binding | chr3:20536263-20538999 REVERSEweakly similar to ( 166) SYM_ORYSA Probable methionyl-tRNA synthetase (EC 6.1.1.10) (Methionine--tRNA ligase) (MetRS) - Oryza sativa (Rice)highly similar to ( 997) loc_os03g11120 12003.m06563 protein methionyl…	Translation	1.61495e+17	159.573	9.49585e-05	0.000174737	0.13215	0.234788	0.379156	1
SC	d1299.a1	GRMZM2G148769_P01*	Zm00001d006185	moderately similar to ( 342) AT5G24400 | Symbols: emb2024 | emb2024 (embryo defective 2024); 6-phosphogluconolactonase/ catalytic | chr5:8330532-8331784 REVERSEmoderately similar to ( 464) loc_os09g35970 12009.m06548 protein 6-phosphogluconolactonase, putative, expressed seq=cds; coord=2:220832499..220836411:-1; parent_gene=GRMZM2G148769	Carbohydrate metabolism	1.60272e+17	3.33117	5.70551e-05	0.000107363	0.0107549	0.0331532	0.549756	1
SC	c715.a2	GRMZM2G083326_P01	NA	NA	NA	1.58415e+17	3986.41	7.1476e-09	1.93343e-08	0.160665	0.275935	0.64252	1
SC	d1472.a1	GRMZM2G103197_P01	Zm00001d031934	moderately similar to ( 204) AT1G19670 | Symbols: ATCLH1, CORI1, ATHCOR1 | ATCLH1 (ARABIDOPSIS THALIANA CORONATINE-INDUCED PROTEIN 1); chlorophyllase | chr1:6803796-6804923 REVERSEweakly similar to ( 172) CLH1_CITSI Chlorophyllase-1, chloroplast precursor (EC 3.1.1.14) (Chlorophyll-chlorophyllido hydrolase 1) (Chlase 1) - Citrus sinensis (Sweet orange)weakly similar to ( 184) loc_os10g28370 12010…	Metabolism of cofactors and vitamins	1.56726e+17	206.654	4.93591e-10	1.47532e-09	0	0	1.00968e-06	0.000136559
SC	c937.a1	AC198361.3_FGP004	Zm00001d032739	moderately similar to ( 262) AT4G14300 | Symbols: | heterogeneous nuclear ribonucleoprotein, putative / hnRNP, putative | chr4:8231179-8232785 FORWARDvery weakly similar to (89.4) ROC1_NICSY 29 kDa ribonucleoprotein A, chloroplast precursor (CP29A) - Nicotiana sylvestris (Wood tobacco)moderately similar to ( 342) loc_os10g33230 12010.m06153 protein heterogeneous nuclear ribonucleoprotein 27C, put…	Transcription	1.50626e+17	10.6087	0.560339	0.598506	0.337365	0.464125	0.659121	1
SC	c808.a1	GRMZM2G006672_P02	Zm00001d050965	highly similar to ( 595) AT4G35260 | Symbols: IDH1 | IDH1 (ISOCITRATE DEHYDROGENASE 1); isocitrate dehydrogenase (NAD+)/ oxidoreductase, acting on the CH-OH group of donors, NAD or NADP as acceptor | chr4:16774494-16776233 REVERSEmoderately similar to ( 295) LEU3_SOLTU 3-isopropylmalate dehydrogenase, chloroplast precursor (EC 1.1.1.85) (Beta-IPM dehydrogenase) (IMDH) (3-IPM-DH) - Solanum tuberos…	Carbohydrate metabolism	1.45564e+17	1.99659	0.000134578	0.000243095	0.447566	0.55791	0.342562	1
SC	c457.a4	GRMZM2G135470_P01	Zm00001d025626	highly similar to ( 792) AT3G48170 | Symbols: ALDH10A9 | ALDH10A9; 3-chloroallyl aldehyde dehydrogenase/ oxidoreductase | chr3:17786290-17789918 REVERSEhighly similar to ( 931) BADH_ORYSA Betaine-aldehyde dehydrogenase (EC 1.2.1.8) (BADH) - Oryza sativa (Rice)highly similar to ( 931) loc_os04g39020 12004.m08891 protein betaine-aldehyde dehydrogenase, putative, expressed seq=cds; coord=10:12337348…	Biosynthesis of other secondary metabolites	1.44915e+17	68.2625	0	0	0.496063	0.604437	0.958188	1
SC	d1088.a2	GRMZM2G162992_P02	Zm00001d053564	moderately similar to ( 307) AT2G25970 | Symbols: | KH domain-containing protein | chr2:11071844-11075604 REVERSEhighly similar to ( 555) loc_os02g13130 12002.m100758 protein DNA-directed RNA polymerase, putative, expressed seq=cds; coord=4:229408072..229414150:-1; parent_gene=GRMZM2G162992	Transcription	1.41983e+17	28.048	0.00236496	0.00370853	0.451461	0.560796	0.358286	1
SC	c808.a2	GRMZM2G116872_P01	Zm00001d017091	moderately similar to ( 266) AT4G35260 | Symbols: IDH1 | IDH1 (ISOCITRATE DEHYDROGENASE 1); isocitrate dehydrogenase (NAD+)/ oxidoreductase, acting on the CH-OH group of donors, NAD or NADP as acceptor | chr4:16774494-16776233 REVERSEweakly similar to ( 144) LEU3_SOLTU 3-isopropylmalate dehydrogenase, chloroplast precursor (EC 1.1.1.85) (Beta-IPM dehydrogenase) (IMDH) (3-IPM-DH) - Solanum tuberos…	Carbohydrate metabolism	1.35385e+17	2.46272	0.000776076	0.00128005	0.455896	0.562463	0.227615	1
SC	c609.a2	GRMZM2G119169_P02	Zm00001d010009	moderately similar to ( 291) AT1G67430 | Symbols: | 60S ribosomal protein L17 (RPL17B) | chr1:25262209-25263627 FORWARDmoderately similar to ( 320) RL17_MAIZE 60S ribosomal protein L17 - Zea mays (Maize)moderately similar to ( 321) loc_os09g08430 12009.m04110 protein 60S ribosomal protein L17, putative, expressed seq=cds; coord=8:93176490..93179884:-1; parent_gene=GRMZM2G119169	Translation	1.32512e+17	84.2177	3.28848e-13	1.28453e-12	0.244696	0.368749	0.416681	1
SC	c930.a1	GRMZM2G149717_P01*	Zm00001d038955	nearly identical (1006) AT5G42080 | Symbols: ADL1, ADL1A, AG68, DRP1A | ADL1 (ARABIDOPSIS DYNAMIN-LIKE PROTEIN); GTP binding / GTPase/ protein binding | chr5:16821564-16824536 REVERSEnearly identical (1120) loc_os05g48240 12005.m27959 protein dynamin-related protein 1A, putative, expressed seq=cds; coord=8:66662443..66672048:-1; parent_gene=GRMZM2G314647	misc	1.27105e+17	26.2723	0.135035	0.164907	0.636967	0.734035	0.8318	1
SC	c812.a1	GRMZM2G155242_P01	Zm00001d028180	highly similar to ( 921) AT2G22240 | Symbols: ATMIPS2, MIPS2 | MIPS2 (MYO-INOSITOL-1-PHOSTPATE SYNTHASE 2); binding / catalytic/ inositol-3-phosphate synthase | chr2:9451901-9453375 REVERSEnearly identical (1015) INO1_MAIZE Inositol-3-phosphate synthase (EC 5.5.1.4) (Myo-inositol-1-phosphate synthase) (MI-1-P synthase) (IPS) - Zea mays (Maize)highly similar to ( 985) loc_os03g09250 12003.m35064 p…	Carbohydrate metabolism	1.23328e+17	2.72736	0.584139	0.621474	0.478306	0.586766	0.978134	1
SC	d1296.a1	GRMZM2G150295_P01	Zm00001d003081	weakly similar to ( 160) AT5G40370 | Symbols: | glutaredoxin, putative | chr5:16147826-16148900 REVERSEweakly similar to ( 191) GLRX_ORYSA Glutaredoxin - Oryza sativa (Rice)weakly similar to ( 193) loc_os04g42930 12004.m101575 protein OsGrx_C2.2 - glutaredoxin subgroup I, expressed seq=cds; coord=2:29943554..29946951:-1; parent_gene=GRMZM2G150295	Folding, sorting and degradation	1.11911e+17	249.05	0	0	0.0304331	0.074464	0.0634007	0.642052
SC	d1407.a1	GRMZM2G108285_P01	Zm00001d021709	moderately similar to ( 407) AT3G02780 | Symbols: IPP2, IPIAT1, IDI2 | IPP2 (ISOPENTENYL PYROPHOSPHATE:DIMETHYLALLYL PYROPHOSPHATE ISOMERASE 2); isopentenyl-diphosphate delta-isomerase | chr3:602578-604648 REVERSEmoderately similar to ( 435) loc_os07g36190 12007.m07872 protein isopentenyl-diphosphate delta-isomerase II, putative, expressed seq=cds; coord=7:155559747..155562921:1; parent_gene=GRMZ…	Biosynthesis of other secondary metabolites	1.10944e+17	1159.39	0.803295	0.829356	0.00184499	0.00770763	0.670313	1
SC	c931.a1	GRMZM2G049839_P01*	Zm00001d053658	highly similar to ( 556) AT3G13235 | Symbols: | ubiquitin family protein | chr3:4271492-4274348 REVERSEhighly similar to ( 669) loc_os02g10510 12002.m06349 protein DNA damage-inducible protein DDI1, putative, expressed seq=cds; coord=4:233120026..233126298:-1; parent_gene=GRMZM2G049839	Folding, sorting and degradation	1.08568e+17	23.8619	3.62397e-11	1.17399e-10	0.000636035	0.00304509	0.163826	0.955288
SC	d1076.a1	GRMZM2G047274_P01	Zm00001d043195	moderately similar to ( 421) AT1G79340 | Symbols: AtMC4 | AtMC4 (metacaspase 4); cysteine-type peptidase | chr1:29842849-29844368 FORWARDhighly similar to ( 642) loc_os01g58580 12001.m12000 protein latex-abundant protein, putative, expressed seq=cds; coord=3:188328660..188331609:-1; parent_gene=GRMZM2G047274	Folding, sorting and degradation	1.08104e+17	7.55542	1.73195e-14	7.46601e-14	0.309748	0.43904	0.587918	1
SC	c503.a2	GRMZM5G852185_P02*	Zm00001d035094	moderately similar to ( 242) AT4G00100 | Symbols: ATRPS13A, RPS13, PFL2 | ATRPS13A (ARABIDOPSIS THALIANA RIBOSOMAL PROTEIN S13A); structural constituent of ribosome | chr4:37172-38123 FORWARDmoderately similar to ( 271) RS13_MAIZE 40S ribosomal protein S13 - Zea mays (Maize)moderately similar to ( 270) loc_os08g02410 12008.m04385 protein 40S ribosomal protein S13, putative, expressed seq=cds; coo…	Translation	1.05511e+17	1116.04	3.33067e-16	1.59459e-15	0.0169402	0.0484902	0.657779	1
SC	c903.a2	GRMZM5G887054_P01	Zm00001d015300	moderately similar to ( 241) AT1G02780 | Symbols: emb2386 | emb2386 (embryo defective 2386); structural constituent of ribosome | chr1:608120-609391 REVERSEweakly similar to ( 111) RL19_MAIZE 60S ribosomal protein L19 (Fragment) - Zea mays (Maize)moderately similar to ( 258) loc_os03g21940 12003.m07598 protein 60S ribosomal protein L19-3, putative, expressed seq=cds; coord=5:81155197..81157909:-1…	Translation	1.05235e+17	50.9232	1.11022e-16	5.43557e-16	0.0997385	0.188913	0.853562	1
SC	c812.a2	GRMZM2G004528_P03	Zm00001d048201	highly similar to ( 910) AT2G22240 | Symbols: ATMIPS2, MIPS2 | MIPS2 (MYO-INOSITOL-1-PHOSTPATE SYNTHASE 2); binding / catalytic/ inositol-3-phosphate synthase | chr2:9451901-9453375 REVERSEhighly similar to ( 993) INO1_MAIZE Inositol-3-phosphate synthase (EC 5.5.1.4) (Myo-inositol-1-phosphate synthase) (MI-1-P synthase) (IPS) - Zea mays (Maize)highly similar to ( 981) loc_os03g09250 12003.m35064 …	Carbohydrate metabolism	1.01341e+17	2.59335	0.9727	0.978124	0.43997	0.552132	0.986073	1
SC	d1068.a1	GRMZM2G130398_P01*	Zm00001d022316	moderately similar to ( 413) AT2G27020 | Symbols: PAG1 | PAG1; endopeptidase/ peptidase/ threonine-type endopeptidase | chr2:11528515-11530858 REVERSEmoderately similar to ( 451) PSA3_ORYSA Proteasome subunit alpha type 3 (EC 3.4.25.1) (20S proteasome alpha subunit G) (20S proteasome subunit alpha-7) - Oryza sativa (Rice)moderately similar to ( 451) loc_os01g59600 12001.m43238 protein proteasome …	Folding, sorting and degradation	9.50305e+16	87.1447	0.000440164	0.00074068	0.703996	0.781876	0.894409	1
SC	c517.a2	GRMZM2G415491_P01	Zm00001d012922	highly similar to ( 803) AT5G26742 | Symbols: emb1138 | emb1138 (embryo defective 1138); ATP binding / ATP-dependent helicase/ RNA binding / helicase/ nucleic acid binding / zinc ion binding | chr5:9285540-9288871 REVERSEmoderately similar to ( 322) RH7_SPIOL DEAD-box ATP-dependent RNA helicase 7 (EC 3.6.1.-) - Spinacia oleracea (Spinach)highly similar to ( 833) loc_os03g61220 12003.m35496 protei…	Transcription	9.0116e+16	355.315	0.00154454	0.00247952	0.0608503	0.129352	0.890517	1
SC	c128.a2	GRMZM5G853854_P02*	Zm00001d002261	highly similar to ( 504) AT4G18360 | Symbols: | (S)-2-hydroxy-acid oxidase, peroxisomal, putative / glycolate oxidase, putative / short chain alpha-hydroxy acid oxidase, putative | chr4:10146627-10148386 REVERSEmoderately similar to ( 498) GOX_SPIOL Peroxisomal (S)-2-hydroxy-acid oxidase (EC 1.1.3.15) (Glycolate oxidase) (GOX) (Short chain alpha-hydroxy acid oxidase) - Spinacia oleracea (Spinach)…	Energy metabolism	8.92891e+16	15.3431	0.519537	0.561017	0.92776	0.951503	0.704773	1
SC	c209.a5	GRMZM2G367842_P01	NA	NA	NA	8.57942e+16	3612.54	1.30103e-09	3.76394e-09	0.00244151	0.00964128	0.210845	1
SC	d1270.a1	GRMZM2G387076_P02	Zm00001d012275	moderately similar to ( 315) AT5G58060 | Symbols: YKT61, ATYKT61, ATGP1 | YKT61 | chr5:23498277-23500128 FORWARDmoderately similar to ( 256) H32_WHEAT Histone H3.2 - Triticum aestivum (Wheat)moderately similar to ( 352) loc_os01g64650 12001.m43292 protein VAMP-like protein YKT62, putative, expressed seq=cds; coord=8:166498733..166503815:-1; parent_gene=GRMZM2G387076	Replication and repair	7.88693e+16	483.471	0.273075	0.314997	0.367377	0.491957	0.522402	1
SC	c900.a1	GRMZM2G036534_P01	Zm00001d023606	moderately similar to ( 418) AT1G34430 | Symbols: EMB3003 | EMB3003 (embryo defective 3003); acyltransferase/ dihydrolipoyllysine-residue acetyltransferase/ protein binding | chr1:12588027-12590084 REVERSEhighly similar to ( 592) loc_os12g08170 12012.m04804 protein dihydrolipoyllysine-residue acetyltransferase component of pyruvatedehydrogenase complex, mitochondrial precursor, putative, expresse…	Carbohydrate metabolism	7.79716e+16	44.6475	0	0	0.816202	0.874387	0.62026	1
SC	c808.a3	GRMZM2G025366_P01*	Zm00001d025690	highly similar to ( 564) AT4G35260 | Symbols: IDH1 | IDH1 (ISOCITRATE DEHYDROGENASE 1); isocitrate dehydrogenase (NAD+)/ oxidoreductase, acting on the CH-OH group of donors, NAD or NADP as acceptor | chr4:16774494-16776233 REVERSEmoderately similar to ( 269) LEU3_SOLTU 3-isopropylmalate dehydrogenase, chloroplast precursor (EC 1.1.1.85) (Beta-IPM dehydrogenase) (IMDH) (3-IPM-DH) - Solanum tuberos…	Carbohydrate metabolism	7.76032e+16	4.10428	0.622067	0.65666	0.815608	0.874387	0.885842	1
SC	d1270.a2	GRMZM2G078314_P01	Zm00001d042730	moderately similar to ( 259) AT5G65360 | Symbols: | histone H3 | chr5:26120099-26120509 REVERSEmoderately similar to ( 257) H32_PETCR Histone H3.2 - Petroselinum crispum (Parsley) (Petroselinum hortense)moderately similar to ( 259) loc_os11g05730 12011.m04769 protein histone H3, putative, expressed seq=cds; coord=3:175868332..175869457:-1; parent_gene=GRMZM2G078314	Replication and repair	7.70203e+16	42705.9	0.0952448	0.119139	0.446361	0.557051	0.696322	1
SC	d1029.a1	GRMZM2G174708_P01	Zm00001d029583	weakly similar to ( 179) AT5G06870 | Symbols: PGIP2, ATPGIP2 | PGIP2 (POLYGALACTURONASE INHIBITING PROTEIN 2); protein binding | chr5:2133941-2135016 FORWARDweakly similar to ( 181) PGIP2_PHAVU Polygalacturonase inhibitor 2 precursor (Polygalacturonase-inhibiting protein) (PGIP-2) - Phaseolus vulgaris (Kidney bean) (French bean)moderately similar to ( 389) loc_os03g32180 12003.m08463 protein poly…	Carbohydrate metabolism	7.40071e+16	358.076	0.498132	0.5406	3.78808e-13	7.31911e-12	0.136916	0.897837
SC	d1021.a1	GRMZM2G173277_P02*	Zm00001d014417	weakly similar to ( 164) AT1G49140 | Symbols: | NADH-ubiquinone oxidoreductase-related | chr1:18177696-18178269 REVERSEmoderately similar to ( 211) loc_os10g42540 12010.m07007 protein expressed protein seq=cds; coord=5:44153866..44159732:1; parent_gene=GRMZM2G173277	Energy metabolism	6.8093e+16	5.03265	3.33067e-15	1.48917e-14	0.403307	0.5214	0.926456	1
SC	c965.a1	GRMZM2G007928_P01	Zm00001d042867	very weakly similar to (80.5) loc_os03g60840 12003.m10972 protein Bowman-Birk type trypsin inhibitor, putative, expressed seq=cds; coord=3:179632947..179634101:1; parent_gene=GRMZM2G007928	notassigned	6.6965e+16	996.525	0	0	0.000346701	0.00179488	0.00943977	0.27605
SC	d1547.a1	AC212835.3_FGP007	Zm00001d002775	moderately similar to ( 488) AT4G17100 | Symbols: | unknown protein | chr4:9610164-9612513 REVERSEhighly similar to ( 707) loc_os04g45910 12004.m35397 protein placental protein 11 precursor, putative, expressed seq=cds; coord=2:21007540..21010895:1; parent_gene=AC212835.3_FG007	notassigned	6.66175e+16	245.53	0.987738	0.988652	0.298312	0.427584	0.485419	1
SC	c917.a1	GRMZM2G372074_P01	Zm00001d002094	weakly similar to ( 114) AT3G22142 | Symbols: | structural constituent of cell wall | chr3:7803604-7808046 REVERSEvery weakly similar to (85.9) 14KD_DAUCA 14 kDa proline-rich protein DC2.15 precursor - Daucus carota (Carrot)weakly similar to ( 111) loc_os06g07220 12006.m05445 protein 36.4 kDa proline-rich protein, putative, expressed seq=cds; coord=2:5924234..5926085:1; parent_gene=GRMZM2G372074	misc	6.28611e+16	1810.32	0	0	0.0125832	0.0376144	0.801594	1
SC	c665.a2	GRMZM5G814376_P01	NA	NA	NA	6.17427e+16	12.904	1.19051e-07	2.94095e-07	0.00222409	0.00897936	0.941983	1
SC	c895.a2	GRMZM2G062394_P01*	Zm00001d034517	highly similar to ( 613) AT3G58500 | Symbols: PP2A-3, EP7 | PP2A-3 (PROTEIN PHOSPHATASE 2A-3); protein serine/threonine phosphatase | chr3:21635503-21638911 REVERSEhighly similar to ( 646) PP2A2_ORYSA Serine/threonine-protein phosphatase PP2A-2 catalytic subunit (EC 3.1.3.16) - Oryza sativa (Rice)highly similar to ( 646) loc_os03g59060 12003.m35470 protein OsPP2Ac-2 - Phosphatase 2A isoform 2 bel…	Folding, sorting and degradation	5.82577e+16	95.1703	8.88178e-16	4.0894e-15	0.693689	0.776565	0.0247143	0.469138
SC	c768.a2	GRMZM2G005493_P01	Zm00001d007113	highly similar to ( 745) AT5G57655 | Symbols: | xylose isomerase family protein | chr5:23347030-23349805 FORWARDhighly similar to ( 835) XYLA_HORVU Xylose isomerase (EC 5.3.1.5) - Hordeum vulgare (Barley)highly similar to ( 863) loc_os07g47290 12007.m29315 protein xylose isomerase, putative, expressed seq=cds; coord=2:215654249..215658893:-1; parent_gene=GRMZM2G005493	Carbohydrate metabolism	5.10717e+16	21.9662	0	0	0.0017963	0.00753334	0.220119	1
SC	c245.a2	GRMZM2G043822_P02*	Zm00001d036626	highly similar to ( 824) AT5G62700 | Symbols: TUB3 | TUB3; GTP binding / GTPase/ structural molecule | chr5:25184501-25186426 FORWARDhighly similar to ( 850) TBB7_MAIZE Tubulin beta-7 chain (Beta-7 tubulin) - Zea mays (Maize)highly similar to ( 844) loc_os06g46000 12006.m31916 protein tubulin beta-3 chain, putative, expressed seq=cds; coord=6:92813568..92815975:-1; parent_gene=GRMZM2G043822	Cell motility	4.62706e+16	8.79404	0.52264	0.563805	2.987e-10	3.89389e-09	0.0294395	0.46937
SC	c825.a1	GRMZM2G169384_P01	Zm00001d048291	moderately similar to ( 243) AT3G15000 | Symbols: | LOCATED IN: mitochondrion; EXPRESSED IN: 23 plant structures; EXPRESSED DURING: 13 growth stages; BEST Arabidopsis thaliana protein match is: plastid developmental protein DAG, putative (TAIR:AT3G06790.2); Has 50779 Blast hits to 24732 proteins in 941 species: Archae - 10; Bacteria - 4862; Metazoa - 25623; Fungi - 7071; Plants - 6957; Viruses - …	Signaling molecules and interactions	4.53669e+16	24.4719	1.47241e-11	4.9942e-11	0.369242	0.493069	0.407646	1
SC	d1027.a1	GRMZM2G019500_P01*	Zm00001d001814	weakly similar to ( 106) AT2G40060 | Symbols: | protein binding / structural molecule | chr2:16726564-16728001 FORWARDweakly similar to ( 164) loc_os04g58240 12004.m10706 protein expressed protein seq=cds; coord=2:1437067..1438637:-1; parent_gene=GRMZM2G019500	notassigned	4.43472e+16	189.783	1.35447e-14	5.90943e-14	0.787742	0.850917	0.185399	0.994451
SC	b58.a6	GRMZM2G171707_P01	Zm00001d006476	nearly identical (1436) AT2G05710 | Symbols: | aconitate hydratase, cytoplasmic, putative / citrate hydro-lyase/aconitase, putative | chr2:2141591-2146350 FORWARDnearly identical (1467) ACOC_ORYSA Putative aconitate hydratase, cytoplasmic (EC 4.2.1.3) (Citrate hydro-lyase) (Aconitase) - Oryza sativa (Rice)nearly identical (1470) loc_os08g09200 12008.m05055 protein aconitate hydratase, cytoplasmic…	Carbohydrate metabolism	4.41649e+16	11.6491	0.244459	0.284109	0.979697	0.990694	0.843465	1
SC	d1068.a3	GRMZM2G028346_P01	Zm00001d012546	moderately similar to ( 353) AT2G27020 | Symbols: PAG1 | PAG1; endopeptidase/ peptidase/ threonine-type endopeptidase | chr2:11528515-11530858 REVERSEmoderately similar to ( 383) PSA3_ORYSA Proteasome subunit alpha type 3 (EC 3.4.25.1) (20S proteasome alpha subunit G) (20S proteasome subunit alpha-7) - Oryza sativa (Rice)moderately similar to ( 383) loc_os01g59600 12001.m43238 protein proteasome …	Folding, sorting and degradation	4.29309e+16	113.156	0.00109671	0.00178174	0.877682	0.915768	0.764333	1
SC	c869.a1	GRMZM2G105398_P01	Zm00001d036905	highly similar to ( 557) AT1G52730 | Symbols: | transducin family protein / WD-40 repeat family protein | chr1:19642866-19644978 FORWARDhighly similar to ( 607) loc_os06g39760 12006.m08513 protein serine-threonine kinase receptor-associated protein, putative, expressed seq=cds; coord=6:102822983..102830266:1; parent_gene=GRMZM2G105398	Signal transduction	4.26836e+16	408.481	0.000458472	0.00077029	0.111626	0.205758	0.477867	1
SC	d1257.a1	GRMZM2G008728_P02	Zm00001d018418	moderately similar to ( 418) AT4G21580 | Symbols: | oxidoreductase, zinc-binding dehydrogenase family protein | chr4:11475822-11477514 FORWARDhighly similar to ( 531) loc_os02g56180 12002.m10642 protein quinone oxidoreductase, putative, expressed seq=cds; coord=5:214501921..214505061:1; parent_gene=GRMZM2G008728	misc	4.1238e+16	1326.52	2.96155e-09	8.30153e-09	4.84876e-09	5.64124e-08	0.209347	1
SC	c245.a7	GRMZM2G332809_P01	Zm00001d052873	moderately similar to ( 379) AT5G23860 | Symbols: TUB8 | TUB8; structural constituent of cytoskeleton | chr5:8042962-8044528 FORWARDmoderately similar to ( 379) TBB_HORVU Tubulin beta chain (Beta tubulin) - Hordeum vulgare (Barley)moderately similar to ( 379) loc_os05g34170 12005.m07648 protein tubulin beta-6 chain, putative, expressed seq=cds; coord=4:198764629..198773748:1; parent_gene=GRMZM2G3…	Cell motility	3.54385e+16	2762.29	0.0849598	0.107642	0	0	0.00410753	0.181502
SC	d1949.a1	AC187262.4_FGP007	Zm00001d031344	seq=cds; coord=1:184699840..184700461:-1; parent_gene=AC187262.4_FG007	notassigned	3.46327e+16	3298.18	0.233854	0.273842	0	0	0	0
SC	c260.a2	GRMZM2G179797_P03	Zm00001d038904	highly similar to ( 720) AT4G29840 | Symbols: MTO2, TS | MTO2 (METHIONINE OVER-ACCUMULATOR 2); threonine synthase | chr4:14599434-14601014 REVERSEhighly similar to ( 720) THRC_SOLTU Threonine synthase, chloroplast precursor (EC 4.2.3.1) (TS) - Solanum tuberosum (Potato)highly similar to ( 947) loc_os05g47640 12005.m08836 protein threonine synthase, chloroplast precursor, putative, expressed seq=c…	AminoAcid metabolism	3.41732e+16	149.702	0.00532963	0.00799814	0.247023	0.371736	0.353841	1
SC	c831.a1	GRMZM2G128056_P01	Zm00001d045085	highly similar to ( 613) AT4G30810 | Symbols: scpl29 | scpl29 (serine carboxypeptidase-like 29); serine-type carboxypeptidase | chr4:15003474-15006017 FORWARDhighly similar to ( 835) CBP22_HORVU Serine carboxypeptidase II-2 precursor (EC 3.4.16.6) (CP-MII.2) [Contains: Serine carboxypeptidase II-2 chain A; Serine carboxypeptidase II-2 chain B] (Fragment) - Hordeum vulgare (Barley)highly similar t…	Folding, sorting and degradation	3.28532e+16	417.754	0.0107253	0.0155143	5.91638e-13	1.12307e-11	0.0185512	0.388158
SC	d1265.a1	GRMZM2G125054_P01	Zm00001d037438	moderately similar to ( 281) AT3G25680 | Symbols: | FUNCTIONS IN: molecular_function unknown; INVOLVED IN: biological_process unknown; LOCATED IN: chloroplast; EXPRESSED IN: 21 plant structures; EXPRESSED DURING: 13 growth stages; CONTAINS InterPro DOMAIN/s: S-layer homology region (InterPro:IPR001119); BEST Arabidopsis thaliana protein match is: unknown protein (TAIR:AT5G23890.1); Has 2048 Blast…	notassigned	3.23022e+16	211.399	2.51256e-05	4.8633e-05	0.657397	0.75032	0.373278	1
SC	c768.a1	GRMZM2G081682_P01	Zm00001d022490	highly similar to ( 746) AT5G57655 | Symbols: | xylose isomerase family protein | chr5:23347030-23349805 FORWARDhighly similar to ( 837) XYLA_HORVU Xylose isomerase (EC 5.3.1.5) - Hordeum vulgare (Barley)highly similar to ( 870) loc_os07g47290 12007.m29315 protein xylose isomerase, putative, expressed seq=cds; coord=7:172159343..172164107:-1; parent_gene=GRMZM2G081682	Carbohydrate metabolism	3.21177e+16	19.6248	0	0	0.00144765	0.00626541	0.152519	0.920617
SC	c522.a3	GRMZM2G130062_P01	Zm00001d023243	highly similar to ( 752) AT1G74040 | Symbols: IMS1, MAML-3, IPMS2 | IMS1 (2-ISOPROPYLMALATE SYNTHASE 1); 2-isopropylmalate synthase | chr1:27842258-27845566 FORWARDhighly similar to ( 615) LEU1_SOYBN Probable 2-isopropylmalate synthase (EC 2.3.3.13) (Alpha-isopropylmalate synthase) (Alpha-IPM synthetase) (Late nodulin 56) (N-56) - Glycine max (Soybean)highly similar to ( 962) loc_os12g04440 12012…	AminoAcid metabolism	3.18008e+16	53.8091	1.79054e-09	5.13889e-09	0.0372926	0.0875283	0.735444	1
SC	c887.a1	GRMZM2G064914_P03	Zm00001d042512	moderately similar to ( 268) AT2G39780 | Symbols: RNS2 | RNS2 (RIBONUCLEASE 2); RNA binding / endoribonuclease/ ribonuclease T2 | chr2:16591256-16593515 FORWARDmoderately similar to ( 424) loc_os01g67180 12001.m12821 protein ribonuclease 2 precursor, putative, expressed seq=cds; coord=3:167686905..167690778:1; parent_gene=GRMZM2G064914	Transcription	2.94485e+16	1228.36	0	0	0.0174013	0.0491597	0.964431	1
SC	c245.a6	GRMZM2G416552_P01	NA	NA	NA	2.79947e+16	338.116	0.0556436	0.0721034	0	0	0.0059298	0.21332
SC	d1079.a1	GRMZM2G301932_P01	Zm00001d022326	moderately similar to ( 268) AT5G23530 | Symbols: AtCXE18 | AtCXE18 (Arabidopsis thaliana carboxyesterase 18); carboxylesterase | chr5:7933366-7934373 REVERSEmoderately similar to ( 201) GID1_ORYSA Gibberellin receptor GID1 (EC 3.-.-.-) (Gibberellin-insensitive dwarf protein 1) (Protein GIBBERELLIN INSENSITIVE DWARF1) - Oryza sativa (Rice)moderately similar to ( 415) loc_os07g44890 12007.m08710 p…	Xenobiotics degradation and metabolism	2.64157e+16	3.82096	0.61145	0.646714	1.63936e-06	1.31962e-05	0.0898456	0.771531
SC	c545.a1	GRMZM2G339563_P01	Zm00001d027656	highly similar to ( 738) AT3G44880 | Symbols: ACD1, LLS1, PAO | ACD1 (ACCELERATED CELL DEATH 1); iron-sulfur cluster binding / pheophorbide a oxygenase | chr3:16383858-16386204 FORWARDvery weakly similar to (85.5) CAO_ORYSA Chlorophyllide a oxygenase, chloroplast precursor (EC 1.13.12.14) (Chlorophyll a oxygenase) (Chlorophyll b synthase) - Oryza sativa (Rice)highly similar to ( 921) loc_os03g053…	Cell growth and death	2.52975e+16	612.364	0.194481	0.230986	0.000397937	0.00202144	0.50787	1
SC	b31.b19	GRMZM2G029262_P01*	Zm00001d031024	moderately similar to ( 499) AT1G79230 | Symbols: ST1, ATMST1, MST1, ATRDH1 | MST1 (MERCAPTOPYRUVATE SULFURTRANSFERASE 1); 3-mercaptopyruvate sulfurtransferase/ sulfurtransferase/ thiosulfate sulfurtransferase | chr1:29801358-29803679 FORWARDhighly similar to ( 605) loc_os12g41500 12012.m07931 protein thiosulfate sulfurtransferase, putative, expressed seq=cds; coord=1:172122476..172128491:-1; par…	AminoAcid metabolism	2.44813e+16	6.01315	0.000295282	0.000511193	0.951437	0.968718	0.856864	1
SC	c903.a1	GRMZM2G116135_P01	Zm00001d044287	moderately similar to ( 244) AT3G16780 | Symbols: | 60S ribosomal protein L19 (RPL19B) | chr3:5708982-5710249 FORWARDweakly similar to ( 103) RL19_MAIZE 60S ribosomal protein L19 (Fragment) - Zea mays (Maize)moderately similar to ( 270) loc_os03g21940 12003.m07598 protein 60S ribosomal protein L19-3, putative, expressed seq=cds; coord=3:220506759..220509488:1; parent_gene=GRMZM2G116135	Translation	1.98272e+16	30.5849	0	0	0.0210462	0.0570726	0.783309	1
SC	c796.a2	GRMZM2G096123_P01*	Zm00001d006844	moderately similar to ( 230) AT1G70600 | Symbols: | structural constituent of ribosome | chr1:26621168-26621608 REVERSEmoderately similar to ( 248) loc_os03g29460 12003.m08219 protein 60S ribosomal protein L27a-3, putative, expressed seq=cds; coord=2:210956263..210959602:-1; parent_gene=GRMZM2G096123	Translation	1.92791e+16	10.0092	2.04807e-06	4.44091e-06	8.919e-06	6.52051e-05	0.228895	1
SC	d1200.a1	GRMZM2G036034_P01	Zm00001d007758	nearly identical (1321) AT4G34450 | Symbols: | coatomer gamma-2 subunit, putative / gamma-2 coat protein, putative / gamma-2 COP, putative | chr4:16471956-16476795 FORWARDnearly identical (1536) loc_os07g10150 12007.m05470 protein coatomer subunit gamma, putative, expressed seq=cds; coord=2:232101270..232109417:-1; parent_gene=GRMZM2G036034	Transport and catabolism	1.88375e+16	3.99967	0.82569	0.850854	0.0441279	0.0983593	0.163405	0.955288
SC	d1160.a1	GRMZM2G043295_P01	Zm00001d047504	moderately similar to ( 301) AT3G16520 | Symbols: UGT88A1 | UDP-glucoronosyl/UDP-glucosyl transferase family protein | chr3:5618847-5620833 REVERSEweakly similar to ( 165) ZOX_PHAVU Zeatin O-xylosyltransferase (EC 2.4.2.40) (Zeatin O-beta-D-xylosyltransferase) - Phaseolus vulgaris (Kidney bean) (French bean)highly similar to ( 568) loc_os01g53350 12001.m150707 protein anthocyanidin 5,3-O-glucosyl…	Carbohydrate metabolism	1.86951e+16	54.7369	2.79099e-09	7.84377e-09	6.62626e-12	1.0863e-10	0.440072	1
SC	c914.a2	GRMZM2G373522_P01	Zm00001d051420	weakly similar to ( 127) CO410_WHEAT Dehydrin COR410 (Cold-induced COR410 protein) - Triticum aestivum (Wheat)weakly similar to ( 124) loc_os02g44870 12002.m09527 protein dehydrin COR410, putative, expressed seq=cds; coord=4:154310162..154311883:-1; parent_gene=GRMZM2G373522	notassigned	1.7434e+16	35.5533	0	0	0.0098327	0.0309273	0.00331166	0.162874
SC	d1010.a2	GRMZM2G146965_P01	Zm00001d033554	weakly similar to ( 198) AT1G47420 | Symbols: | FUNCTIONS IN: molecular_function unknown; INVOLVED IN: biological_process unknown; LOCATED IN: mitochondrion, nucleus; EXPRESSED IN: 26 plant structures; EXPRESSED DURING: 15 growth stages; BEST Arabidopsis thaliana protein match is: GAMMA CA2 (GAMMA CARBONIC ANHYDRASE 2); carbonate dehydratase (TAIR:AT1G47260.1); Has 85 Blast hits to 85 proteins in…	notassigned	1.56017e+16	6.74534	0	0	0.321154	0.448279	0.305471	1
SC	d1150.a1	GRMZM2G107562_P01	Zm00001d021850	weakly similar to ( 134) AT5G26330 | Symbols: | plastocyanin-like domain-containing protein / mavicyanin, putative | chr5:9241614-9242635 REVERSEvery weakly similar to (97.8) BCP_PEA Blue copper protein precursor - Pisum sativum (Garden pea)weakly similar to ( 157) loc_os07g38290 12007.m08076 protein copper ion binding protein, putative, expressed seq=cds; coord=7:159130478..159136959:-1; parent_…	misc	1.54486e+16	4.99906	0.0943079	0.118377	0.000301413	0.00159087	0.830882	1
SC	d1200.a2	GRMZM2G178618_P01	Zm00001d019106	nearly identical (1351) AT4G34450 | Symbols: | coatomer gamma-2 subunit, putative / gamma-2 coat protein, putative / gamma-2 COP, putative | chr4:16471956-16476795 FORWARDnearly identical (1544) loc_os07g10150 12007.m05470 protein coatomer subunit gamma, putative, expressed seq=cds; coord=7:16333547..16341224:1; parent_gene=GRMZM2G178618	Transport and catabolism	1.30773e+16	3.18024	0.213682	0.252681	0.0433887	0.0978054	0.0962518	0.790449
SC	d1512.a1	GRMZM5G815098_P01*	Zm00001d048660	very weakly similar to (82.4) IBB3_WHEAT Bowman-Birk type trypsin inhibitor (WTI) - Triticum aestivum (Wheat)very weakly similar to (85.9) loc_os03g60840 12003.m10972 protein Bowman-Birk type trypsin inhibitor, putative, expressed seq=cds; coord=4:2296963..2327137:1; parent_gene=GRMZM5G815098	notassigned	1.25075e+16	502.324	1.03118e-09	3.01552e-09	0	0	2.10796e-10	7.60271e-08
SC	d1070.a1	CUFF.60390_44651174_44652120_PAVcov_1387_scaffold19481|Frame-3|Orf*	NA	NA	NA	1.17278e+16	10.088	0.00069194	0.00114652	0	0	0.512412	1
SC	c347.a3	GRMZM2G085000_P03	Zm00001d049939	moderately similar to ( 312) AT5G03880 | Symbols: | electron carrier | chr5:1038674-1041453 REVERSEmoderately similar to ( 357) loc_os08g44400 12008.m080235 protein glutathione S-transferase, N-terminal domain containing protein, expressed seq=cds; coord=4:52014184..52017502:-1; parent_gene=GRMZM2G085000	notassigned	1.14101e+16	6.96082	0.000313178	0.000540445	0.385011	0.50679	0.469382	1
SC	d1258.a1	GRMZM2G315088_P01*	Zm00001d049904	weakly similar to ( 182) AT3G49910 | Symbols: | 60S ribosomal protein L26 (RPL26A) | chr3:18504311-18504751 FORWARDweakly similar to ( 166) RL26_BRARA 60S ribosomal protein L26 - Brassica rapa (Turnip)moderately similar to ( 208) loc_os12g05430 12012.m04536 protein 60S ribosomal protein L26-1, putative, expressed seq=cds; coord=3:19669523..19670484:-1; parent_gene=GRMZM2G327564	Translation	1.13601e+16	45.5921	0	0	0.935351	0.956073	0.938837	1
SC	c954.a1	GRMZM2G308687_P01	Zm00001d034356	moderately similar to ( 229) AT1G78380 | Symbols: ATGSTU19, GST8 | ATGSTU19 (GLUTATHIONE S-TRANSFERASE TAU 19); glutathione binding / glutathione transferase | chr1:29486659-29487819 REVERSEmoderately similar to ( 279) GSTU1_ORYSA Probable glutathione S-transferase GSTU1 (EC 2.5.1.18) - Oryza sativa (Rice)moderately similar to ( 279) loc_os03g57200 12003.m10639 protein glutathione S-transferase p…	misc	1.08457e+16	77.1507	0	0	3.81753e-07	3.38571e-06	0.828869	1
SC	d1236.a1	GRMZM2G057942_P01*	Zm00001d044102	moderately similar to ( 496) AT5G60160 | Symbols: | aspartyl aminopeptidase, putative | chr5:24223887-24226783 REVERSEhighly similar to ( 581) loc_os12g13390 12012.m073796 protein aspartyl aminopeptidase, putative, expressed seq=cds; coord=3:215590446..215594970:1; parent_gene=GRMZM2G057942	Folding, sorting and degradation	9154685835868740	33.9371	1.82781e-05	3.61553e-05	0.570027	0.671862	0.654932	1
SC	d1534.a1	GRMZM2G110023_P01	Zm00001d028414	weakly similar to ( 191) AT4G25370 | Symbols: | Clp amino terminal domain-containing protein | chr4:12972747-12974580 FORWARDmoderately similar to ( 311) loc_os03g14280 12003.m06870 protein ATP-dependent Clp protease ATP-binding subunit clpA, putative, expressed seq=cds; coord=1:33825379..33831090:-1; parent_gene=GRMZM2G110023	Folding, sorting and degradation	8979631445914330	4805.57	2.3731e-05	4.60985e-05	0.110317	0.204039	0.29269	1
SC	d1056.a1	GRMZM2G118286_P01	Zm00001d023538	highly similar to ( 986) AT1G77590 | Symbols: LACS9 | LACS9 (LONG CHAIN ACYL-COA SYNTHETASE 9); long-chain-fatty-acid-CoA ligase | chr1:29148501-29151776 REVERSEnearly identical (1214) loc_os12g07110 12012.m26736 protein acyl-CoA synthetase long-chain family member 3, putative, expressed seq=cds; coord=10:9379084..9402965:1; parent_gene=GRMZM2G118286	Lipid metabolism	8212462635539220	11638.1	0.0165086	0.023078	0.00126519	0.00563347	0.881563	1
SC	d1283.a1	GRMZM2G023840_P01	Zm00001d009373	moderately similar to ( 476) AT5G66390 | Symbols: | peroxidase 72 (PER72) (P72) (PRXR8) | chr5:26516063-26517329 REVERSEmoderately similar to ( 301) PER2_ORYSA Peroxidase 2 precursor (EC 1.11.1.7) - Oryza sativa (Rice)highly similar to ( 575) loc_os01g36240 12001.m09920 protein peroxidase 72 precursor, putative, expressed seq=cds; coord=8:59973029..59975575:1; parent_gene=GRMZM2G023840	Carbohydrate metabolism	7615246778189360	5.65161	0.00493145	0.00743151	0.0930577	0.179194	0.78999	1
SC	d1181.a1	GRMZM2G075502_P01	Zm00001d029126	very weakly similar to (80.9) AT3G06130 | Symbols: | heavy-metal-associated domain-containing protein | chr3:1853048-1854673 REVERSEweakly similar to ( 124) loc_os03g22490 12003.m101339 protein heavy metal-associated domain containing protein, expressed seq=cds; coord=1:58472623..58474707:-1; parent_gene=GRMZM2G075502	metal handling	6743826084594910	213.168	0.237648	0.277684	0.012989	0.0385044	0.746594	1
SC	d1447.a1	GRMZM2G134731_P01	Zm00001d047037	moderately similar to ( 213) AT5G46790 | Symbols: | unknown protein | chr5:18984063-18984728 REVERSEmoderately similar to ( 301) loc_os10g42280 12010.m06985 protein cyclase/dehydrase family protein, putative, expressed seq=cds; coord=9:112940269..112941580:1; parent_gene=GRMZM2G134731	notassigned	6628343888588290	43.5555	0	0	1.05245e-06	8.69279e-06	0.033595	0.497942
SC	d1544.a1	GRMZM2G025977_P01*	Zm00001d018820	moderately similar to ( 343) AT5G67290 | Symbols: | FAD-dependent oxidoreductase family protein | chr5:26848419-26849755 REVERSEhighly similar to ( 546) loc_os07g06080 12007.m05071 protein D-amino acid oxidase, putative, expressed seq=cds; coord=7:6064236..6068299:1; parent_gene=GRMZM2G025977	misc	5143083409840440	6.46926	1.11022e-16	5.43557e-16	0.171029	0.290965	0.261073	1
SC	d1281.a1	GRMZM2G364748_P01	Zm00001d024379	moderately similar to ( 253) AT5G57540 | Symbols: | xyloglucan:xyloglucosyl transferase, putative / xyloglucan endotransglycosylase, putative / endo-xyloglucan transferase, putative | chr5:23302996-23304049 REVERSEmoderately similar to ( 375) XTH8_ORYSA Xyloglucan endotransglycosylase/hydrolase protein 8 precursor (EC 2.4.1.207) (End-xyloglucan transferase) (OsXTH8) (OsXRT5) - Oryza sativa (Rice)…	Carbohydrate metabolism	5100965780487820	9.11071	0	0	0.0227401	0.061054	0.103128	0.80277
SC	d1389.a1	AC207890.3_FGP002	Zm00001d050606	nearly identical (1254) AT5G07350 | Symbols: | tudor domain-containing protein / nuclease family protein | chr5:2319790-2324892 REVERSEnearly identical (1683) loc_os02g32350 12002.m33392 protein 4SNc-Tudor domain protein, putative, expressed seq=cds; coord=4:94432879..94438375:1; parent_gene=AC207890.3_FG002	Transcription	4775458561075220	294.587	0.0038188	0.00582785	0.00942933	0.0299195	0.169195	0.971918
SC	d1516.a1	GRMZM2G402631_P01	Zm00001d031158	weakly similar to ( 134) AT4G11650 | Symbols: ATOSM34 | ATOSM34 (osmotin 34) | chr4:7025127-7026113 REVERSEmoderately similar to ( 257) TLP_ORYSA Thaumatin-like protein precursor - Oryza sativa (Rice)moderately similar to ( 257) loc_os12g43380 12012.m08112 protein thaumatin-like protein precursor, putative, expressed seq=cds; coord=1:178008019..178008996:-1; parent_gene=GRMZM2G402631	Environmental adaptation	4726950272642590	241.679	5.30287e-12	1.82821e-11	8.0952e-11	1.16787e-09	0.0256607	0.46937
SC	d1269.a1	GRMZM2G158595_P01	Zm00001d045897	highly similar to ( 911) AT5G13030 | Symbols: | unknown protein | chr5:4133216-4136461 FORWARDnearly identical (1031) loc_os06g21600 12006.m06817 protein selenoprotein O, putative, expressed seq=cds; coord=9:44480056..44486772:-1; parent_gene=GRMZM2G158595	notassigned	4607845684156860	5.37204	0.060062	0.0773656	0.974826	0.987604	0.824231	1
SC	d1161.a1	GRMZM2G079440_P01	Zm00001d037894	weakly similar to ( 124) DHN1_MAIZE Dehydrin DHN1 (M3) (RAB-17 protein) - Zea mays (Maize) seq=cds; coord=6:137142553..137144384:-1; parent_gene=GRMZM2G079440	notassigned	4540120061494600	16.1646	0	0	0.00995806	0.0311405	0.0145403	0.354317
SC	c469.a2	GRMZM2G010743_P01	Zm00001d050637	moderately similar to ( 235) AT5G24650 | Symbols: | mitochondrial import inner membrane translocase subunit Tim17/Tim22/Tim23 family protein | chr5:8437123-8438859 FORWARDmoderately similar to ( 334) loc_os04g33220 12004.m08417 protein SAM domain family protein, expressed seq=cds; coord=4:105098023..105100902:1; parent_gene=GRMZM2G010743	Folding, sorting and degradation	3770535007553120	2.67386	1.55431e-15	7.09606e-15	0.32176	0.448279	0.938378	1
SC	d1659.a1	GRMZM2G074567_P01	Zm00001d005461	moderately similar to ( 409) AT2G30050 | Symbols: | transducin family protein / WD-40 repeat family protein | chr2:12825540-12826448 FORWARDhighly similar to ( 540) loc_os07g14280 12007.m05873 protein SEC13-related protein, putative, expressed seq=cds; coord=2:170296225..170299574:-1; parent_gene=GRMZM2G074567	Folding, sorting and degradation	3714531998381690	68.6605	4.85402e-06	1.01001e-05	0.44108	0.552372	0.0282439	0.46937
SC	c643.a4	GRMZM2G020631_P01	Zm00001d031666	highly similar to ( 542) AT1G60710 | Symbols: ATB2 | ATB2; oxidoreductase | chr1:22355073-22356627 REVERSEhighly similar to ( 508) IN22_MAIZE IN2-2 protein - Zea mays (Maize)highly similar to ( 607) loc_os04g26910 12004.m07816 protein auxin-induced protein PCNT115, putative, expressed seq=cds; coord=1:195752951..195756226:-1; parent_gene=GRMZM2G020631	Chemical structure transformation maps	3476408568801160	10.6763	4.24116e-12	1.4803e-11	0.000492349	0.00242146	0.0468402	0.586395
SC	d1667.a1	GRMZM2G092474_P01	Zm00001d043121	moderately similar to ( 233) AT4G11650 | Symbols: ATOSM34 | ATOSM34 (osmotin 34) | chr4:7025127-7026113 REVERSEmoderately similar to ( 255) ZEAM_MAIZE Zeamatin precursor - Zea mays (Maize)moderately similar to ( 306) loc_os12g43490 12012.m08122 protein alpha-amylase/trypsin inhibitor, putative, expressed seq=cds; coord=3:186793464..186794596:-1; parent_gene=GRMZM2G092474	Environmental adaptation	3075063276176220	147.603	3.94405e-11	1.27008e-10	0.0891537	0.174349	0.0359713	0.518449
SC	c916.a1	GRMZM2G141473_P01	Zm00001d034388	nearly identical (1358) AT5G20960 | Symbols: AAO1, AO1, ATAO, ATAO1 | AAO1 (ARABIDOPSIS ALDEHYDE OXIDASE 1); aldehyde oxidase/ indole-3-acetaldehyde oxidase | chr5:7116783-7122338 FORWARDnearly identical (2069) ALDO2_ORYSA Probable aldehyde oxidase 2 (EC 1.2.3.1) (AO-2) - Oryza sativa (Rice)nearly identical (2069) loc_os03g57690 12003.m10683 protein aldehyde oxidase 1, putative, expressed seq=cds…	Chemical structure transformation maps	2987665071573360	92.1616	0	0	0.00234565	0.00936531	0.852754	1
SC	d1255.a1	GRMZM2G415793_P01	Zm00001d047340	moderately similar to ( 238) AT3G25780 | Symbols: AOC3 | AOC3 (ALLENE OXIDE CYCLASE 3); allene-oxide cyclase | chr3:9409362-9410409 FORWARDmoderately similar to ( 337) loc_os03g32314 12003.m08473 protein allene oxide cyclase 4, chloroplast precursor, putative, expressed seq=cds; coord=9:124917394..124918766:-1; parent_gene=GRMZM2G415793	Chemical structure transformation maps	2032575720445890	4382.53	0	0	0	0	0.00100885	0.0727715
SC	d1375.a1	GRMZM2G469969_P01	Zm00001d004956	highly similar to ( 760) AT3G47930 | Symbols: ATGLDH | ATGLDH (L-GALACTONO-1,4-LACTONE DEHYDOROGENASE); L-gulono-1,4-lactone dehydrogenase/ galactonolactone dehydrogenase | chr3:17684500-17686940 FORWARDhighly similar to ( 908) loc_os11g04740 12011.m04672 protein L-Galactono-1,4-lactone dehydrogenase, putative, expressed seq=cds; coord=2:146014950..146019348:1; parent_gene=GRMZM2G469969	Metabolism of other amino acids	1787551369262400	462.566	0.258131	0.299034	0.0438993	0.0981384	0.331384	1
SC	c643.a2	GRMZM2G176903_P01*	Zm00001d044212	moderately similar to ( 328) AT1G60690 | Symbols: | aldo/keto reductase family protein | chr1:22349892-22351668 REVERSEmoderately similar to ( 304) A115_TOBAC Auxin-induced protein PCNT115 - Nicotiana tabacum (Common tobacco)highly similar to ( 504) loc_os01g43090 12001.m10572 protein auxin-induced protein PCNT115, putative, expressed seq=cds; coord=3:218323126..218325508:1; parent_gene=GRMZM2G17…	Chemical structure transformation maps	1717295284440310	7912.57	0.265723	0.306844	0.000924304	0.00420209	0.056905	0.607436
SC	d1115.a2	AC230013.2_FGP007*	Zm00001d043942	moderately similar to ( 327) AT2G34480 | Symbols: | 60S ribosomal protein L18A (RPL18aB) | chr2:14532916-14534161 REVERSEmoderately similar to ( 352) RL18A_ORYSA 60S ribosomal protein L18a - Oryza sativa (Rice)moderately similar to ( 360) loc_os05g49030 12005.m08974 protein 60S ribosomal protein L18a, putative, expressed seq=cds; coord=8:149220935..149222561:-1; parent_gene=GRMZM2G126928	Translation	1704672784515550	16.1295	0.000169633	0.00030188	0.0304994	0.074464	0.886104	1
SC	d1245.a1	GRMZM2G145133_P01*	Zm00001d018529	moderately similar to ( 454) AT3G19990 | Symbols: | unknown protein | chr3:6965671-6967102 FORWARDhighly similar to ( 615) loc_os02g58150 12002.m77864 protein expressed protein seq=cds; coord=5:216598122..216599835:1; parent_gene=GRMZM2G145133	notassigned	1628289610758880	6.39479	0.240808	0.280468	0.00536167	0.0186538	0.770317	1
SC	d1086.a1	GRMZM2G032049_P01	Zm00001d008846	nearly identical (1096) AT1G25350 | Symbols: OVA9 | OVA9 (ovule abortion 9); glutamine-tRNA ligase | chr1:8889280-8894205 REVERSEnearly identical (1134) SYQ_LUPLU Glutaminyl-tRNA synthetase (EC 6.1.1.18) (Glutamine--tRNA ligase) (GlnRS) - Lupinus luteus (European yellow lupin)nearly identical (1384) loc_os01g09000 12001.m07525 protein glutaminyl-tRNA synthetase, putative, expressed seq=cds; coord…	Translation	1373088336034100	29.0603	4.9921e-07	1.15663e-06	0.194352	0.317466	0.722718	1
SC	d1353.a2	GRMZM2G059151_P01	Zm00001d037278	highly similar to ( 892) AT1G12000 | Symbols: | pyrophosphate--fructose-6-phosphate 1-phosphotransferase beta subunit, putative / pyrophosphate-dependent 6-phosphofructose-1-kinase, putative | chr1:4050159-4053727 REVERSEhighly similar to ( 903) PFPB_RICCO Pyrophosphate--fructose 6-phosphate 1-phosphotransferase subunit beta (EC 2.7.1.90) (PFP) (6-phosphofructokinase, pyrophosphate dependent) (Py…	Carbohydrate metabolism	872007664206376	84.0842	0.0151538	0.0214053	3.47554e-06	2.61148e-05	0.660049	1
SC	c958.a1	GRMZM2G164020_P01*	Zm00001d034479	very weakly similar to (90.5) AT1G06760 | Symbols: | histone H1, putative | chr1:2076687-2077616 REVERSEweakly similar to ( 126) H1_MAIZE Histone H1 - Zea mays (Maize)weakly similar to ( 117) loc_os03g58470 12003.m10753 protein histone H1, putative, expressed seq=cds; coord=1:288732967..288734700:1; parent_gene=GRMZM2G164020	Replication and repair	566272893771498	189751	2.11257e-05	4.14094e-05	0.00377929	0.0138148	0.375543	1
SC	d1104.a1	GRMZM2G179301_P02*	Zm00001d038136	moderately similar to ( 288) AT3G23600 | Symbols: | dienelactone hydrolase family protein | chr3:8473833-8475655 FORWARDweakly similar to ( 170) E134_MAIZE Endo-1,3;1,4-beta-D-glucanase precursor (EC 3.2.1.-) - Zea mays (Maize)moderately similar to ( 371) loc_os05g33100 12005.m07542 protein endo-1,3;1,4-beta-D-glucanase precursor, putative, expressed seq=cds; coord=6:145087624..145092201:1; paren…	misc	472449228381802	27.0791	0	0	0.0235934	0.0624158	0.527504	1
SC	d1449.a1	GRMZM2G082007_P01	Zm00001d051870	moderately similar to ( 388) AT3G53140 | Symbols: | O-diphenol-O-methyl transferase, putative | chr3:19695692-19697355 FORWARDmoderately similar to ( 210) COMT1_SACOF Caffeic acid 3-O-methyltransferase (EC 2.1.1.68) (S-adenosysl-L-methionine:caffeic acid 3-O-methyltransferase) (COMT) (CAOMT) - Saccharum officinarum (Sugarcane)highly similar to ( 551) loc_os02g57760 12002.m10797 protein caffeic ac…	Biosynthesis of other secondary metabolites	441315904470004	31.6915	1.04872e-12	3.89935e-12	0.089208	0.174349	0.643762	1
SC	d1115.a1	GRMZM2G113720_P01	Zm00001d009579	moderately similar to ( 327) AT2G34480 | Symbols: | 60S ribosomal protein L18A (RPL18aB) | chr2:14532916-14534161 REVERSEmoderately similar to ( 353) RL18A_ORYSA 60S ribosomal protein L18a - Oryza sativa (Rice)moderately similar to ( 360) loc_os05g49030 12005.m08974 protein 60S ribosomal protein L18a, putative, expressed seq=cds; coord=8:70511037..70513637:1; parent_gene=GRMZM2G113720	Translation	438721838094976	7.72066	2.89748e-06	6.14719e-06	0.86665	0.907955	0.929097	1
SC	d1215.a1	GRMZM2G088627_P01	Zm00001d031473	highly similar to ( 530) AT4G38220 | Symbols: | aminoacylase, putative / N-acyl-L-amino-acid amidohydrolase, putative | chr4:17925251-17926919 FORWARDhighly similar to ( 686) loc_os08g40110 12008.m07991 protein aminoacylase-1, putative, expressed seq=cds; coord=1:189145769..189150346:-1; parent_gene=GRMZM2G088627	misc	400369413858754	11.9259	9.13714e-14	3.68895e-13	0.540185	0.644411	0.682483	1
SC	c347.a1	GRMZM2G022866_P02	Zm00001d031945	moderately similar to ( 382) AT5G03880 | Symbols: | electron carrier | chr5:1038674-1041453 REVERSEmoderately similar to ( 433) loc_os08g44400 12008.m080235 protein glutathione S-transferase, N-terminal domain containing protein, expressed seq=cds; coord=1:204867145..204870273:-1; parent_gene=GRMZM2G022866	notassigned	352684400273474	157.36	0.0036523	0.00559743	0	0	0.395503	1
SC	d1104.a2	GRMZM2G179301_P01	Zm00001d038136	moderately similar to ( 234) AT3G23600 | Symbols: | dienelactone hydrolase family protein | chr3:8473833-8475655 FORWARDweakly similar to ( 132) E134_MAIZE Endo-1,3;1,4-beta-D-glucanase precursor (EC 3.2.1.-) - Zea mays (Maize)moderately similar to ( 293) loc_os05g33100 12005.m07542 protein endo-1,3;1,4-beta-D-glucanase precursor, putative, expressed seq=cds; coord=6:145087390..145092573:1; paren…	misc	218042135239415	47.9073	0	0	0.0669226	0.138983	0.509944	1
SC	c643.a3	GRMZM2G052812_P02*	Zm00001d036024	moderately similar to ( 410) AT1G60710 | Symbols: ATB2 | ATB2; oxidoreductase | chr1:22355073-22356627 REVERSEmoderately similar to ( 442) IN22_MAIZE IN2-2 protein - Zea mays (Maize)moderately similar to ( 469) loc_os04g26910 12004.m07816 protein auxin-induced protein PCNT115, putative, expressed seq=cds; coord=6:63919594..63950765:1; parent_gene=GRMZM2G052812	Chemical structure transformation maps	207121899581728	110.657	0	0	0.0616588	0.130813	0.357459	1
SC	c493.a2	GRMZM2G318780_P02	Zm00001d029091	nearly identical (1353) AT4G02280 | Symbols: SUS3, ATSUS3 | SUS3 (sucrose synthase 3); UDP-glycosyltransferase/ sucrose synthase/ transferase, transferring glycosyl groups | chr4:995166-998719 FORWARDnearly identical (1333) SUS2_PEA Sucrose synthase 2 (EC 2.4.1.13) (Sucrose-UDP glucosyltransferase 2) - Pisum sativum (Garden pea)nearly identical (1565) loc_os03g22120 12003.m34861 protein sucrose s…	Carbohydrate metabolism	8.21435e+07	125.089	0	0	4.44089e-16	1.23206e-14	9.02053e-08	1.39432e-05
SC	c585.a2	GRMZM2G099454_P03	Zm00001d027524	moderately similar to ( 297) AT3G12500 | Symbols: ATHCHIB, PR3, PR-3, CHI-B, B-CHI | ATHCHIB (ARABIDOPSIS THALIANA BASIC CHITINASE); chitinase | chr3:3962501-3963945 REVERSEmoderately similar to ( 313) CHI2_PEA Endochitinase A2 precursor (EC 3.2.1.14) - Pisum sativum (Garden pea)moderately similar to ( 394) loc_os03g04060 12003.m05938 protein basic endochitinase C precursor, putative, expressed s…	Environmental adaptation	609987	12.2718	0.00620702	0.00922527	5.5465e-09	6.38437e-08	0.0825655	0.726308
SC	c613.a2	GRMZM2G073312_P01	Zm00001d036785	nearly identical (1598) AT5G42390 | Symbols: | metalloendopeptidase | chr5:16945308-16952647 FORWARDnearly identical (2070) loc_os06g41990 12006.m32119 protein metalloendopeptidase, putative, expressed seq=cds; coord=6:98000549..98014552:1; parent_gene=GRMZM2G073312	Folding, sorting and degradation	578985	29.2343	7.97669e-09	2.15232e-08	0.00313188	0.0117256	0.372366	1
SC	c548.a2	GRMZM2G163421_P01	Zm00001d007301	highly similar to ( 546) AT1G21750 | Symbols: ATPDIL1-1 | ATPDIL1-1 (PDI-LIKE 1-1); protein disulfide isomerase | chr1:7645767-7648695 FORWARDhighly similar to ( 817) PDI_MAIZE Protein disulfide-isomerase precursor (EC 5.3.4.1) (PDI) - Zea mays (Maize)highly similar to ( 778) loc_os11g09280 12011.m28750 protein OsPDIL1-1 - Oryza sativa protein disulfide isomerase, expressed seq=cds; coord=2:22053…	Folding, sorting and degradation	558706	2648.95	0.797355	0.824009	0.0765676	0.154276	0.652281	1
SC	c854.a1	GRMZM2G078324_P01	Zm00001d018467	seq=cds; coord=5:215486936..215487987:1; parent_gene=GRMZM2G078324	notassigned	438399	1452.51	0.192018	0.228312	1.62046e-07	1.49858e-06	0.542655	1
SC	d1177.a1	GRMZM2G012404_P01	Zm00001d003430	highly similar to ( 563) AT3G02660 | Symbols: emb2768 | emb2768 (EMBRYO DEFECTIVE 2768); ATP binding / RNA binding / aminoacyl-tRNA ligase/ nucleotide binding / tyrosine-tRNA ligase | chr3:570221-571756 REVERSEhighly similar to ( 716) loc_os01g31610 12001.m09490 protein tyrosyl-tRNA synthetase, putative, expressed seq=cds; coord=2:42356883..42358662:1; parent_gene=GRMZM2G012404	Translation	292085	30495.6	0.238337	0.278189	1.75805e-05	0.000121937	0.857191	1
SC	c827.a1	GRMZM2G086845_P01	Zm00001d042536	moderately similar to ( 469) AT2G31390 | Symbols: | pfkB-type carbohydrate kinase family protein | chr2:13383635-13386116 REVERSEhighly similar to ( 604) SCRK1_MAIZE Fructokinase-1 (EC 2.7.1.4) (ZmFRK1) - Zea mays (Maize)highly similar to ( 565) loc_os01g66940 12001.m12799 protein fructokinase-1, putative, expressed seq=cds; coord=3:168523033..168526394:1; parent_gene=GRMZM2G086845	Carbohydrate metabolism	226231	196.4	0	0	2.01539e-08	2.10017e-07	0.0474393	0.586395
SC	b50.a5	GRMZM2G120517_P02*	Zm00001d003643	moderately similar to ( 468) AT1G77490 | Symbols: TAPX | TAPX (THYLAKOIDAL ASCORBATE PEROXIDASE); L-ascorbate peroxidase | chr1:29117688-29120046 FORWARDhighly similar to ( 511) APX7_ORYSA Probable L-ascorbate peroxidase 7, chloroplast precursor (EC 1.11.1.11) (OsAPx07) - Oryza sativa (Rice)highly similar to ( 511) loc_os04g35520 12004.m101533 protein OsAPx7 - Stromal Ascorbate Peroxidase encodin…	Metabolism of other amino acids	197071	31.188	0	0	2.74351e-10	3.659e-09	0.753243	1
SC	d1102.a1	GRMZM2G135588_P01	Zm00001d016248	highly similar to ( 796) AT3G58750 | Symbols: CSY2 | CSY2 (citrate synthase 2); citrate (SI)-synthase | chr3:21724564-21727458 REVERSEhighly similar to ( 795) CYSZ_CUCMA Citrate synthase, glyoxysomal precursor (EC 2.3.3.1) (GCS) - Cucurbita maxima (Pumpkin) (Winter squash)highly similar to ( 867) loc_os02g13840 12002.m06630 protein citrate synthase, glyoxysomal precursor, putative, expressed seq=…	Carbohydrate metabolism	194547	151.537	1.04805e-13	4.21558e-13	3.53991e-06	2.62746e-05	0.310157	1
SC	d1206.a1	EF517601.1_FGP012	Zm00001d040257	NA	NA	173193	33.2872	4.7784e-13	1.83994e-12	0.0637449	0.133667	0.679243	1
SC	d1238.a1	GRMZM2G000510_P03*	Zm00001d048583	moderately similar to ( 416) AT3G54110 | Symbols: ATPUMP1, UCP, PUMP1, ATUCP1, UCP1 | PUMP1 (PLANT UNCOUPLING MITOCHONDRIAL PROTEIN 1); binding / oxidative phosphorylation uncoupler | chr3:20038890-20040996 FORWARDmoderately similar to ( 487) loc_os11g48040 12011.m08602 protein mitochondrial uncoupling protein 3, putative, expressed seq=cds; coord=4:32433..63643:-1; parent_gene=GRMZM2G000510	Membrane transport	159589	618.244	0.00422737	0.00641516	0.0624254	0.131922	0.724927	1
SC	c660.a1	GRMZM2G174807_P03	Zm00001d002690	weakly similar to ( 196) AT4G23400 | Symbols: PIP1D, PIP1;5 | PIP1;5 (PLASMA MEMBRANE INTRINSIC PROTEIN 1;5); water channel | chr4:12220792-12222155 FORWARDmoderately similar to ( 216) PIP11_ORYSA Aquaporin PIP1.1 (Plasma membrane intrinsic protein 1a) (PIP1a) (OsPIP1.1) (Water channel protein RWC1) (RWC-1) - Oryza sativa (Rice)moderately similar to ( 216) loc_os02g44630 12002.m33812 protein aqua…	Membrane transport	131807	24.4229	4.79481e-05	9.06991e-05	0.0173591	0.0491597	0.888043	1
SC	c603.a2	GRMZM5G887303_P01	Zm00001d005558	nearly identical (1114) AT1G09620 | Symbols: | ATP binding / aminoacyl-tRNA ligase/ leucine-tRNA ligase/ nucleotide binding | chr1:3113077-3116455 REVERSEnearly identical (1379) loc_os09g21110 12009.m05318 protein leucyl-tRNA synthetase, cytoplasmic, putative, expressed seq=cds; coord=2:173604553..173607325:-1; parent_gene=GRMZM5G887303	Translation	97828.9	11.7568	0.0478988	0.0622914	0.414357	0.529946	0.0497302	0.602643
SC	b76.a4	GRMZM2G055331_P01	Zm00001d050125	nearly identical (1327) AT5G20280 | Symbols: ATSPS1F | ATSPS1F (sucrose phosphate synthase 1F); sucrose-phosphate synthase/ transferase, transferring glycosyl groups | chr5:6844994-6849997 REVERSEnearly identical (1343) SPS_SOLTU Sucrose-phosphate synthase (EC 2.4.1.14) (UDP-glucose-fructose-phosphate glucosyltransferase) - Solanum tuberosum (Potato)nearly identical (1766) loc_os08g20660 12008.m2…	Carbohydrate metabolism	85153.5	254	0.111381	0.138045	0.986491	0.993403	0.983931	1
SC	c624.a1	GRMZM2G064960_P01*	Zm00001d051635	very weakly similar to (86.7) loc_os02g48480 12002.m09882 protein expressed protein seq=cds; coord=4:162266877..162267773:-1; parent_gene=GRMZM2G064960	notassigned	72387.9	16.8109	0.105824	0.13146	0.031774	0.0767398	0.111479	0.814548
SC	c793.a1	GRMZM2G112524_P02*	Zm00001d028815	weakly similar to ( 167) PR1_ASPOF Pathogenesis-related protein 1 (AOPR1) - Asparagus officinalis (Garden asparagus)moderately similar to ( 280) loc_os03g18850 12003.m07305 protein pathogenesis-related protein 1, putative, expressed seq=cds; coord=1:47172055..47173158:1; parent_gene=GRMZM2G112524	Environmental adaptation	70845.3	173338	0	0	7.83326e-07	6.67369e-06	0.326961	1
SC	c232.a3	GRMZM2G458208_P01	Zm00001d014090	highly similar to ( 603) AT3G23990 | Symbols: HSP60, HSP60-3B | HSP60 (HEAT SHOCK PROTEIN 60); ATP binding | chr3:8669013-8672278 FORWARDhighly similar to ( 684) CH61_MAIZE Chaperonin CPN60-1, mitochondrial precursor (HSP60-1) - Zea mays (Maize)highly similar to ( 652) loc_os10g32550 12010.m06092 protein chaperonin CPN60-1, mitochondrial precursor, putative, expressed seq=cds; coord=5:31002750..3…	Folding, sorting and degradation	61988.6	24.234	1.24072e-10	3.83559e-10	0.654006	0.749612	0.871661	1
SC	c888.a1	GRMZM2G410991_P01	Zm00001d027533	weakly similar to ( 196) AT2G17120 | Symbols: LYM2 | LYM2 (LYSM DOMAIN GPI-ANCHORED PROTEIN 2 PRECURSOR) | chr2:7459156-7460648 FORWARDmoderately similar to ( 374) loc_os03g04110 12003.m101179 protein receptor-like GPI-anchored protein 2, putative, expressed seq=cds; coord=1:7566145..7569296:1; parent_gene=GRMZM2G410991	notassigned	51610	23202.2	0	0	2.03805e-08	2.10017e-07	0.0552797	0.607436
SC	c535.a2	GRMZM2G069458_P01	Zm00001d028207	moderately similar to ( 221) AT2G33040 | Symbols: | ATP synthase gamma chain, mitochondrial (ATPC) | chr2:14018978-14021047 REVERSEmoderately similar to ( 242) ATPG3_IPOBA ATP synthase gamma chain, mitochondrial precursor (EC 3.6.3.14) - Ipomoea batatas (Sweet potato) (Batate)moderately similar to ( 265) loc_os10g17280 12010.m04815 protein ATP synthase gamma chain, mitochondrial precursor, putati…	Energy metabolism	44481.3	10656.9	4.97328e-06	1.03086e-05	1.67866e-13	3.36353e-12	0.343293	1
SC	c570.a1	GRMZM2G018375_P02	Zm00001d011183	moderately similar to ( 479) AT5G54770 | Symbols: THI1, TZ, THI4 | THI1; protein homodimerization | chr5:22246634-22247891 FORWARDhighly similar to ( 638) THI41_MAIZE Thiazole biosynthetic enzyme 1-1, chloroplast precursor - Zea mays (Maize)highly similar to ( 541) loc_os07g34570 12007.m28985 protein thiazole biosynthetic enzyme 1-1, chloroplast precursor, putative, expressed seq=cds; coord=8:138…	Metabolism of cofactors and vitamins	43023.9	32.1827	0	0	0.0148111	0.0434298	0.947999	1
SC	c971.a1	GRMZM2G146514_P01*	Zm00001d049223	moderately similar to ( 458) AT3G02830 | Symbols: ZFN1 | ZFN1 (ZINC FINGER PROTEIN 1); DNA binding / nuclease/ nucleic acid binding | chr3:614075-615916 FORWARDhighly similar to ( 535) ZFNL_PEA Zinc finger CCCH domain-containing protein ZFN-like - Pisum sativum (Garden pea)highly similar to ( 758) loc_os11g28270 12011.m079994 protein zinc finger CCCH type domain-containing protein ZFN-like, putat…	Transcription	42614.4	426.356	1.47783e-09	4.25268e-09	0.452227	0.560796	0.752899	1
SC	c976.a1	GRMZM2G064360_P01	Zm00001d014840	moderately similar to ( 225) AT3G12500 | Symbols: ATHCHIB, PR3, PR-3, CHI-B, B-CHI | ATHCHIB (ARABIDOPSIS THALIANA BASIC CHITINASE); chitinase | chr3:3962501-3963945 REVERSEmoderately similar to ( 259) CHIA_SECCE Basic endochitinase A precursor (EC 3.2.1.14) (Rye seed chitinase-a) (RSC-a) - Secale cereale (Rye)moderately similar to ( 268) loc_os05g33140 12005.m07546 protein basic endochitinase 1 …	Environmental adaptation	41824.9	572.262	0	0	0	0	0.0505169	0.602643
SC	c549.a2	AC211349.4_FGP001	Zm00001d012787	highly similar to ( 556) AT3G58140 | Symbols: | phenylalanyl-tRNA synthetase class IIc family protein | chr3:21529988-21532386 REVERSEhighly similar to ( 622) loc_os12g34860 12012.m07279 protein ATP binding protein, putative, expressed seq=cds; coord=8:175624692..175630581:1; parent_gene=AC211349.4_FG001	Translation	35855	50.0487	3.94794e-07	9.18638e-07	0.429001	0.542919	0.979712	1
SC	c869.a2	GRMZM2G022275_P01*	Zm00001d046445	highly similar to ( 577) AT1G52730 | Symbols: | transducin family protein / WD-40 repeat family protein | chr1:19642866-19644978 FORWARDhighly similar to ( 632) loc_os06g39760 12006.m08513 protein serine-threonine kinase receptor-associated protein, putative, expressed seq=cds; coord=9:86866692..86874101:-1; parent_gene=GRMZM2G022275	Signal transduction	35136.3	394.137	0.00861346	0.0126455	0.00525862	0.0184735	0.537841	1
SC	c609.a1	GRMZM2G148744_P01*	Zm00001d031611	moderately similar to ( 292) AT1G67430 | Symbols: | 60S ribosomal protein L17 (RPL17B) | chr1:25262209-25263627 FORWARDmoderately similar to ( 345) RL17_MAIZE 60S ribosomal protein L17 - Zea mays (Maize)moderately similar to ( 318) loc_os09g08430 12009.m04110 protein 60S ribosomal protein L17, putative, expressed seq=cds; coord=4:44061937..44064386:-1; parent_gene=GRMZM2G702426	Translation	35030.2	33.4802	0.0599912	0.0773656	0.0167321	0.0480215	0.949329	1
SC	c563.a1	GRMZM2G040164_P01*	NA	moderately similar to ( 320) AT1G56450 | Symbols: PBG1 | PBG1; peptidase/ threonine-type endopeptidase | chr1:21141970-21144186 FORWARDmoderately similar to ( 395) loc_os09g33986 12009.m22255 protein proteasome subunit beta type 4 precursor, putative, expressed seq=cds; coord=7:139359548..139365393:-1; parent_gene=GRMZM2G040164	Folding, sorting and degradation	31128.4	9.73921	2.2321e-05	4.35945e-05	0.180435	0.304098	0.172836	0.971918
SC	d1101.a1	GRMZM2G117786_P01	Zm00001d050383	highly similar to ( 522) AT3G25860 | Symbols: LTA2, PLE2 | LTA2; dihydrolipoyllysine-residue acetyltransferase | chr3:9460632-9462585 FORWARDhighly similar to ( 612) loc_os08g33440 12008.m07334 protein dihydrolipoyllysine-residue acetyltransferase component of pyruvatedehydrogenase complex, putative, expressed seq=cds; coord=4:82008782..82012777:-1; parent_gene=GRMZM2G117786	Carbohydrate metabolism	25414.1	31.2709	0.490591	0.533487	0.000853307	0.00396257	0.584449	1
SC	c895.a1	GRMZM2G420926_P02	Zm00001d048336	moderately similar to ( 465) AT2G42500 | Symbols: PP2A-4 | PP2A-4; hydrolase/ protein serine/threonine phosphatase | chr2:17698099-17701226 REVERSEmoderately similar to ( 471) PP2A4_ORYSA Serine/threonine-protein phosphatase PP2A-4 catalytic subunit (EC 3.1.3.16) - Oryza sativa (Rice)moderately similar to ( 479) loc_os03g07150 12003.m101730 protein OsPP2Ac-5 - Phosphatase 2A isoform 5 belonging t…	Folding, sorting and degradation	16752.8	1716.41	1.81759e-10	5.5712e-10	0.703965	0.781876	0.0202521	0.399883
SC	d1034.a1	GRMZM2G150166_P01	Zm00001d033830	highly similar to ( 570) AT4G34490 | Symbols: ATCAP1, CAP 1, CAP1 | ATCAP1 (ARABIDOPSIS THALIANA CYCLASE ASSOCIATED PROTEIN 1); actin binding | chr4:16484896-16487355 REVERSEhighly similar to ( 712) loc_os03g51250 12003.m10106 protein adenylyl cyclase-associated protein 1, putative, expressed seq=cds; coord=1:270350318..270355747:1; parent_gene=GRMZM2G150166	Replication and repair	15742.7	405.486	1.02895e-12	3.83907e-12	2.82151e-09	3.39208e-08	0.176823	0.981138
SC	c667.a2	GRMZM2G064163_P01	Zm00001d005159	highly similar to ( 511) AT1G23820 | Symbols: SPDS1 | SPDS1 (spermidine synthase 1); spermidine synthase | chr1:8420278-8422724 FORWARDhighly similar to ( 592) SPD1_ORYSA Spermidine synthase 1 (EC 2.5.1.16) (Putrescine aminopropyltransferase 1) (SPDSY 1) - Oryza sativa (Rice)highly similar to ( 592) loc_os07g22600 12007.m29134 protein spermidine synthase 1, putative, expressed seq=cds; coord=2:15…	AminoAcid metabolism	14557.8	648.16	2.38126e-08	6.19356e-08	0.00505415	0.0178712	0.571915	1
SC	c457.a3	GRMZM2G013214_P01	NA	weakly similar to ( 122) AT1G74920 | Symbols: ALDH10A8 | ALDH10A8; 3-chloroallyl aldehyde dehydrogenase/ oxidoreductase | chr1:28139175-28142573 REVERSEweakly similar to ( 108) BADH_ORYSA Betaine-aldehyde dehydrogenase (EC 1.2.1.8) (BADH) - Oryza sativa (Rice)weakly similar to ( 135) loc_os08g32870 12008.m07279 protein betaine-aldehyde dehydrogenase, putative, expressed seq=cds; coord=4:79443577.…	Biosynthesis of other secondary metabolites	14359.5	92.6065	0	0	0.911208	0.94077	0.627969	1
SC	c553.a1	GRMZM2G171444_P01	Zm00001d017449	weakly similar to ( 174) AT4G17560 | Symbols: | ribosomal protein L19 family protein | chr4:9780343-9781752 FORWARDweakly similar to ( 168) RK19_SPIOL 50S ribosomal protein L19, chloroplast precursor (CL19) - Spinacia oleracea (Spinach)moderately similar to ( 282) loc_os02g43600 12002.m09395 protein 50S ribosomal protein L19, putative, expressed seq=cds; coord=5:190751995..190754841:-1; parent_ge…	Translation	13803.1	5.9059	0.00643187	0.00952022	0.130191	0.232504	0.0572629	0.607436
SC	c367.a2	GRMZM2G060630_P01	Zm00001d052155	highly similar to ( 517) AT5G14040 | Symbols: | mitochondrial phosphate transporter | chr5:4531059-4532965 REVERSEhighly similar to ( 585) loc_os02g52860 12002.m10316 protein phosphate carrier protein, mitochondrial precursor, putative, expressed seq=cds; coord=4:178490153..178494800:1; parent_gene=GRMZM2G060630	Membrane transport	12746.3	17.6715	1.02975e-06	2.3068e-06	0.0706358	0.144997	0.436871	1
SC	c779.a1	GRMZM2G141799_P01	Zm00001d028575	moderately similar to ( 320) AT5G06060 | Symbols: | tropinone reductase, putative / tropine dehydrogenase, putative | chr5:1824066-1825833 REVERSEvery weakly similar to (96.7) GRDH_ORYSA Glucose and ribitol dehydrogenase homolog (EC 1.1.1.-) - Oryza sativa (Rice)moderately similar to ( 390) loc_os03g16220 12003.m101290 protein tropinone reductase, putative, expressed seq=cds; coord=1:39213217..39…	misc	12471.1	44.5871	0	0	0.0203173	0.055654	0.273482	1
SC	c667.a1	GRMZM2G051771_P01*	Zm00001d019467	highly similar to ( 508) AT1G23820 | Symbols: SPDS1 | SPDS1 (spermidine synthase 1); spermidine synthase | chr1:8420278-8422724 FORWARDhighly similar to ( 570) SPD1_ORYSA Spermidine synthase 1 (EC 2.5.1.16) (Putrescine aminopropyltransferase 1) (SPDSY 1) - Oryza sativa (Rice)highly similar to ( 570) loc_os07g22600 12007.m29134 protein spermidine synthase 1, putative, expressed seq=cds; coord=7:33…	AminoAcid metabolism	12349.8	76.6202	0.010103	0.0146338	0.00124456	0.00556454	0.0529514	0.607436
SC	c335.a2	GRMZM2G036048_P01	NA	weakly similar to ( 116) ZRP4_MAIZE O-methyltransferase ZRP4 (EC 2.1.1.-) (OMT) - Zea mays (Maize)moderately similar to ( 273) loc_os11g20090 12011.m06084 protein O-methyltransferase ZRP4, putative, expressed seq=cds; coord=2:126763603..126764554:1; parent_gene=GRMZM2G036048	Biosynthesis of other secondary metabolites	11943.8	21.4988	2.91456e-11	9.60031e-11	8.87683e-08	8.54765e-07	0.036416	0.518449
SC	c868.a1	GRMZM2G180612_P06	Zm00001d003839	moderately similar to ( 462) AT5G47860 | Symbols: | unknown protein | chr5:19381656-19384310 FORWARDhighly similar to ( 578) loc_os04g33280 12004.m101523 protein expressed protein seq=cds; coord=2:59627549..59632694:1; parent_gene=GRMZM2G180612	notassigned	9676.39	693.821	0.0182143	0.0252665	3.54538e-06	2.62746e-05	0.336944	1
SC	d1226.a1	GRMZM2G423137_P01	Zm00001d053925	moderately similar to ( 214) AT3G61870 | Symbols: | unknown protein | chr3:22902702-22903895 FORWARDmoderately similar to ( 241) loc_os02g03010 12002.m05651 protein expressed protein seq=cds; coord=4:238355940..238357484:-1; parent_gene=GRMZM2G423137	Energy metabolism	7805.17	56.7249	6.49669e-10	1.92587e-09	1.24567e-05	8.75203e-05	0.605537	1
SC	c935.a1	GRMZM2G101446_P01*	Zm00001d049230	weakly similar to ( 197) AT5G42190 | Symbols: ASK2, SKP1B | ASK2 (ARABIDOPSIS SKP1-LIKE 2); protein binding / ubiquitin-protein ligase | chr5:16854495-16855516 REVERSEmoderately similar to ( 228) loc_os11g26910 12011.m06610 protein SKP1-like protein 1A, putative, expressed seq=cds; coord=4:20544002..20550099:-1; parent_gene=GRMZM2G101446	Folding, sorting and degradation	7190.02	103.241	1.19694e-10	3.71086e-10	0.827637	0.884011	0.673303	1
SC	c415.a3	GRMZM2G081883_P01	Zm00001d042600	moderately similar to ( 216) AT4G10040 | Symbols: CYTC-2 | CYTC-2 (cytochrome c-2); electron carrier/ heme binding / iron ion binding | chr4:6277083-6278281 FORWARDmoderately similar to ( 226) CYC_ORYSA Cytochrome c - Oryza sativa (Rice)moderately similar to ( 228) loc_os05g34770 12005.m27830 protein cytochrome c, putative, expressed seq=cds; coord=3:170498643..170503371:1; parent_gene=GRMZM2G081…	Energy metabolism	6984.81	31.051	6.34967e-05	0.00011907	0.0187576	0.0520403	0.743967	1
SC	c474.a2	AC149828.2_FGP002	Zm00001d048271	moderately similar to ( 357) AT5G35590 | Symbols: PAA1 | PAA1 (PROTEASOME ALPHA SUBUNIT A 1); endopeptidase/ peptidase/ threonine-type endopeptidase | chr5:13765417-13767768 REVERSEmoderately similar to ( 397) PSA6_ORYSA Proteasome subunit alpha type 6 (EC 3.4.25.1) (20S proteasome alpha subunit A) (20S proteasome subunit alpha-1) - Oryza sativa (Rice)moderately similar to ( 397) loc_os03g08280 1…	Folding, sorting and degradation	5751.04	54.4913	2.22045e-16	1.07255e-15	0.815606	0.874387	0.715419	1
SC	c526.a2	GRMZM2G073150_P01	Zm00001d037111	moderately similar to ( 209) AT5G04800 | Symbols: | 40S ribosomal protein S17 (RPS17D) | chr5:1389217-1389642 FORWARDmoderately similar to ( 263) loc_os10g27190 12010.m05653 protein 40S ribosomal protein S17-4, putative, expressed seq=cds; coord=6:108069110..108070157:1; parent_gene=GRMZM2G073150	Translation	5329.77	41.3024	0.0343807	0.0458692	0.00492698	0.0174786	0.0346021	0.505939
SC	c170.a2	GRMZM2G471456_P01	NA	NA	NA	4960.25	1369.91	0.408362	0.450865	0.221563	0.344441	0.981998	1
SC	c450.a1	GRMZM2G145854_P01	Zm00001d013424	nearly identical (1129) AT5G37510 | Symbols: EMB1467 | EMB1467 (embryo defective 1467); NADH dehydrogenase (ubiquinone)/ NADH dehydrogenase/ electron carrier/ iron-sulfur cluster binding / oxidoreductase/ oxidoreductase, acting on NADH or NADPH | chr5:14897490-14900447 FORWARDnearly identical (1159) NDUS1_SOLTU NADH-ubiquinone oxidoreductase 75 kDa subunit, mitochondrial precursor (EC 1.6.5.3) (E…	Energy metabolism	4550.13	10.9215	0	0	0.202034	0.325299	0.844585	1
SC	c419.a1	GRMZM2G092296_P01	Zm00001d045448	weakly similar to ( 191) AT5G62300 | Symbols: | 40S ribosomal protein S20 (RPS20C) | chr5:25021388-25022235 REVERSEmoderately similar to ( 223) RS20_ORYSA 40S ribosomal protein S20 - Oryza sativa (Rice)moderately similar to ( 223) loc_os06g04290 12006.m05158 protein 40S ribosomal protein S20, putative, expressed seq=cds; coord=9:22655251..22657461:1; parent_gene=GRMZM2G092296	Translation	4531.91	5.91889	1.04839e-09	3.05757e-09	0.848796	0.898627	0.914099	1
SC	c719.a1	GRMZM2G306374_P01	Zm00001d002334	highly similar to ( 862) AT2G35040 | Symbols: | AICARFT/IMPCHase bienzyme family protein | chr2:14765347-14768269 REVERSEhighly similar to ( 951) loc_os08g10570 12008.m26473 protein bifunctional purine biosynthesis protein purH, putative, expressed seq=cds; coord=2:10385055..10389112:1; parent_gene=GRMZM2G306374	Nucleotide metabolism	4430.66	5264.61	0.00888016	0.0129667	2.69026e-05	0.000176416	0.77515	1
SC	c837.a1	GRMZM2G028313_P01*	Zm00001d004172	highly similar to ( 680) AT1G18070 | Symbols: | EF-1-alpha-related GTP-binding protein, putative | chr1:6214236-6218211 REVERSEmoderately similar to ( 273) EF1A_ORYSA Elongation factor 1-alpha (EF-1-alpha) - Oryza sativa (Rice)highly similar to ( 806) loc_os04g20220 12004.m07179 protein eukaryotic peptide chain release factor GTP-binding subunit, putative, expressed seq=cds; coord=2:86767149..867…	Translation	4359.57	19.2006	3.33067e-16	1.59459e-15	0.31504	0.442693	0.634058	1
SC	c465.a2	GRMZM2G124103_P01*	Zm00001d005253	weakly similar to ( 105) AT3G01390 | Symbols: VMA10, AVMA10 | VMA10 (VACUOLAR MEMBRANE ATPASE 10); hydrogen ion transporting ATP synthase, rotational mechanism | chr3:150265-150922 REVERSEweakly similar to ( 103) VATG1_TOBAC Vacuolar ATP synthase subunit G 1 (EC 3.6.3.14) (V-ATPase G subunit 1) (Vacuolar proton pump G subunit 1) - Nicotiana tabacum (Common tobacco)weakly similar to ( 132) loc_os0…	Membrane transport	3573.59	27884.2	4.64248e-08	1.18192e-07	0.00290779	0.0111174	0.199057	1
SC	c579.a1	GRMZM2G018275_P01	Zm00001d003457	weakly similar to ( 179) AT4G39730 | Symbols: | lipid-associated family protein | chr4:18432950-18433581 FORWARDmoderately similar to ( 278) loc_os04g38390 12004.m08829 protein wound/stress protein, putative, expressed seq=cds; coord=2:43117505..43119018:-1; parent_gene=GRMZM2G018275	notassigned	3508.4	27.6925	0	0	0.000301083	0.00159087	0.337621	1
SC	c950.a1	GRMZM2G318346_P01	Zm00001d013041	weakly similar to ( 156) AT4G32470 | Symbols: | ubiquinol-cytochrome C reductase complex 14 kDa protein, putative | chr4:15669705-15671095 REVERSEweakly similar to ( 169) UCR6_SOLTU Ubiquinol-cytochrome c reductase complex 14 kDa protein (EC 1.10.2.2) (CR14) - Solanum tuberosum (Potato)weakly similar to ( 177) loc_os03g59220 12003.m10822 protein ubiquinol-cytochrome c reductase complex 14 kDa pro…	Energy metabolism	3066.43	722.219	6.47042e-05	0.000121124	1.07814e-05	7.80871e-05	0.00417257	0.181502
SC	c355.a2	GRMZM2G129804_P02	Zm00001d023340	weakly similar to ( 159) AT3G08740 | Symbols: | elongation factor P (EF-P) family protein | chr3:2654788-2656154 REVERSEmoderately similar to ( 201) loc_os12g02380 12012.m04239 protein elongation factor P, putative, expressed seq=cds; coord=10:4071334..4072941:-1; parent_gene=GRMZM2G129804	Translation	2275.55	51.1971	1.33782e-13	5.3414e-13	0.305689	0.435204	0.914172	1
SC	c699.a2	GRMZM2G158039_P01	Zm00001d017490	weakly similar to ( 146) AT5G65220 | Symbols: | ribosomal protein L29 family protein | chr5:26061301-26062506 FORWARDmoderately similar to ( 209) RK29_MAIZE 50S ribosomal protein L29, chloroplast precursor (CL29) - Zea mays (Maize)weakly similar to ( 183) loc_os02g51790 12002.m10210 protein 50S ribosomal protein L29, chloroplast precursor, putative, expressed seq=cds; coord=5:192003005..192008209…	Translation	1957.29	28.1233	1.15537e-07	2.86723e-07	0.386966	0.508745	0.141876	0.905386
SC	c563.a2	GRMZM2G023080_P01	Zm00001d006125	moderately similar to ( 322) AT1G56450 | Symbols: PBG1 | PBG1; peptidase/ threonine-type endopeptidase | chr1:21141970-21144186 FORWARDmoderately similar to ( 395) loc_os09g33986 12009.m22255 protein proteasome subunit beta type 4 precursor, putative, expressed seq=cds; coord=2:193416339..193419729:-1; parent_gene=GRMZM2G023080	Folding, sorting and degradation	1860.4	8.82554	4.69416e-06	9.80517e-06	0.0180022	0.0507249	0.1277	0.872166
SC	c686.a2	GRMZM2G143480_P02	Zm00001d026476	moderately similar to ( 204) AT2G44050 | Symbols: COS1 | COS1 (COI1 SUPPRESSOR1); 6,7-dimethyl-8-ribityllumazine synthase | chr2:18224304-18225917 FORWARDweakly similar to ( 181) RISB_SPIOL 6,7-dimethyl-8-ribityllumazine synthase, chloroplast precursor (EC 2.5.1.9) (DMRL synthase) (Lumazine synthase) - Spinacia oleracea (Spinach)moderately similar to ( 258) loc_os04g42000 12004.m09174 protein 6,7…	Metabolism of cofactors and vitamins	1792.04	7.70998	3.65668e-06	7.71254e-06	0.00160828	0.00686022	0.698667	1
SC	c603.a1	GRMZM2G071333_P01	Zm00001d001935	nearly identical (1456) AT1G09620 | Symbols: | ATP binding / aminoacyl-tRNA ligase/ leucine-tRNA ligase/ nucleotide binding | chr1:3113077-3116455 REVERSEnearly identical (1784) loc_os09g32650 12009.m06352 protein leucyl-tRNA synthetase, cytoplasmic, putative, expressed seq=cds; coord=2:3098932..3104990:1; parent_gene=GRMZM2G071333	Translation	1713.45	10.8205	0.000112588	0.00020543	0.0960645	0.184294	0.0317108	0.476542
SC	c344.a2	GRMZM2G166281_P01	Zm00001d002065	highly similar to ( 626) AT1G47128 | Symbols: RD21, RD21A | RD21 (responsive to dehydration 21); cysteine-type endopeptidase/ cysteine-type peptidase | chr1:17283139-17285609 REVERSEhighly similar to ( 761) ORYA_ORYSA Oryzain alpha chain precursor (EC 3.4.22.-) - Oryza sativa (Rice)highly similar to ( 550) loc_os04g57440 12004.m101443 protein cysteine protease 1 precursor, putative, expressed seq…	Folding, sorting and degradation	1682.04	66.1381	0.041215	0.0541198	4.25921e-10	5.42172e-09	0.249526	1
SC	c617.a1	GRMZM2G077208_P02	Zm00001d014679	very weakly similar to (91.7) AT4G25890 | Symbols: | 60S acidic ribosomal protein P3 (RPP3A) | chr4:13159627-13160393 REVERSEweakly similar to ( 116) RLA3_MAIZE 60S acidic ribosomal protein P3 (P1/P2-like) (P3A) - Zea mays (Maize)very weakly similar to ( 100) loc_os06g48780 12006.m09404 protein 60S acidic ribosomal protein P3, putative, expressed seq=cds; coord=5:56842476..56843934:-1; parent_gen…	Translation	1441.24	29.1862	2.18198e-10	6.65043e-10	0.405019	0.522325	0.416002	1
SC	c493.a4	GRMZM2G152908_P01	Zm00001d047253	nearly identical (1233) AT3G43190 | Symbols: SUS4, ATSUS4 | SUS4; UDP-glycosyltransferase/ sucrose synthase/ transferase, transferring glycosyl groups | chr3:15179204-15182577 REVERSEnearly identical (1661) SUS2_MAIZE Sucrose synthase 2 (EC 2.4.1.13) (Sucrose-UDP glucosyltransferase 2) - Zea mays (Maize)nearly identical (1587) loc_os03g28330 12003.m34880 protein sucrose synthase 2, putative, expr…	Carbohydrate metabolism	1424.3	6416.46	3.88884e-09	1.08168e-08	0.342607	0.467466	0.342982	1
SC	c604.a1	GRMZM2G055936_P01	Zm00001d011581	moderately similar to ( 263) AT1G65980 | Symbols: TPX1 | TPX1 (thioredoxin-dependent peroxidase 1); antioxidant/ oxidoreductase | chr1:24559595-24560753 REVERSEmoderately similar to ( 292) loc_os01g48420 12001.m11033 protein peroxiredoxin-5, mitochondrial precursor, putative, expressed seq=cds; coord=8:150358554..150362799:-1; parent_gene=GRMZM2G055936	Folding, sorting and degradation	1363.23	9.04602	0	0	0.0384402	0.0888725	0.69984	1
SC	c823.a1	GRMZM2G143469_P01	Zm00001d011256	weakly similar to ( 135) AT1G34000 | Symbols: OHP2 | OHP2 (ONE-HELIX PROTEIN 2) | chr1:12358151-12358902 REVERSEweakly similar to ( 188) loc_os01g40710 12001.m10341 protein OHP2, putative, expressed seq=cds; coord=8:140467509..140468800:1; parent_gene=GRMZM2G143469	Energy metabolism	1170.85	28.7697	0.480069	0.524152	0.588805	0.690235	0.52962	1
SC	c459.a2	GRMZM2G014444_P01*	Zm00001d016200	moderately similar to ( 293) AT5G45775 | Symbols: | 60S ribosomal protein L11 (RPL11D) | chr5:18565281-18566496 REVERSEmoderately similar to ( 300) RL11_ORYSA 60S ribosomal protein L11 - Oryza sativa (Rice)moderately similar to ( 303) loc_os02g14059 12002.m77785 protein 60S ribosomal protein L11-1, putative, expressed seq=cds; coord=5:146886978..146888542:-1; parent_gene=GRMZM2G014444	Translation	976.004	24.8047	0.000540949	0.000903252	0.0554754	0.119333	0.588108	1
SC	c416.a2	GRMZM2G153569_P01*	Zm00001d010431	moderately similar to ( 244) AT1G30230 | Symbols: | elongation factor 1-beta / EF-1-beta | chr1:10639286-10640601 FORWARDmoderately similar to ( 281) EF1D1_ORYSA Elongation factor 1-delta 1 (EF-1-delta 1) (Elongation factor 1B-beta 1) (eEF-1B beta 1) - Oryza sativa (Rice)moderately similar to ( 283) loc_os07g42300 12007.m08465 protein elongation factor 1-delta 1, putative, expressed seq=cds; coor…	Translation	963.235	13.5045	0	0	0.406058	0.523041	0.932269	1
SC	c368.a3	GRMZM2G119499_P02	Zm00001d027539	moderately similar to ( 262) loc_os03g04220 12003.m05953 protein glutathione S-transferase, C-terminal domain containing protein, expressed seq=cds; coord=1:7824574..7825878:-1; parent_gene=GRMZM2G119499	misc	939.726	7.24453	0.000562983	0.000938594	0.655578	0.749826	0.996872	1
SC	c694.a1	GRMZM2G378121_P01	Zm00001d006756	very weakly similar to (90.1) loc_os07g40320 12007.m08274 protein got1-like family protein, expressed seq=cds; coord=2:209131619..209132616:1; parent_gene=GRMZM2G378121	notassigned	795.607	16.3562	8.13447e-05	0.000150922	0.00197659	0.00810101	0.67275	1
SC	c724.a2	GRMZM2G154509_P01*	Zm00001d024965	moderately similar to ( 398) AT5G64460 | Symbols: | FUNCTIONS IN: molecular_function unknown; INVOLVED IN: biological_process unknown; LOCATED IN: cellular_component unknown; EXPRESSED IN: 22 plant structures; EXPRESSED DURING: 13 growth stages; CONTAINS InterPro DOMAIN/s: Phosphoglycerate mutase (InterPro:IPR013078); BEST Arabidopsis thaliana protein match is: unknown protein (TAIR:AT1G58280.3);…	Carbohydrate metabolism	772.217	32.9962	0.185065	0.221016	0.141744	0.25019	0.301074	1
SC	c685.a1	GRMZM2G152775_P04	Zm00001d036108	moderately similar to ( 380) AT4G31300 | Symbols: PBA1 | PBA1; endopeptidase/ peptidase/ threonine-type endopeptidase | chr4:15188927-15190935 FORWARDmoderately similar to ( 370) PSB6_TOBAC Proteasome subunit beta type 6 precursor (EC 3.4.25.1) (Proteasome delta chain) (Tobacco cryptogein-induced protein 7) (tcI 7) - Nicotiana tabacum (Common tobacco)moderately similar to ( 454) loc_os06g04800 12…	Folding, sorting and degradation	730.295	13.3895	9.59205e-06	1.94356e-05	0.122688	0.221987	0.902868	1
SC	c765.a1	GRMZM2G000219_P01	Zm00001d047207	weakly similar to ( 112) AT4G33520 | Symbols: PAA1, HMA6 | PAA1 (P-TYPE ATP-ASE 1); ATPase, coupled to transmembrane movement of ions, phosphorylative mechanism / copper ion transmembrane transporter | chr4:16118993-16125849 FORWARDweakly similar to ( 138) loc_os03g27040 12003.m08035 protein copper-transporting ATPase PAA1, putative, expressed seq=cds; coord=9:120249240..120251017:1; parent_gene=…	Membrane transport	682.831	10.2187	0.0133714	0.0190618	0.0019163	0.00791387	0.655867	1
SC	c546.a1	GRMZM2G023194_P01*	Zm00001d025286	moderately similar to ( 370) AT5G13430 | Symbols: | ubiquinol-cytochrome C reductase iron-sulfur subunit, mitochondrial, putative / Rieske iron-sulfur protein, putative | chr5:4305414-4307399 REVERSEmoderately similar to ( 490) UCRI_MAIZE Ubiquinol-cytochrome c reductase iron-sulfur subunit, mitochondrial precursor (EC 1.10.2.2) (Rieske iron-sulfur protein) (RISP) - Zea mays (Maize)moderately sim…	Energy metabolism	619.116	15.7281	0.735074	0.765496	0.207299	0.332293	0.627811	1
SC	c209.a2	GRMZM2G305046_P01*	Zm00001d047787	weakly similar to ( 160) AT5G02560 | Symbols: HTA12 | HTA12; DNA binding | chr5:575437-576456 FORWARDweakly similar to ( 181) H2A_MAIZE Histone H2A - Zea mays (Maize)weakly similar to ( 176) loc_os03g17100 12003.m07141 protein histone H2A, putative, expressed seq=cds; coord=9:139187765..139188857:1; parent_gene=GRMZM2G305046	Replication and repair	608.34	7.18726	3.84428e-05	7.33599e-05	0.377123	0.499446	0.763136	1
SC	c724.a1	GRMZM2G160184_P04	Zm00001d004552	moderately similar to ( 400) AT5G64460 | Symbols: | FUNCTIONS IN: molecular_function unknown; INVOLVED IN: biological_process unknown; LOCATED IN: cellular_component unknown; EXPRESSED IN: 22 plant structures; EXPRESSED DURING: 13 growth stages; CONTAINS InterPro DOMAIN/s: Phosphoglycerate mutase (InterPro:IPR013078); BEST Arabidopsis thaliana protein match is: unknown protein (TAIR:AT1G58280.3);…	Carbohydrate metabolism	506.033	40.1555	0.880209	0.896786	0.217512	0.341986	0.224632	1
SC	c390.a2	GRMZM2G389118_P01	Zm00001d010852	highly similar to ( 860) AT4G02510 | Symbols: TOC159, TOC86, PPI2, TOC160, ATTOC159 | TOC159 (TRANSLOCON AT THE OUTER ENVELOPE MEMBRANE OF CHLOROPLASTS 159); transmembrane receptor | chr4:1104766-1109360 FORWARDweakly similar to ( 101) TOC34_PEA Translocase of chloroplast 34 (EC 3.6.5.-) (34 kDa chloroplast outer envelope protein) (GTP-binding protein OEP34) (GTP-binding protein IAP34) - Pisum sa…	Folding, sorting and degradation	467.518	605.997	0.00280964	0.00435535	0.0331606	0.0792048	0.147454	0.918659
SC	c651.a1	GRMZM2G137329_P01	Zm00001d027332	very weakly similar to (85.1) AT1G66850 | Symbols: | protease inhibitor/seed storage/lipid transfer protein (LTP) family protein | chr1:24936985-24937293 FORWARDweakly similar to ( 113) NLTPX_ORYSA Nonspecific lipid-transfer protein 2 precursor (nsLTP2) (7 kDa lipid transfer protein) - Oryza sativa (Rice)weakly similar to ( 113) loc_os03g02050 12003.m05748 protein nonspecific lipid-transfer prote…	misc	412.276	10.3091	0	0	0.0244413	0.0640328	0.715522	1
SC	c876.a1	GRMZM2G086088_P01*	Zm00001d011500	moderately similar to ( 300) AT4G27960 | Symbols: UBC9 | UBC9 (UBIQUITIN CONJUGATING ENZYME 9); ubiquitin-protein ligase | chr4:13916065-13917293 REVERSEweakly similar to ( 145) UBC2_WHEAT Ubiquitin-conjugating enzyme E2-17 kDa (EC 6.3.2.19) (Ubiquitin-protein ligase) (Ubiquitin carrier protein) - Triticum aestivum (Wheat)moderately similar to ( 308) loc_os01g46926 12001.m97531 protein ubiquitin-…	Folding, sorting and degradation	398.182	124.383	0	0	0.330996	0.45827	0.964898	1
SC	b67.a2	GRMZM2G144002_P01	Zm00001d019266	highly similar to ( 640) AT1G27680 | Symbols: APL2 | APL2 (ADPGLC-PPASE LARGE SUBUNIT); glucose-1-phosphate adenylyltransferase | chr1:9631630-9634450 FORWARDhighly similar to ( 617) GLGL1_BETVU Glucose-1-phosphate adenylyltransferase large subunit, chloroplast precursor (EC 2.7.7.27) (ADP-glucose synthase) (ADP-glucose pyrophosphorylase) (AGPase S) (Alpha-D-glucose-1-phosphate adenyl transferase…	Carbohydrate metabolism	376.298	9.53892e+07	0.339013	0.383694	0.000649106	0.00309398	0.262634	1
SC	c569.a1	GRMZM5G859195_P01*	Zm00001d043182	moderately similar to ( 476) AT2G26930 | Symbols: ATCDPMEK, PDE277, ISPE | ATCDPMEK (4-(CYTIDINE 5-PHOSPHO)-2-C-METHYL-D-ERITHRITOL KINASE); 4-(cytidine 5-diphospho)-2-C-methyl-D-erythritol kinase | chr2:11491829-11494229 REVERSEhighly similar to ( 576) loc_os01g58790 12001.m12021 protein 4-diphosphocytidyl-2-C-methyl-D-erythritol kinase, chloroplast precursor, putative, expressed seq=cds; coord=…	Biosynthesis of other secondary metabolites	345.054	43.6525	5.76039e-05	0.000108207	1.85105e-06	1.46193e-05	0.243989	1
SC	c212.a3	GRMZM2G361605_P01*	Zm00001d037717	nearly identical (1147) AT1G79930 | Symbols: HSP91 | HSP91; ATP binding | chr1:30063924-30067067 REVERSEmoderately similar to ( 283) HSP7C_PETHY Heat shock cognate 70 kDa protein - Petunia hybrida (Petunia)nearly identical (1320) loc_os01g08560 12001.m150497 protein heat shock 70 kDa protein 4, putative, expressed seq=cds; coord=6:130963745..130976059:-1; parent_gene=GRMZM2G361605	Folding, sorting and degradation	332.324	22.528	0	0	0.429694	0.543141	0.859193	1
SC	c388.a1	GRMZM2G110192_P01	Zm00001d051556	highly similar to ( 639) AT4G19170 | Symbols: NCED4 | NCED4 (NINE-CIS-EPOXYCAROTENOID DIOXYGENASE 4) | chr4:10481835-10483622 FORWARDhighly similar to ( 892) loc_os02g47510 12002.m09785 protein carotenoid cleavage dioxygenase 1, putative, expressed seq=cds; coord=4:159724032..159726475:-1; parent_gene=GRMZM2G110192	Chemical structure transformation maps	314.28	15.7552	6.81895e-08	1.70789e-07	1.30658e-06	1.06294e-05	0.685652	1
SC	c599.a1	GRMZM2G031169_P01	Zm00001d031799	moderately similar to ( 331) AT2G34460 | Symbols: | flavin reductase-related | chr2:14529635-14530732 FORWARDmoderately similar to ( 414) loc_os06g25439 12006.m07190 protein 3-beta hydroxysteroid dehydrogenase/isomerase, putative, expressed seq=cds; coord=1:199734955..199737964:-1; parent_gene=GRMZM2G031169	notassigned	300.064	13.5962	5.52799e-08	1.3975e-07	7.42339e-05	0.000438913	0.203685	1
SC	c819.a1	GRMZM2G081653_P01*	Zm00001d011178	moderately similar to ( 322) AT2G43945 | Symbols: | unknown protein | chr2:18197995-18199988 REVERSEmoderately similar to ( 380) loc_os01g23680 12001.m43000 protein cysteine sulfinate desulfinase/cysteine desulfurase and related enzymes, putative, expressed seq=cds; coord=8:137972705..137978997:1; parent_gene=GRMZM2G081653	notassigned	269.609	50.6522	1.14356e-09	3.31724e-09	0.000132792	0.000756218	0.829464	1
SC	c686.a1	GRMZM2G033219_P01*	Zm00001d002034	moderately similar to ( 211) AT2G44050 | Symbols: COS1 | COS1 (COI1 SUPPRESSOR1); 6,7-dimethyl-8-ribityllumazine synthase | chr2:18224304-18225917 FORWARDweakly similar to ( 187) RISB_SPIOL 6,7-dimethyl-8-ribityllumazine synthase, chloroplast precursor (EC 2.5.1.9) (DMRL synthase) (Lumazine synthase) - Spinacia oleracea (Spinach)moderately similar to ( 263) loc_os04g42000 12004.m09174 protein 6,7…	Metabolism of cofactors and vitamins	269.305	9.20092	1.64412e-08	4.32833e-08	0.000142459	0.000802815	0.679533	1
SC	c478.a1	GRMZM2G300408_P01	Zm00001d045144	very weakly similar to (83.2) loc_os08g42180 12008.m08196 protein hypothetical protein seq=cds; coord=9:14534848..14536203:1; parent_gene=GRMZM2G300408	notassigned	252.499	8.49198	6.44946e-11	2.04643e-10	0.00864209	0.0280803	0.267506	1
SC	c912.a1	GRMZM2G001887_P01*	Zm00001d013999	moderately similar to ( 214) AT1G73230 | Symbols: | nascent polypeptide-associated complex (NAC) domain-containing protein | chr1:27540506-27541364 REVERSEmoderately similar to ( 235) loc_os10g34180 12010.m21923 protein transcription factor BTF3, putative, expressed seq=cds; coord=1:230179502..230183279:1; parent_gene=GRMZM2G131577	Transcription	247.074	38.4133	1.06648e-12	3.95182e-12	0.182938	0.305934	0.414314	1
SC	c269.a2	GRMZM5G852911_P01	Zm00001d030574	weakly similar to ( 127) AT5G20290 | Symbols: | 40S ribosomal protein S8 (RPS8A) | chr5:6851695-6853012 REVERSEweakly similar to ( 140) RS8_MAIZE 40S ribosomal protein S8 - Zea mays (Maize)weakly similar to ( 139) loc_os04g28180 12004.m07935 protein 40S ribosomal protein S8, putative, expressed seq=cds; coord=1:142655614..142662230:-1; parent_gene=GRMZM5G852911	Translation	226.73	4.70548	7.23643e-13	2.72816e-12	0.402799	0.5214	0.611631	1
SC	c838.a1	GRMZM2G121034_P01	Zm00001d053067	moderately similar to ( 344) AT5G02540 | Symbols: | short-chain dehydrogenase/reductase (SDR) family protein | chr5:568609-570720 FORWARDvery weakly similar to (97.1) POR_DAUCA Protochlorophyllide reductase, chloroplast precursor (EC 1.3.1.33) (PCR) (NADPH-protochlorophyllide oxidoreductase) (POR) - Daucus carota (Carrot)moderately similar to ( 478) loc_os11g07930 12011.m04989 protein retinol deh…	misc	217.991	14.8766	0	0	0.83064	0.886343	0.969137	1
SC	c477.a2	GRMZM2G057441_P01	Zm00001d023222	nearly identical (1612) AT5G06460 | Symbols: ATUBA2, UBA 2 | ATUBA2; ubiquitin activating enzyme/ ubiquitin-protein ligase | chr5:1970239-1974382 FORWARDnearly identical (1833) UBE12_WHEAT Ubiquitin-activating enzyme E1 2 - Triticum aestivum (Wheat)nearly identical (1876) loc_os11g01510 12011.m079908 protein ubiquitin-activating enzyme E1 2, putative, expressed seq=cds; coord=10:1152679..1158648:…	Folding, sorting and degradation	204.845	6.50522	0.361302	0.40427	0.378195	0.500253	0.76746	1
SC	c450.a2	GRMZM2G126038_P01	Zm00001d033753	nearly identical (1131) AT5G37510 | Symbols: EMB1467 | EMB1467 (embryo defective 1467); NADH dehydrogenase (ubiquinone)/ NADH dehydrogenase/ electron carrier/ iron-sulfur cluster binding / oxidoreductase/ oxidoreductase, acting on NADH or NADPH | chr5:14897490-14900447 FORWARDnearly identical (1160) NDUS1_SOLTU NADH-ubiquinone oxidoreductase 75 kDa subunit, mitochondrial precursor (EC 1.6.5.3) (E…	Energy metabolism	190.902	68.1941	0	0	0.0660659	0.137733	0.822874	1
SC	c550.a2	GRMZM2G096585_P01	Zm00001d031569	highly similar to ( 573) AT3G25230 | Symbols: ROF1, ATFKBP62, FKBP62 | ROF1 (ROTAMASE FKBP 1); FK506 binding / calmodulin binding / peptidyl-prolyl cis-trans isomerase | chr3:9188257-9191175 FORWARDhighly similar to ( 618) FKB70_WHEAT 70 kDa peptidyl-prolyl isomerase (EC 5.2.1.8) (Peptidyl-prolyl cis-trans isomerase) (PPIase) (Rotamase) - Triticum aestivum (Wheat)highly similar to ( 632) loc_os08…	Cell growth and death	190.318	13.4555	0	0	0.677951	0.765842	0.897386	1
SC	c231.a2	GRMZM2G415117_P01	Zm00001d047695	highly similar to ( 640) AT4G33680 | Symbols: AGD2 | AGD2 (ABERRANT GROWTH AND DEATH 2); L,L-diaminopimelate aminotransferase/ transaminase | chr4:16171847-16174630 REVERSEhighly similar to ( 723) loc_os03g18810 12003.m35176 protein transaminase/ transferase, transferring nitrogenous groups, putative, expressed seq=cds; coord=9:136805401..136808996:-1; parent_gene=GRMZM2G415117	AminoAcid metabolism	189.767	6.35181	0.0670705	0.0858819	0.0351778	0.0832876	0.764003	1
SC	c389.a2	GRMZM5G839738_P01	NA	NA	NA	184.812	18.9092	4.16324e-06	8.71302e-06	0.0435177	0.0978922	0.0160025	0.359901
SC	b39.a5	GRMZM2G108692_P01	NA	NA	NA	184.067	112.446	0.000895588	0.00146379	0.12318	0.222506	0.801239	1
SC	a5.a4	GRMZM2G047028_P01	Zm00001d043194	moderately similar to ( 376) AT1G56190 | Symbols: | phosphoglycerate kinase, putative | chr1:21028622-21030454 FORWARDmoderately similar to ( 385) PGKH_TOBAC Phosphoglycerate kinase, chloroplast precursor (EC 2.7.2.3) - Nicotiana tabacum (Common tobacco)moderately similar to ( 397) loc_os05g41640 12005.m08338 protein phosphoglycerate kinase, chloroplast precursor, putative, expressed seq=cds; coo…	Energy metabolism	173.32	8.87699	0.00804	0.0118357	0.223931	0.347125	0.783179	1
SC	c544.a1	GRMZM2G027378_P01*	Zm00001d053296	moderately similar to ( 255) AT2G36060 | Symbols: MMZ3, UEV1C | ubiquitin-conjugating enzyme family protein | chr2:15143012-15143998 REVERSEmoderately similar to ( 256) loc_os09g12570 12009.m04519 protein ubiquitin-conjugating enzyme spm2, putative, expressed seq=cds; coord=4:220508652..220512101:1; parent_gene=GRMZM2G027378	Folding, sorting and degradation	168.902	10.0219	0.855707	0.876775	0.0145401	0.0427512	0.400913	1
SC	c923.a1	GRMZM2G029566_P01	Zm00001d053663	highly similar to ( 609) AT1G12050 | Symbols: | fumarylacetoacetase, putative | chr1:4072904-4075856 FORWARDhighly similar to ( 752) loc_os02g10310 12002.m100035 protein fumarylacetoacetase, putative, expressed seq=cds; coord=4:233220256..233225418:1; parent_gene=GRMZM2G029566	AminoAcid metabolism	153.365	27.9359	2.98378e-06	6.30556e-06	0.0111407	0.034023	0.40446	1
SC	c424.a1	GRMZM5G848768_P02	Zm00001d018487	highly similar to ( 589) AT2G33150 | Symbols: PKT3, PED1, KAT2 | PKT3 (PEROXISOMAL 3-KETOACYL-COA THIOLASE 3); acetyl-CoA C-acyltransferase | chr2:14047814-14050983 REVERSEhighly similar to ( 651) loc_os02g57260 12002.m10748 protein 3-ketoacyl-CoA thiolase 2, peroxisomal precursor, putative, expressed seq=cds; coord=5:215817786..215821620:-1; parent_gene=GRMZM5G848768	Lipid metabolism	140.632	7.12944	0.00371104	0.00567941	0.0123006	0.03697	0.765393	1
SC	c546.a2	AC214350.3_FGP007	Zm00001d016619	moderately similar to ( 365) AT5G13430 | Symbols: | ubiquinol-cytochrome C reductase iron-sulfur subunit, mitochondrial, putative / Rieske iron-sulfur protein, putative | chr5:4305414-4307399 REVERSEmoderately similar to ( 416) UCRI_MAIZE Ubiquinol-cytochrome c reductase iron-sulfur subunit, mitochondrial precursor (EC 1.10.2.2) (Rieske iron-sulfur protein) (RISP) - Zea mays (Maize)moderately sim…	Energy metabolism	136.7	16.6491	0.11566	0.142696	0.288296	0.417585	0.981739	1
SC	c871.a1	GRMZM2G382106_P01	Zm00001d022199	moderately similar to ( 318) AT1G77930 | Symbols: | DNAJ heat shock N-terminal domain-containing protein | chr1:29301184-29302467 FORWARDmoderately similar to ( 399) loc_os07g43330 12007.m08561 protein heat shock protein binding protein, putative, expressed seq=cds; coord=7:167090266..167100862:1; parent_gene=GRMZM2G382106	Folding, sorting and degradation	134.341	42.6825	0.488523	0.531772	0.145325	0.253207	0.0691836	0.653899
SC	c341.a3	GRMZM2G467943_P01	Zm00001d019959	weakly similar to ( 113) AT2G23350 | Symbols: PAB4, PABP4 | PAB4 (POLY(A) BINDING PROTEIN 4); RNA binding / translation initiation factor | chr2:9943209-9946041 FORWARDvery weakly similar to (94.4) BIP3_MAIZE Luminal-binding protein 3 precursor (BiP3) - Zea mays (Maize)weakly similar to ( 124) loc_os09g02700 12009.m03642 protein polyadenylate-binding protein 2, putative, expressed seq=cds; coord=…	Transcription	126.25	13.6169	0.404871	0.447467	0.676734	0.765842	0.379843	1
SC	c264.a2	GRMZM2G054559_P01	Zm00001d039670	nearly identical (1322) AT3G15730 | Symbols: PLDALPHA1, PLD | PLDALPHA1 (PHOSPHOLIPASE D ALPHA 1); phospholipase D | chr3:5330835-5333474 FORWARDnearly identical (1637) PLDA1_MAIZE Phospholipase D alpha 1 (EC 3.1.4.4) (PLD alpha 1) (Choline phosphatase 1) (Phosphatidylcholine-hydrolyzing phospholipase D 1) - Zea mays (Maize)nearly identical (1530) loc_os01g07760 12001.m42610 protein phospholipase…	Lipid metabolism	124.9	11.4608	0	0	0.000145618	0.000816366	0.493981	1
SC	c305.a2	GRMZM2G048121_P02	Zm00001d000060	moderately similar to ( 226) AT1G59950 | Symbols: | aldo/keto reductase, putative | chr1:22068033-22070588 REVERSEmoderately similar to ( 253) NADO1_ORYSA Probable NAD(P)H-dependent oxidoreductase 1 (EC 1.1.1.-) - Oryza sativa (Rice)moderately similar to ( 315) loc_os10g02480 12010.m03667 protein NAD(P)H-dependent oxidoreductase, putative, expressed seq=cds; coord=1:113341846..113343398:-1; paren…	Carbohydrate metabolism	113.159	29.6769	0	0	0	0	0.354305	1
SC	c258.a2	GRMZM2G060090_P01	Zm00001d045229	moderately similar to ( 248) AT5G45890 | Symbols: SAG12 | SAG12 (SENESCENCE-ASSOCIATED GENE 12); cysteine-type peptidase | chr5:18613300-18614759 FORWARDmoderately similar to ( 254) ORYA_ORYSA Oryzain alpha chain precursor (EC 3.4.22.-) - Oryza sativa (Rice)moderately similar to ( 276) loc_os09g38920 12009.m06832 protein thiol protease SEN102 precursor, putative, expressed seq=cds; coord=9:168134…	Folding, sorting and degradation	105.2	4.94923	0	0	6.88338e-15	1.69269e-13	0.00454853	0.182278
SC	c318.a2	GRMZM5G892522_P01	Zm00001d026608	weakly similar to ( 140) AT1G50320 | Symbols: ATHX, ATX | ATHX; enzyme activator | chr1:18638606-18639464 REVERSEvery weakly similar to (92.4) TRXM_SPIOL Thioredoxin M-type, chloroplast precursor (TRX-M) [Contains: Thioredoxin M-type Mc; Thioredoxin M-type Md] - Spinacia oleracea (Spinach)moderately similar to ( 209) loc_os04g57930 12004.m10677 protein thioredoxin X, chloroplast precursor, putati…	Folding, sorting and degradation	104.566	7.63972	0.0111792	0.016085	0.075843	0.153387	0.216505	1
SC	c463.a1	GRMZM2G164352_P01*	Zm00001d036031	nearly identical (1056) AT3G25800 | Symbols: PDF1, PR 65, PP2AA2 | PP2AA2 (PROTEIN PHOSPHATASE 2A SUBUNIT A2); protein phosphatase type 2A regulator | chr3:9423036-9425783 REVERSEhighly similar to ( 679) 2AAA_PEA Protein phosphatase PP2A regulatory subunit A (PR65) (Fragment) - Pisum sativum (Garden pea)nearly identical (1116) loc_os09g07510 12009.m22048 protein serine/threonine-protein phosphata…	Folding, sorting and degradation	101.581	13.2684	0.0136286	0.0193773	0.21403	0.338074	0.854194	1
SC	c258.a3	GRMZM2G097286_P01	Zm00001d023973	moderately similar to ( 265) AT1G06260 | Symbols: | cysteine proteinase, putative | chr1:1916449-1917585 FORWARDmoderately similar to ( 263) CYSEP_PHAVU Vignain precursor (EC 3.4.22.-) (Bean endopeptidase) (Cysteine proteinase EP-C1) - Phaseolus vulgaris (Kidney bean) (French bean)moderately similar to ( 292) loc_os09g38920 12009.m06832 protein thiol protease SEN102 precursor, putative, expressed…	Folding, sorting and degradation	96.077	6.70259	0	0	0.210096	0.334343	0.747525	1
SC	c923.a2	GRMZM2G093359_P01*	NA	highly similar to ( 641) AT1G12050 | Symbols: | fumarylacetoacetase, putative | chr1:4072904-4075856 FORWARDhighly similar to ( 789) loc_os02g10310 12002.m100035 protein fumarylacetoacetase, putative, expressed seq=cds; coord=5:120784559..120792367:1; parent_gene=GRMZM2G093359	AminoAcid metabolism	93.2247	14.3234	1.32808e-07	3.2511e-07	0.00771839	0.0256175	0.131413	0.883158
SC	d1034.a2	GRMZM2G096596_P01	Zm00001d013389	highly similar to ( 561) AT4G34490 | Symbols: ATCAP1, CAP 1, CAP1 | ATCAP1 (ARABIDOPSIS THALIANA CYCLASE ASSOCIATED PROTEIN 1); actin binding | chr4:16484896-16487355 REVERSEhighly similar to ( 707) loc_os03g51250 12003.m10106 protein adenylyl cyclase-associated protein 1, putative, expressed seq=cds; coord=5:9900674..9908640:1; parent_gene=GRMZM2G096596	Replication and repair	87.4043	111.579	2.90423e-12	1.02358e-11	0.000912333	0.004182	0.46719	1
SC	c447.a2	GRMZM2G024310_P01	Zm00001d053983	moderately similar to ( 263) AT2G21870 | Symbols: | unknown protein | chr2:9320456-9322618 REVERSEmoderately similar to ( 366) loc_os02g03860 12002.m05735 protein mitochondrial ATP synthase precursor, putative, expressed seq=cds; coord=4:239151749..239155703:-1; parent_gene=GRMZM2G024310	Energy metabolism	83.9031	11.3039	1.26516e-07	3.11823e-07	0.00141005	0.0061519	0.845254	1
SC	c460.a1	GRMZM2G144372_P01	Zm00001d039157	highly similar to ( 568) AT1G12840 | Symbols: DET3, ATVHA-C | DET3 (DE-ETIOLATED 3); proton-transporting ATPase, rotational mechanism | chr1:4375584-4378220 FORWARDmoderately similar to ( 482) VATC_HORVU Vacuolar ATP synthase subunit C (EC 3.6.3.14) (V-ATPase C subunit) (Vacuolar proton pump C subunit) - Hordeum vulgare (Barley)highly similar to ( 679) loc_os05g51530 12005.m09215 protein vacuolar…	Membrane transport	80.6517	4.69379	0	0	0.000310675	0.00161874	0.425766	1
SC	c515.a1	GRMZM2G111566_P01	Zm00001d013505	moderately similar to ( 318) AT4G14800 | Symbols: PBD2 | PBD2 (20S PROTEASOME BETA SUBUNIT 2); peptidase/ threonine-type endopeptidase | chr4:8500398-8502058 FORWARDmoderately similar to ( 364) PSB2_ORYSA Proteasome subunit beta type 2 (EC 3.4.25.1) (20S proteasome alpha subunit D) (20S proteasome subunit beta-4) - Oryza sativa (Rice)moderately similar to ( 364) loc_os03g48930 12003.m09894 protei…	Folding, sorting and degradation	70.0993	10.8431	0	0	3.18785e-07	2.87438e-06	0.151129	0.920617
SC	c258.a1	GRMZM2G160447_P01	Zm00001d045221	moderately similar to ( 224) AT1G09850 | Symbols: XBCP3 | XBCP3 (xylem bark cysteine peptidase 3); cysteine-type endopeptidase/ cysteine-type peptidase | chr1:3201848-3203875 FORWARDmoderately similar to ( 238) ORYA_ORYSA Oryzain alpha chain precursor (EC 3.4.22.-) - Oryza sativa (Rice)moderately similar to ( 259) loc_os09g38920 12009.m06832 protein thiol protease SEN102 precursor, putative, expr…	Folding, sorting and degradation	69.8514	5.87481	0	0	7.99361e-14	1.66328e-12	0.0184565	0.388158
SC	c108.a2	GRMZM2G359904_P01	Zm00001d036256	moderately similar to ( 472) AT1G06800 | Symbols: | lipase class 3 family protein | chr1:2090109-2091443 REVERSEweakly similar to ( 101) POLB_MAIZE Putative Pol polyprotein from transposon element Bs1 (ORF 1) - Zea mays (Maize)moderately similar to ( 457) loc_os05g32380 12005.m07471 protein triacylglycerol lipase, putative, expressed seq=cds; coord=6:77144115..77148553:-1; parent_gene=GRMZM2G3599…	Lipid metabolism	68.4492	53.3842	0.15155	0.183625	0.967258	0.982697	0.973309	1
XIC	c737.a1	GRMZM2G371793_P01	Zm00001d037680	weakly similar to ( 112) AT4G29260 | Symbols: | acid phosphatase class B family protein | chr4:14422310-14423409 REVERSEweakly similar to ( 130) VSPA_SOYBN Stem 28 kDa glycoprotein precursor (Vegetative storage protein A) - Glycine max (Soybean)moderately similar to ( 211) loc_os07g27580 12007.m07033 protein stem 28 kDa glycoprotein precursor, putative seq=cds; coord=6:129787844..129789708:1; par…	misc	62.8971	18.255	0	0	0	0	3.32795e-05	0.0101835
SC	c712.a1	GRMZM2G035985_P01*	Zm00001d007075	nearly identical (1073) AT3G63460 | Symbols: | WD-40 repeat family protein | chr3:23431009-23437241 REVERSEnearly identical (1648) loc_os07g46370 12007.m08854 protein EMB2221, putative, expressed seq=cds; coord=2:214832665..214852459:1; parent_gene=GRMZM2G035985	Folding, sorting and degradation	43.4663	38.1484	0.385811	0.427713	0.208606	0.333479	0.993421	1
SC	c463.a2	GRMZM2G122135_P03	Zm00001d045482	nearly identical (1051) AT3G25800 | Symbols: PDF1, PR 65, PP2AA2 | PP2AA2 (PROTEIN PHOSPHATASE 2A SUBUNIT A2); protein phosphatase type 2A regulator | chr3:9423036-9425783 REVERSEhighly similar to ( 675) 2AAA_PEA Protein phosphatase PP2A regulatory subunit A (PR65) (Fragment) - Pisum sativum (Garden pea)nearly identical (1112) loc_os09g07510 12009.m22048 protein serine/threonine-protein phosphata…	Folding, sorting and degradation	43.4403	12.7314	0.00945401	0.0137305	0.343337	0.467873	0.977153	1
SC	c259.a3	GRMZM2G064023_P01*	Zm00001d053685	highly similar to ( 774) AT2G44350 | Symbols: ATCS, CSY4 | ATCS; ATP binding / ATP citrate synthase/ citrate (SI)-synthase | chr2:18316673-18320524 FORWARDhighly similar to ( 754) CISY_DAUCA Citrate synthase, mitochondrial precursor (EC 2.3.3.1) - Daucus carota (Carrot)highly similar to ( 879) loc_os11g33240 12011.m080018 protein citrate synthase 4, mitochondrial precursor, putative, expressed se…	Carbohydrate metabolism	38.47	5.11029	0.328035	0.373614	0.285174	0.413937	0.481949	1
SC	c474.a1	GRMZM2G016511_P01	Zm00001d027896	moderately similar to ( 433) AT2G05840 | Symbols: PAA2 | PAA2 (20S PROTEASOME SUBUNIT PAA2); endopeptidase/ peptidase/ threonine-type endopeptidase | chr2:2234226-2235973 FORWARDmoderately similar to ( 478) PSA6_ORYSA Proteasome subunit alpha type 6 (EC 3.4.25.1) (20S proteasome alpha subunit A) (20S proteasome subunit alpha-1) - Oryza sativa (Rice)moderately similar to ( 478) loc_os03g08280 1200…	Folding, sorting and degradation	36.4923	12.0983	2.22045e-16	1.07255e-15	0.739897	0.811113	0.796549	1
SC	c465.a1	GRMZM2G094928_P01	NA	weakly similar to ( 102) AT3G01390 | Symbols: VMA10, AVMA10 | VMA10 (VACUOLAR MEMBRANE ATPASE 10); hydrogen ion transporting ATP synthase, rotational mechanism | chr3:150265-150922 REVERSEweakly similar to ( 102) VATG1_TOBAC Vacuolar ATP synthase subunit G 1 (EC 3.6.3.14) (V-ATPase G subunit 1) (Vacuolar proton pump G subunit 1) - Nicotiana tabacum (Common tobacco)weakly similar to ( 134) loc_os0…	Membrane transport	34.6705	5.13249	5.05703e-09	1.39584e-08	0.489846	0.598209	0.358765	1
SC	c266.a2	GRMZM2G078985_P01	Zm00001d037929	moderately similar to ( 337) AT3G11940 | Symbols: ATRPS5A, AML1 | ATRPS5A (RIBOSOMAL PROTEIN 5A); structural constituent of ribosome | chr3:3778175-3779354 REVERSEmoderately similar to ( 334) RS5_CICAR 40S ribosomal protein S5 (Fragment) - Cicer arietinum (Chickpea) (Garbanzo)moderately similar to ( 355) loc_os11g29190 12011.m080000 protein 40S ribosomal protein S5, putative, expressed seq=cds; c…	Translation	34.336	3.90294	4.36448e-09	1.21086e-08	0.670003	0.761194	0.388407	1
SC	c330.a1	GRMZM2G402936_P01	Zm00001d039040	moderately similar to ( 261) AT2G34420 | Symbols: LHB1B2, LHCB1.5 | LHB1B2; chlorophyll binding | chr2:14522716-14523513 REVERSEmoderately similar to ( 278) CB29_MAIZE Chlorophyll a-b binding protein M9, chloroplast precursor (LHCII type I CAB-M9) (LHCP) - Zea mays (Maize)moderately similar to ( 276) loc_os09g17740 12009.m05032 protein chlorophyll a-b binding protein 1, chloroplast precursor, put…	Energy metabolism	34.1014	8.50901	0.120943	0.148536	0.0356535	0.0842294	0.0931949	0.7856
SC	b81.a3	GRMZM2G000781_P01	NA	weakly similar to ( 158) ATCG01060 | Symbols: PSAC | Encodes the PsaC subunit of photosystem I. | chrC:117318-117563 REVERSEweakly similar to ( 165) PSAC_WHEAT Photosystem I iron-sulfur center (Photosystem I subunit VII) (9 kDa polypeptide) (PSI-C) (PsaC) - Triticum aestivum (Wheat)weakly similar to ( 167) loc_osp1g00920 11562.m00083 protein photosystem I subunit VII seq=cds; coord=4:90620223..90…	Energy metabolism	33.4387	5.33355	0	0	0.998198	0.999122	0.999847	1
SC	c712.a2	GRMZM2G152963_P01*	Zm00001d022378	nearly identical (1065) AT3G63460 | Symbols: | WD-40 repeat family protein | chr3:23431009-23437241 REVERSEnearly identical (1633) loc_os07g46370 12007.m08854 protein EMB2221, putative, expressed seq=cds; coord=7:170807791..170818840:1; parent_gene=GRMZM2G152963	Folding, sorting and degradation	32.2519	20.1136	1.11022e-16	5.43557e-16	0.224288	0.347181	0.869917	1
XIC	b94.a2	GRMZM5G851266_P01	Zm00001d000001	moderately similar to ( 299) PPO2_IPOBA Polyphenol oxidase II, chloroplast precursor (EC 1.10.3.1) (PPO-II) (Catechol oxidase II) - Ipomoea batatas (Sweet potato) (Batate)moderately similar to ( 273) loc_os04g53300 12004.m10221 protein polyphenol oxidase II, chloroplast precursor, putative, expressed seq=cds; coord=10:59660107..59662383:1; parent_gene=GRMZM5G851266	notassigned	30.7731	60.3974	1.46228e-09	2.2461e-09	0	0	0.020658	0.349083
SC	c197.a5	GRMZM2G107362_P02*	Zm00001d053616	highly similar to ( 697) AT5G19990 | Symbols: RPT6A, ATSUG1 | RPT6A (REGULATORY PARTICLE TRIPLE-A ATPASE 6A); ATPase | chr5:6752144-6754918 FORWARDmoderately similar to ( 333) PRS7_PRUPE 26S protease regulatory subunit 7 (26S proteasome subunit 7) (26S proteasome AAA-ATPase subunit RPT1) (Regulatory particle triple-A ATPase subunit 1) - Prunus persica (Peach)highly similar to ( 723) loc_os02g1105…	Folding, sorting and degradation	30.4573	7.428	0.0662706	0.0849583	0.98263	0.992722	0.605858	1
SC	c353.a2	GRMZM2G068715_P01	Zm00001d007012	moderately similar to ( 248) AT2G37220 | Symbols: | 29 kDa ribonucleoprotein, chloroplast, putative / RNA-binding protein cp29, putative | chr2:15634980-15636331 REVERSEmoderately similar to ( 246) ROC1_NICSY 29 kDa ribonucleoprotein A, chloroplast precursor (CP29A) - Nicotiana sylvestris (Wood tobacco)moderately similar to ( 317) loc_os07g43810 12007.m08606 protein ribonucleoprotein A, chloropla…	Transcription	30.285	5.81298	0.000202734	0.000359604	0.283664	0.413645	0.678249	1
SC	c436.a1	GRMZM2G081886_P01	Zm00001d002051	highly similar to ( 765) AT4G34200 | Symbols: EDA9 | EDA9 (embryo sac development arrest 9); ATP binding | chr4:16374041-16376561 REVERSEweakly similar to ( 104) DHGY_CUCSA Glycerate dehydrogenase (EC 1.1.1.29) (NADH-dependent hydroxypyruvate reductase) (HPR) (GDH) - Cucumis sativus (Cucumber)highly similar to ( 868) loc_os04g55720 12004.m35214 protein D-3-phosphoglycerate dehydrogenase, chloropl…	AminoAcid metabolism	29.2792	13.0825	0.000100547	0.000184393	1.01542e-09	1.26285e-08	0.352853	1
SC	c140.a2	GRMZM2G003230_P01	NA	weakly similar to ( 142) ATCG00420 | Symbols: NDHJ | Encodes NADH dehydrogenase subunit J. Its transcription is increased upon sulfur depletion. | chrC:48677-49153 REVERSEweakly similar to ( 164) NDHJ_SACOF NAD(P)H-quinone oxidoreductase chain J, chloroplast (EC 1.6.5.-) (NAD(P)H dehydrogenase, chain J) (NADH-plastoquinone oxidoreductase subunit J) - Saccharum officinarum (Sugarcane)weakly simila…	Energy metabolism	29.1552	4.51249	0.0375605	0.0498045	0.130219	0.232504	0.267184	1
SC	c353.a1	GRMZM2G158835_P01	Zm00001d022237	moderately similar to ( 244) AT2G37220 | Symbols: | 29 kDa ribonucleoprotein, chloroplast, putative / RNA-binding protein cp29, putative | chr2:15634980-15636331 REVERSEmoderately similar to ( 248) ROC1_NICSY 29 kDa ribonucleoprotein A, chloroplast precursor (CP29A) - Nicotiana sylvestris (Wood tobacco)moderately similar to ( 320) loc_os07g43810 12007.m08606 protein ribonucleoprotein A, chloropla…	Transcription	29.084	5.71749	2.31556e-06	4.98099e-06	1.10868e-05	7.89208e-05	0.694154	1
SC	c687.a1	GRMZM2G066222_P01*	Zm00001d053239	weakly similar to ( 150) AT3G61110 | Symbols: ARS27A | ARS27A (ARABIDOPSIS RIBOSOMAL PROTEIN S27); structural constituent of ribosome | chr3:22611710-22612632 FORWARDweakly similar to ( 157) RS27_HORVU 40S ribosomal protein S27 (Manganese efficiency-related protein 1) - Hordeum vulgare (Barley)weakly similar to ( 155) loc_os02g27769 12002.m100798 protein 40S ribosomal protein S27, putative, expre…	Translation	28.005	21.4087	0.0300483	0.0404885	0.330224	0.45808	0.989427	1
SC	c575.a1	GRMZM2G122793_P01	Zm00001d045366	moderately similar to ( 206) AT2G04700 | Symbols: | ferredoxin thioredoxin reductase catalytic beta chain family protein | chr2:1646961-1648345 FORWARDmoderately similar to ( 302) FTRC_MAIZE Ferredoxin-thioredoxin reductase catalytic chain, chloroplast precursor (EC 1.18.-.-) (FTR-C) (Ferredoxin-thioredoxin reductase subunit B) (FTR-B) - Zea mays (Maize)moderately similar to ( 230) loc_os09g07570…	Folding, sorting and degradation	27.8014	6.7121	0	0	0.508267	0.615151	0.924247	1
SC	c460.a2	GRMZM2G177912_P01	Zm00001d044665	highly similar to ( 541) AT1G12840 | Symbols: DET3, ATVHA-C | DET3 (DE-ETIOLATED 3); proton-transporting ATPase, rotational mechanism | chr1:4375584-4378220 FORWARDmoderately similar to ( 453) VATC_HORVU Vacuolar ATP synthase subunit C (EC 3.6.3.14) (V-ATPase C subunit) (Vacuolar proton pump C subunit) - Hordeum vulgare (Barley)highly similar to ( 656) loc_os05g51530 12005.m09215 protein vacuolar…	Membrane transport	26.2457	4.27416	0	0	0.261438	0.388907	0.757685	1
SC	c197.a4	GRMZM2G137528_P01*	Zm00001d016439	highly similar to ( 699) AT5G19990 | Symbols: RPT6A, ATSUG1 | RPT6A (REGULATORY PARTICLE TRIPLE-A ATPASE 6A); ATPase | chr5:6752144-6754918 FORWARDmoderately similar to ( 333) PRS7_PRUPE 26S protease regulatory subunit 7 (26S proteasome subunit 7) (26S proteasome AAA-ATPase subunit RPT1) (Regulatory particle triple-A ATPase subunit 1) - Prunus persica (Peach)highly similar to ( 726) loc_os02g1105…	Folding, sorting and degradation	25.1224	10.7329	0.0827577	0.104975	0.952475	0.968718	0.633905	1
XIC	c494.a1	GRMZM2G141277_P01	Zm00001d010373	weakly similar to ( 149) AT4G25150 | Symbols: | acid phosphatase, putative | chr4:12901736-12902882 REVERSEweakly similar to ( 134) VSPA_SOYBN Stem 28 kDa glycoprotein precursor (Vegetative storage protein A) - Glycine max (Soybean)weakly similar to ( 147) loc_os06g04790 12006.m05208 protein acid phosphatase 1 precursor, putative, expressed seq=cds; coord=8:109218692..109219673:-1; parent_gene=GR…	misc	23.6619	14.4827	0	0	0	0	0.022132	0.349083
XIC	c552.a1	GRMZM2G172204_P02	Zm00001d019312	weakly similar to ( 103) GOS9_ORYSA Protein GOS9 - Oryza sativa (Rice)moderately similar to ( 329) loc_os12g09700 12012.m04954 protein jasmonate-induced protein, putative, expressed seq=cds; coord=7:26152407..26154159:-1; parent_gene=GRMZM2G172204	misc	22.8143	14.0029	0	0	0	0	0.00648741	0.198515
SC	c684.a1	GRMZM5G817037_P02	Zm00001d006085	moderately similar to ( 350) AT3G60820 | Symbols: PBF1 | PBF1; peptidase/ threonine-type endopeptidase | chr3:22472038-22473809 REVERSEmoderately similar to ( 432) PSB1_ORYSA Proteasome subunit beta type 1 (EC 3.4.25.1) (20S proteasome alpha subunit F) (20S proteasome subunit beta-6) - Oryza sativa (Rice)moderately similar to ( 432) loc_os09g32800 12009.m060031 protein proteasome subunit beta typ…	Folding, sorting and degradation	21.7716	4.45174	0	0	0.0666358	0.138654	0.201517	1
SC	c283.a2	GRMZM2G138800_P01	Zm00001d043249	moderately similar to ( 306) AT5G54500 | Symbols: FQR1 | FQR1 (FLAVODOXIN-LIKE QUINONE REDUCTASE 1); FMN binding / oxidoreductase, acting on NADH or NADPH, quinone or similar compound as acceptor | chr5:22124674-22126256 FORWARDmoderately similar to ( 362) loc_os01g57570 12001.m43222 protein minor allergen Alt a 7, putative, expressed seq=cds; coord=3:190321122..190324751:-1; parent_gene=GRMZM2G1…	Lipid metabolism	21.195	4.42306	0.15416	0.18637	1.23307e-11	1.95005e-10	0.0093367	0.27605
XIC	b84.a1	GRMZM2G374302_P01*	Zm00001d051194	highly similar to ( 506) AT2G16500 | Symbols: ADC1, ARGDC1, ARGDC, SPE1 | ADC1 (ARGININE DECARBOXYLASE 1); arginine decarboxylase | chr2:7150796-7152904 REVERSEhighly similar to ( 787) SPE1_AVESA Arginine decarboxylase (EC 4.1.1.19) (ARGDC) (ADC) - Avena sativa (Oat)highly similar to ( 869) loc_os04g01690 12004.m101428 protein arginine decarboxylase, putative, expressed seq=cds; coord=4:144835678…	AminoAcid metabolism	20.7796	25.6093	0	0	0	0	0.00754244	0.215971
SC	c684.a2	GRMZM5G817037_P01	Zm00001d006085	moderately similar to ( 286) AT3G60820 | Symbols: PBF1 | PBF1; peptidase/ threonine-type endopeptidase | chr3:22472038-22473809 REVERSEmoderately similar to ( 333) PSB1_ORYSA Proteasome subunit beta type 1 (EC 3.4.25.1) (20S proteasome alpha subunit F) (20S proteasome subunit beta-6) - Oryza sativa (Rice)moderately similar to ( 333) loc_os09g32800 12009.m060031 protein proteasome subunit beta typ…	Folding, sorting and degradation	20.2296	4.16398	0	0	0.0636685	0.133667	0.387499	1
SC	c468.a1	GRMZM2G094388_P01	Zm00001d028755	moderately similar to ( 221) AT1G07140 | Symbols: SIRANBP | SIRANBP; Ran GTPase binding | chr1:2192360-2193688 REVERSEmoderately similar to ( 288) loc_os03g18180 12003.m07243 protein ran-binding protein 1 homolog c, putative, expressed seq=cds; coord=1:45438914..45441619:-1; parent_gene=GRMZM2G094388	Signal transduction	19.6182	5.13887	0.427262	0.469338	0.93575	0.956073	0.9814	1
SC	c437.a2	GRMZM2G125893_P01	Zm00001d009774	moderately similar to ( 246) AT4G23900 | Symbols: | nucleoside diphosphate kinase 4 (NDK4) | chr4:12424505-12426318 FORWARDmoderately similar to ( 245) NDK4_SPIOL Nucleoside diphosphate kinase 4, chloroplast precursor (EC 2.7.4.6) (Nucleoside diphosphate kinase IV) (NDK IV) (NDP kinase IV) (NDPK IV) (Nucleoside diphosphate kinase III) - Spinacia oleracea (Spinach)moderately similar to ( 254) loc_…	Nucleotide metabolism	17.6242	11.8918	0.0353067	0.046931	5.09173e-05	0.000311257	0.14165	0.905386
SC	c418.a1	GRMZM2G006130_P01*	Zm00001d044648	highly similar to ( 824) AT3G10740 | Symbols: ASD1, ARAF1, ARAF, ATASD1 | ASD1 (ALPHA-L-ARABINOFURANOSIDASE 1); alpha-N-arabinofuranosidase/ hydrolase, acting on glycosyl bonds / xylan 1,4-beta-xylosidase | chr3:3361031-3364573 REVERSEnearly identical (1156) loc_os11g03730 12011.m61727 protein alpha-N-arabinofuranosidase A precursor, putative, expressed seq=cds; coord=3:230006795..230017669:-1; p…	notassigned	17.5487	6.37967	1.30185e-12	4.75878e-12	1.10302e-05	7.89208e-05	0.676627	1
XIC	c761.a1	GRMZM2G001508_P01*	Zm00001d037681	weakly similar to ( 198) AT4G29260 | Symbols: | acid phosphatase class B family protein | chr4:14422310-14423409 REVERSEweakly similar to ( 186) VSPA_SOYBN Stem 28 kDa glycoprotein precursor (Vegetative storage protein A) - Glycine max (Soybean)moderately similar to ( 247) loc_os05g10210 12005.m05493 protein stem 28 kDa glycoprotein precursor, putative, expressed seq=cds; coord=6:129792758..12979…	misc	16.2944	23.4917	0	0	0	0	0.000416099	0.0453119
SC	c323.a2	GRMZM2G025992_P01*	Zm00001d022505	moderately similar to ( 256) AT1G08830 | Symbols: CSD1 | CSD1 (COPPER/ZINC SUPEROXIDE DISMUTASE 1); superoxide dismutase | chr1:2827700-2829053 FORWARDmoderately similar to ( 311) SODC2_MAIZE Superoxide dismutase [Cu-Zn] 2 (EC 1.15.1.1) - Zea mays (Maize)moderately similar to ( 285) loc_os07g46990 12007.m079585 protein superoxide dismutase 2, putative, expressed seq=cds; coord=7:171733893..171737…	Folding, sorting and degradation	15.2656	10.0571	0.000129906	0.000235442	3.07495e-05	0.000200427	0.751468	1
XIC	d1361.a1	GRMZM2G137648_P01*	NA	highly similar to ( 914) ATCG01010 | Symbols: NDHF | Chloroplast encoded NADH dehydrogenase unit. | chrC:110398-112638 REVERSEnearly identical (1367) NU5C_MAIZE NAD(P)H-quinone oxidoreductase chain 5, chloroplast (EC 1.6.5.-) (NAD(P)H dehydrogenase, chain 5) (NADH-plastoquinone oxidoreductase chain 5) - Zea mays (Maize)nearly identical (1217) loc_osp1g00880 11562.m00079 protein NADH dehydrogenase…	Energy metabolism	15.2114	9.34543	1.11022e-16	2.02708e-16	0.00170788	0.00194671	0.0301778	0.384767
XIC	c223.a1	GRMZM2G158394_P04	Zm00001d022630	weakly similar to ( 138) AT1G14220 | Symbols: | ribonuclease T2 family protein | chr1:4858642-4859601 REVERSEmoderately similar to ( 263) loc_os09g36700 12009.m06619 protein extracellular ribonuclease LE precursor, putative, expressed seq=cds; coord=7:176215251..176216522:1; parent_gene=GRMZM2G158394	Transcription	14.5119	5.69115	0	0	0	0	0.0278459	0.378425
XIC	c191.a1	GRMZM2G044132_P01	Zm00001d003712	seq=cds; coord=2:53844493..53846005:1; parent_gene=GRMZM2G044132	notassigned	13.656	4.93721	0	0	0.000259452	0.000306182	0.0378944	0.429927
SC	c464.a2	GRMZM2G162688_P01	Zm00001d017401	highly similar to ( 736) AT1G62740 | Symbols: | stress-inducible protein, putative | chr1:23231026-23233380 FORWARDhighly similar to ( 607) STIP_SOYBN Heat shock protein STI (Stress-inducible protein) (GmSTI) - Glycine max (Soybean)highly similar to ( 882) loc_os02g43020 12002.m09337 protein heat shock protein STI, putative, expressed seq=cds; coord=5:189820639..189827796:1; parent_gene=GRMZM2G16…	Folding, sorting and degradation	13.4391	9.31157	0.337689	0.382596	0.504284	0.612386	0.93216	1
SC	b24.a4	GRMZM2G313678_P01	Zm00001d012846	highly similar to ( 676) AT4G02930 | Symbols: | elongation factor Tu, putative / EF-Tu, putative | chr4:1295751-1298354 REVERSEmoderately similar to ( 492) EFTU_CHLVU Elongation factor Tu (EF-Tu) - Chlorella vulgaris (Green alga)highly similar to ( 736) loc_os03g63410 12003.m34958 protein elongation factor Tu, mitochondrial precursor, putative, expressed seq=cds; coord=5:1033053..1037664:1; paren…	Translation	13.1094	6.37041	0.00555411	0.00832348	0.280593	0.411508	0.771568	1
XIC	c778.a1	GRMZM2G017110_P02	Zm00001d031749	highly similar to ( 781) AT5G17330 | Symbols: GAD, GAD1 | GAD; calmodulin binding / glutamate decarboxylase | chr5:5711141-5714839 FORWARDhighly similar to ( 785) DCE_PETHY Glutamate decarboxylase (EC 4.1.1.15) (GAD) - Petunia hybrida (Petunia)highly similar to ( 870) loc_os08g36320 12008.m080179 protein glutamate decarboxylase, putative, expressed seq=cds; coord=1:198230317..198233618:-1; parent…	AminoAcid metabolism	12.8964	7.5313	0	0	0	0	0.0752516	0.56508
XIC	c113.a2	GRMZM2G162388_P01	Zm00001d050635	moderately similar to ( 268) AT2G21130 | Symbols: | peptidyl-prolyl cis-trans isomerase / cyclophilin (CYP2) / rotamase | chr2:9055619-9056143 REVERSEmoderately similar to ( 304) CYPH_MAIZE Peptidyl-prolyl cis-trans isomerase (EC 5.2.1.8) (PPIase) (Rotamase) (Cyclophilin) (Cyclosporin A-binding protein) - Zea mays (Maize)moderately similar to ( 277) loc_os02g02890 12002.m05639 protein peptidyl-pr…	Cell growth and death	12.872	7.94076	0	0	0.000111847	0.000134259	0.980715	1
SC	c447.a1	GRMZM2G168762_P01	Zm00001d015134	moderately similar to ( 263) AT2G21870 | Symbols: | unknown protein | chr2:9320456-9322618 REVERSEmoderately similar to ( 366) loc_os02g03860 12002.m05735 protein mitochondrial ATP synthase precursor, putative, expressed seq=cds; coord=5:74616842..74620998:-1; parent_gene=GRMZM2G168762	Energy metabolism	12.7331	11.3019	7.12022e-07	1.61511e-06	0.000442056	0.00221438	0.778975	1
XIC	c996.a1	GRMZM5G835542_P01	Zm00001d051458	moderately similar to ( 292) AT1G63970 | Symbols: ISPF, MECPS | ISPF; 2-C-methyl-D-erythritol 2,4-cyclodiphosphate synthase | chr1:23738923-23740336 REVERSEmoderately similar to ( 291) ISPF_CATRO 2-C-methyl-D-erythritol 2,4-cyclodiphosphate synthase, chloroplast precursor (EC 4.6.1.12) (MECPS) (MECDP-synthase) - Catharanthus roseus (Rosy periwinkle) (Madagascar periwinkle)moderately similar to ( …	Biosynthesis of other secondary metabolites	12.6739	5.05398	5.09592e-14	8.68655e-14	0	0	0.000552261	0.0453119
XIC	b57.a3	GRMZM2G088212_P01	Zm00001d014848	highly similar to ( 903) AT4G35090 | Symbols: CAT2 | CAT2 (CATALASE 2); catalase | chr4:16701105-16703215 REVERSEnearly identical (1033) CATA1_MAIZE Catalase isozyme 1 (EC 1.11.1.6) - Zea mays (Maize)nearly identical (1004) loc_os06g51150 12006.m32203 protein catalase isozyme B, putative, expressed seq=cds; coord=5:63564993..63569468:1; parent_gene=GRMZM2G088212	Folding, sorting and degradation	12.4881	4.68142	1.11022e-15	1.95885e-15	1.08129e-08	1.55815e-08	0.357482	0.86817
SC	c302.a3	GRMZM2G438814_P01	Zm00001d031348	moderately similar to ( 273) AT2G37190 | Symbols: | 60S ribosomal protein L12 (RPL12A) | chr2:15619559-15620059 REVERSEmoderately similar to ( 231) RL12_CHLRE 60S ribosomal protein L12 (Fragment) - Chlamydomonas reinhardtiimoderately similar to ( 286) loc_os04g50990 12004.m09996 protein 60S ribosomal protein L12, putative, expressed seq=cds; coord=1:184889562..184890062:1; parent_gene=GRMZM2G4388…	Translation	11.8979	4.15565	0.00027584	0.00048061	0.519503	0.624977	0.473726	1
SC	b19.a9	GRMZM2G415007_P01	Zm00001d054043	nearly identical (1055) AT5G42020 | Symbols: BIP | BIP2; ATP binding | chr5:16807697-16810480 REVERSEnearly identical (1158) BIP3_MAIZE Luminal-binding protein 3 precursor (BiP3) - Zea mays (Maize)nearly identical (1140) loc_os02g02410 12002.m05590 protein luminal-binding protein 3 precursor, putative, expressed seq=cds; coord=4:240050091..240053865:1; parent_gene=GRMZM2G415007	Folding, sorting and degradation	11.4086	4.70282	1.7378e-10	5.35697e-10	7.83275e-05	0.0004606	0.375941	1
SC	c236.a2	GRMZM2G031107_P01*	Zm00001d017119	highly similar to ( 800) AT5G40760 | Symbols: G6PD6 | G6PD6 (GLUCOSE-6-PHOSPHATE DEHYDROGENASE 6); glucose-6-phosphate dehydrogenase | chr5:16311284-16314556 FORWARDhighly similar to ( 816) G6PD_SOLTU Glucose-6-phosphate 1-dehydrogenase, cytoplasmic isoform (EC 1.1.1.49) (G6PD) - Solanum tuberosum (Potato)highly similar to ( 922) loc_os02g38840 12002.m77828 protein glucose-6-phosphate 1-dehydroge…	Carbohydrate metabolism	11.323	10.1969	0.0119746	0.017161	0.00303695	0.0114894	0.751459	1
XIC	c788.a1	GRMZM2G058310_P01	Zm00001d021702	highly similar to ( 655) AT4G15210 | Symbols: ATBETA-AMY, AT-BETA-AMY, RAM1 | BAM5 (BETA-AMYLASE 5); beta-amylase | chr4:8666852-8669357 REVERSEnearly identical (1011) AMYB_MAIZE Beta-amylase (EC 3.2.1.2) (1,4-alpha-D-glucan maltohydrolase) - Zea mays (Maize)highly similar to ( 894) loc_os07g35940 12007.m07847 protein beta-amylase, putative seq=cds; coord=7:155357370..155360570:1; parent_gene=GRM…	Carbohydrate metabolism	11.3	24.9747	0	0	0	0	0.0458887	0.488416
SC	c332.a2	GRMZM2G028640_P01	Zm00001d003552	weakly similar to ( 166) AT4G10300 | Symbols: | FUNCTIONS IN: molecular_function unknown; LOCATED IN: chloroplast; EXPRESSED IN: 22 plant structures; EXPRESSED DURING: 14 growth stages; CONTAINS InterPro DOMAIN/s: Cupin, RmlC-type (InterPro:IPR011051), Protein of unknown function DUF861, cupin-3 (InterPro:IPR008579), RmlC-like jelly roll fold (InterPro:IPR014710); BEST Arabidopsis thaliana protei…	notassigned	10.6718	7.25102	1.99152e-11	6.65069e-11	3.3473e-10	4.31164e-09	0.686843	1
XIC	c997.a1	GRMZM2G051943_P01	Zm00001d003190	moderately similar to ( 321) AT2G43590 | Symbols: | chitinase, putative | chr2:18081592-18082749 REVERSEhighly similar to ( 515) CHIA_MAIZE Endochitinase A precursor (EC 3.2.1.14) (Seed chitinase A) - Zea mays (Maize)moderately similar to ( 377) loc_os04g41680 12004.m09144 protein endochitinase A precursor, putative, expressed seq=cds; coord=2:33534101..33535449:1; parent_gene=GRMZM2G051943	Environmental adaptation	9.71291	14.7075	0	0	0	0	0.0840584	0.58552
SC	c597.a1	GRMZM2G320325_P01*	Zm00001d029039	moderately similar to ( 357) AT3G10670 | Symbols: ATNAP7 | ATNAP7; ATPase, coupled to transmembrane movement of substances / protein binding / transporter | chr3:3335325-3337304 REVERSEmoderately similar to ( 397) loc_os03g21490 12003.m34858 protein ATP-dependent transporter ycf16, putative, expressed seq=cds; coord=1:55070838..55075644:-1; parent_gene=GRMZM2G320325	Membrane transport	9.67416	9.38181	0.527543	0.567962	0.144916	0.252903	0.913396	1
SC	c419.a2	GRMZM2G067303_P01*	NA	weakly similar to ( 192) AT5G62300 | Symbols: | 40S ribosomal protein S20 (RPS20C) | chr5:25021388-25022235 REVERSEweakly similar to ( 193) RS20_ORYSA 40S ribosomal protein S20 - Oryza sativa (Rice)moderately similar to ( 236) loc_os03g14530 12003.m06893 protein 40S ribosomal protein S20, putative, expressed seq=cds; coord=9:142495842..142498679:-1; parent_gene=GRMZM2G067303	Translation	9.50027	3.47282	2.82531e-07	6.67465e-07	0.987204	0.993403	0.58392	1
SC	c197.a3	GRMZM2G038126_P01*	Zm00001d015886	highly similar to ( 727) AT5G58290 | Symbols: RPT3 | RPT3 (REGULATORY PARTICLE TRIPLE-A ATPASE 3); ATPase | chr5:23569155-23571116 FORWARDhighly similar to ( 716) PRS6B_SOLTU 26S protease regulatory subunit 6B homolog - Solanum tuberosum (Potato)highly similar to ( 753) loc_os02g21970 12002.m07435 protein 26S protease regulatory subunit 6B, putative, expressed seq=cds; coord=4:99305777..99313584:…	Folding, sorting and degradation	9.38783	4.63389	0.00638622	0.0094656	0.0623511	0.131922	0.521254	1
SC	b29.a5	GRMZM2G133044_P01	NA	NA	NA	9.34081	3.7601	3.40691e-09	9.50073e-09	0.698307	0.77974	0.950912	1
SC	b19.a8	GRMZM2G114793_P01	Zm00001d014993	nearly identical (1024) AT5G42020 | Symbols: BIP | BIP2; ATP binding | chr5:16807697-16810480 REVERSEnearly identical (1125) BIP2_MAIZE Luminal-binding protein 2 precursor (BiP2) (Heat shock protein 70 homolog 2) (B70) (B-70) - Zea mays (Maize)nearly identical (1103) loc_os02g02410 12002.m05590 protein luminal-binding protein 3 precursor, putative, expressed seq=cds; coord=5:69325342..69329214:-1…	Folding, sorting and degradation	9.15779	4.66027	0.0325011	0.0435764	0.000243275	0.00130957	0.643237	1
XIC	c814.a1	GRMZM2G136453_P01	Zm00001d031657	highly similar to ( 832) AT5G50400 | Symbols: ATPAP27, PAP27 | PAP27 (PURPLE ACID PHOSPHATASE 27); acid phosphatase/ protein serine/threonine phosphatase | chr5:20523575-20526231 REVERSEhighly similar to ( 645) NPP_HORVU Nucleotide pyrophosphatase/phosphodiesterase (EC 3.-.-.-) (Fragments) - Hordeum vulgare (Barley)nearly identical (1032) loc_os08g41880 12008.m08166 protein nucleotide pyrophospha…	misc	8.90898	8.65862	0	0	0	0	0.00032416	0.0453119
SC	c197.a2	GRMZM2G027282_P01*	Zm00001d018409	highly similar to ( 771) AT3G05530 | Symbols: RPT5A, ATS6A.2 | RPT5A (REGULATORY PARTICLE TRIPLE-A ATPASE 5A); ATPase/ calmodulin binding | chr3:1603540-1605993 FORWARDhighly similar to ( 792) PRS6A_ORYSA 26S protease regulatory subunit 6A homolog (TAT-binding protein homolog 1) (TBP-1) - Oryza sativa (Rice)highly similar to ( 800) loc_os06g07630 12006.m05485 protein 26S protease regulatory subun…	Folding, sorting and degradation	8.90051	6.2193	0.123886	0.151979	0.0696827	0.143887	0.685795	1
SC	c197.a1	GRMZM2G032505_P02*	Zm00001d037481	highly similar to ( 736) AT3G05530 | Symbols: RPT5A, ATS6A.2 | RPT5A (REGULATORY PARTICLE TRIPLE-A ATPASE 5A); ATPase/ calmodulin binding | chr3:1603540-1605993 FORWARDhighly similar to ( 752) PRS6A_ORYSA 26S protease regulatory subunit 6A homolog (TAT-binding protein homolog 1) (TBP-1) - Oryza sativa (Rice)highly similar to ( 761) loc_os06g07630 12006.m05485 protein 26S protease regulatory subun…	Folding, sorting and degradation	8.76589	5.25078	0.0198915	0.0273825	0.181456	0.304841	0.547935	1
SC	c457.a2	GRMZM2G146754_P01	Zm00001d050339	moderately similar to ( 328) AT3G48170 | Symbols: ALDH10A9 | ALDH10A9; 3-chloroallyl aldehyde dehydrogenase/ oxidoreductase | chr3:17786290-17789918 REVERSEmoderately similar to ( 322) BADH_ORYSA Betaine-aldehyde dehydrogenase (EC 1.2.1.8) (BADH) - Oryza sativa (Rice)moderately similar to ( 374) loc_os08g32870 12008.m07279 protein betaine-aldehyde dehydrogenase, putative, expressed seq=cds; coord…	Biosynthesis of other secondary metabolites	8.75613	3.38822	0	0	0.562495	0.665886	0.774888	1
SC	c287.a2	GRMZM2G454085_P01	NA	weakly similar to ( 177) ATCG00780 | Symbols: RPL14 | encodes a chloroplast ribosomal protein L14, a constituent of the large subunit of the ribosomal complex | chrC:80696-81064 REVERSEmoderately similar to ( 219) RK14_SACOF Chloroplast 50S ribosomal protein L14 - Saccharum officinarum (Sugarcane)moderately similar to ( 209) loc_osp1g00710 11562.m00062 protein ribosomal protein L14 seq=cds; coord…	Translation	8.70756	6.98479	0.137231	0.1674	0.455891	0.562463	0.543732	1
XIC	d1682.a1	GRMZM2G401664_P01	Zm00001d021318	moderately similar to ( 429) AT4G38690 | Symbols: | 1-phosphatidylinositol phosphodiesterase-related | chr4:18074743-18075699 REVERSEhighly similar to ( 532) loc_os09g36520 12009.m06601 protein ki1 protein, putative, expressed seq=cds; coord=7:143820122..143821948:-1; parent_gene=GRMZM2G401664	Lipid metabolism	8.57086	6.6318	0	0	0	0	0.0649488	0.5483
SC	c341.a2	GRMZM2G019912_P01	NA	NA	NA	8.48082	4.78299	0.00101129	0.00164791	0.820146	0.877742	0.782865	1
SC	c597.a2	GRMZM2G320325_P02	Zm00001d029039	moderately similar to ( 346) AT3G10670 | Symbols: ATNAP7 | ATNAP7; ATPase, coupled to transmembrane movement of substances / protein binding / transporter | chr3:3335325-3337304 REVERSEmoderately similar to ( 385) loc_os03g21490 12003.m34858 protein ATP-dependent transporter ycf16, putative, expressed seq=cds; coord=1:55070838..55075642:-1; parent_gene=GRMZM2G320325	Membrane transport	8.4107	10.743	0.620865	0.656031	0.00875007	0.028346	0.750895	1
SC	c457.a1	GRMZM2G016189_P01	Zm00001d032257	highly similar to ( 628) AT1G74920 | Symbols: ALDH10A8 | ALDH10A8; 3-chloroallyl aldehyde dehydrogenase/ oxidoreductase | chr1:28139175-28142573 REVERSEhighly similar to ( 605) BADH_ORYSA Betaine-aldehyde dehydrogenase (EC 1.2.1.8) (BADH) - Oryza sativa (Rice)highly similar to ( 711) loc_os08g32870 12008.m07279 protein betaine-aldehyde dehydrogenase, putative, expressed seq=cds; coord=1:216050547…	Biosynthesis of other secondary metabolites	8.39803	3.32513	0	0	0.788002	0.850917	0.963837	1
XIC	c941.a1	GRMZM2G125032_P01	Zm00001d042140	moderately similar to ( 290) AT4G16260 | Symbols: | catalytic/ cation binding / hydrolase, hydrolyzing O-glycosyl compounds | chr4:9200180-9201441 REVERSEmoderately similar to ( 457) E13B_HORVU Glucan endo-1,3-beta-glucosidase GII precursor (EC 3.2.1.39) ((1->3)-beta-glucan endohydrolase GII) ((1->3)-beta-glucanase isoenzyme GII) (Beta-1,3-endoglucanase GII) - Hordeum vulgare (Barley)moderately s…	Carbohydrate metabolism	8.31091	57.2572	0	0	0	0	0.072947	0.564277
SC	c251.a2	GRMZM2G359559_P01	Zm00001d031403	moderately similar to ( 445) AT2G13360 | Symbols: AGT, AGT1 | AGT (ALANINE:GLYOXYLATE AMINOTRANSFERASE); alanine-glyoxylate transaminase/ serine-glyoxylate transaminase/ serine-pyruvate transaminase | chr2:5539417-5540902 REVERSEweakly similar to ( 106) SGAT_MAIZE Serine--glyoxylate aminotransferase (EC 2.6.1.45) (SGAT) (Alanine--glyoxylate aminotransferase) (EC 2.6.1.44) (AGT) (Fragments) - Zea …	AminoAcid metabolism	8.28212	6.49013	0.676778	0.709568	0.000789735	0.00369911	0.918701	1
XIC	c955.a1	GRMZM2G068665_P01	Zm00001d042117	moderately similar to ( 337) AT5G14800 | Symbols: P5CR, AT-P5R, AT-P5C1, EMB2772 | P5CR (PYRROLINE-5- CARBOXYLATE (P5C) REDUCTASE); pyrroline-5-carboxylate reductase | chr5:4786353-4787618 REVERSEmoderately similar to ( 345) P5CR_SOYBN Pyrroline-5-carboxylate reductase (EC 1.5.1.2) (P5CR) (P5C reductase) - Glycine max (Soybean)moderately similar to ( 434) loc_os01g71990 12001.m13237 protein pyrro…	AminoAcid metabolism	8.23459	4.45689	0	0	0	0	0.214526	0.755247
XIC	c732.a2	GRMZM2G174906_P01*	Zm00001d038886	weakly similar to ( 122) loc_os05g47470 12005.m83934 protein VIP1 protein, putative, expressed seq=cds; coord=6:162189576..162190621:1; parent_gene=GRMZM2G174906	notassigned	8.1219	5.21537	0.00011969	0.000155869	0	0	0.658723	1
SC	c206.a2	GRMZM2G057576_P01	Zm00001d023218	nearly identical (2949) AT3G11130 | Symbols: | clathrin heavy chain, putative | chr3:3482575-3491667 REVERSEnearly identical (3114) loc_os11g01380 12011.m04343 protein clathrin heavy chain, putative, expressed seq=cds; coord=10:1135114..1145295:1; parent_gene=GRMZM2G057576	Transport and catabolism	8.04067	2.56046	0.0198281	0.02733	0.198416	0.321868	0.930758	1
SC	c206.a1	GRMZM2G073792_P01*	NA	NA	NA	7.99836	2.56353	0.0203251	0.0278753	0.21373	0.338074	0.945049	1
SC	b59.a5	GRMZM2G084025_P02	NA	NA	NA	7.97258	7.4547	2.23106e-11	7.42771e-11	0.027869	0.0698999	0.131237	0.883158
XIC	d1154.a1	GRMZM2G082271_P01	Zm00001d023741	nearly identical (1300) AT1G50200 | Symbols: ALATS, ACD | ALATS (ALANYL-TRNA SYNTHETASE); ATP binding / alanine-tRNA ligase/ ligase, forming aminoacyl-tRNA and related compounds / nucleic acid binding / nucleotide binding | chr1:18591429-18598311 REVERSEnearly identical (1581) loc_os10g10244 12010.m04361 protein alanyl-tRNA synthetase, mitochondrial precursor, putative, expressed seq=cds; coord=1…	Translation	7.91486	3.54557	0	0	4.80798e-09	7.01675e-09	1.34622e-07	0.000164777
SC	c304.a2	GRMZM2G010868_P01*	Zm00001d044686	very weakly similar to (95.1) AT2G38540 | Symbols: LP1, LTP1, ATLTP1 | LP1; calmodulin binding | chr2:16130418-16130893 FORWARDweakly similar to ( 154) NLTP_MAIZE Nonspecific lipid-transfer protein precursor (LTP) (Phospholipid transfer protein) (PLTP) (Allergen Zea m 14) - Zea mays (Maize)weakly similar to ( 141) loc_os11g24070 12011.m06333 protein nonspecific lipid-transfer protein 1 precursor,…	Lipid metabolism	7.85666	3.9453	0	0	0.000878757	0.00406331	0.615999	1
XIC	c383.a1	GRMZM2G181192_P01*	Zm00001d024245	moderately similar to ( 441) AT1G67280 | Symbols: | lactoylglutathione lyase, putative / glyoxalase I, putative | chr1:25188563-25190134 REVERSEhighly similar to ( 522) LGUL_ORYSA Lactoylglutathione lyase (EC 4.4.1.5) (Methylglyoxalase) (Aldoketomutase) (Glyoxalase I) (Glx I) (Ketone-aldehyde mutase) (S-D-lactoylglutathione methylglyoxal lyase) (Allergen Ory s ?) (Allergen Glb33) (PP33) - Oryza s…	Xenobiotics degradation and metabolism	7.41916	2.52262	0	0	0	0	0.000326717	0.0453119
XIC	c754.a1	GRMZM2G099045_P01	Zm00001d012465	highly similar to ( 730) AT4G04770 | Symbols: ATABC1, LAF6, ATNAP1 | ATABC1 (ATP BINDING CASSETTE PROTEIN 1); ATPase, coupled to transmembrane movement of substances / protein binding / transporter | chr4:2427998-2429785 REVERSEhighly similar to ( 916) loc_os01g61400 12001.m12266 protein expressed protein seq=cds; coord=8:169789008..169792907:1; parent_gene=GRMZM2G099045	Membrane transport	7.26295	3.81582	0	0	3.27091e-05	3.99108e-05	0.0677215	0.550216
SC	b30.a9	GRMZM2G107756_P01*	Zm00001d036226	moderately similar to ( 407) AT3G02520 | Symbols: GRF7, GF14 NU | GRF7 (GENERAL REGULATORY FACTOR 7); protein binding / protein phosphorylated amino acid binding | chr3:526800-527915 REVERSEmoderately similar to ( 439) 14333_ORYSA 14-3-3-like protein GF14-C (G-box factor 14-3-3 homolog C) - Oryza sativa (Rice)moderately similar to ( 439) loc_os08g33370 12008.m26501 protein 14-3-3-like protein, pu…	Signal transduction	7.24209	4.52666	0.00162143	0.00259525	0.0392731	0.0900285	0.925811	1
SC	c516.a2	GRMZM2G132929_P02*	Zm00001d039106	weakly similar to ( 186) AT2G32060 | Symbols: | 40S ribosomal protein S12 (RPS12C) | chr2:13639228-13640104 REVERSEmoderately similar to ( 259) RS12_HORVU 40S ribosomal protein S12 - Hordeum vulgare (Barley)moderately similar to ( 256) loc_os07g12650 12007.m079809 protein 40S ribosomal protein S12, putative, expressed seq=cds; coord=6:165961231..165962988:-1; parent_gene=GRMZM2G132929	Translation	7.18611	2.78249	0	0	0.862723	0.906977	0.915827	1
XIC	c132.a1	GRMZM2G480850_P01	Zm00001d044925	weakly similar to ( 103) AT2G47400 | Symbols: CP12-1, CP12 | CP12-1 | chr2:19446889-19447263 FORWARDweakly similar to ( 120) loc_os01g19740 12001.m08511 protein CP12-1, putative, expressed seq=cds; coord=9:7771309..7772076:-1; parent_gene=GRMZM2G480850	Energy metabolism	7.1258	3.23363	0	0	0.00170431	0.00194558	0.902387	1
SC	c309.a1	GRMZM2G017419_P01	Zm00001d024835	weakly similar to ( 181) AT5G16400 | Symbols: TRXF2, ATF2 | ATF2; enzyme activator | chr5:5363905-5365249 REVERSEweakly similar to ( 188) TRXF_PEA Thioredoxin F-type, chloroplast precursor (TRX-F) - Pisum sativum (Garden pea)moderately similar to ( 259) loc_os01g68480 12001.m12951 protein thioredoxin F-type, chloroplast precursor, putative, expressed seq=cds; coord=10:89922124..89924191:1; parent…	Folding, sorting and degradation	6.98966	3.00102	2.69375e-06	5.74879e-06	0.624623	0.723599	0.223131	1
XIC	c774.a1	GRMZM2G453805_P01	Zm00001d043988	moderately similar to ( 344) AT5G24090 | Symbols: | acidic endochitinase (CHIB1) | chr5:8143805-8145153 REVERSEmoderately similar to ( 363) CHIA_PHAAN Acidic endochitinase precursor (EC 3.2.1.14) - Phaseolus angularis (Adzuki bean) (Vigna angularis)moderately similar to ( 443) loc_os01g47070 12001.m10903 protein acidic endochitinase precursor, putative, expressed seq=cds; coord=3:212009199..21201…	Environmental adaptation	6.94859	7.10251	8.69766e-08	1.26347e-07	0	0	1.06998e-05	0.00436551
SC	c308.a1	GRMZM2G151041_P01*	Zm00001d025240	nearly identical (1732) AT5G65750 | Symbols: | 2-oxoglutarate dehydrogenase E1 component, putative / oxoglutarate decarboxylase, putative / alpha-ketoglutaric dehydrogenase, putative | chr5:26304212-26307947 FORWARDnearly identical (1779) loc_os04g32020 12004.m101710 protein 2-oxoglutarate dehydrogenase E1 component, mitochondrial precursor, putative, expressed seq=cds; coord=10:109798193..109804…	Carbohydrate metabolism	6.87461	4.46039	7.77156e-15	3.44624e-14	0.227196	0.349387	0.876597	1
SC	c303.a1	GRMZM2G156486_P01*	Zm00001d027876	moderately similar to ( 459) AT5G12040 | Symbols: | carbon-nitrogen hydrolase family protein | chr5:3885162-3887772 FORWARDhighly similar to ( 506) loc_os03g07910 12003.m06302 protein expressed protein seq=cds; coord=1:15990466..15995048:1; parent_gene=GRMZM2G156486	misc	6.83698	7.71693	0	0	0	0	0.710937	1
XIC	c987.a1	GRMZM2G126261_P01*	Zm00001d022456	moderately similar to ( 256) AT5G05340 | Symbols: | peroxidase, putative | chr5:1579142-1580819 REVERSEmoderately similar to ( 276) PER2_ORYSA Peroxidase 2 precursor (EC 1.11.1.7) - Oryza sativa (Rice)moderately similar to ( 279) loc_os07g47990 12007.m29327 protein peroxidase 2 precursor, putative, expressed seq=cds; coord=7:172779034..172780693:1; parent_gene=GRMZM2G126261	Carbohydrate metabolism	6.83233	10.7964	9.88098e-15	1.70278e-14	0	0	0.265541	0.788889
SC	c157.a2	GRMZM2G061990_P01	Zm00001d044250	nearly identical (1780) AT1G29900 | Symbols: CARB | CARB (CARBAMOYL PHOSPHATE SYNTHETASE B); ATP binding / carbamoyl-phosphate synthase/ catalytic | chr1:10468164-10471976 FORWARDnearly identical (2070) loc_os01g38970 12001.m10177 protein carbamoyl-phosphate synthase large chain, putative, expressed seq=cds; coord=3:219370471..219375471:1; parent_gene=GRMZM2G061990	Nucleotide metabolism	6.78748	2.76768	5.30553e-12	1.82821e-11	0.000730066	0.00346461	0.0450792	0.586395
SC	c112.a2	GRMZM5G871576_P01	NA	NA	NA	6.67421	3.12316	0	0	0.609596	0.708468	0.954487	1
SC	c453.a3	GRMZM5G862131_P01	Zm00001d043905	moderately similar to ( 305) AT1G16890 | Symbols: UBC36, UBC13B | ubiquitin-conjugating enzyme, putative | chr1:5776550-5778327 REVERSEweakly similar to ( 123) UBC2_WHEAT Ubiquitin-conjugating enzyme E2-17 kDa (EC 6.3.2.19) (Ubiquitin-protein ligase) (Ubiquitin carrier protein) - Triticum aestivum (Wheat)moderately similar to ( 307) loc_os01g48280 12001.m43137 protein ubiquitin-conjugating enzyme…	Folding, sorting and degradation	6.54203	5.60219	0.000162624	0.000290362	0.0154345	0.0448927	0.978834	1
XIC	b80.a1	GRMZM2G162748_P01	Zm00001d016134	moderately similar to ( 315) AT4G03280 | Symbols: PETC, PGR1 | PETC (PHOTOSYNTHETIC ELECTRON TRANSFER C); electron transporter, transferring electrons from cytochrome b6/f complex of photosystem II | chr4:1440462-1441717 FORWARDmoderately similar to ( 397) UCRIA_ORYSA Cytochrome b6-f complex iron-sulfur subunit, chloroplast precursor (EC 1.10.99.1) (Rieske iron-sulfur protein) (Plastohydroquinone…	Energy metabolism	6.45441	3.71257	4.90014e-06	6.72233e-06	0.193922	0.200785	0.24713	0.779325
SC	c308.a2	GRMZM2G142863_P01*	Zm00001d003947	nearly identical (1729) AT5G65750 | Symbols: | 2-oxoglutarate dehydrogenase E1 component, putative / oxoglutarate decarboxylase, putative / alpha-ketoglutaric dehydrogenase, putative | chr5:26304212-26307947 FORWARDnearly identical (1779) loc_os04g32020 12004.m101710 protein 2-oxoglutarate dehydrogenase E1 component, mitochondrial precursor, putative, expressed seq=cds; coord=2:69290220..69296784…	Carbohydrate metabolism	6.38234	5.00461	2.02061e-14	8.67578e-14	0.0765434	0.154276	0.762067	1
XIC	c301.a1	GRMZM2G056424_P01	Zm00001d029049	weakly similar to ( 171) AT1G03600 | Symbols: | photosystem II family protein | chr1:898916-899440 FORWARDweakly similar to ( 197) loc_os03g21560 12003.m07560 protein photosystem II 11 kD protein, putative, expressed seq=cds; coord=1:55454558..55455428:1; parent_gene=GRMZM2G056424	Energy metabolism	6.36947	4.0496	0	0	0.0058048	0.00647379	0.897761	1
SC	c516.a1	GRMZM2G063340_P01*	Zm00001d019219	weakly similar to ( 183) AT2G32060 | Symbols: | 40S ribosomal protein S12 (RPS12C) | chr2:13639228-13640104 REVERSEmoderately similar to ( 244) RS12_HORVU 40S ribosomal protein S12 - Hordeum vulgare (Barley)moderately similar to ( 249) loc_os07g05580 12007.m05022 protein 40S ribosomal protein S12, putative, expressed seq=cds; coord=7:21276565..21279263:-1; parent_gene=GRMZM2G063340	Translation	6.31338	2.76217	0	0	0.906554	0.938652	0.984942	1
SC	c453.a2	GRMZM2G015287_P01	Zm00001d009552	moderately similar to ( 305) AT1G16890 | Symbols: UBC36, UBC13B | ubiquitin-conjugating enzyme, putative | chr1:5776550-5778327 REVERSEweakly similar to ( 124) UBC2_WHEAT Ubiquitin-conjugating enzyme E2-17 kDa (EC 6.3.2.19) (Ubiquitin-protein ligase) (Ubiquitin carrier protein) - Triticum aestivum (Wheat)moderately similar to ( 307) loc_os01g48280 12001.m43137 protein ubiquitin-conjugating enzyme…	Folding, sorting and degradation	6.26136	5.73055	1.50989e-05	3.00313e-05	0.0233852	0.0620165	0.958402	1
XIC	b83.a1	GRMZM5G836250_P03	Zm00001d042727	highly similar to ( 594) AT1G43670 | Symbols: | fructose-1,6-bisphosphatase, putative / D-fructose-1,6-bisphosphate 1-phosphohydrolase, putative / FBPase, putative | chr1:16468184-16470347 FORWARDhighly similar to ( 669) F16P2_SACHY Fructose-1,6-bisphosphatase, cytosolic (EC 3.1.3.11) (D-fructose-1,6-bisphosphate 1-phosphohydrolase) (FBPase) - Saccharum hybrid (Sugarcane)highly similar to ( 642) …	Carbohydrate metabolism	6.24626	5.37775	0	0	0.000559354	0.000653359	0.807073	1
XIC	a9.a3	GRMZM2G155216_P01*	Zm00001d009589	moderately similar to ( 431) AT2G34420 | Symbols: LHB1B2, LHCB1.5 | LHB1B2; chlorophyll binding | chr2:14522716-14523513 REVERSEmoderately similar to ( 483) CB29_MAIZE Chlorophyll a-b binding protein M9, chloroplast precursor (LHCII type I CAB-M9) (LHCP) - Zea mays (Maize)moderately similar to ( 462) loc_os09g17740 12009.m05032 protein chlorophyll a-b binding protein 1, chloroplast precursor, put…	Energy metabolism	6.1226	6.00088	1.16274e-12	1.92971e-12	2.89995e-05	3.54188e-05	0.772934	1
XIC	c524.a1	GRMZM2G377168_P01	Zm00001d016991	seq=cds; coord=5:178086882..178087933:1; parent_gene=GRMZM2G377168	notassigned	6.11009	6.21698	0	0	0.000107359	0.000129242	0.184618	0.749468
SC	c418.a2	GRMZM2G077299_P01*	Zm00001d052425	highly similar to ( 820) AT3G10740 | Symbols: ASD1, ARAF1, ARAF, ATASD1 | ASD1 (ALPHA-L-ARABINOFURANOSIDASE 1); alpha-N-arabinofuranosidase/ hydrolase, acting on glycosyl bonds / xylan 1,4-beta-xylosidase | chr3:3361031-3364573 REVERSEnearly identical (1146) loc_os11g03730 12011.m61727 protein alpha-N-arabinofuranosidase A precursor, putative, expressed seq=cds; coord=4:186274255..186279757:-1; p…	notassigned	6.06189	3.5709	2.84111e-07	6.68278e-07	0.025725	0.0664306	0.916337	1
XIC	c547.a1	GRMZM2G033641_P01	Zm00001d038262	moderately similar to ( 382) AT4G09160 | Symbols: | SEC14 cytosolic factor family protein / phosphoglyceride transfer family protein | chr4:5839761-5842158 FORWARDhighly similar to ( 588) loc_os05g35460 12005.m07776 protein patellin-1, putative, expressed seq=cds; coord=6:148590842..148593721:1; parent_gene=GRMZM2G033641	Membrane transport	5.7683	4.16116	0	0	6.89951e-10	1.03947e-09	0.0165998	0.337593
SC	c423.a1	GRMZM2G354604_P02*	Zm00001d039091	moderately similar to ( 391) AT5G55190 | Symbols: RAN3, ATRAN3 | RAN3 (RAN GTPASE 3); GTP binding / GTPase/ protein binding | chr5:22392285-22393957 FORWARDmoderately similar to ( 391) RAN_VICFA GTP-binding nuclear protein Ran/TC4 - Vicia faba (Broad bean)moderately similar to ( 407) loc_os05g49890 12005.m27986 protein GTP-binding nuclear protein Ran-A1, putative, expressed seq=cds; coord=6:16570…	Signal transduction	5.58551	3.5336	9.16326e-11	2.88216e-10	0.281438	0.411508	0.869614	1
SC	c322.a1	GRMZM2G012863_P01*	Zm00001d045027	highly similar to ( 683) AT5G46290 | Symbols: KAS I | KAS I (3-KETOACYL-ACYL CARRIER PROTEIN SYNTHASE I); catalytic/ fatty-acid synthase | chr5:18774439-18776629 REVERSEhighly similar to ( 698) KASC1_HORVU 3-oxoacyl-[acyl-carrier-protein] synthase I, chloroplast precursor (EC 2.3.1.41) (Beta-ketoacyl-ACP synthase I) (KAS I) - Hordeum vulgare (Barley)highly similar to ( 753) loc_os06g09630 12006.m…	Lipid metabolism	5.56849	2.92299	2.86098e-06	6.08168e-06	0.123497	0.222706	0.382077	1
SC	c304.a1	GRMZM2G101958_P01	Zm00001d023343	very weakly similar to (81.3) AT2G38540 | Symbols: LP1, LTP1, ATLTP1 | LP1; calmodulin binding | chr2:16130418-16130893 FORWARDweakly similar to ( 154) NLTP_MAIZE Nonspecific lipid-transfer protein precursor (LTP) (Phospholipid transfer protein) (PLTP) (Allergen Zea m 14) - Zea mays (Maize)weakly similar to ( 125) loc_os12g02310 12012.m04232 protein nonspecific lipid-transfer protein 2 precursor,…	Lipid metabolism	5.54166	2.97088	0	0	6.68145e-09	7.45291e-08	0.0662087	0.645386
XIC	c493.a1	GRMZM2G089713_P01*	Zm00001d045042	nearly identical (1207) AT3G43190 | Symbols: SUS4, ATSUS4 | SUS4; UDP-glycosyltransferase/ sucrose synthase/ transferase, transferring glycosyl groups | chr3:15179204-15182577 REVERSEnearly identical (1544) SUS1_MAIZE Sucrose synthase 1 (EC 2.4.1.13) (Sucrose-UDP glucosyltransferase 1) (Shrunken-1) - Zea mays (Maize)nearly identical (1484) loc_os06g09450 12006.m091637 protein sucrose synthase 1, …	Carbohydrate metabolism	5.52333	4.60895	0	0	0	0	0.0144199	0.315177
XIC	c733.a1	GRMZM2G442804_P03	Zm00001d036738	moderately similar to ( 392) AT2G41040 | Symbols: | methyltransferase-related | chr2:17121499-17123064 FORWARDhighly similar to ( 548) loc_os06g43800 12006.m091748 protein S-adenosylmethionine-dependent methyltransferase, putative, expressed seq=cds; coord=6:96667631..96671259:1; parent_gene=GRMZM2G442804	AminoAcid metabolism	5.46146	4.81449	2.75584e-08	4.09792e-08	5.16434e-08	7.23468e-08	0.0412489	0.450792
SC	c437.a1	GRMZM5G833747_P01*	Zm00001d039221	moderately similar to ( 306) AT4G23900 | Symbols: | nucleoside diphosphate kinase 4 (NDK4) | chr4:12424505-12426318 FORWARDmoderately similar to ( 298) NDK4_SPIOL Nucleoside diphosphate kinase 4, chloroplast precursor (EC 2.7.4.6) (Nucleoside diphosphate kinase IV) (NDK IV) (NDP kinase IV) (NDPK IV) (Nucleoside diphosphate kinase III) - Spinacia oleracea (Spinach)moderately similar to ( 311) loc_…	Nucleotide metabolism	5.39557	2.71792	0.000889244	0.00145562	9.13766e-11	1.30091e-09	0.213205	1
XIC	c133.a2	GRMZM2G149952_P01	Zm00001d033981	highly similar to ( 645) AT4G14680 | Symbols: APS3 | APS3; sulfate adenylyltransferase (ATP) | chr4:8413443-8415311 REVERSEhighly similar to ( 748) loc_os03g53230 12003.m10296 protein bifunctional 3-phosphoadenosine 5-phosphosulfate synthetase, putative, expressed seq=cds; coord=1:275090703..275094517:-1; parent_gene=GRMZM2G149952	Energy metabolism	5.37691	12.3757	0	0	0	0	0.674327	1
SC	c519.a2	GRMZM5G870446_P02	Zm00001d025574	moderately similar to ( 323) AT4G22240 | Symbols: | plastid-lipid associated protein PAP, putative | chr4:11766090-11767227 REVERSEmoderately similar to ( 418) PAP2_ORYSA Probable plastid-lipid-associated protein 2, chloroplast precursor (Fibrillin-like protein 2) - Oryza sativa (Rice)moderately similar to ( 418) loc_os09g04790 12009.m03848 protein plastid-lipid-associated protein 2, chloroplast …	Cell motility	5.35514	3.802	6.26047e-06	1.2878e-05	0.0305564	0.074464	0.888782	1
XIC	c155.a2	GRMZM2G162276_P01	Zm00001d002721	weakly similar to ( 124) AT1G12090 | Symbols: ELP | ELP (EXTENSIN-LIKE PROTEIN); lipid binding | chr1:4090176-4090589 REVERSEweakly similar to ( 102) CCDP_MAIZE Cortical cell-delineating protein precursor (Root-specific protein ZRP3) - Zea mays (Maize)weakly similar to ( 155) loc_os04g46830 12004.m101609 protein cortical cell-delineating protein precursor, putative, expressed seq=cds; coord=2:191…	misc	5.33483	4.50354	0	0	1.70412e-06	2.22384e-06	0.1128	0.616007
XIC	c144.a1	GRMZM2G120304_P01*	Zm00001d040190	moderately similar to ( 206) AT2G39050 | Symbols: | hydroxyproline-rich glycoprotein family protein | chr2:16303427-16305336 FORWARDmoderately similar to ( 299) loc_os01g01450 12001.m06791 protein stress responsive protein, putative, expressed seq=cds; coord=3:31898226..31901626:-1; parent_gene=GRMZM2G120304	notassigned	5.28188	2.71544	0	0	0	0	0.000667206	0.0507389
SC	c208.a4	GRMZM2G046587_P03	Zm00001d017770	weakly similar to ( 184) AT1G01050 | Symbols: AtPPa1 | AtPPa1 (Arabidopsis thaliana pyrophosphorylase 1); inorganic diphosphatase | chr1:31382-32670 REVERSEmoderately similar to ( 204) IPYR_ORYSA Soluble inorganic pyrophosphatase (EC 3.6.1.1) (Pyrophosphate phospho-hydrolase) (PPase) - Oryza sativa (Rice)moderately similar to ( 204) loc_os02g47600 12002.m100329 protein soluble inorganic pyrophosp…	Nucleotide metabolism	5.20556	4.15597	0.0448178	0.0586371	0.190925	0.315445	0.939459	1
SC	c303.a2	GRMZM2G169365_P01	Zm00001d048292	moderately similar to ( 496) AT5G12040 | Symbols: | carbon-nitrogen hydrolase family protein | chr5:3885162-3887772 FORWARDvery weakly similar to (86.7) AGUB_SOLTU N-carbamoylputrescine amidase (EC 3.5.1.53) - Solanum tuberosum (Potato)highly similar to ( 542) loc_os03g07910 12003.m06302 protein expressed protein seq=cds; coord=9:150816519..150821326:-1; parent_gene=GRMZM2G169365	misc	5.16658	5.11136	0.00080858	0.00132961	5.29358e-06	3.89637e-05	0.994446	1
SC	c212.a1	GRMZM2G023232_P01	Zm00001d037700	nearly identical (1103) AT1G79930 | Symbols: HSP91 | HSP91; ATP binding | chr1:30063924-30067067 REVERSEmoderately similar to ( 282) HSP7C_PETHY Heat shock cognate 70 kDa protein - Petunia hybrida (Petunia)nearly identical (1246) loc_os01g08560 12001.m150497 protein heat shock 70 kDa protein 4, putative, expressed seq=cds; coord=6:130343970..130350095:1; parent_gene=GRMZM2G023232	Folding, sorting and degradation	5.12339	3.94912	0	0	0.0468396	0.1028	0.768587	1
XIC	d1015.a1	GRMZM2G027219_P01	Zm00001d004021	highly similar to ( 572) AT1G08550 | Symbols: NPQ1, AVDE1 | NPQ1 (NON-PHOTOCHEMICAL QUENCHING 1); violaxanthin de-epoxidase | chr1:2707462-2709387 FORWARDhighly similar to ( 684) loc_os04g31040 12004.m35285 protein violaxanthin de-epoxidase, putative, expressed seq=cds; coord=2:74086504..74089290:1; parent_gene=GRMZM2G027219	Biosynthesis of other secondary metabolites	5.09291	4.24793	0	0	4.14264e-11	6.62191e-11	0.010672	0.260059
SC	b75.a2	GRMZM2G443685_P03	NA	NA	NA	5.05837	3.19574	0.0057653	0.00860422	0	0	0.597757	1
XIC	d1140.a1	GRMZM2G073079_P01*	Zm00001d050196	weakly similar to ( 160) AT3G23570 | Symbols: | dienelactone hydrolase family protein | chr3:8458052-8459608 REVERSEmoderately similar to ( 359) E134_MAIZE Endo-1,3;1,4-beta-D-glucanase precursor (EC 3.2.1.-) - Zea mays (Maize)moderately similar to ( 302) loc_os08g14109 12008.m05535 protein retrotransposon protein, putative, Ty1-copia subclass, expressed seq=cds; coord=4:70123057..70124877:1; par…	misc	5.05586	7.72868	0.164373	0.178414	0	0	0.0034113	0.149123
SC	c341.a1	GRMZM2G102829_P01*	Zm00001d005276	highly similar to ( 556) AT4G34110 | Symbols: PAB2, PABP2, ATPAB2 | PAB2 (POLY(A) BINDING 2); RNA binding / translation initiation factor | chr4:16336732-16339892 FORWARDvery weakly similar to (86.7) ROC1_NICSY 29 kDa ribonucleoprotein A, chloroplast precursor (CP29A) - Nicotiana sylvestris (Wood tobacco)highly similar to ( 683) loc_os09g02700 12009.m03642 protein polyadenylate-binding protein 2,…	Transcription	4.99327	2.81616	3.32336e-05	6.36438e-05	0.192133	0.315798	0.309081	1
SC	c319.a1	GRMZM2G079538_P01*	Zm00001d025258	highly similar to ( 541) AT5G55070 | Symbols: | 2-oxoacid dehydrogenase family protein | chr5:22347637-22350409 FORWARDhighly similar to ( 675) loc_os04g32330 12004.m35293 protein dihydrolipoyllysine-residue succinyltransferase component of 2-oxoglutarate dehydrogenase complex, mitochondrial precursor, putative, expressed seq=cds; coord=10:110620918..110626719:1; parent_gene=GRMZM2G079538	Carbohydrate metabolism	4.89141	3.20187	0.223488	0.263414	0.0820435	0.162584	0.592137	1
SC	c319.a2	GRMZM5G807639_P03	Zm00001d003923	highly similar to ( 572) AT5G55070 | Symbols: | 2-oxoacid dehydrogenase family protein | chr5:22347637-22350409 FORWARDhighly similar to ( 752) loc_os04g32330 12004.m35293 protein dihydrolipoyllysine-residue succinyltransferase component of 2-oxoglutarate dehydrogenase complex, mitochondrial precursor, putative, expressed seq=cds; coord=2:66624116..66641809:-1; parent_gene=GRMZM5G807639	Carbohydrate metabolism	4.87501	3.18094	0.240123	0.279971	0.0922549	0.178568	0.565	1
XIC	c654.a1	GRMZM2G110567_P01	Zm00001d024886	moderately similar to ( 208) AT5G60710 | Symbols: | zinc finger (C3HC4-type RING finger) family protein | chr5:24410953-24414849 REVERSEmoderately similar to ( 473) loc_os03g28990 12003.m101366 protein protein binding protein, putative, expressed seq=cds; coord=10:92536953..92538977:1; parent_gene=GRMZM2G110567	Folding, sorting and degradation	4.83337	4.20331	0.000166079	0.000215389	0	0	0.000182207	0.0371701
SC	b24.a3	GRMZM2G022269_P01	Zm00001d034856	highly similar to ( 674) AT4G02930 | Symbols: | elongation factor Tu, putative / EF-Tu, putative | chr4:1295751-1298354 REVERSEmoderately similar to ( 493) EFTU_CHLVU Elongation factor Tu (EF-Tu) - Chlorella vulgaris (Green alga)highly similar to ( 750) loc_os03g63410 12003.m34958 protein elongation factor Tu, mitochondrial precursor, putative, expressed seq=cds; coord=1:298408224..298413579:-1; …	Translation	4.75304	4.17261	8.14588e-05	0.000150922	0.0914962	0.177429	0.548335	1
XIC	a9.a6	GRMZM2G057281_P01*	Zm00001d021784	moderately similar to ( 473) AT5G54270 | Symbols: LHCB3, LHCB3*1 | LHCB3 (LIGHT-HARVESTING CHLOROPHYLL B-BINDING PROTEIN 3); structural molecule | chr5:22038424-22039383 FORWARDhighly similar to ( 504) CB23_HORVU Chlorophyll a-b binding protein of LHCII type III, chloroplast precursor (CAB) - Hordeum vulgare (Barley)moderately similar to ( 494) loc_os07g37550 12007.m079717 protein chlorophyll a-b…	Energy metabolism	4.70963	3.38291	2.7104e-06	3.75103e-06	0.00577043	0.00644689	0.206058	0.755247
XIC	b20.a2	GRMZM2G162282_P01	Zm00001d048592	highly similar to ( 700) AT2G39730 | Symbols: RCA | RCA (RUBISCO ACTIVASE); ADP binding / ATP binding / enzyme regulator/ ribulose-1,5-bisphosphate carboxylase/oxygenase activator | chr2:16571174-16573345 REVERSEhighly similar to ( 701) RCA_ORYSA Ribulose bisphosphate carboxylase/oxygenase activase, chloroplast precursor (RuBisCO activase) (RA) - Oryza sativa (Rice)highly similar to ( 701) loc_os…	Energy metabolism	4.67597	17.0241	0	0	0	0	0.0156009	0.327039
SC	c372.a1	AC216353.2_FGP005	NA	weakly similar to ( 116) AT5G09650 | Symbols: AtPPa6 | AtPPa6 (Arabidopsis thaliana pyrophosphorylase 6); inorganic diphosphatase/ pyrophosphatase | chr5:2991331-2993117 REVERSEweakly similar to ( 128) loc_os02g52940 12002.m100369 protein inorganic pyrophosphatase, putative, expressed seq=cds; coord=5:210593958..210594236:-1; parent_gene=AC216353.2_FG005	Nucleotide metabolism	4.66701	3.13046	0.232192	0.27219	0.393163	0.514392	0.190251	0.994451
XIC	d1251.a1	GRMZM2G108849_P02*	Zm00001d021615	moderately similar to ( 319) AT1G02305 | Symbols: | cathepsin B-like cysteine protease, putative | chr1:455816-457974 FORWARDmoderately similar to ( 371) loc_os05g24550 12005.m083685 protein cathepsin B-like cysteine proteinase 3 precursor, putative, expressed seq=cds; coord=7:152772009..152776227:1; parent_gene=GRMZM2G108849	Folding, sorting and degradation	4.66586	3.64431	0	0	0	0	0.000540467	0.0453119
XIC	d1453.a1	AC196475.3_FGP004	NA	moderately similar to ( 405) AT5G54160 | Symbols: ATOMT1, OMT1 | ATOMT1 (O-METHYLTRANSFERASE 1); caffeate O-methyltransferase/ myricetin 3-O-methyltransferase/ quercetin 3-O-methyltransferase | chr5:21982075-21984167 FORWARDhighly similar to ( 661) COMT1_MAIZE Caffeic acid 3-O-methyltransferase (EC 2.1.1.68) (S-adenosysl-L-methionine:caffeic acid 3-O-methyltransferase) (COMT) (CAOMT) - Zea mays (…	Biosynthesis of other secondary metabolites	4.63758	9.02193	0	0	0	0	0.0522432	0.519883
XIC	c882.a1	GRMZM5G848696_P01*	Zm00001d044267	moderately similar to ( 424) AT1G17650 | Symbols: GLYR2, GR2 | GLYR2 (GLYOXYLATE REDUCTASE 2); glyoxylate reductase (NADP)/ phosphogluconate dehydrogenase (decarboxylating) | chr1:6069594-6071964 REVERSEmoderately similar to ( 491) loc_os01g39270 12001.m10205 protein 2-hydroxy-3-oxopropionate reductase, putative, expressed seq=cds; coord=3:219696465..219699371:-1; parent_gene=GRMZM5G848696	Carbohydrate metabolism	4.52199	8.26754	0.732975	0.747231	0	0	0.999828	1
XIC	c797.a1	GRMZM2G007151_P01*	Zm00001d009010	very weakly similar to (81.3) AT4G20260 | Symbols: ATPCAP1, PCAP1 | DREPP plasma membrane polypeptide family protein | chr4:10941593-10943227 FORWARDweakly similar to ( 145) SRS1_ORYSA Salt-stress root protein RS1 - Oryza sativa (Rice)weakly similar to ( 145) loc_os01g13210 12001.m42933 protein DREPP4 protein, putative, expressed seq=cds; coord=8:29145636..29147578:-1; parent_gene=GRMZM2G007151	Folding, sorting and degradation	4.50341	8.70655	1.11022e-16	2.02708e-16	0	0	7.4778e-06	0.00436551
XIC	c242.a1	GRMZM5G856777_P01	NA	highly similar to ( 847) ATCG00280 | Symbols: PSBC | chloroplast gene encoding a CP43 subunit of the photosystem II reaction center. promoter contains a blue-light responsive element. | chrC:33720-35141 FORWARDhighly similar to ( 886) PSBC_MAIZE Photosystem II 44 kDa reaction center protein (P6 protein) (CP43) - Zea mays (Maize)highly similar to ( 868) loc_osp1g00180 11562.m00007 protein photosys…	Energy metabolism	4.49954	2.24272	0.00688071	0.00820468	0.0906899	0.0949941	0.549349	0.959053
XIC	c645.a1	GRMZM5G843748_P02	Zm00001d020808	moderately similar to ( 405) AT2G22420 | Symbols: | peroxidase 17 (PER17) (P17) | chr2:9513341-9514484 FORWARDmoderately similar to ( 231) PERX_TOBAC Lignin-forming anionic peroxidase precursor (EC 1.11.1.7) (TOPA) - Nicotiana tabacum (Common tobacco)moderately similar to ( 495) loc_os09g29490 12009.m06100 protein peroxidase 17 precursor, putative, expressed seq=cds; coord=7:129358205..129362749:…	Carbohydrate metabolism	4.37501	3.36287	4.44089e-16	7.95818e-16	6.66134e-16	1.30937e-15	0.163681	0.718086
XIC	d1030.a1	GRMZM2G097900_P01	Zm00001d008573	weakly similar to ( 106) AT5G37770 | Symbols: TCH2, CML24 | TCH2 (TOUCH 2); calcium ion binding | chr5:14999075-14999560 REVERSEweakly similar to ( 188) loc_os01g04330 12001.m07068 protein calmodulin-related protein 2, touch-induced, putative, expressed seq=cds; coord=8:12989704..12991151:-1; parent_gene=GRMZM2G097900	Signal transduction	4.33229	3.66088	0	0	0	0	0.000555293	0.0453119
SC	b81.a1	GRMZM2G096792_P01	NA	weakly similar to ( 167) ATCG01060 | Symbols: PSAC | Encodes the PsaC subunit of photosystem I. | chrC:117318-117563 REVERSEweakly similar to ( 175) PSAC_WHEAT Photosystem I iron-sulfur center (Photosystem I subunit VII) (9 kDa polypeptide) (PSI-C) (PsaC) - Triticum aestivum (Wheat)weakly similar to ( 177) loc_osp1g00920 11562.m00083 protein photosystem I subunit VII seq=cds; coord=2:172082867..1…	Energy metabolism	4.31872	2.27547	0	0	0.979707	0.990694	0.999321	1
XIC	b47.a2	GRMZM2G128877_P02	Zm00001d015426	nearly identical (1139) AT1G78900 | Symbols: VHA-A | VHA-A (VACUOLAR ATP SYNTHASE SUBUNIT A); ATP binding / hydrogen ion transporting ATP synthase, rotational mechanism / hydrolase, acting on acid anhydrides, catalyzing transmembrane movement of substances / proton-transporting ATPase, rotational mechanism | chr1:29660463-29664575 FORWARDnearly identical (1165) VATA_DAUCA Vacuolar ATP synthase ca…	Membrane transport	4.31331	2.54648	0	0	6.62427e-09	9.60062e-09	0.375621	0.887524
SC	c232.a2	GRMZM2G416120_P01	Zm00001d032789	highly similar to ( 922) AT3G23990 | Symbols: HSP60, HSP60-3B | HSP60 (HEAT SHOCK PROTEIN 60); ATP binding | chr3:8669013-8672278 FORWARDnearly identical (1019) CH62_MAIZE Chaperonin CPN60-2, mitochondrial precursor (HSP60-2) - Zea mays (Maize)highly similar to ( 982) loc_os10g32550 12010.m06092 protein chaperonin CPN60-1, mitochondrial precursor, putative, expressed seq=cds; coord=1:234775005..2…	Folding, sorting and degradation	4.22725	3.26026	1.68558e-08	4.42671e-08	0.392355	0.514392	0.357277	1
XIC	c668.a1	GRMZM2G036427_P01	Zm00001d023830	moderately similar to ( 209) AT2G47710 | Symbols: | universal stress protein (USP) family protein | chr2:19555045-19555956 REVERSEmoderately similar to ( 275) loc_os12g36640 12012.m07450 protein fiber protein Fb19, putative, expressed seq=cds; coord=10:23213183..23215664:1; parent_gene=GRMZM2G036427	Folding, sorting and degradation	4.20506	5.86243	0	0	0.000128148	0.000152951	0.999994	1
SC	c375.a2	AC217300.3_FGP005	Zm00001d028702	moderately similar to ( 266) AT5G13510 | Symbols: | ribosomal protein L10 family protein | chr5:4341294-4341956 FORWARDmoderately similar to ( 281) RK10_TOBAC 50S ribosomal protein L10, chloroplast precursor (CL10) - Nicotiana tabacum (Common tobacco)moderately similar to ( 349) loc_os03g17580 12003.m07183 protein 50S ribosomal protein L10, putative, expressed seq=cds; coord=1:43420855..43421523:…	Translation	4.18967	2.73155	1.96506e-08	5.13574e-08	0.988697	0.993403	0.979084	1
SC	c416.a1	GRMZM2G031545_P01*	Zm00001d022134	moderately similar to ( 256) AT1G30230 | Symbols: | elongation factor 1-beta / EF-1-beta | chr1:10639286-10640601 FORWARDmoderately similar to ( 288) EF1D1_ORYSA Elongation factor 1-delta 1 (EF-1-delta 1) (Elongation factor 1B-beta 1) (eEF-1B beta 1) - Oryza sativa (Rice)moderately similar to ( 294) loc_os07g42300 12007.m08465 protein elongation factor 1-delta 1, putative, expressed seq=cds; coor…	Translation	4.16254	3.46216	1.25249e-05	2.52363e-05	0.273499	0.403718	0.820057	1
XIC	c674.a1	GRMZM2G085854_P01	Zm00001d048711	moderately similar to ( 432) AT1G01420 | Symbols: UGT72B3 | UGT72B3 (UDP-GLUCOSYL TRANSFERASE 72B3); UDP-glycosyltransferase/ quercetin 3-O-glucosyltransferase/ transferase, transferring glycosyl groups | chr1:154566-156011 REVERSEweakly similar to ( 163) ZOX_PHAVU Zeatin O-xylosyltransferase (EC 2.4.2.40) (Zeatin O-beta-D-xylosyltransferase) - Phaseolus vulgaris (Kidney bean) (French bean)highly…	Carbohydrate metabolism	4.15626	4.76732	0	0	0	0	0.0831246	0.58552
XIC	c230.a1	GRMZM2G034152_P01	Zm00001d024281	moderately similar to ( 429) AT5G13700 | Symbols: ATPAO1, APAO, PAO1 | ATPAO1 (ARABIDOPSIS THALIANA POLYAMINE OXIDASE 1); FAD binding / polyamine oxidase | chr5:4420222-4422974 REVERSEhighly similar to ( 987) PAO_MAIZE Polyamine oxidase precursor (EC 1.5.3.11) - Zea mays (Maize)highly similar to ( 775) loc_os09g20284 12009.m05235 protein polyamine oxidase precursor, putative, expressed seq=cds; c…	AminoAcid metabolism	4.13778	11.9883	0	0	0	0	0.0967574	0.60424
SC	c375.a1	GRMZM2G030203_P01	Zm00001d047760	moderately similar to ( 263) AT5G13510 | Symbols: | ribosomal protein L10 family protein | chr5:4341294-4341956 FORWARDmoderately similar to ( 280) RK10_TOBAC 50S ribosomal protein L10, chloroplast precursor (CL10) - Nicotiana tabacum (Common tobacco)moderately similar to ( 349) loc_os03g17580 12003.m07183 protein 50S ribosomal protein L10, putative, expressed seq=cds; coord=9:138556066..13855701…	Translation	4.12366	2.45551	6.04911e-09	1.64451e-08	0.98706	0.993403	0.978058	1
XIC	a4.a1	GRMZM2G360821_P01*	Zm00001d000279	highly similar to ( 877) ATCG00490 | Symbols: RBCL | large subunit of RUBISCO. Protein is tyrosine-phosphorylated and its phosphorylation state is modulated in response to ABA in Arabidopsis thaliana seeds. | chrC:54958-56397 FORWARDhighly similar to ( 944) RBL_MAIZE Ribulose bisphosphate carboxylase large chain precursor (EC 4.1.1.39) (RuBisCO large subunit) - Zea mays (Maize)highly similar to (…	Energy metabolism	4.10908	3.74405	0	0	0.0149373	0.0163259	0.248951	0.779325
XIC	d1300.a1	GRMZM2G450125_P01	Zm00001d027619	highly similar to ( 678) AT3G23920 | Symbols: BAM1, BMY7, TR-BAMY | BAM1 (BETA-AMYLASE 1); beta-amylase | chr3:8641722-8644199 FORWARDmoderately similar to ( 434) AMYB_SOYBN Beta-amylase (EC 3.2.1.2) (1,4-alpha-D-glucan maltohydrolase) - Glycine max (Soybean)highly similar to ( 850) loc_os03g04770 12003.m06004 protein beta-amylase, putative, expressed seq=cds; coord=1:9057041..9060022:1; parent_g…	Carbohydrate metabolism	4.09971	5.14197	0	0	0	0	0.0606737	0.539351
SC	b81.a2	GRMZM5G815553_P01	NA	weakly similar to ( 166) ATCG01060 | Symbols: PSAC | Encodes the PsaC subunit of photosystem I. | chrC:117318-117563 REVERSEweakly similar to ( 176) PSAC_MAIZE Photosystem I iron-sulfur center (Photosystem I subunit VII) (9 kDa polypeptide) (PSI-C) (PsaC) - Zea mays (Maize)weakly similar to ( 175) loc_osp1g00920 11562.m00083 protein photosystem I subunit VII seq=cds; coord=Pt:111760..112005:-1; p…	Energy metabolism	4.09865	2.12171	0	0	0.880786	0.917238	0.950057	1
XIC	c155.a1	GRMZM2G429000_P01	Zm00001d026160	weakly similar to ( 116) AT2G45180 | Symbols: | protease inhibitor/seed storage/lipid transfer protein (LTP) family protein | chr2:18626377-18626781 FORWARDweakly similar to ( 108) 14KD_DAUCA 14 kDa proline-rich protein DC2.15 precursor - Daucus carota (Carrot)weakly similar to ( 150) loc_os04g46830 12004.m101609 protein cortical cell-delineating protein precursor, putative, expressed seq=cds; co…	misc	4.09313	4.35508	0	0	3.66262e-07	4.91737e-07	0.242975	0.779325
XIC	c420.a1	AC147602.5_FGP004	NA	weakly similar to ( 181) AT3G55800 | Symbols: SBPASE | SBPASE (sedoheptulose-bisphosphatase); phosphoric ester hydrolase/ sedoheptulose-bisphosphatase | chr3:20709640-20711421 FORWARDmoderately similar to ( 253) S17P_WHEAT Sedoheptulose-1,7-bisphosphatase, chloroplast precursor (EC 3.1.3.37) (Sedoheptulose-bisphosphatase) (SBPase) (SED(1,7)P2ase) - Triticum aestivum (Wheat)moderately similar to (…	Energy metabolism	4.07021	2.85871	0	0	7.43057e-06	9.34766e-06	0.081129	0.58552
XIC	c927.a1	GRMZM2G045664_P01	Zm00001d009700	weakly similar to ( 191) AT2G46140 | Symbols: | late embryogenesis abundant protein, putative / LEA protein, putative | chr2:18959163-18960362 FORWARDmoderately similar to ( 202) LEA14_GOSHI Late embryogenesis abundant protein Lea14-A - Gossypium hirsutum (Upland cotton)moderately similar to ( 274) loc_os05g50710 12005.m09138 protein late embryogenesis abundant protein Lea14-A, putative, expresse…	Signaling molecules and interactions	4.06567	2.74545	0	0	2.22045e-16	4.40587e-16	0.0091948	0.239456
SC	c115.a3	GRMZM2G370470_P01	NA	NA	NA	4.04558	3.48774	5.032e-07	1.16338e-06	0.847581	0.89822	0.623799	1
XIC	c981.a1	GRMZM2G029583_P01*	Zm00001d017117	highly similar to ( 634) AT4G24820 | Symbols: | 26S proteasome regulatory subunit, putative (RPN7) | chr4:12790471-12792599 REVERSEhighly similar to ( 712) PSMD6_ORYSA 26S proteasome non-ATPase regulatory subunit 6 (26S proteasome regulatory particle non-ATPase subunit 7) (OsRPN7) - Oryza sativa (Rice)highly similar to ( 712) loc_os04g40850 12004.m35346 protein 26S proteasome non-ATPase regulator…	Folding, sorting and degradation	4.02553	3.74646	0.016848	0.0196066	0.000398427	0.000467122	0.711949	1
XIC	c984.a1	GRMZM2G155384_P02	Zm00001d053881	nearly identical (1146) AT2G20580 | Symbols: RPN1A, ATRPN1A | RPN1A (26S PROTEASOME REGULATORY SUBUNIT S2 1A); binding / enzyme regulator | chr2:8859211-8864699 FORWARDnearly identical (1364) loc_os02g05340 12002.m05882 protein 26S proteasome regulatory subunit rpn1, putative, expressed seq=cds; coord=4:237610321..237618962:-1; parent_gene=GRMZM2G155384	Folding, sorting and degradation	4.00851	1.7299	0	0	0.686076	0.692128	0.891273	1
SC	c400.a2	GRMZM2G030167_P01	Zm00001d011504	moderately similar to ( 305) AT1G64200 | Symbols: VHA-E3 | VHA-E3 (VACUOLAR H+-ATPASE SUBUNIT E ISOFORM 3); proton-transporting ATPase, rotational mechanism | chr1:23828537-23830002 REVERSEmoderately similar to ( 328) VATE_GOSHI Vacuolar ATP synthase subunit E (EC 3.6.3.14) (V-ATPase E subunit) (Vacuolar proton pump E subunit) - Gossypium hirsutum (Upland cotton)moderately similar to ( 372) loc_o…	Membrane transport	4.00689	3.12361	2.91639e-08	7.54913e-08	0.863389	0.906977	0.944403	1
XIC	c932.a1	GRMZM2G130034_P01	Zm00001d030967	highly similar to ( 629) AT5G43600 | Symbols: ATAAH-2, UAH | UAH (UREIDOGLYCOLATE AMIDOHYDROLASE); allantoate deiminase/ metallopeptidase | chr5:17512651-17515280 FORWARDhighly similar to ( 733) loc_os12g40550 12012.m26959 protein N-carbamoyl-L-amino acid hydrolase, putative, expressed seq=cds; coord=1:167851430..167863929:-1; parent_gene=GRMZM2G130034	Folding, sorting and degradation	3.98855	4.69021	0	0	0	0	0.182394	0.749161
SC	c145.a2	GRMZM2G140614_P01*	Zm00001d020771	highly similar to ( 876) AT4G24620 | Symbols: PGI1, PGI | PGI1 (PHOSPHOGLUCOSE ISOMERASE 1); glucose-6-phosphate isomerase | chr4:12709097-12712610 REVERSEweakly similar to ( 124) G6PI_SPIOL Glucose-6-phosphate isomerase, cytosolic (EC 5.3.1.9) (GPI) (Phosphoglucose isomerase) (PGI) (Phosphohexose isomerase) (PHI) - Spinacia oleracea (Spinach)nearly identical (1012) loc_os09g29070 12009.m22122 pr…	Carbohydrate metabolism	3.96857	2.80011	0.841881	0.865067	0.00383957	0.0139233	0.622195	1
XIC	c288.a1	GRMZM5G859979_P01	NA	NA	NA	3.9563	2.4623	0.200976	0.216648	0.216117	0.223214	0.731253	1
XIC	c576.a1	GRMZM2G133121_P01	Zm00001d039422	highly similar to ( 763) AT2G37690 | Symbols: | phosphoribosylaminoimidazole carboxylase, putative / AIR carboxylase, putative | chr2:15806111-15810240 FORWARDhighly similar to ( 909) loc_os01g10280 12001.m150504 protein phosphoribosylaminoimidazole carboxylase, chloroplast precursor, putative, expressed seq=cds; coord=3:4635480..4641804:1; parent_gene=GRMZM2G133121	Nucleotide metabolism	3.95063	3.05144	0	0	0.0071271	0.00789947	0.999544	1
SC	b72.a4	GRMZM2G068455_P01*	Zm00001d050409	highly similar to ( 528) AT3G47520 | Symbols: MDH | MDH (MALATE DEHYDROGENASE); L-malate dehydrogenase/ binding / catalytic/ malate dehydrogenase/ oxidoreductase/ oxidoreductase, acting on the CH-OH group of donors, NAD or NADP as acceptor | chr3:17513657-17514868 FORWARDmoderately similar to ( 390) MDHG_ORYSA Malate dehydrogenase, glyoxysomal precursor (EC 1.1.1.37) - Oryza sativa (Rice)highly s…	Carbohydrate metabolism	3.91348	2.03391	2.92993e-05	5.63087e-05	0.697775	0.77974	0.815454	1
XIC	a9.a2	AC207722.2_FGP009	Zm00001d021435	moderately similar to ( 452) AT2G34420 | Symbols: LHB1B2, LHCB1.5 | LHB1B2; chlorophyll binding | chr2:14522716-14523513 REVERSEhighly similar to ( 512) CB21_MAIZE Chlorophyll a-b binding protein 1, chloroplast precursor (LHCII type I CAB-1) (LHCP) - Zea mays (Maize)moderately similar to ( 476) loc_os01g41710 12001.m42672 protein chlorophyll a-b binding protein 2, chloroplast precursor, putative,…	Energy metabolism	3.90924	3.09877	0.0947685	0.10467	6.0398e-07	8.0064e-07	0.293921	0.828263
SC	c261.a2	GRMZM2G076006_P03	Zm00001d037775	highly similar to ( 510) AT1G67280 | Symbols: | lactoylglutathione lyase, putative / glyoxalase I, putative | chr1:25188563-25190134 REVERSEmoderately similar to ( 421) LGUL_ORYSA Lactoylglutathione lyase (EC 4.4.1.5) (Methylglyoxalase) (Aldoketomutase) (Glyoxalase I) (Glx I) (Ketone-aldehyde mutase) (S-D-lactoylglutathione methylglyoxal lyase) (Allergen Ory s ?) (Allergen Glb33) (PP33) - Oryza s…	Xenobiotics degradation and metabolism	3.90371	2.77168	0.758605	0.788483	0.412816	0.529226	0.968104	1
SC	c289.a1	GRMZM2G059991_P01	Zm00001d037859	moderately similar to ( 344) AT3G10920 | Symbols: MSD1 | MSD1 (MANGANESE SUPEROXIDE DISMUTASE 1); metal ion binding / superoxide dismutase | chr3:3418015-3419581 FORWARDmoderately similar to ( 438) SODM1_MAIZE Superoxide dismutase [Mn] 3.1, mitochondrial precursor (EC 1.15.1.1) - Zea mays (Maize)moderately similar to ( 398) loc_os05g25850 12005.m083692 protein superoxide dismutase, mitochondrial …	Folding, sorting and degradation	3.89625	3.69269	0.00173259	0.0027528	0.14254	0.250674	0.818375	1
XIC	c578.a1	GRMZM2G134738_P01	Zm00001d011330	weakly similar to ( 154) AT3G15640 | Symbols: | cytochrome c oxidase family protein | chr3:5299273-5301371 FORWARDmoderately similar to ( 211) loc_os01g42650 12001.m10529 protein cytochrome c oxidase polypeptide Vb, mitochondrial precursor, putative, expressed seq=cds; coord=8:142871869..142875661:-1; parent_gene=GRMZM2G134738	Energy metabolism	3.8927	2.18182	0.000243087	0.000312363	0.640386	0.646553	0.702772	1
XIC	b39.a3	GRMZM5G828630_P01	Zm00001d030557	weakly similar to ( 108) AT1G72330 | Symbols: ALAAT2 | ALAAT2 (ALANINE AMINOTRANSFERASE 2); ATP binding / L-alanine:2-oxoglutarate aminotransferase | chr1:27233637-27236191 FORWARDweakly similar to ( 144) ALA2_HORVU Alanine aminotransferase 2 (EC 2.6.1.2) (GPT) (Glutamic--pyruvic transaminase 2) (Glutamic--alanine transaminase 2) (ALAAT-2) - Hordeum vulgare (Barley)weakly similar to ( 153) loc_os…	AminoAcid metabolism	3.75561	3.7504	0	0	0	0	0.0733041	0.564277
XIC	c946.a1	GRMZM2G072909_P01	Zm00001d046135	moderately similar to ( 488) AT1G53280 | Symbols: | DJ-1 family protein | chr1:19864942-19867341 REVERSEhighly similar to ( 658) loc_os06g34040 12006.m07940 protein 4-methyl-5-thiazole monophosphate biosynthesis protein, putative, expressed seq=cds; coord=9:64132094..64145762:1; parent_gene=GRMZM2G072909	notassigned	3.71321	2.63595	0.302129	0.320471	0.00255176	0.00288161	0.392462	0.908077
SC	a2.b10	GRMZM2G109613_P01	NA	NA	NA	3.70793	2.77363	2.84088e-07	6.68278e-07	0.0302498	0.0743621	0.330356	1
XIC	d1368.a2	GRMZM2G168330_P02	Zm00001d021445	moderately similar to ( 214) AT2G20450 | Symbols: | 60S ribosomal protein L14 (RPL14A) | chr2:8813923-8815071 FORWARDmoderately similar to ( 215) RL14_PEA Probable 60 ribosomal protein L14 (Hydroxyproline-rich glycoprotein HRGP1) - Pisum sativum (Garden pea)moderately similar to ( 250) loc_os02g40880 12002.m100284 protein 60 ribosomal protein L14, putative, expressed seq=cds; coord=7:147132517..1…	Translation	3.69728	2.40363	0	0	1.11022e-16	2.24905e-16	0.0896159	0.59218
XIC	d1201.a1	GRMZM2G123896_P04	Zm00001d032423	weakly similar to ( 117) AT2G33830 | Symbols: | dormancy/auxin associated family protein | chr2:14309768-14310286 REVERSEweakly similar to ( 110) 12KD_FRAAN Auxin-repressed 12.5 kDa protein - Fragaria ananassa (Strawberry)weakly similar to ( 166) loc_os11g44810 12011.m28867 protein auxin-repressed 12.5 kDa protein, putative, expressed seq=cds; coord=1:222591008..222592434:1; parent_gene=GRMZM2G12…	Signaling molecules and interactions	3.69669	5.32671	0	0	0	0	0.668497	1
XIC	d1081.a1	GRMZM2G381051_P01*	Zm00001d035475	highly similar to ( 617) AT3G45300 | Symbols: IVD, ATIVD | IVD (ISOVALERYL-COA-DEHYDROGENASE); ATP binding / isovaleryl-CoA dehydrogenase | chr3:16621659-16624848 REVERSEhighly similar to ( 609) IVD2_SOLTU Isovaleryl-CoA dehydrogenase 2, mitochondrial precursor (EC 1.3.99.10) (IVD 2) (Fragment) - Solanum tuberosum (Potato)highly similar to ( 670) loc_os05g03480 12005.m083606 protein isovaleryl-Co…	AminoAcid metabolism	3.69227	2.4922	0	0	0	0	0.648635	0.997698
XIC	b30.a3	GRMZM2G408768_P01	Zm00001d007446	moderately similar to ( 387) AT1G78300 | Symbols: GRF2, 14-3-3OMEGA, GF14 OMEGA | GRF2 (GENERAL REGULATORY FACTOR 2); protein binding / protein phosphorylated amino acid binding | chr1:29461883-29463052 FORWARDmoderately similar to ( 442) 14334_ORYSA 14-3-3-like protein GF14-D (G-box factor 14-3-3 homolog D) - Oryza sativa (Rice)moderately similar to ( 442) loc_os11g34450 12011.m07303 protein 14-…	Signal transduction	3.6345	3.62228	0	0	8.89497e-08	1.23237e-07	0.534671	0.95646
XIC	c509.a1	GRMZM2G047513_P01	Zm00001d028153	moderately similar to ( 204) AT3G13120 | Symbols: | 30S ribosomal protein S10, chloroplast, putative | chr3:4220310-4221526 REVERSEmoderately similar to ( 203) RR10_MESCR 30S ribosomal protein S10, chloroplast precursor - Mesembryanthemum crystallinum (Common ice plant)moderately similar to ( 252) loc_os03g10060 12003.m06460 protein chloroplast 30S ribosomal protein S10, putative, expressed seq=c…	Translation	3.6229	2.69871	0	0	0.029351	0.0314779	0.111629	0.616007
SC	c289.a2	GRMZM2G124455_P01	Zm00001d009990	moderately similar to ( 343) AT3G10920 | Symbols: MSD1 | MSD1 (MANGANESE SUPEROXIDE DISMUTASE 1); metal ion binding / superoxide dismutase | chr3:3418015-3419581 FORWARDmoderately similar to ( 438) SODM4_MAIZE Superoxide dismutase [Mn] 3.4, mitochondrial precursor (EC 1.15.1.1) - Zea mays (Maize)moderately similar to ( 404) loc_os05g25850 12005.m083692 protein superoxide dismutase, mitochondrial …	Folding, sorting and degradation	3.6101	3.23968	0.00147256	0.002371	0.244231	0.368561	0.876899	1
XIC	d1050.a3	GRMZM2G103287_P01*	Zm00001d024408	moderately similar to ( 469) AT5G57330 | Symbols: | aldose 1-epimerase family protein | chr5:23218392-23220664 FORWARDhighly similar to ( 552) loc_os08g14330 12008.m26633 protein apospory-associated protein C, putative, expressed seq=cds; coord=10:70222569..70228198:-1; parent_gene=GRMZM2G103287	Carbohydrate metabolism	3.6006	3.13412	0	0	0.0336572	0.0360346	0.999858	1
SC	a8.a4	GRMZM5G886257_P01	Zm00001d037693	highly similar to ( 869) AT5G11670 | Symbols: ATNADP-ME2 | ATNADP-ME2 (NADP-malic enzyme 2); malate dehydrogenase (oxaloacetate-decarboxylating) (NADP+)/ malic enzyme/ oxidoreductase, acting on NADH or NADPH, NAD or NADP as acceptor | chr5:3754456-3758040 FORWARDhighly similar to ( 902) MAOC_ORYSA NADP-dependent malic enzyme, chloroplast precursor (EC 1.1.1.40) (NADP-ME) - Oryza sativa (Rice)high…	Energy metabolism	3.57292	2.60328	0	0	0.425432	0.540278	0.990312	1
XIC	b39.a1	GRMZM2G088064_P03	Zm00001d014258	highly similar to ( 713) AT1G17290 | Symbols: AlaAT1 | AlaAT1 (ALANINE AMINOTRANSFERAS); ATP binding / L-alanine:2-oxoglutarate aminotransferase | chr1:5922771-5926093 FORWARDhighly similar to ( 825) ALA2_HORVU Alanine aminotransferase 2 (EC 2.6.1.2) (GPT) (Glutamic--pyruvic transaminase 2) (Glutamic--alanine transaminase 2) (ALAAT-2) - Hordeum vulgare (Barley)highly similar to ( 832) loc_os10g25…	AminoAcid metabolism	3.57275	4.1356	0	0	0	0	0.227859	0.767146
SC	c238.a2	GRMZM2G111756_P01	Zm00001d051203	moderately similar to ( 268) AT5G23140 | Symbols: CLPP2, NCLPP7 | NCLPP7 (NUCLEAR-ENCODED CLP PROTEASE P7); serine-type endopeptidase | chr5:7783811-7784826 FORWARDweakly similar to ( 151) CLPP_CHLVU ATP-dependent Clp protease proteolytic subunit (EC 3.4.21.92) (Endopeptidase Clp) - Chlorella vulgaris (Green alga)moderately similar to ( 360) loc_os02g42290 12002.m33788 protein ATP-dependent Clp p…	Folding, sorting and degradation	3.56957	2.2452	9.34685e-10	2.75567e-09	0.338854	0.464125	0.842091	1
SC	c117.a2	GRMZM2G354804_P02*	NA	moderately similar to ( 270) ATCG01110 | Symbols: NDHH | Encodes the 49KDa plastid NAD(P)H dehydrogenase subunit H protein. Its transcription is regulated by an ndhF-specific plastid sigma factor, SIG4. | chrC:122011-123192 REVERSEmoderately similar to ( 318) NDHH_SACOF NAD(P)H-quinone oxidoreductase chain H, chloroplast (EC 1.6.5.-) (NAD(P)H dehydrogenase, chain H) (NADH-plastoquinone oxidoreduc…	Energy metabolism	3.56695	3.10867	8.99281e-15	3.97152e-14	0.0248564	0.0649628	0.947783	1
XIC	c264.a1	GRMZM2G061969_P01	Zm00001d008727	nearly identical (1347) AT3G15730 | Symbols: PLDALPHA1, PLD | PLDALPHA1 (PHOSPHOLIPASE D ALPHA 1); phospholipase D | chr3:5330835-5333474 FORWARDnearly identical (1625) PLDA1_MAIZE Phospholipase D alpha 1 (EC 3.1.4.4) (PLD alpha 1) (Choline phosphatase 1) (Phosphatidylcholine-hydrolyzing phospholipase D 1) - Zea mays (Maize)nearly identical (1545) loc_os01g07760 12001.m42610 protein phospholipase…	Lipid metabolism	3.56368	2.64445	0	0	0	0	0.135664	0.651188
XIC	b39.a2	GRMZM2G703753_P01	NA	NA	NA	3.54943	3.96128	0	0	0	0	0.11148	0.616007
XIC	c431.a1	GRMZM2G043162_P01	Zm00001d049732	weakly similar to ( 148) AT1G10960 | Symbols: ATFD1 | ATFD1 (FERREDOXIN 1); 2 iron, 2 sulfur cluster binding / electron carrier/ iron-sulfur cluster binding | chr1:3664445-3664891 FORWARDweakly similar to ( 160) FER5_MAIZE Ferredoxin-5, chloroplast precursor (Ferredoxin V) (Fd V) - Zea mays (Maize)weakly similar to ( 157) loc_os08g01380 12008.m080056 protein ferredoxin-1, chloroplast precursor, p…	Energy metabolism	3.51733	5.67564	0	0	0	0	0.140122	0.667354
XIC	c236.a1	GRMZM2G130230_P01*	Zm00001d003252	highly similar to ( 775) AT5G40760 | Symbols: G6PD6 | G6PD6 (GLUCOSE-6-PHOSPHATE DEHYDROGENASE 6); glucose-6-phosphate dehydrogenase | chr5:16311284-16314556 FORWARDhighly similar to ( 788) G6PD_SOLTU Glucose-6-phosphate 1-dehydrogenase, cytoplasmic isoform (EC 1.1.1.49) (G6PD) - Solanum tuberosum (Potato)highly similar to ( 865) loc_os02g38840 12002.m77828 protein glucose-6-phosphate 1-dehydroge…	Carbohydrate metabolism	3.51046	3.14162	0	0	0	0	0.672296	1
XIC	c555.a1	GRMZM2G018074_P01	Zm00001d018959	highly similar to ( 786) AT3G54540 | Symbols: ATGCN4 | ATGCN4; transporter | chr3:20190393-20192564 FORWARDhighly similar to ( 935) loc_os03g32630 12003.m08505 protein ATP-binding cassette sub-family F member 1, putative, expressed seq=cds; coord=7:10365682..10368158:1; parent_gene=GRMZM2G018074	Membrane transport	3.50835	2.25239	9.22819e-08	1.33745e-07	4.84501e-13	8.56043e-13	0.543061	0.95646
XIC	c510.a1	GRMZM2G010973_P01	Zm00001d017621	weakly similar to ( 171) loc_os02g45880 12002.m09625 protein expressed protein seq=cds; coord=5:196797478..196798567:1; parent_gene=GRMZM2G010973	notassigned	3.48253	3.59095	0	0	0.370739	0.37887	0.996478	1
SC	a8.a5	GRMZM2G404237_P01	Zm00001d010358	highly similar to ( 858) AT5G11670 | Symbols: ATNADP-ME2 | ATNADP-ME2 (NADP-malic enzyme 2); malate dehydrogenase (oxaloacetate-decarboxylating) (NADP+)/ malic enzyme/ oxidoreductase, acting on NADH or NADPH, NAD or NADP as acceptor | chr5:3754456-3758040 FORWARDhighly similar to ( 888) MAOC_ORYSA NADP-dependent malic enzyme, chloroplast precursor (EC 1.1.1.40) (NADP-ME) - Oryza sativa (Rice)high…	Energy metabolism	3.45684	2.48971	0	0	0.701751	0.781167	0.992996	1
SC	c104.a2	GRMZM5G829778_P01	Zm00001d039079	highly similar to ( 751) AT1G65930 | Symbols: | isocitrate dehydrogenase, putative / NADP+ isocitrate dehydrogenase, putative | chr1:24539088-24541861 FORWARDhighly similar to ( 749) IDHP_MEDSA Isocitrate dehydrogenase [NADP], chloroplast precursor (EC 1.1.1.42) (Oxalosuccinate decarboxylase) (IDH) (NADP(+)-specific ICDH) (IDP) (Fragment) - Medicago sativa (Alfalfa)highly similar to ( 801) loc_os…	Carbohydrate metabolism	3.44403	2.27527	0	0	0.0204952	0.0559994	0.104893	0.807325
XIC	c620.a4	GRMZM2G096269_P01	Zm00001d027540	weakly similar to ( 153) AT2G47730 | Symbols: ATGSTF8, ATGSTF5, GST6, GSTF8 | ATGSTF8 (ARABIDOPSIS THALIANA GLUTATHIONE S-TRANSFERASE PHI 8); glutathione binding / glutathione transferase | chr2:19558213-19559266 FORWARDweakly similar to ( 134) GSTF1_TOBAC Glutathione S-transferase PARB (EC 2.5.1.18) (GST class-phi) - Nicotiana tabacum (Common tobacco)moderately similar to ( 381) loc_os03g04240 1…	misc	3.43265	5.7491	0.0177636	0.020596	0	0	0.0839309	0.58552
SC	b33.a5	GRMZM5G833699_P01	Zm00001d024903	nearly identical (1063) AT5G52640 | Symbols: HSP81-1, ATHS83, HSP81.1, HSP83, ATHSP90.1 | ATHSP90.1 (HEAT SHOCK PROTEIN 90.1); ATP binding / unfolded protein binding | chr5:21352542-21355147 FORWARDnearly identical (1162) HSP82_MAIZE Heat shock protein 82 - Zea mays (Maize)nearly identical (1084) loc_os04g01740 12004.m05490 protein heat shock protein 82, putative, expressed seq=cds; coord=10:9368…	Folding, sorting and degradation	3.41047	2.7339	0.915958	0.927965	0.154817	0.268572	0.67849	1
XIC	c410.a1	GRMZM2G004298_P01*	NA	moderately similar to ( 265) AT1G09560 | Symbols: GLP5 | GLP5 (GERMIN-LIKE PROTEIN 5); manganese ion binding / nutrient reservoir | chr1:3093896-3094639 FORWARDmoderately similar to ( 264) NEC1_NICPL Nectarin-1 precursor (EC 1.15.1.1) (Superoxide dismutase [Mn]) - Nicotiana plumbaginifolia (Leadwort-leaved tobacco)moderately similar to ( 338) loc_os01g18170 12001.m08359 protein rhicadhesin recept…	Folding, sorting and degradation	3.40743	3.05942	7.56995e-07	1.0712e-06	0	0	0.0108121	0.260059
XIC	c517.a1	AC198418.3_FGP005	Zm00001d034721	highly similar to ( 814) AT5G26742 | Symbols: emb1138 | emb1138 (embryo defective 1138); ATP binding / ATP-dependent helicase/ RNA binding / helicase/ nucleic acid binding / zinc ion binding | chr5:9285540-9288871 REVERSEmoderately similar to ( 319) RH7_SPIOL DEAD-box ATP-dependent RNA helicase 7 (EC 3.6.1.-) - Spinacia oleracea (Spinach)highly similar to ( 848) loc_os03g61220 12003.m35496 protei…	Transcription	3.39789	3.34654	0.146292	0.159476	1.32284e-07	1.82071e-07	0.424845	0.928761
XIC	c142.a1	GRMZM2G038519_P01*	Zm00001d006663	moderately similar to ( 390) AT3G61470 | Symbols: LHCA2 | LHCA2; chlorophyll binding | chr3:22745736-22747032 FORWARDmoderately similar to ( 386) CB12_PETHY Chlorophyll a-b binding protein, chloroplast precursor (LHCI type II CAB) - Petunia hybrida (Petunia)moderately similar to ( 405) loc_os07g38960 12007.m29236 protein chlorophyll a-b binding protein, chloroplast precursor, putative, expressed …	Energy metabolism	3.38052	4.96673	0	0	0.271303	0.279067	0.57497	0.970056
XIC	d1527.a1	GRMZM2G128219_P01	Zm00001d050837	moderately similar to ( 213) AT1G47480 | Symbols: | hydrolase | chr1:17417623-17419296 FORWARDvery weakly similar to (82.8) GID1_ORYSA Gibberellin receptor GID1 (EC 3.-.-.-) (Gibberellin-insensitive dwarf protein 1) (Protein GIBBERELLIN INSENSITIVE DWARF1) - Oryza sativa (Rice)moderately similar to ( 431) loc_os02g35940 12002.m08682 protein gibberellin receptor GID1L2, putative, expressed seq=cds…	Xenobiotics degradation and metabolism	3.37209	3.1768	0	0	0	0	0.339912	0.865562
SC	c400.a1	GRMZM2G070360_P01	Zm00001d043991	moderately similar to ( 306) AT1G64200 | Symbols: VHA-E3 | VHA-E3 (VACUOLAR H+-ATPASE SUBUNIT E ISOFORM 3); proton-transporting ATPase, rotational mechanism | chr1:23828537-23830002 REVERSEmoderately similar to ( 328) VATE_GOSHI Vacuolar ATP synthase subunit E (EC 3.6.3.14) (V-ATPase E subunit) (Vacuolar proton pump E subunit) - Gossypium hirsutum (Upland cotton)moderately similar to ( 375) loc_o…	Membrane transport	3.37038	3.03336	0.000429329	0.000725835	0.771136	0.836041	0.418611	1
XIC	c380.a2	GRMZM2G002178_P01*	Zm00001d028282	highly similar to ( 562) AT5G42650 | Symbols: AOS, CYP74A, DDE2 | AOS (ALLENE OXIDE SYNTHASE); allene oxide synthase/ hydro-lyase/ oxygen binding | chr5:17097803-17099359 REVERSEhighly similar to ( 741) C74A2_ORYSA Cytochrome P450 74A2 (EC 4.2.1.92) (Allene oxide synthase 2) (Hydroperoxide dehydrase 2) - Oryza sativa (Rice)highly similar to ( 741) loc_os03g12500 12003.m06700 protein cytochrome P4…	Chemical structure transformation maps	3.36999	6.35537	0.391067	0.408946	0	0	0.437382	0.934154
XIC	c200.a1	GRMZM2G701082_P04*	Zm00001d037239	moderately similar to ( 299) loc_os06g12580 12006.m32024 protein pro-resilin precursor, putative, expressed seq=cds; coord=6:113557759..113560881:-1; parent_gene=GRMZM2G701082	notassigned	3.36757	2.30552	0	0	0	0	0.333348	0.861373
SC	c396.a1	GRMZM2G070422_P01*	Zm00001d049975	moderately similar to ( 462) AT2G05990 | Symbols: MOD1, ENR1 | MOD1 (MOSAIC DEATH 1); enoyl-[acyl-carrier-protein] reductase (NADH)/ enoyl-[acyl-carrier-protein] reductase/ oxidoreductase | chr2:2322876-2324867 FORWARDmoderately similar to ( 464) FABI_BRANA Enoyl-[acyl-carrier-protein] reductase [NADH], chloroplast precursor (EC 1.3.1.9) (NADH-dependent enoyl-ACP reductase) - Brassica napus (Rape…	Lipid metabolism	3.35188	2.37505	1.33989e-05	2.68474e-05	0.220226	0.34335	0.362673	1
SC	c387.a2	GRMZM2G070343_P01*	Zm00001d051250	weakly similar to ( 139) AT3G15360 | Symbols: ATHM4, TRX-M4, ATM4 | TRX-M4 (ARABIDOPSIS THIOREDOXIN M-TYPE 4); enzyme activator | chr3:5188448-5189457 FORWARDweakly similar to ( 139) TRXM_BRANA Thioredoxin M-type, chloroplast precursor (TRX-M) - Brassica napus (Rape)moderately similar to ( 204) loc_os02g42700 12002.m09305 protein thioredoxin M-type, chloroplast precursor, putative, expressed seq=…	Folding, sorting and degradation	3.30865	3.07335	0.0182027	0.0252665	0.814006	0.874387	0.547748	1
SC	b51.a3	AC234166.1_FGP001	Zm00001d020342	highly similar to ( 557) AT1G56070 | Symbols: LOS1 | LOS1; copper ion binding / translation elongation factor/ translation factor, nucleic acid binding | chr1:20968245-20971077 REVERSEhighly similar to ( 555) EF2_BETVU Elongation factor 2 (EF-2) - Beta vulgaris (Sugar beet)highly similar to ( 587) loc_os04g02820 12004.m101449 protein elongation factor 2, putative, expressed seq=cds; coord=7:10439…	Translation	3.30807	2.78519	0.104112	0.129481	0.353575	0.479408	0.880043	1
XIC	c790.a1	GRMZM2G332976_P01	Zm00001d013015	moderately similar to ( 295) AT1G52340 | Symbols: ABA2, SIS4, GIN1, SDR1, ISI4, SRE1, ATABA2, ATSDR1 | ABA2 (ABA DEFICIENT 2); alcohol dehydrogenase/ oxidoreductase/ xanthoxin dehydrogenase | chr1:19489997-19491527 REVERSEmoderately similar to ( 241) TS2_MAIZE Sex determination protein tasselseed-2 - Zea mays (Maize)moderately similar to ( 412) loc_os03g59610 12003.m10858 protein sex determinatio…	misc	3.3027	4.57995	0	0	0	0	0.0298342	0.38439
XIC	d1066.a1	GRMZM2G704005_P01	Zm00001d033468	weakly similar to ( 116) AT2G32090 | Symbols: | lactoylglutathione lyase family protein / glyoxalase I family protein | chr2:13644720-13645608 FORWARDweakly similar to ( 195) loc_os03g45720 12003.m09595 protein lactoylglutathione lyase, putative, expressed seq=cds; coord=1:258878414..258878962:1; parent_gene=GRMZM2G704005	Xenobiotics degradation and metabolism	3.30221	2.8331	0	0	0	0	0.318295	0.848728
XIC	d1045.a1	GRMZM2G141665_P01	NA	moderately similar to ( 467) AT3G21360 | Symbols: | electron carrier/ oxidoreductase | chr3:7522865-7524036 FORWARDhighly similar to ( 595) loc_os01g09430 12001.m07568 protein syringomycin biosynthesis enzyme, putative, expressed seq=cds; coord=3:7135503..7137164:-1; parent_gene=GRMZM2G141665	notassigned	3.29332	3.44711	0	0	0	0	0.0887241	0.590208
SC	b10.a6	GRMZM2G348512_P01*	Zm00001d044096	moderately similar to ( 260) AT5G14740 | Symbols: CA2, CA18, BETA CA2 | CA2 (CARBONIC ANHYDRASE 2); carbonate dehydratase/ zinc ion binding | chr5:4758257-4762315 FORWARDmoderately similar to ( 338) CAHC_HORVU Carbonic anhydrase, chloroplast precursor (EC 4.2.1.1) (Carbonate dehydratase) - Hordeum vulgare (Barley)moderately similar to ( 331) loc_os01g45274 12001.m150428 protein carbonic anhydrase…	Energy metabolism	3.29019	1.81571	0	0	0.57736	0.679764	0.342174	1
XIC	c409.a1	GRMZM2G341729_P01	Zm00001d037573	weakly similar to ( 132) AT3G17020 | Symbols: | universal stress protein (USP) family protein | chr3:5802728-5804063 REVERSEweakly similar to ( 195) loc_os05g06500 12005.m05177 protein USP family protein, putative, expressed seq=cds; coord=6:126146579..126150071:1; parent_gene=GRMZM2G341729	Folding, sorting and degradation	3.28874	3.34562	0	0	0	0	0.150443	0.68316
XIC	d2135.a1	GRMZM2G164141_P01*	Zm00001d042746	moderately similar to ( 311) AT2G26230 | Symbols: | uricase / urate oxidase / nodulin 35, putative | chr2:11164956-11166968 FORWARDmoderately similar to ( 324) URIC1_SOYBN Uricase-2 isozyme 1 (EC 1.7.3.3) (Uricase II isozyme 1) (Urate oxidase) (Nodulin 35) (N-35) (Nodule-specific uricase) - Glycine max (Soybean)moderately similar to ( 417) loc_os01g64520 12001.m97562 protein uricase, putative, ex…	Nucleotide metabolism	3.26657	5.31139	0.867799	0.875454	0	0	0.999514	1
SC	c327.a1	GRMZM2G385287_P01	Zm00001d035902	moderately similar to ( 285) AT1G33140 | Symbols: PGY2 | PGY2 (PIGGYBACK2); structural constituent of ribosome | chr1:12023360-12024502 FORWARDmoderately similar to ( 329) RL9_ORYSA 60S ribosomal protein L9 - Oryza sativa (Rice)moderately similar to ( 329) loc_os09g31180 12009.m060014 protein 60S ribosomal protein L9, putative, expressed seq=cds; coord=6:56216948..56219146:-1; parent_gene=GRMZM2G…	Translation	3.24338	2.33176	0.00379422	0.00579851	0.185355	0.30902	0.515567	1
XIC	c692.a1	GRMZM2G012342_P01	Zm00001d046629	very weakly similar to (94.7) loc_os06g43130 12006.m08843 protein ABC-type sugar transport system, permease component, putative, expressed seq=cds; coord=9:96225245..96226378:1; parent_gene=GRMZM2G012342	notassigned	3.22768	2.01762	0	0	0.000842447	0.000974976	0.656887	1
SC	a8.a6	GRMZM2G118770_P01	Zm00001d012764	highly similar to ( 875) AT2G19900 | Symbols: ATNADP-ME1 | ATNADP-ME1 (NADP-malic enzyme 1); malate dehydrogenase (oxaloacetate-decarboxylating) (NADP+)/ malic enzyme/ oxidoreductase, acting on NADH or NADPH, NAD or NADP as acceptor | chr2:8592106-8595403 REVERSEhighly similar to ( 895) MAOX_VITVI NADP-dependent malic enzyme (EC 1.1.1.40) (NADP-ME) - Vitis vinifera (Grape)nearly identical (1007) …	Energy metabolism	3.20914	2.5231	0	0	0.730339	0.80226	0.990225	1
XIC	c582.a1	GRMZM2G035256_P01	Zm00001d039415	moderately similar to ( 249) AT1G27480 | Symbols: | lecithin:cholesterol acyltransferase family protein / LACT family protein | chr1:9544607-9546168 FORWARDhighly similar to ( 511) loc_os10g08026 12010.m04154 protein 1-O-acylceramide synthase precursor, putative, expressed seq=cds; coord=3:4546931..4548641:1; parent_gene=GRMZM2G035256	Lipid metabolism	3.18516	6.26061	0	0	0	0	0.203559	0.755247
XIC	d1279.a1	GRMZM2G045090_P01	Zm00001d029652	nearly identical (1976) AT5G37830 | Symbols: OXP1 | OXP1 (OXOPROLINASE 1); 5-oxoprolinase (ATP-hydrolyzing)/ hydrolase | chr5:15056635-15060525 REVERSEnearly identical (2212) loc_os01g73514 12001.m97467 protein 5-oxoprolinase, putative, expressed seq=cds; coord=1:79752405..79756496:-1; parent_gene=GRMZM2G045090	notassigned	3.18011	5.2191	0	0	0	0	0.664873	1
SC	c283.a1	GRMZM2G159643_P01	Zm00001d012607	moderately similar to ( 335) AT5G54500 | Symbols: FQR1 | FQR1 (FLAVODOXIN-LIKE QUINONE REDUCTASE 1); FMN binding / oxidoreductase, acting on NADH or NADPH, quinone or similar compound as acceptor | chr5:22124674-22126256 FORWARDmoderately similar to ( 385) loc_os01g57570 12001.m43222 protein minor allergen Alt a 7, putative, expressed seq=cds; coord=8:171852196..171855863:-1; parent_gene=GRMZM2G1…	Lipid metabolism	3.17883	2.9281	0.114696	0.141668	0.000779093	0.00366512	0.353304	1
XIC	c293.a1	GRMZM5G826194_P02	Zm00001d037240	moderately similar to ( 352) AT5G16710 | Symbols: DHAR3 | DHAR3 (dehydroascorbate reductase 1); glutathione dehydrogenase (ascorbate) | chr5:5483312-5484926 FORWARDmoderately similar to ( 398) loc_os06g12630 12006.m091563 protein dehydroascorbate reductase, putative, expressed seq=cds; coord=6:113584799..113595444:-1; parent_gene=GRMZM5G826194	Metabolism of other amino acids	3.16748	2.70961	0	0	0	0	0.00451672	0.167529
SC	c286.a2	GRMZM2G060702_P02	Zm00001d034644	weakly similar to ( 177) AT5G59890 | Symbols: ADF4, ATADF4 | ADF4 (ACTIN DEPOLYMERIZING FACTOR 4); actin binding | chr5:24123107-24123596 FORWARDmoderately similar to ( 277) ADF3_MAIZE Actin-depolymerizing factor 3 (ADF 3) (ZmABP3) (ZmADF3) - Zea mays (Maize)moderately similar to ( 222) loc_os03g60590 12003.m101135 protein actin-depolymerizing factor 3, putative, expressed seq=cds; coord=1:293163…	Cell motility	3.16646	3.2018	0	0	0.0735216	0.149812	0.257028	1
XIC	c226.a1	GRMZM5G837108_P02	Zm00001d017857	highly similar to ( 550) AT3G08580 | Symbols: AAC1 | AAC1 (ADP/ATP CARRIER 1); ATP:ADP antiporter/ binding | chr3:2605706-2607030 REVERSEhighly similar to ( 658) ADT1_MAIZE ADP,ATP carrier protein 1, mitochondrial precursor (ADP/ATP translocase 1) (Adenine nucleotide translocator 1) (ANT 1) - Zea mays (Maize)highly similar to ( 597) loc_os02g48720 12002.m33839 protein ADP,ATP carrier protein, mit…	Carbohydrate metabolism	3.16194	2.22378	1.561e-11	2.49839e-11	0.000111771	0.000134259	0.614073	0.990041
SC	c484.a1	GRMZM2G013478_P01	Zm00001d023833	moderately similar to ( 240) AT5G63310 | Symbols: NDPK2, NDPK1A, NDPK IA IA, NDPK IA, ATNDPK2 | NDPK2 (NUCLEOSIDE DIPHOSPHATE KINASE 2); ATP binding / nucleoside diphosphate kinase/ protein binding | chr5:25372122-25373838 REVERSEmoderately similar to ( 254) NDK2_TOBAC Nucleoside diphosphate kinase 2, chloroplast precursor (EC 2.7.4.6) (Nucleoside diphosphate kinase II) (NDK II) (NDP kinase II) (…	Nucleotide metabolism	3.14424	3.04006	5.51959e-09	1.51195e-08	0.00791809	0.02612	0.289963	1
XIC	c607.a1	GRMZM2G352415_P01*	Zm00001d034807	moderately similar to ( 417) AT2G44060 | Symbols: | late embryogenesis abundant family protein / LEA family protein | chr2:18226922-18227988 FORWARDvery weakly similar to (89.7) LEA14_GOSHI Late embryogenesis abundant protein Lea14-A - Gossypium hirsutum (Upland cotton)highly similar to ( 525) loc_os03g62620 12003.m101565 protein salt tolerance protein, putative, expressed seq=cds; coord=1:297016…	Signaling molecules and interactions	3.13755	3.75937	0	0	0	0	0.000417495	0.0453119
XIC	c806.a2	GRMZM2G073725_P01	Zm00001d033174	highly similar to ( 656) AT5G15650 | Symbols: RGP2, ATRGP2 | RGP2 (REVERSIBLY GLYCOSYLATED POLYPEPTIDE 2); transferase, transferring hexosyl groups | chr5:5092203-5094093 FORWARDhighly similar to ( 737) UPTG_MAIZE Alpha-1,4-glucan-protein synthase [UDP-forming] (EC 2.4.1.112) (UDP-glucose:protein transglucosylase) (UPTG) (Amylogenin) (Golgi-associated protein se-wap41) - Zea mays (Maize)highly si…	Carbohydrate metabolism	3.12872	3.48147	6.22946e-12	1.01118e-11	3.33067e-16	6.57768e-16	0.00131195	0.0764681
SC	c327.a2	GRMZM2G084739_P01	Zm00001d045578	moderately similar to ( 296) AT1G33140 | Symbols: PGY2 | PGY2 (PIGGYBACK2); structural constituent of ribosome | chr1:12023360-12024502 FORWARDmoderately similar to ( 345) RL9_ORYSA 60S ribosomal protein L9 - Oryza sativa (Rice)moderately similar to ( 345) loc_os09g31180 12009.m060014 protein 60S ribosomal protein L9, putative, expressed seq=cds; coord=9:27092199..27094638:1; parent_gene=GRMZM2G0…	Translation	3.12258	2.24381	0.00607331	0.00903895	0.201042	0.325153	0.65223	1
XIC	b45.a2	GRMZM2G077015_P01	Zm00001d041777	moderately similar to ( 480) AT2G44450 | Symbols: BGLU15 | BGLU15 (BETA GLUCOSIDASE 15); catalytic/ cation binding / hydrolase, hydrolyzing O-glycosyl compounds | chr2:18340966-18343744 FORWARDhighly similar to ( 786) BGLC_MAIZE Beta-glucosidase, chloroplast precursor (EC 3.2.1.21) (Gentiobiase) (Cellobiase) (Beta-D-glucoside glucohydrolase) - Zea mays (Maize)highly similar to ( 522) loc_os04g398…	Carbohydrate metabolism	3.12197	6.98296	0	0	0	0	0.0377832	0.429927
SC	b58.a3	GRMZM2G020801_P01	Zm00001d049409	nearly identical (1422) AT2G05710 | Symbols: | aconitate hydratase, cytoplasmic, putative / citrate hydro-lyase/aconitase, putative | chr2:2141591-2146350 FORWARDnearly identical (1497) ACOC_ORYSA Putative aconitate hydratase, cytoplasmic (EC 4.2.1.3) (Citrate hydro-lyase) (Aconitase) - Oryza sativa (Rice)nearly identical (1497) loc_os08g09200 12008.m05055 protein aconitate hydratase, cytoplasmic…	Carbohydrate metabolism	3.12034	2.19692	0	0	0.0378942	0.0881754	0.927728	1
XIC	d1777.a1	GRMZM2G109743_P01*	Zm00001d019439	moderately similar to ( 263) AT4G05530 | Symbols: IBR1, SDRA | IBR1 (INDOLE-3-BUTYRIC ACID RESPONSE 1); binding / catalytic/ oxidoreductase | chr4:2816462-2818074 FORWARDvery weakly similar to (88.6) GRDH_DAUCA Glucose and ribitol dehydrogenase (EC 1.1.1.-) (Carrot ABA-induced in somatic embryos 5 protein) - Daucus carota (Carrot)moderately similar to ( 317) loc_os09g04730 12009.m22042 protein de…	misc	3.12016	3.14916	1.56708e-07	2.26856e-07	0	0	0.735506	1
XIC	c787.a1	GRMZM2G035620_P01	Zm00001d044575	moderately similar to ( 386) AT2G32520 | Symbols: | dienelactone hydrolase family protein | chr2:13805823-13807442 REVERSEmoderately similar to ( 462) loc_os01g34700 12001.m150872 protein protein usf, putative, expressed seq=cds; coord=3:228250718..228270546:-1; parent_gene=GRMZM2G035620	misc	3.10676	3.30879	0	0	0	0	0.891477	1
XIC	d1035.a1	GRMZM2G155911_P01	NA	moderately similar to ( 263) AT3G16520 | Symbols: UGT88A1 | UDP-glucoronosyl/UDP-glucosyl transferase family protein | chr3:5618847-5620833 REVERSEweakly similar to ( 135) ZOX_PHAVU Zeatin O-xylosyltransferase (EC 2.4.2.40) (Zeatin O-beta-D-xylosyltransferase) - Phaseolus vulgaris (Kidney bean) (French bean)highly similar to ( 627) loc_os07g32020 12007.m07468 protein anthocyanidin 3-O-glucosyltra…	Carbohydrate metabolism	3.10138	3.63982	0	0	0	0	0.00735418	0.215971
XIC	c505.a1	GRMZM2G175423_P01	Zm00001d031727	highly similar to ( 540) AT5G51970 | Symbols: | sorbitol dehydrogenase, putative / L-iditol 2-dehydrogenase, putative | chr5:21111820-21113284 FORWARDhighly similar to ( 619) loc_os08g43190 12008.m08293 protein sorbitol dehydrogenase, putative, expressed seq=cds; coord=1:197267922..197271011:1; parent_gene=GRMZM2G175423	Carbohydrate metabolism	3.06021	6.01783	0	0	0	0	0.952624	1
XIC	b47.a1	GRMZM2G421857_P01*	Zm00001d053765	nearly identical (1140) AT1G78900 | Symbols: VHA-A | VHA-A (VACUOLAR ATP SYNTHASE SUBUNIT A); ATP binding / hydrogen ion transporting ATP synthase, rotational mechanism / hydrolase, acting on acid anhydrides, catalyzing transmembrane movement of substances / proton-transporting ATPase, rotational mechanism | chr1:29660463-29664575 FORWARDnearly identical (1164) VATA_DAUCA Vacuolar ATP synthase ca…	Membrane transport	3.04837	2.15326	0	0	8.43769e-15	1.60584e-14	0.100986	0.616007
XIC	c212.a2	GRMZM2G063676_P01	Zm00001d009950	nearly identical (1150) AT1G79920 | Symbols: | ATP binding | chr1:30058935-30062224 REVERSEmoderately similar to ( 305) HSP7C_PETHY Heat shock cognate 70 kDa protein - Petunia hybrida (Petunia)nearly identical (1320) loc_os01g08560 12001.m150497 protein heat shock 70 kDa protein 4, putative, expressed seq=cds; coord=8:90052293..90060254:-1; parent_gene=GRMZM2G063676	Folding, sorting and degradation	3.03217	2.60766	0	0	1.06581e-14	2.01623e-14	0.0202228	0.349083
SC	c192.a2	GRMZM2G061135_P01*	Zm00001d024754	highly similar to ( 709) AT4G01850 | Symbols: SAM-2, MAT2 | SAM-2 (S-ADENOSYLMETHIONINE SYNTHETASE 2); methionine adenosyltransferase | chr4:796298-797479 REVERSEhighly similar to ( 753) METK_ORYSA S-adenosylmethionine synthetase 1 (EC 2.5.1.6) (Methionine adenosyltransferase 1) (AdoMet synthetase 1) - Oryza sativa (Rice)highly similar to ( 753) loc_os05g04510 12005.m27538 protein S-adenosylmethi…	AminoAcid metabolism	3.02998	3.11452	1.73676e-06	3.7963e-06	0.00365144	0.0134383	0.881179	1
SC	c192.a1	GRMZM2G117198_P01	Zm00001d010920	highly similar to ( 711) AT4G01850 | Symbols: SAM-2, MAT2 | SAM-2 (S-ADENOSYLMETHIONINE SYNTHETASE 2); methionine adenosyltransferase | chr4:796298-797479 REVERSEhighly similar to ( 755) METK_ORYSA S-adenosylmethionine synthetase 1 (EC 2.5.1.6) (Methionine adenosyltransferase 1) (AdoMet synthetase 1) - Oryza sativa (Rice)highly similar to ( 755) loc_os05g04510 12005.m27538 protein S-adenosylmethi…	AminoAcid metabolism	3.01675	3.15589	1.03351e-06	2.31045e-06	0.00271044	0.0105873	0.854938	1
XIC	c282.a2	GRMZM2G022413_P01	Zm00001d003271	moderately similar to ( 249) AT5G61640 | Symbols: PMSR1, ATMSRA1 | PMSR1 (PEPTIDEMETHIONINE SULFOXIDE REDUCTASE 1); oxidoreductase, acting on sulfur group of donors, disulfide as acceptor / peptide-methionine-(S)-S-oxide reductase | chr5:24775107-24776147 FORWARDmoderately similar to ( 254) MSRA_FRAAN Peptide methionine sulfoxide reductase (EC 1.8.4.11) (Protein-methionine-S-oxide reductase) (Pep…	Folding, sorting and degradation	3.01639	11.1924	6.19923e-07	8.80207e-07	0	0	0.162622	0.718086
SC	b50.a4	GRMZM2G334628_P01*	Zm00001d039777	moderately similar to ( 412) AT3G08590 | Symbols: | 2,3-biphosphoglycerate-independent phosphoglycerate mutase, putative / phosphoglyceromutase, putative | chr3:2608683-2611237 REVERSEmoderately similar to ( 464) PMGI_MAIZE 2,3-bisphosphoglycerate-independent phosphoglycerate mutase (EC 5.4.2.1) (Phosphoglyceromutase) (BPG-independent PGAM) (PGAM-I) - Zea mays (Maize)moderately similar to ( 430) …	Carbohydrate metabolism	3.00662	2.90821	0.339831	0.384172	0.691542	0.776565	0.928321	1
XIC	c470.a1	GRMZM2G439201_P02	Zm00001d022513	weakly similar to ( 159) AT2G18110 | Symbols: | elongation factor 1-beta, putative / EF-1-beta, putative | chr2:7872636-7873713 FORWARDweakly similar to ( 166) EF1B_ORYSA Elongation factor 1-beta (EF-1-beta) (Elongation factor 1B-alpha 2) (eEF-1B alpha) (Elongation factor 1-beta) (EF-1-beta) - Oryza sativa (Rice)weakly similar to ( 166) loc_os07g46750 12007.m08892 protein elongation factor 1-beta…	Translation	3.00586	6.00829	0.000963506	0.00120128	0	0	0.387088	0.900752
XIC	c782.a1	GRMZM2G019958_P01*	Zm00001d013348	moderately similar to ( 288) AT5G65840 | Symbols: | FUNCTIONS IN: molecular_function unknown; INVOLVED IN: biological_process unknown; LOCATED IN: chloroplast stroma, chloroplast; EXPRESSED IN: 22 plant structures; EXPRESSED DURING: 13 growth stages; CONTAINS InterPro DOMAIN/s: Thioredoxin fold (InterPro:IPR012335), Thioredoxin-like fold (InterPro:IPR012336); BEST Arabidopsis thaliana protein mat…	notassigned	2.98771	7.47741	0.599218	0.617376	0	0	0.0844261	0.58552
XIC	c472.a1	GRMZM2G123558_P01*	Zm00001d039283	weakly similar to ( 129) SRS1_ORYSA Salt-stress root protein RS1 - Oryza sativa (Rice)weakly similar to ( 129) loc_os01g13210 12001.m42933 protein DREPP4 protein, putative, expressed seq=cds; coord=3:1711861..1714122:1; parent_gene=GRMZM2G123558	Folding, sorting and degradation	2.98572	4.56276	0.000296226	0.00037987	0	0	0.0322075	0.39422
XIC	d1468.a1	GRMZM2G010987_P01	Zm00001d011649	moderately similar to ( 376) AT3G16520 | Symbols: UGT88A1 | UDP-glucoronosyl/UDP-glucosyl transferase family protein | chr3:5618847-5620833 REVERSEweakly similar to ( 163) ZOX_PHAVU Zeatin O-xylosyltransferase (EC 2.4.2.40) (Zeatin O-beta-D-xylosyltransferase) - Phaseolus vulgaris (Kidney bean) (French bean)highly similar to ( 714) loc_os01g50200 12001.m11204 protein anthocyanidin 5,3-O-glucosylt…	Carbohydrate metabolism	2.97788	3.73153	0	0	0	0	0.146641	0.682466
XIC	c143.a2	GRMZM2G035502_P01	Zm00001d035595	moderately similar to ( 292) AT1G75270 | Symbols: DHAR2 | DHAR2 (DEHYDROASCORBATE REDUCTASE 2); glutathione binding / glutathione dehydrogenase (ascorbate) | chr1:28250255-28251237 REVERSEmoderately similar to ( 375) loc_os05g02530 12005.m04789 protein chloride intracellular channel 6, putative, expressed seq=cds; coord=6:34430048..34433142:1; parent_gene=GRMZM2G035502	Metabolism of other amino acids	2.97518	4.61515	0	0	0	0	0.113728	0.616007
XIC	d1098.a1	GRMZM2G481261_P01	Zm00001d038946	moderately similar to ( 223) AT4G32590 | Symbols: | ferredoxin-related | chr4:15721417-15722781 FORWARDmoderately similar to ( 235) loc_os05g48160 12005.m27636 protein electron carrier/ electron transporter/ iron ion binding protein, putative, expressed seq=cds; coord=6:163178134..163181036:-1; parent_gene=GRMZM2G481261	Energy metabolism	2.96709	2.77407	0	0	1.794e-06	2.33387e-06	0.811042	1
XIC	c858.a1	GRMZM2G314955_P03	Zm00001d006896	moderately similar to ( 232) AT2G22475 | Symbols: GEM | GEM (GL2-EXPRESSION MODULATOR) | chr2:9541523-9544778 FORWARDmoderately similar to ( 308) loc_os07g42890 12007.m29269 protein FIP1, putative, expressed seq=cds; coord=2:211946552..211950130:1; parent_gene=GRMZM2G314955	Chemical structure transformation maps	2.94188	3.0571	0	0	2.5454e-05	3.12097e-05	0.777483	1
XIC	d1326.a1	GRMZM2G067601_P01	Zm00001d011786	moderately similar to ( 221) AT2G32720 | Symbols: B5 #4, ATCB5-B, CB5-B | CB5-B (CYTOCHROME B5 ISOFORM B); heme binding | chr2:13877013-13878447 REVERSEmoderately similar to ( 243) CYB5_ORYSA Cytochrome b5 - Oryza sativa (Rice)moderately similar to ( 255) loc_os01g73990 12001.m13426 protein cytochrome b5, putative, expressed seq=cds; coord=8:156723828..156725452:-1; parent_gene=GRMZM2G067601	Energy metabolism	2.93543	4.58955	2.88658e-15	5.01563e-15	6.4414e-12	1.06342e-11	0.844756	1
XIC	d1026.a1	GRMZM2G088565_P01	Zm00001d000227	highly similar to ( 568) AT1G30120 | Symbols: PDH-E1 BETA | PDH-E1 BETA (PYRUVATE DEHYDROGENASE E1 BETA); pyruvate dehydrogenase (acetyl-transferring) | chr1:10584350-10586477 REVERSEmoderately similar to ( 403) ODPB_MESVI Pyruvate dehydrogenase E1 component subunit beta (EC 1.2.4.1) - Mesostigma viridehighly similar to ( 628) loc_os12g42230 12012.m08002 protein pyruvate dehydrogenase E1 componen…	Carbohydrate metabolism	2.92857	2.15962	0	0	0	0	0.0157641	0.327039
XIC	b57.a2	GRMZM2G079348_P01*	Zm00001d054044	highly similar to ( 739) AT1G20630 | Symbols: CAT1 | CAT1 (CATALASE 1); catalase | chr1:7146812-7149609 FORWARDhighly similar to ( 962) CATA3_MAIZE Catalase isozyme 3 (EC 1.11.1.6) - Zea mays (Maize)highly similar to ( 857) loc_os02g02400 12002.m77750 protein catalase isozyme A, putative, expressed seq=cds; coord=4:240105137..240108653:1; parent_gene=GRMZM2G079348	Folding, sorting and degradation	2.92778	10.0254	1.0234e-06	1.44009e-06	0	0	0.0538767	0.52756
SC	c221.a2	GRMZM2G136910_P01	Zm00001d023529	seq=cds; coord=10:8848146..8849526:-1; parent_gene=GRMZM2G136910	notassigned	2.9095	2.53152	0	0	0.0228513	0.0610646	0.863696	1
XIC	d1673.a1	GRMZM2G075488_P02	Zm00001d045216	highly similar to ( 550) AT3G61540 | Symbols: | peptidase family protein | chr3:22773399-22775699 FORWARDhighly similar to ( 595) loc_os06g06820 12006.m05406 protein proline iminopeptidase, putative, expressed seq=cds; coord=9:16678350..16682612:1; parent_gene=GRMZM2G075488	Folding, sorting and degradation	2.90333	2.5698	0.326569	0.345231	1.0929e-12	1.88339e-12	0.895743	1
XIC	a4.a5	GRMZM2G116345_P01	NA	NA	NA	2.89648	2.58361	0.00490542	0.00592228	0.426715	0.434661	0.965254	1
SC	b33.a4	GRMZM2G399073_P02*	Zm00001d014792	nearly identical (1105) AT4G24190 | Symbols: SHD | SHD (SHEPHERD); ATP binding / unfolded protein binding | chr4:12551902-12555851 REVERSEnearly identical (1237) ENPL_HORVU Endoplasmin homolog precursor (GRP94 homolog) - Hordeum vulgare (Barley)nearly identical (1244) loc_os06g50300 12006.m31934 protein endoplasmin homolog precursor, putative, expressed seq=cds; coord=5:61527567..61532764:-1; par…	Folding, sorting and degradation	2.89255	2.72066	6.35393e-06	1.30455e-05	1.08606e-06	8.90238e-06	0.600408	1
XIC	a8.a2	GRMZM2G159724_P01*	Zm00001d043601	highly similar to ( 940) AT5G11670 | Symbols: ATNADP-ME2 | ATNADP-ME2 (NADP-malic enzyme 2); malate dehydrogenase (oxaloacetate-decarboxylating) (NADP+)/ malic enzyme/ oxidoreductase, acting on NADH or NADPH, NAD or NADP as acceptor | chr5:3754456-3758040 FORWARDhighly similar to ( 977) MAOX_VITVI NADP-dependent malic enzyme (EC 1.1.1.40) (NADP-ME) - Vitis vinifera (Grape)nearly identical (1080) …	Energy metabolism	2.88446	2.17102	0	0	9.32587e-15	1.76686e-14	0.0558072	0.529519
XIC	c753.a1	GRMZM2G440289_P01	NA	NA	NA	2.88267	2.73855	0.000112236	0.000146618	0.0358114	0.0382434	0.781094	1
SC	c252.a1	GRMZM2G126821_P01	Zm00001d048346	moderately similar to ( 391) AT1G72370 | Symbols: P40, AP40, RP40, RPSAA | P40; structural constituent of ribosome | chr1:27243148-27244842 REVERSEmoderately similar to ( 417) RSSA_SOYBN 40S ribosomal protein SA (p40) - Glycine max (Soybean)moderately similar to ( 498) loc_os03g08440 12003.m35048 protein 40S ribosomal protein SA, putative, expressed seq=cds; coord=9:151669372..151671810:-1; paren…	Translation	2.87724	3.09406	0	0	0.0289497	0.0720083	0.0284967	0.46937
XIC	c595.a1	GRMZM2G169699_P04	Zm00001d015004	moderately similar to ( 486) AT1G73060 | Symbols: | unknown protein | chr1:27479027-27481258 FORWARDhighly similar to ( 579) loc_os02g02520 12002.m05601 protein expressed protein seq=cds; coord=5:69973784..69977486:1; parent_gene=GRMZM2G169699	notassigned	2.871	2.29629	0.213307	0.228959	5.27206e-10	7.99067e-10	0.657955	1
XIC	c550.a1	GRMZM2G096585_P03*	Zm00001d031569	highly similar to ( 756) AT3G25230 | Symbols: ROF1, ATFKBP62, FKBP62 | ROF1 (ROTAMASE FKBP 1); FK506 binding / calmodulin binding / peptidyl-prolyl cis-trans isomerase | chr3:9188257-9191175 FORWARDhighly similar to ( 830) FKB70_WHEAT 70 kDa peptidyl-prolyl isomerase (EC 5.2.1.8) (Peptidyl-prolyl cis-trans isomerase) (PPIase) (Rotamase) - Triticum aestivum (Wheat)highly similar to ( 844) loc_os08…	Cell growth and death	2.86999	2.33656	0	0	0.00824599	0.00911551	0.9624	1
XIC	d1189.a1	GRMZM2G112337_P01*	Zm00001d036827	moderately similar to ( 349) AT5G10770 | Symbols: | chloroplast nucleoid DNA-binding protein, putative | chr5:3403331-3405331 REVERSEhighly similar to ( 543) loc_os06g40818 12006.m08616 protein aspartic proteinase nepenthesin-1 precursor, putative, expressed seq=cds; coord=6:99767719..99770826:-1; parent_gene=GRMZM2G112337	Transcription	2.84823	3.43699	0	0	0	0	0.716221	1
XIC	c394.a2	GRMZM2G089944_P01	Zm00001d043348	highly similar to ( 726) AT4G37550 | Symbols: | formamidase, putative / formamide amidohydrolase, putative | chr4:17643684-17645249 FORWARDhighly similar to ( 837) loc_os01g55950 12001.m11751 protein acetamidase, putative, expressed seq=cds; coord=3:194348658..194355579:1; parent_gene=GRMZM2G089944	misc	2.82156	9.51033	0.000191926	0.000248009	0	0	0.341245	0.865562
XIC	d1267.a1	AC206968.3_FGP003	Zm00001d003567	highly similar to ( 539) AT1G29150 | Symbols: ATS9, RPN6 | ATS9 (ARABIDOPSIS NON-ATPASE SUBUNIT 9) | chr1:10181240-10182499 FORWARDhighly similar to ( 642) loc_os04g36700 12004.m08710 protein 26S proteasome non-ATPase regulatory subunit 11, putative, expressed seq=cds; coord=2:46344346..46345626:-1; parent_gene=AC206968.3_FG003	Folding, sorting and degradation	2.82137	2.71575	0.0679384	0.0761056	0.0235268	0.0253831	0.883621	1
SC	c322.a2	GRMZM2G135498_P01	Zm00001d037108	highly similar to ( 728) AT5G46290 | Symbols: KAS I | KAS I (3-KETOACYL-ACYL CARRIER PROTEIN SYNTHASE I); catalytic/ fatty-acid synthase | chr5:18774439-18776629 REVERSEhighly similar to ( 749) KASC1_HORVU 3-oxoacyl-[acyl-carrier-protein] synthase I, chloroplast precursor (EC 2.3.1.41) (Beta-ketoacyl-ACP synthase I) (KAS I) - Hordeum vulgare (Barley)highly similar to ( 804) loc_os06g09630 12006.m…	Lipid metabolism	2.81797	3.02001	0	0	0.0371597	0.087406	0.185548	0.994451
XIC	c498.a1	GRMZM2G399183_P01	Zm00001d023699	weakly similar to ( 188) AT2G35370 | Symbols: GDCH | GDCH; glycine dehydrogenase (decarboxylating) | chr2:14891239-14892050 FORWARDmoderately similar to ( 231) GCSH_ORYSA Glycine cleavage system H protein, mitochondrial precursor - Oryza sativa (Rice)moderately similar to ( 231) loc_os10g37180 12010.m06515 protein glycine cleavage system H protein, mitochondrial precursor, putative, expressed seq…	Energy metabolism	2.8136	2.21591	0.000726025	0.000912427	0.000120346	0.000144049	0.468557	0.939841
XIC	c305.a1	GRMZM2G048121_P01	Zm00001d000060	moderately similar to ( 310) AT1G59960 | Symbols: | aldo/keto reductase, putative | chr1:22071410-22073067 REVERSEmoderately similar to ( 356) NADO1_ORYSA Probable NAD(P)H-dependent oxidoreductase 1 (EC 1.1.1.-) - Oryza sativa (Rice)moderately similar to ( 449) loc_os10g02490 12010.m065212 protein NAD(P)H-dependent oxidoreductase, putative, expressed seq=cds; coord=1:113341782..113343398:-1; pare…	Carbohydrate metabolism	2.79713	4.41259	0	0	0	0	0.769951	1
XIC	c475.a1	GRMZM2G156516_P01*	Zm00001d034739	moderately similar to ( 312) AT4G15940 | Symbols: | fumarylacetoacetate hydrolase family protein | chr4:9038361-9040163 FORWARDmoderately similar to ( 383) loc_os03g61330 12003.m101552 protein fumarylacetoacetate hydrolase domain-containing protein 1, putative, expressed seq=cds; coord=1:295533612..295536934:1; parent_gene=GRMZM2G156516	AminoAcid metabolism	2.79164	2.4636	0	0	0	0	0.427994	0.928761
XIC	c626.a1	GRMZM2G090087_P02	NA	highly similar to ( 874) AT5G62530 | Symbols: ALDH12A1, ATP5CDH, P5CDH | ALDH12A1; 1-pyrroline-5-carboxylate dehydrogenase/ 3-chloroallyl aldehyde dehydrogenase | chr5:25099768-25103159 REVERSEvery weakly similar to (83.2) AL7A1_MALDO Aldehyde dehydrogenase family 7 member A1 (EC 1.2.1.3) (Antiquitin-1) (Matured fruit 60 kDa protein) (MF-60) - Malus domestica (Apple) (Malus sylvestris)highly simi…	AminoAcid metabolism	2.79072	3.05403	0	0	0	0	0.517814	0.954782
XIC	d1186.a1	GRMZM2G040933_P01*	Zm00001d005950	highly similar to ( 712) AT5G64290 | Symbols: DCT, DIT2.1 | DIT2.1 (DICARBOXYLATE TRANSPORT 2.1); oxoglutarate:malate antiporter | chr5:25714495-25716642 REVERSEmoderately similar to ( 430) SOT1_SPIOL 2-oxoglutarate/malate translocator, chloroplast precursor - Spinacia oleracea (Spinach)highly similar to ( 793) loc_os09g29430 12009.m06094 protein 2-oxoglutarate/malate translocator, chloroplast pr…	Membrane transport	2.78736	3.18307	0.00155332	0.00191388	1.97081e-08	2.80462e-08	0.518343	0.954782
XIC	d1174.a1	GRMZM2G031572_P01	Zm00001d032472	highly similar to ( 625) AT4G36195 | Symbols: | serine carboxypeptidase S28 family protein | chr4:17127202-17129787 FORWARDhighly similar to ( 887) loc_os10g36760 12010.m06482 protein prolyl carboxypeptidase like protein, putative, expressed seq=cds; coord=1:224236124..224244611:-1; parent_gene=GRMZM2G031572	Folding, sorting and degradation	2.78629	6.29203	8.34566e-05	0.00010982	0	0	0.581365	0.973448
XIC	c421.a1	GRMZM2G103342_P01	Zm00001d042022	moderately similar to ( 285) AT1G71695 | Symbols: | peroxidase 12 (PER12) (P12) (PRXR6) | chr1:26964359-26966557 FORWARDweakly similar to ( 191) PER1_SORBI Cationic peroxidase SPC4 precursor (EC 1.11.1.7) (Fragment) - Sorghum bicolor (Sorghum) (Sorghum vulgare)moderately similar to ( 379) loc_os01g73170 12001.m13346 protein peroxidase 12 precursor, putative, expressed seq=cds; coord=3:146522696..…	Carbohydrate metabolism	2.78339	5.70526	0	0	0	0	0.00287517	0.136706
XIC	d1248.a1	GRMZM2G051129_P02	Zm00001d022622	highly similar to ( 587) AT5G66120 | Symbols: | 3-dehydroquinate synthase, putative | chr5:26431516-26433649 REVERSEhighly similar to ( 696) loc_os09g36800 12009.m06629 protein 3-dehydroquinate synthase, putative, expressed seq=cds; coord=7:175831402..175835142:1; parent_gene=GRMZM2G051129	AminoAcid metabolism	2.7743	2.42724	1.4586e-11	2.33748e-11	6.33738e-12	1.04762e-11	0.030956	0.386607
XIC	c670.a1	GRMZM2G170812_P01	Zm00001d047463	moderately similar to ( 385) AT4G31530 | Symbols: | binding / catalytic | chr4:15282281-15284064 FORWARDmoderately similar to ( 412) loc_os03g23980 12003.m07744 protein 3-beta hydroxysteroid dehydrogenase/isomerase family protein, putative, expressed seq=cds; coord=9:128661311..128665430:1; parent_gene=GRMZM2G170812	Signal transduction	2.76949	2.76629	0	0	0	0	0.000746161	0.0507389
XIC	c507.a1	GRMZM2G156068_P01	Zm00001d051595	weakly similar to ( 192) AT5G13450 | Symbols: | ATP synthase delta chain, mitochondrial, putative / H(+)-transporting two-sector ATPase, delta (OSCP) subunit, putative | chr5:4310558-4311941 REVERSEmoderately similar to ( 222) ATPO_IPOBA ATP synthase delta chain, mitochondrial precursor (EC 3.6.3.14) (Oligomycin sensitivity conferral protein) (OSCP) - Ipomoea batatas (Sweet potato) (Batate)modera…	Energy metabolism	2.75457	2.83403	7.65412e-05	0.000100826	2.57727e-11	4.13547e-11	0.939335	1
SC	c318.a1	GRMZM2G436199_P01	Zm00001d001843	weakly similar to ( 149) AT1G50320 | Symbols: ATHX, ATX | ATHX; enzyme activator | chr1:18638606-18639464 REVERSEvery weakly similar to (88.2) TRXM_SPIOL Thioredoxin M-type, chloroplast precursor (TRX-M) [Contains: Thioredoxin M-type Mc; Thioredoxin M-type Md] - Spinacia oleracea (Spinach)moderately similar to ( 206) loc_os04g57930 12004.m10677 protein thioredoxin X, chloroplast precursor, putati…	Folding, sorting and degradation	2.75438	3.06339	0.995054	0.995054	0.48047	0.588753	0.678956	1
SC	b20.a3	GRMZM2G039345_P01	Zm00001d001995	moderately similar to ( 294) AT1G73110 | Symbols: | ribulose bisphosphate carboxylase/oxygenase activase, putative / RuBisCO activase, putative | chr1:27494344-27496844 REVERSEmoderately similar to ( 202) RCA_MAIZE Ribulose bisphosphate carboxylase/oxygenase activase, chloroplast precursor (RuBisCO activase) (RA) - Zea mays (Maize)moderately similar to ( 344) loc_os04g56320 12004.m10522 protein r…	Energy metabolism	2.7535	2.57628	0	0	0.0274861	0.0695594	0.787691	1
XIC	c114.a1	GRMZM2G346455_P05*	Zm00001d032605	highly similar to ( 542) AT5G08370 | Symbols: AtAGAL2 | AtAGAL2 (Arabidopsis thaliana ALPHA-GALACTOSIDASE 2); alpha-galactosidase/ catalytic/ hydrolase, hydrolyzing O-glycosyl compounds | chr5:2691116-2693441 REVERSEhighly similar to ( 692) AGAL_ORYSA Alpha-galactosidase precursor (EC 3.2.1.22) (Melibiase) (Alpha-D-galactoside galactohydrolase) - Oryza sativa (Rice)highly similar to ( 692) loc_os…	Carbohydrate metabolism	2.74738	2.76709	0	0	8.12683e-14	1.48383e-13	0.312964	0.848728
XIC	c844.a1	GRMZM2G015784_P01*	Zm00001d018134	weakly similar to ( 134) AT5G64350 | Symbols: FKBP12, ATFKBP12 | FKBP12 (FK506-BINDING PROTEIN); FK506 binding / peptidyl-prolyl cis-trans isomerase | chr5:25734810-25735990 REVERSEweakly similar to ( 139) FKB12_VICFA Peptidyl-prolyl isomerase FKBP12 (EC 5.2.1.8) (12 kDa FK506-binding protein) (12 kDa FKBP) (FKBP-12) (Immunophilin FKBP12) (Peptidyl-prolyl cis-trans isomerase) (PPIase) (Rotamase) …	Folding, sorting and degradation	2.73841	3.66212	0	0	0	0	0.00450041	0.167529
XIC	c968.a1	GRMZM2G081144_P01	Zm00001d015484	moderately similar to ( 299) AT2G23820 | Symbols: | metal-dependent phosphohydrolase HD domain-containing protein | chr2:10140595-10142672 FORWARDmoderately similar to ( 334) loc_os02g08260 12002.m06172 protein HDDC2 protein, putative, expressed seq=cds; coord=5:90564896..90569442:1; parent_gene=GRMZM2G081144	notassigned	2.73144	2.25137	1.53735e-08	2.30511e-08	2.26458e-07	3.08985e-07	0.538762	0.95646
XIC	c632.a1	GRMZM2G080650_P01	Zm00001d023990	moderately similar to ( 441) AT3G03080 | Symbols: | NADP-dependent oxidoreductase, putative | chr3:698530-700278 REVERSEhighly similar to ( 552) loc_os12g12560 12012.m05229 protein NADP-dependent oxidoreductase P2, putative, expressed seq=cds; coord=10:33743564..33750370:-1; parent_gene=GRMZM2G080650	misc	2.72991	6.16429	0	0	0	0	0.945174	1
XIC	c263.a2	GRMZM2G043291_P01*	NA	moderately similar to ( 289) AT3G55040 | Symbols: GSTL2 | GSTL2 | chr3:20398718-20400305 REVERSEmoderately similar to ( 323) IN21_MAIZE IN2-1 protein - Zea mays (Maize)moderately similar to ( 427) loc_os03g17470 12003.m07174 protein IN2-1 protein, putative, expressed seq=cds; coord=1:43109844..43112305:-1; parent_gene=GRMZM2G043291	misc	2.71998	3.00761	0	0	0	0	0.000507154	0.0453119
XIC	c977.a1	GRMZM2G150791_P01	Zm00001d021645	weakly similar to ( 188) AT1G50900 | Symbols: | FUNCTIONS IN: molecular_function unknown; INVOLVED IN: biological_process unknown; LOCATED IN: chloroplast, chloroplast stroma; EXPRESSED IN: 22 plant structures; EXPRESSED DURING: 13 growth stages; CONTAINS InterPro DOMAIN/s: Ankyrin (InterPro:IPR002110); Has 30 Blast hits to 30 proteins in 12 species: Archae - 0; Bacteria - 0; Metazoa - 0; Fungi -…	notassigned	2.71973	3.16044	0.000125201	0.000162878	3.33067e-16	6.57768e-16	0.141919	0.67069
XIC	b10.a5	GRMZM2G348512_P03*	Zm00001d044096	moderately similar to ( 241) AT5G14740 | Symbols: CA2, CA18, BETA CA2 | CA2 (CARBONIC ANHYDRASE 2); carbonate dehydratase/ zinc ion binding | chr5:4758257-4762315 FORWARDmoderately similar to ( 340) CAHC_HORVU Carbonic anhydrase, chloroplast precursor (EC 4.2.1.1) (Carbonate dehydratase) - Hordeum vulgare (Barley)moderately similar to ( 341) loc_os01g45274 12001.m150428 protein carbonic anhydrase…	Energy metabolism	2.71793	2.79011	0	0	1.66922e-11	2.70603e-11	0.867305	1
SC	c272.a1	GRMZM5G803490_P01	Zm00001d002880	highly similar to ( 597) AT1G80560 | Symbols: | 3-isopropylmalate dehydrogenase, chloroplast, putative | chr1:30287833-30290126 FORWARDhighly similar to ( 597) LEU3_BRANA 3-isopropylmalate dehydrogenase, chloroplast precursor (EC 1.1.1.85) (Beta-IPM dehydrogenase) (IMDH) (3-IPM-DH) - Brassica napus (Rape)highly similar to ( 662) loc_os03g45320 12003.m101427 protein 3-isopropylmalate dehydrogenase…	AminoAcid metabolism	2.71764	2.6468	0.415239	0.457525	0.000455899	0.00227319	0.979097	1
XIC	b33.a3	GRMZM2G141931_P01	Zm00001d036401	nearly identical (1093) AT4G24190 | Symbols: SHD | SHD (SHEPHERD); ATP binding / unfolded protein binding | chr4:12551902-12555851 REVERSEnearly identical (1212) ENPL_HORVU Endoplasmin homolog precursor (GRP94 homolog) - Hordeum vulgare (Barley)nearly identical (1220) loc_os06g50300 12006.m31934 protein endoplasmin homolog precursor, putative, expressed seq=cds; coord=6:83777893..83783487:1; pare…	Folding, sorting and degradation	2.70303	2.56066	0.35333	0.371957	0	0	0.00758723	0.215971
XIC	c590.a1	GRMZM2G145850_P01	Zm00001d013425	weakly similar to ( 107) AT2G01755 | Symbols: | unknown protein | chr2:332249-332770 REVERSEweakly similar to ( 164) loc_os03g50530 12003.m101467 protein 3-deoxy-D-arabino-heptulosonate 7-phosphate, putative, expressed seq=cds; coord=5:10785625..10786560:1; parent_gene=GRMZM2G145850	notassigned	2.69779	2.75904	0	0	0	0	0.673319	1
XIC	c244.a1	GRMZM2G134797_P02	Zm00001d021526	moderately similar to ( 243) AT4G09320 | Symbols: NDPK1 | NDPK1; ATP binding / nucleoside diphosphate kinase | chr4:5923424-5924366 FORWARDmoderately similar to ( 298) NDK1_ORYSA Nucleoside diphosphate kinase 1 (EC 2.7.4.6) (Nucleoside diphosphate kinase I) (NDK I) (NDP kinase I) (NDPK I) - Oryza sativa (Rice)moderately similar to ( 298) loc_os07g30970 12007.m079686 protein nucleoside diphosphate…	Nucleotide metabolism	2.69137	1.71368	0	0	7.46898e-08	1.03708e-07	0.0674102	0.550216
SC	c100.a2	GRMZM2G102959_P01	Zm00001d018161	highly similar to ( 862) AT2G15620 | Symbols: NIR1, NIR, ATHNIR | NIR1 (NITRITE REDUCTASE 1); ferredoxin-nitrate reductase/ nitrite reductase (NO-forming) | chr2:6810552-6812666 FORWARDnearly identical (1051) NIR_MAIZE Ferredoxin--nitrite reductase, chloroplast precursor (EC 1.7.7.1) (Fragment) - Zea mays (Maize)highly similar to ( 974) loc_os01g25484 12001.m43466 protein ferredoxin--nitrite redu…	Energy metabolism	2.67936	2.79272	0.393034	0.435274	0.00529904	0.0185552	0.00886566	0.274076
SC	b37.a2	GRMZM2G312084_P01	NA	NA	NA	2.66683	2.28302	3.78403e-05	7.23378e-05	0.0605063	0.128874	0.45997	1
XIC	b57.a1	GRMZM2G090568_P01*	Zm00001d027511	highly similar to ( 867) AT4G35090 | Symbols: CAT2 | CAT2 (CATALASE 2); catalase | chr4:16701105-16703215 REVERSEnearly identical (1016) CATA2_MAIZE Catalase isozyme 2 (EC 1.11.1.6) - Zea mays (Maize)highly similar to ( 929) loc_os03g03910 12003.m34998 protein catalase-1, putative, expressed seq=cds; coord=1:7160376..7162590:-1; parent_gene=GRMZM2G090568	Folding, sorting and degradation	2.65925	3.11074	0	0	0	0	0.501832	0.95271
XIC	d1184.a1	GRMZM5G883741_P02	Zm00001d017522	highly similar to ( 704) AT4G20850 | Symbols: TPP2 | TPP2 (TRIPEPTIDYL PEPTIDASE II); tripeptidyl-peptidase | chr4:11160935-11169889 REVERSEhighly similar to ( 922) loc_os02g44520 12002.m09492 protein tripeptidyl-peptidase 2, putative, expressed seq=cds; coord=5:193174093..193205154:1; parent_gene=GRMZM5G883741	Folding, sorting and degradation	2.65212	6.39491	0.250074	0.267284	0	0	0.42382	0.928761
XIC	b45.a4	GRMZM2G076946_P02	Zm00001d041776	moderately similar to ( 484) AT2G44450 | Symbols: BGLU15 | BGLU15 (BETA GLUCOSIDASE 15); catalytic/ cation binding / hydrolase, hydrolyzing O-glycosyl compounds | chr2:18340966-18343744 FORWARDhighly similar to ( 798) BGLC_MAIZE Beta-glucosidase, chloroplast precursor (EC 3.2.1.21) (Gentiobiase) (Cellobiase) (Beta-D-glucoside glucohydrolase) - Zea mays (Maize)highly similar to ( 523) loc_os04g398…	Carbohydrate metabolism	2.65067	7.01915	6.62004e-12	1.07182e-11	0	0	0.0554295	0.529519
SC	b58.a2	GRMZM2G467338_P01	Zm00001d004564	nearly identical (1378) AT2G05710 | Symbols: | aconitate hydratase, cytoplasmic, putative / citrate hydro-lyase/aconitase, putative | chr2:2141591-2146350 FORWARDnearly identical (1446) ACOC_ORYSA Putative aconitate hydratase, cytoplasmic (EC 4.2.1.3) (Citrate hydro-lyase) (Aconitase) - Oryza sativa (Rice)nearly identical (1447) loc_os08g09200 12008.m05055 protein aconitate hydratase, cytoplasmic…	Carbohydrate metabolism	2.64896	2.16792	0	0	1.62131e-09	1.97107e-08	0.0640344	0.642052
XIC	c466.a1	GRMZM2G069708_P01	Zm00001d000123	moderately similar to ( 399) AT1G32220 | Symbols: | binding / catalytic/ coenzyme binding | chr1:11608038-11609591 FORWARDmoderately similar to ( 481) loc_os04g33060 12004.m35548 protein 3-beta hydroxysteroid dehydrogenase/isomerase family protein, expressed seq=cds; coord=2:60655289..60659433:-1; parent_gene=GRMZM2G069708	notassigned	2.64847	2.25025	0	0	4.40757e-06	5.62345e-06	0.33085	0.861373
XIC	c235.a1	GRMZM2G077206_P01	Zm00001d011154	moderately similar to ( 204) AT1G10370 | Symbols: GST30, ATGSTU17, GST30B, ERD9 | ERD9 (EARLY-RESPONSIVE TO DEHYDRATION 9); glutathione transferase | chr1:3397274-3398273 REVERSEmoderately similar to ( 245) GSTU6_ORYSA Probable glutathione S-transferase GSTU6 (EC 2.5.1.18) (28 kDa cold-induced protein) - Oryza sativa (Rice)moderately similar to ( 261) loc_os10g38495 12010.m65371 protein glutathio…	misc	2.64417	3.07422	0	0	0	0	0.417997	0.928761
XIC	d1425.a1	GRMZM2G084521_P01*	Zm00001d014732	moderately similar to ( 302) AT2G29960 | Symbols: CYP5, ATCYP5, CYP19-4 | CYP5 (CYCLOPHILIN 5); peptidyl-prolyl cis-trans isomerase | chr2:12769183-12770528 REVERSEmoderately similar to ( 221) CYPH_BRANA Peptidyl-prolyl cis-trans isomerase (EC 5.2.1.8) (PPIase) (Rotamase) (Cyclophilin) (Cyclosporin A-binding protein) - Brassica napus (Rape)moderately similar to ( 317) loc_os06g49480 12006.m32182 …	Cell growth and death	2.64324	2.36629	0	0	0	0	0.564482	0.963635
XIC	c959.a2	GRMZM2G479423_P01*	NA	moderately similar to ( 246) AT2G37770 | Symbols: | aldo/keto reductase family protein | chr2:15834888-15836659 FORWARDweakly similar to ( 147) NADO1_ORYSA Probable NAD(P)H-dependent oxidoreductase 1 (EC 1.1.1.-) - Oryza sativa (Rice)moderately similar to ( 310) loc_os01g62870 12001.m43275 protein aldose reductase, putative, expressed seq=cds; coord=3:179640066..179643994:-1; parent_gene=GRMZM2G4…	Carbohydrate metabolism	2.64033	2.60691	0	0	6.16075e-10	9.30398e-10	0.632138	0.990041
XIC	d1000.a1	GRMZM2G393671_P01	Zm00001d022112	weakly similar to ( 104) AT2G31670 | Symbols: | FUNCTIONS IN: molecular_function unknown; INVOLVED IN: biological_process unknown; LOCATED IN: peroxisome, chloroplast stroma, chloroplast; EXPRESSED IN: 22 plant structures; EXPRESSED DURING: 16 growth stages; CONTAINS InterPro DOMAIN/s: Stress responsive alpha-beta barrel (InterPro:IPR013097), Dimeric alpha-beta barrel (InterPro:IPR011008); BEST A…	notassigned	2.63692	3.3946	0.000750563	0.000942323	0	0	0.58595	0.97627
XIC	c666.a1	GRMZM2G000256_P01*	Zm00001d011362	moderately similar to ( 325) AT5G11450 | Symbols: | oxygen-evolving complex-related | chr5:3654475-3656357 FORWARDmoderately similar to ( 427) loc_os01g43070 12001.m42679 protein expressed protein seq=cds; coord=8:144233313..144236535:1; parent_gene=GRMZM2G000256	Energy metabolism	2.63661	3.22682	0	0	1.03861e-10	1.63118e-10	0.99837	1
XIC	c354.a1	GRMZM2G024823_P01*	NA	moderately similar to ( 416) AT5G46800 | Symbols: BOU | BOU (A BOUT DE SOUFFLE); binding / transporter | chr5:18988779-18989810 REVERSEmoderately similar to ( 494) loc_os10g42299 12010.m065349 protein mitochondrial carnitine/acylcarnitine carrier-like protein, putative, expressed seq=cds; coord=1:99171449..99175538:1; parent_gene=GRMZM2G024823	Membrane transport	2.63488	2.3085	0.208402	0.224269	1.00431e-12	1.73547e-12	0.304556	0.837117
XIC	c480.a1	GRMZM2G416388_P01*	Zm00001d033925	moderately similar to ( 280) AT5G10860 | Symbols: | CBS domain-containing protein | chr5:3429173-3430142 REVERSEmoderately similar to ( 333) loc_os03g52690 12003.m101601 protein CBS domain protein, putative, expressed seq=cds; coord=1:273865741..273870770:-1; parent_gene=GRMZM2G416388	notassigned	2.63465	4.76105	0.000206879	0.000266654	1.11022e-16	2.24905e-16	0.123675	0.62553
SC	b72.a2	GRMZM2G466833_P01	Zm00001d044042	highly similar to ( 505) AT1G53240 | Symbols: | malate dehydrogenase (NAD), mitochondrial | chr1:19854966-19856802 REVERSEhighly similar to ( 508) MDHM_FRAAN Malate dehydrogenase, mitochondrial precursor (EC 1.1.1.37) - Fragaria ananassa (Strawberry)highly similar to ( 587) loc_os01g46070 12001.m10806 protein malate dehydrogenase, mitochondrial precursor, putative, expressed seq=cds; coord=3:2138…	Carbohydrate metabolism	2.63388	1.55422	1.59282e-07	3.85554e-07	0.596251	0.69684	0.264778	1
XIC	c628.a1	GRMZM2G047042_P02*	Zm00001d041179	moderately similar to ( 233) AT2G43950 | Symbols: OEP37 | OEP37; ion channel | chr2:18200830-18202644 REVERSEmoderately similar to ( 380) loc_os12g12370 12012.m05211 protein outer envelope protein, putative, expressed seq=cds; coord=3:96221530..96237939:1; parent_gene=GRMZM2G047042	notassigned	2.63036	2.94106	0.719649	0.73424	0	0	0.00576259	0.185616
XIC	c726.a1	GRMZM2G051782_P01	Zm00001d048065	highly similar to ( 798) AT5G19780 | Symbols: TUA5 | TUA5; structural constituent of cytoskeleton | chr5:6687212-6688926 FORWARDhighly similar to ( 796) TBA6_MAIZE Tubulin alpha-6 chain (Alpha-6 tubulin) - Zea mays (Maize)highly similar to ( 817) loc_os03g11970 12003.m06649 protein tubulin alpha-2 chain, putative, expressed seq=cds; coord=9:146299403..146305484:1; parent_gene=GRMZM2G051782	Cell motility	2.62601	2.85621	0	0	0	0	0.465672	0.939841
SC	b30.a8	GRMZM2G140545_P01	Zm00001d052796	moderately similar to ( 365) AT1G78300 | Symbols: GRF2, 14-3-3OMEGA, GF14 OMEGA | GRF2 (GENERAL REGULATORY FACTOR 2); protein binding / protein phosphorylated amino acid binding | chr1:29461883-29463052 FORWARDmoderately similar to ( 403) 14331_ORYSA 14-3-3-like protein GF14-A (G-box factor 14-3-3 homolog A) - Oryza sativa (Rice)moderately similar to ( 403) loc_os08g37490 12008.m07735 protein 14-…	Signal transduction	2.62189	3.09693	0.0770726	0.0979936	0.093075	0.179194	0.298812	1
SC	c413.a1	GRMZM2G088847_P01*	Zm00001d052321	weakly similar to ( 190) AT5G01650 | Symbols: | macrophage migration inhibitory factor family protein / MIF family protein | chr5:243067-244033 REVERSEmoderately similar to ( 219) loc_os12g01680 12012.m04171 protein macrophage migration inhibitory factor, putative, expressed seq=cds; coord=4:183699409..183701935:1; parent_gene=GRMZM2G088847	notassigned	2.62063	1.85266	1.14496e-10	3.55992e-10	0.700723	0.781167	0.0646799	0.642052
XIC	c558.a1	AC198353.5_FGP001	Zm00001d005973	moderately similar to ( 402) AT2G35770 | Symbols: scpl28 | scpl28 (serine carboxypeptidase-like 28); serine-type carboxypeptidase | chr2:15034179-15036497 REVERSEmoderately similar to ( 400) CBP23_HORVU Serine carboxypeptidase II-3 precursor (EC 3.4.16.6) (CP-MII.3) [Contains: Serine carboxypeptidase II-3 chain A; Serine carboxypeptidase II-3 chain B] - Hordeum vulgare (Barley)moderately similar …	Folding, sorting and degradation	2.61983	9.61229	1.55431e-15	2.73472e-15	0	0	0.029355	0.38224
XIC	c108.a1	GRMZM2G353444_P02	Zm00001d039542	moderately similar to ( 456) AT1G06800 | Symbols: | lipase class 3 family protein | chr1:2090109-2091443 REVERSEmoderately similar to ( 453) loc_os05g32380 12005.m07471 protein triacylglycerol lipase, putative, expressed seq=cds; coord=3:8540989..8542960:1; parent_gene=GRMZM2G353444	Lipid metabolism	2.6118	5.59726	0	0	0	0	0.293059	0.828263
XIC	c556.a1	GRMZM2G056870_P01	Zm00001d027688	moderately similar to ( 450) AT1G53850 | Symbols: PAE1 | PAE1; endopeptidase/ peptidase/ threonine-type endopeptidase | chr1:20104131-20105792 REVERSEmoderately similar to ( 463) PSA5_ORYSA Proteasome subunit alpha type 5 (EC 3.4.25.1) (20S proteasome alpha subunit E) (20S proteasome subunit alpha-5) - Oryza sativa (Rice)moderately similar to ( 463) loc_os11g40140 12011.m28848 protein proteasome …	Folding, sorting and degradation	2.6113	1.78213	0	0	3.26168e-09	4.77671e-09	0.620614	0.990041
XIC	c399.a1	GRMZM2G095333_P01	Zm00001d046940	moderately similar to ( 202) AT5G45680 | Symbols: ATFKBP13, FKBP13 | FK506-binding protein 1 (FKBP13) | chr5:18530894-18532128 FORWARDvery weakly similar to (98.6) FKB15_VICFA FK506-binding protein 2 precursor (EC 5.2.1.8) (Peptidyl-prolyl cis-trans isomerase) (PPIase) (Rotamase) (15 kDa FKBP) (FKBP-15) - Vicia faba (Broad bean)moderately similar to ( 269) loc_os06g45340 12006.m091754 protein FKB…	Membrane transport	2.61015	3.11055	0.522203	0.543368	0	0	0.278991	0.809207
XIC	d1050.a1	GRMZM2G039588_P03	Zm00001d001999	moderately similar to ( 469) AT5G57330 | Symbols: | aldose 1-epimerase family protein | chr5:23218392-23220664 FORWARDhighly similar to ( 576) loc_os04g56290 12004.m35496 protein apospory-associated protein C, putative, expressed seq=cds; coord=2:4174237..4178923:-1; parent_gene=GRMZM2G039588	Carbohydrate metabolism	2.60114	1.91401	0.713952	0.729019	9.32587e-15	1.76686e-14	0.103832	0.616007
XIC	c689.a1	GRMZM2G047720_P01	Zm00001d037323	weakly similar to ( 165) AT4G01150 | Symbols: | unknown protein | chr4:493692-494379 FORWARDmoderately similar to ( 204) loc_os06g15400 12006.m06253 protein threonine endopeptidase, putative, expressed seq=cds; coord=6:117103987..117105456:-1; parent_gene=GRMZM2G047720	Folding, sorting and degradation	2.59205	2.64308	1.63815e-05	2.19936e-05	4.34435e-07	5.7894e-07	0.631634	0.990041
XIC	c263.a1	GRMZM2G162486_P01	Zm00001d047765	moderately similar to ( 300) AT5G02790 | Symbols: | In2-1 protein, putative | chr5:632877-634858 FORWARDmoderately similar to ( 339) IN21_MAIZE IN2-1 protein - Zea mays (Maize)moderately similar to ( 422) loc_os03g17470 12003.m07174 protein IN2-1 protein, putative, expressed seq=cds; coord=9:138752306..138754760:1; parent_gene=GRMZM2G162486	misc	2.59164	2.96319	0	0	0	0	0.0649539	0.5483
XIC	d1020.a1	GRMZM2G179981_P01	Zm00001d015956	moderately similar to ( 495) AT5G19440 | Symbols: | cinnamyl-alcohol dehydrogenase, putative (CAD) | chr5:6556493-6558123 FORWARDmoderately similar to ( 219) DFRA_DIACA Dihydroflavonol-4-reductase (EC 1.1.1.219) (DFR) (Dihydrokaempferol 4-reductase) - Dianthus caryophyllus (Carnation) (Clove pink)highly similar to ( 567) loc_os01g34480 12001.m150871 protein dihydroflavonol-4-reductase, putative, …	Carbohydrate metabolism	2.57817	3.16337	0	0	2.84478e-07	3.84397e-07	0.892772	1
XIC	c430.a1	GRMZM2G155753_P01*	Zm00001d032127	moderately similar to ( 278) AT5G13410 | Symbols: | immunophilin / FKBP-type peptidyl-prolyl cis-trans isomerase family protein | chr5:4299830-4301706 REVERSEmoderately similar to ( 330) loc_os07g04160 12007.m29054 protein FK506 binding protein, putative, expressed seq=cds; coord=1:210841573..210846880:1; parent_gene=GRMZM2G155753	Folding, sorting and degradation	2.57376	2.71896	0.0533393	0.0601262	0	0	0.055669	0.529519
XIC	d1331.a1	GRMZM2G141241_P01	Zm00001d046628	moderately similar to ( 237) AT1G21065 | Symbols: | unknown protein | chr1:7374210-7375644 FORWARDmoderately similar to ( 281) loc_os06g43140 12006.m08844 protein expressed protein seq=cds; coord=9:96198332..96201868:-1; parent_gene=GRMZM2G141241	notassigned	2.57371	3.94289	0	0	0	0	0.0854401	0.58552
XIC	c107.a1	GRMZM5G808939_P01	NA	nearly identical (1006) ATCG00680 | Symbols: PSBB | encodes for CP47, subunit of the photosystem II reaction center. | chrC:72371-73897 FORWARDnearly identical (1036) PSBB_SACOF Photosystem II P680 chlorophyll A apoprotein (CP-47 protein) - Saccharum officinarum (Sugarcane)nearly identical (1020) loc_osp1g00600 11562.m00051 protein photosystem II 47 kDa protein seq=cds; coord=Pt:70706..72490:1; p…	Energy metabolism	2.57193	2.70643	0.000543174	0.000686746	0.0464057	0.0493478	0.510381	0.95375
XIC	d1623.a1	GRMZM2G401934_P03	Zm00001d041829	highly similar to ( 659) AT1G22940 | Symbols: TH1, TH-1, THIE | TH1 (THIAMINE REQUIRING 1); hydroxymethylpyrimidine kinase/ phosphomethylpyrimidine kinase/ thiamin-phosphate diphosphorylase | chr1:8122384-8124908 FORWARDhighly similar to ( 818) loc_os12g09000 12012.m26740 protein phosphomethylpyrimidine kinase/thiamin-phosphate pyrophosphorylase, putative, expressed seq=cds; coord=3:138776830..13…	Metabolism of cofactors and vitamins	2.56079	3.23873	0	0	0	0	0.768439	1
XIC	c557.a1	GRMZM2G093405_P01*	Zm00001d039387	moderately similar to ( 257) AT1G17100 | Symbols: | SOUL heme-binding family protein | chr1:5844766-5845539 FORWARDmoderately similar to ( 357) loc_os01g11230 12001.m150508 protein heme-binding protein 2, putative, expressed seq=cds; coord=3:3887574..3888713:1; parent_gene=GRMZM2G093405	notassigned	2.55979	4.91393	0	0	0	0	0.810097	1
XIC	c999.a1	GRMZM2G084812_P01	NA	weakly similar to ( 151) AT5G55730 | Symbols: FLA1 | FLA1 (FASCICLIN-LIKE ARAB INOGALACTAN 1) | chr5:22558375-22560392 REVERSEmoderately similar to ( 267) loc_os08g23180 12008.m06339 protein fasciclin-like arabinogalactan protein 8 precursor, putative, expressed seq=cds; coord=6:124803945..124805261:1; parent_gene=GRMZM2G084812	Carbohydrate metabolism	2.54956	3.74848	2.88658e-15	5.01563e-15	0	0	0.84441	1
XIC	c644.a1	GRMZM2G051697_P01	Zm00001d052519	highly similar to ( 550) AT5G22620 | Symbols: | phosphoglycerate/bisphosphoglycerate mutase family protein | chr5:7517731-7520223 REVERSEhighly similar to ( 731) loc_os11g05260 12011.m28727 protein phosphoglycerate mutase, putative, expressed seq=cds; coord=4:188315558..188318300:-1; parent_gene=GRMZM2G051697	Carbohydrate metabolism	2.54806	3.96401	2.66454e-15	4.65554e-15	0	0	0.59779	0.984286
SC	b36.a3	GRMZM2G143664_P01	NA	NA	NA	2.54759	2.29047	5.2131e-09	1.43162e-08	0.375072	0.497651	0.371714	1
SC	b88.a2	GRMZM2G009048_P01	Zm00001d023713	weakly similar to ( 164) AT5G64040 | Symbols: PSAN | PSAN; calmodulin binding | chr5:25628690-25629409 REVERSEweakly similar to ( 183) PSAN_HORVU Photosystem I reaction center subunit N, chloroplast precursor (PSI-N) - Hordeum vulgare (Barley)weakly similar to ( 184) loc_os12g08770 12012.m04863 protein photosystem I reaction center subunit N, chloroplast precursor, putative, expressed seq=cds; co…	Energy metabolism	2.54	2.08665	0	0	0.628968	0.727854	1	1
XIC	c568.a1	GRMZM5G852016_P01	NA	NA	NA	2.53638	2.17785	0	0	0.0869635	0.0911668	0.923022	1
SC	c286.a1	GRMZM2G002825_P01	Zm00001d012966	weakly similar to ( 177) AT5G59890 | Symbols: ADF4, ATADF4 | ADF4 (ACTIN DEPOLYMERIZING FACTOR 4); actin binding | chr5:24123107-24123596 FORWARDmoderately similar to ( 275) ADF3_MAIZE Actin-depolymerizing factor 3 (ADF 3) (ZmABP3) (ZmADF3) - Zea mays (Maize)moderately similar to ( 223) loc_os03g60590 12003.m101135 protein actin-depolymerizing factor 3, putative, expressed seq=cds; coord=5:236232…	Cell motility	2.53434	2.71413	0	0	0.122609	0.221987	0.496178	1
XIC	c829.a1	GRMZM2G037177_P01	Zm00001d022324	moderately similar to ( 377) AT1G47260 | Symbols: APFI, GAMMA CA2 | GAMMA CA2 (GAMMA CARBONIC ANHYDRASE 2); carbonate dehydratase | chr1:17321384-17323347 REVERSEmoderately similar to ( 447) loc_os12g07220 12012.m04711 protein protein yrdA, putative, expressed seq=cds; coord=7:169836954..169839970:-1; parent_gene=GRMZM2G037177	Energy metabolism	2.52536	2.15783	1.64666e-06	2.30166e-06	7.32946e-10	1.10029e-09	0.458581	0.939841
XIC	c561.a1	GRMZM2G048085_P01*	Zm00001d014816	weakly similar to ( 141) AT4G35770 | Symbols: SEN1, ATSEN1, DIN1 | SEN1 (SENESCENCE 1) | chr4:16945073-16945964 FORWARDweakly similar to ( 142) DIN1_RAPSA Senescence-associated protein DIN1 - Raphanus sativus (Radish)weakly similar to ( 189) loc_os06g50930 12006.m09617 protein senescence-associated protein DIN1, putative, expressed seq=cds; coord=5:62594325..62596238:-1; parent_gene=GRMZM2G048085	Signaling molecules and interactions	2.51953	2.10392	0	0	2.5917e-12	4.38811e-12	0.253104	0.779325
XIC	d1113.a1	GRMZM2G327595_P01	Zm00001d007073	moderately similar to ( 474) AT3G63470 | Symbols: scpl40 | scpl40 (serine carboxypeptidase-like 40); serine-type carboxypeptidase | chr3:23438561-23440862 FORWARDhighly similar to ( 726) CBP23_HORVU Serine carboxypeptidase II-3 precursor (EC 3.4.16.6) (CP-MII.3) [Contains: Serine carboxypeptidase II-3 chain A; Serine carboxypeptidase II-3 chain B] - Hordeum vulgare (Barley)highly similar to ( 726…	Folding, sorting and degradation	2.51913	4.187	4.23875e-09	6.44782e-09	0	0	0.00645118	0.198515
XIC	c750.a1	GRMZM2G000622_P01	Zm00001d033775	nearly identical (1882) AT1G74260 | Symbols: PUR4 | PUR4 (purine biosynthesis 4); ATP binding / catalytic/ phosphoribosylformylglycinamidine synthase | chr1:27923005-27927764 REVERSEnearly identical (2323) loc_os01g66500 12001.m12758 protein phosphoribosylformylglycinamidine synthase, chloroplast precursor, putative, expressed seq=cds; coord=1:268558195..268564501:-1; parent_gene=GRMZM2G000622	Nucleotide metabolism	2.51757	2.93965	0	0	1.56627e-06	2.04607e-06	0.134208	0.651188
XIC	c157.a1	GRMZM2G700683_P01	Zm00001d011192	nearly identical (1751) AT1G29900 | Symbols: CARB | CARB (CARBAMOYL PHOSPHATE SYNTHETASE B); ATP binding / carbamoyl-phosphate synthase/ catalytic | chr1:10468164-10471976 FORWARDnearly identical (2016) loc_os01g38970 12001.m10177 protein carbamoyl-phosphate synthase large chain, putative, expressed seq=cds; coord=8:138510107..138515042:1; parent_gene=GRMZM2G700683	Nucleotide metabolism	2.51488	2.42647	0	0	0.00171007	0.00194685	0.999972	1
XIC	c432.a1	GRMZM2G122937_P01*	Zm00001d002842	weakly similar to ( 110) AT5G23750 | Symbols: | remorin family protein | chr5:8010004-8011453 REVERSEweakly similar to ( 111) REMO_SOLTU Remorin (pp34) - Solanum tuberosum (Potato)weakly similar to ( 149) loc_os04g45070 12004.m35179 protein remorin, putative, expressed seq=cds; coord=2:22990515..22995670:1; parent_gene=GRMZM2G122937	Transcription	2.50459	4.7236	0.00784656	0.00930346	0	0	0.432417	0.931827
XIC	c385.a1	CUFF.60246_30328980_30330290_PAVcov_664_scaffold9861|Frame3|Orf*	NA	moderately similar to ( 317) AT1G54780 | Symbols: | thylakoid lumen 18.3 kDa protein | chr1:20439533-20440953 FORWARDmoderately similar to ( 364) loc_os05g33280 12005.m07560 protein beta-propeller domains of methanol dehydrogenase type, putative, expressed seq=cds; coord=8:88438772..88440193:1; parent_gene=GRMZM2G025882	Energy metabolism	2.50205	2.64232	0	0	3.38618e-14	6.3015e-14	0.776695	1
XIC	c137.a1	GRMZM2G084279_P01	Zm00001d016542	moderately similar to ( 295) AT1G15140 | Symbols: | oxidoreductase NAD-binding domain-containing protein | chr1:5210642-5212137 REVERSEmoderately similar to ( 242) K502_ACTCH Fruit protein PKIWI502 - Actinidia chinensis (Kiwi) (Yangtao)moderately similar to ( 366) loc_os02g22260 12002.m33669 protein fruit protein PKIWI502, putative, expressed seq=cds; coord=5:162834761..162837541:1; parent_gene=G…	Energy metabolism	2.49792	2.65905	0	0	0	0	0.103265	0.616007
XIC	d1305.a1	AC234528.1_FGP005	Zm00001d031929	highly similar to ( 911) AT3G23940 | Symbols: | dehydratase family | chr3:8648780-8652323 FORWARDnearly identical (1087) loc_os08g44530 12008.m08426 protein dihydroxy-acid dehydratase, putative, expressed seq=cds; coord=1:204259324..204264422:-1; parent_gene=AC234528.1_FG005	notassigned	2.49545	2.01335	0	0	1.26923e-11	2.06558e-11	0.0955238	0.603751
XIC	d2038.a1	GRMZM2G141510_P01	Zm00001d006929	highly similar to ( 587) AT5G49650 | Symbols: | xylulose kinase, putative | chr5:20152898-20155574 FORWARDhighly similar to ( 746) loc_os07g44660 12007.m08687 protein xylulose kinase, putative, expressed seq=cds; coord=2:212802942..212807188:1; parent_gene=GRMZM2G141510	Carbohydrate metabolism	2.49384	6.87381	3.35287e-14	5.73866e-14	0	0	0.948327	1
XIC	b58.a1	GRMZM5G858454_P02	Zm00001d024952	nearly identical (1357) AT2G05710 | Symbols: | aconitate hydratase, cytoplasmic, putative / citrate hydro-lyase/aconitase, putative | chr2:2141591-2146350 FORWARDnearly identical (1425) ACOC_ORYSA Putative aconitate hydratase, cytoplasmic (EC 4.2.1.3) (Citrate hydro-lyase) (Aconitase) - Oryza sativa (Rice)nearly identical (1427) loc_os08g09200 12008.m05055 protein aconitate hydratase, cytoplasmic…	Carbohydrate metabolism	2.49287	2.44615	0	0	0	0	0.928104	1
SC	c271.a1	GRMZM2G009320_P01*	Zm00001d022107	weakly similar to ( 148) AT2G04039 | Symbols: | unknown protein | chr2:1333464-1334457 FORWARD seq=cds; coord=7:164954304..164956841:1; parent_gene=GRMZM2G009320	notassigned	2.49116	1.986	0	0	0.722855	0.798091	0.636797	1
XIC	c991.a1	GRMZM2G420743_P01	Zm00001d018629	very weakly similar to (89.0) AT5G42510 | Symbols: | disease resistance-responsive family protein | chr5:16998268-16998816 REVERSEmoderately similar to ( 236) loc_os08g28790 12008.m06884 protein dirigent-like protein pDIR3, putative, expressed seq=cds; coord=7:1266505..1269350:-1; parent_gene=GRMZM2G420743	Environmental adaptation	2.4867	7.80791	1.31006e-14	2.25453e-14	0	0	0.255818	0.779325
XIC	c278.a1	GRMZM2G072034_P01	Zm00001d017199	moderately similar to ( 291) AT5G58070 | Symbols: ATTIL, TIL | TIL (TEMPERATURE-INDUCED LIPOCALIN); binding / transporter | chr5:23500512-23501156 REVERSEmoderately similar to ( 339) loc_os02g39930 12002.m09079 protein OsTIL-1 - Oryza sativa Temperature-induced lipocalin-1, expressed seq=cds; coord=5:184040573..184041793:-1; parent_gene=GRMZM2G072034	Membrane transport	2.4743	2.52042	6.40963e-10	9.94244e-10	4.14846e-12	6.93063e-12	0.0183266	0.349083
XIC	c159.a1	GRMZM2G436710_P01	Zm00001d013918	moderately similar to ( 280) AT5G53490 | Symbols: | thylakoid lumenal 17.4 kDa protein, chloroplast | chr5:21723488-21724621 REVERSEmoderately similar to ( 356) loc_os10g35810 12010.m06399 protein uncharacterized low-complexity proteins, putative, expressed seq=cds; coord=5:24215306..24218389:1; parent_gene=GRMZM2G436710	Energy metabolism	2.46046	2.72761	0	0	2.70006e-12	4.56543e-12	0.619436	0.990041
XIC	c983.a1	GRMZM2G087435_P01	Zm00001d013277	weakly similar to ( 158) AT1G05385 | Symbols: | photosystem II 11 kDa protein-related | chr1:1582747-1583648 REVERSEmoderately similar to ( 206) loc_os03g53640 12003.m10335 protein expressed protein seq=cds; coord=5:7442570..7443838:1; parent_gene=GRMZM2G087435	Energy metabolism	2.45615	6.26706	4.13447e-08	6.09749e-08	0	0	0.635101	0.990041
SC	b95.a1	GRMZM2G094497_P01	Zm00001d046336	highly similar to ( 910) AT4G38510 | Symbols: | vacuolar ATP synthase subunit B, putative / V-ATPase B subunit, putative / vacuolar proton pump B subunit, putative / V-ATPase 57 kDa subunit, putative | chr4:18011155-18014789 REVERSEhighly similar to ( 947) VATB1_HORVU Vacuolar ATP synthase subunit B isoform 1 (EC 3.6.3.14) (V-ATPase B subunit 1) (Vacuolar proton pump B subunit 1) - Hordeum vulgar…	Membrane transport	2.44999	1.58112	0	0	0.142115	0.250437	0.337563	1
XIC	c170.a1	GRMZM2G015285_P01	Zm00001d007581	moderately similar to ( 270) AT3G23400 | Symbols: | plastid-lipid associated protein PAP / fibrillin family protein | chr3:8376636-8378225 REVERSEmoderately similar to ( 306) loc_os11g38260 12011.m07673 protein harpin binding protein 1, putative, expressed seq=cds; coord=2:228121659..228123443:1; parent_gene=GRMZM2G015285	Cell motility	2.43425	2.15267	0	0	0	0	0.14069	0.667461
XIC	d1159.a1	GRMZM2G177508_P01	Zm00001d027456	weakly similar to ( 165) AT4G01150 | Symbols: | unknown protein | chr4:493692-494379 FORWARDmoderately similar to ( 216) loc_os06g15400 12006.m06253 protein threonine endopeptidase, putative, expressed seq=cds; coord=1:5589065..5590533:-1; parent_gene=GRMZM2G177508	notassigned	2.42391	3.28525	0.34601	0.364863	1.44126e-09	2.14061e-09	0.322583	0.854635
XIC	c856.a1	GRMZM2G009785_P01*	Zm00001d015985	highly similar to ( 567) AT4G32770 | Symbols: VTE1, ATSDX1 | VTE1 (VITAMIN E DEFICIENT 1); tocopherol cyclase | chr4:15804981-15807790 FORWARDhighly similar to ( 868) TOCC_MAIZE Probable tocopherol cyclase, chloroplast precursor (Sucrose export defective 1) - Zea mays (Maize)highly similar to ( 741) loc_os02g17650 12002.m33638 protein tocopherol cyclase, chloroplast precursor, putative, expressed…	Biosynthesis of other secondary metabolites	2.42295	2.59742	0	0	0	0	0.294653	0.828263
SC	c232.a1	GRMZM2G111477_P01	NA	moderately similar to ( 317) AT3G23990 | Symbols: HSP60, HSP60-3B | HSP60 (HEAT SHOCK PROTEIN 60); ATP binding | chr3:8669013-8672278 FORWARDmoderately similar to ( 342) CH61_MAIZE Chaperonin CPN60-1, mitochondrial precursor (HSP60-1) - Zea mays (Maize)moderately similar to ( 333) loc_os10g32550 12010.m06092 protein chaperonin CPN60-1, mitochondrial precursor, putative, expressed seq=cds; coord=5…	Folding, sorting and degradation	2.42017	2.25519	0.831877	0.856414	0.187973	0.312902	0.796292	1
XIC	b24.a2	GRMZM2G407996_P01*	Zm00001d050969	highly similar to ( 655) AT4G20360 | Symbols: ATRAB8D, ATRABE1B | ATRABE1B (ARABIDOPSIS RAB GTPASE HOMOLOG E1B); GTP binding / GTPase/ translation elongation factor | chr4:10990036-10991466 FORWARDhighly similar to ( 669) EFTU1_SOYBN Elongation factor Tu, chloroplast precursor (EF-Tu) - Glycine max (Soybean)highly similar to ( 731) loc_os02g38210 12002.m08909 protein elongation factor Tu, chlorop…	Translation	2.41872	2.25543	0	0	1.18483e-12	2.03901e-12	0.195952	0.755247
XIC	b11.a3	GRMZM2G168143_P01	Zm00001d045575	highly similar to ( 514) AT5G66190 | Symbols: ATLFNR1 | FNR1 (FERREDOXIN-NADP(+)-OXIDOREDUCTASE 1); NADPH dehydrogenase/ electron transporter, transferring electrons within the cyclic electron transport pathway of photosynthesis/ electron transporter, transferring electrons within the noncyclic electron transp | chr5:26451203-26452616 REVERSEhighly similar to ( 530) FENR1_ORYSA Ferredoxin--NADP r…	Energy metabolism	2.41197	2.30617	0.17341	0.187899	2.91633e-12	4.91789e-12	0.476609	0.940918
XIC	c216.a1	GRMZM2G047592_P02	Zm00001d020108	moderately similar to ( 414) AT5G66530 | Symbols: | aldose 1-epimerase family protein | chr5:26553821-26555575 REVERSEhighly similar to ( 548) loc_os09g15820 12009.m04843 protein apospory-associated protein C, putative, expressed seq=cds; coord=7:89432642..89436007:-1; parent_gene=GRMZM2G047592	Carbohydrate metabolism	2.41003	2.49912	4.21663e-13	7.06327e-13	0	0	0.0749844	0.56508
XIC	d1263.a1	GRMZM2G130440_P02	Zm00001d005818	highly similar to ( 769) AT1G54100 | Symbols: ALDH7B4 | ALDH7B4 (Aldehyde Dehydrogenase 7B4); 3-chloroallyl aldehyde dehydrogenase/ oxidoreductase | chr1:20195435-20198853 REVERSEhighly similar to ( 785) AL7A1_MALDO Aldehyde dehydrogenase family 7 member A1 (EC 1.2.1.3) (Antiquitin-1) (Matured fruit 60 kDa protein) (MF-60) - Malus domestica (Apple) (Malus sylvestris)highly similar to ( 902) loc_o…	Carbohydrate metabolism	2.40913	2.9463	0	0	0	0	0.0289796	0.381409
SC	a4.a3	GRMZM2G083364_P01	NA	moderately similar to ( 270) ATCG00490 | Symbols: RBCL | large subunit of RUBISCO. Protein is tyrosine-phosphorylated and its phosphorylation state is modulated in response to ABA in Arabidopsis thaliana seeds. | chrC:54958-56397 FORWARDmoderately similar to ( 288) RBL_MAIZE Ribulose bisphosphate carboxylase large chain precursor (EC 4.1.1.39) (RuBisCO large subunit) - Zea mays (Maize)moderately …	Energy metabolism	2.40675	2.54143	0.475068	0.519296	0.399338	0.520583	0.164218	0.955288
XIC	b89.a2	GRMZM2G112149_P01*	Zm00001d013644	nearly identical (1299) AT5G17920 | Symbols: ATCIMS | ATMS1; 5-methyltetrahydropteroyltriglutamate-homocysteine S-methyltransferase/ methionine synthase | chr5:5935771-5939195 FORWARDnearly identical (1312) METE_CATRO 5-methyltetrahydropteroyltriglutamate--homocysteine methyltransferase (EC 2.1.1.14) (Vitamin-B12-independent methionine synthase isozyme) (Cobalamin-independent methionine synthase …	AminoAcid metabolism	2.40243	3.93555	0	0	0	0	0.763618	1
XIC	d1309.a1	GRMZM2G073077_P02	Zm00001d024319	moderately similar to ( 386) AT1G64520 | Symbols: RPN12a | RPN12a (Regulatory Particle non-ATPase 12a); peptidase | chr1:23956459-23958120 FORWARDmoderately similar to ( 463) loc_os07g25420 12007.m29149 protein 26S proteasome non-ATPase regulatory subunit 8, putative, expressed seq=cds; coord=10:65096597..65099614:1; parent_gene=GRMZM2G073077	Folding, sorting and degradation	2.40041	3.12679	1.35754e-05	1.83042e-05	6.38083e-09	9.25847e-09	0.47405	0.940196
SC	b29.a4	GRMZM2G453617_P01	NA	NA	NA	2.39316	2.20643	0.00854822	0.0125668	0.86942	0.90978	0.784571	1
XIC	c513.a2	GRMZM2G134668_P02	Zm00001d003857	highly similar to ( 653) AT5G61790 | Symbols: CNX1, ATCNX1 | calnexin 1 (CNX1) | chr5:24827394-24829642 REVERSEhighly similar to ( 672) CALX_SOYBN Calnexin homolog precursor - Glycine max (Soybean)highly similar to ( 786) loc_os04g32950 12004.m78935 protein calnexin homolog precursor, putative, expressed seq=cds; coord=2:61490885..61494711:-1; parent_gene=GRMZM2G134668	Signal transduction	2.39128	2.3876	0.0460245	0.0522082	2.22045e-16	4.40587e-16	0.0226589	0.349083
XIC	c113.a1	GRMZM2G326111_P01	Zm00001d016660	moderately similar to ( 266) AT2G21130 | Symbols: | peptidyl-prolyl cis-trans isomerase / cyclophilin (CYP2) / rotamase | chr2:9055619-9056143 REVERSEmoderately similar to ( 321) CYPH_MAIZE Peptidyl-prolyl cis-trans isomerase (EC 5.2.1.8) (PPIase) (Rotamase) (Cyclophilin) (Cyclosporin A-binding protein) - Zea mays (Maize)moderately similar to ( 283) loc_os02g02890 12002.m05639 protein peptidyl-pr…	Cell growth and death	2.38983	1.93357	0	0	4.81705e-07	6.40576e-07	0.999971	1
XIC	c648.a1	GRMZM2G307600_P01	Zm00001d041191	moderately similar to ( 302) AT1G29700 | Symbols: | unknown protein | chr1:10385196-10386906 REVERSEmoderately similar to ( 400) loc_os12g44370 12012.m08208 protein expressed protein seq=cds; coord=3:94799422..94801527:-1; parent_gene=GRMZM2G307600	notassigned	2.3883	2.84939	1.5491e-05	2.08424e-05	2.77945e-07	3.75972e-07	0.231696	0.771159
SC	c186.a2	GRMZM2G024607_P01	Zm00001d012168	moderately similar to ( 397) AT1G65260 | Symbols: PTAC4 | PTAC4 (PLASTID TRANSCRIPTIONALLY ACTIVE4) | chr1:24236329-24240428 FORWARDhighly similar to ( 506) IM30_ORYSA Probable membrane-associated 30 kDa protein, chloroplast precursor - Oryza sativa (Rice)highly similar to ( 506) loc_os01g67000 12001.m12805 protein membrane-associated 30 kDa protein, chloroplast precursor, putative, expressed seq…	Transcription	2.38784	2.10728	0	0	0.284381	0.413937	0.755429	1
XIC	c952.a1	GRMZM2G025322_P01	Zm00001d037273	moderately similar to ( 242) AT1G53670 | Symbols: MSRB1, ATMSRB1 | MSRB1 (methionine sulfoxide reductase B 1); peptide-methionine-(S)-S-oxide reductase | chr1:20036687-20038074 FORWARDmoderately similar to ( 258) loc_os06g27760 12006.m32078 protein peptide methionine sulfoxide reductase msrB, putative, expressed seq=cds; coord=6:115076681..115080561:1; parent_gene=GRMZM2G025322	Transcription	2.38696	3.68922	0	0	0	0	0.374695	0.887524
XIC	c449.a1	GRMZM2G450233_P01	Zm00001d037550	moderately similar to ( 283) AT1G05260 | Symbols: RCI3, RCI3A | RCI3 (RARE COLD INDUCIBLE GENE 3); peroxidase | chr1:1529827-1531271 FORWARDmoderately similar to ( 266) PER1_ORYSA Peroxidase 1 precursor (EC 1.11.1.7) - Oryza sativa (Rice)moderately similar to ( 459) loc_os05g06970 12005.m05223 protein peroxidase 1 precursor, putative, expressed seq=cds; coord=6:125154676..125157008:1; parent_gene…	Carbohydrate metabolism	2.36744	13.9195	1.25566e-12	2.08119e-12	0	0	0.413899	0.928761
SC	b88.a1	GRMZM2G080107_P01	Zm00001d041819	weakly similar to ( 161) AT5G64040 | Symbols: PSAN | PSAN; calmodulin binding | chr5:25628690-25629409 REVERSEweakly similar to ( 186) PSAN_MAIZE Photosystem I reaction center subunit N, chloroplast precursor (PSI-N) (Fragment) - Zea mays (Maize)weakly similar to ( 182) loc_os12g08770 12012.m04863 protein photosystem I reaction center subunit N, chloroplast precursor, putative, expressed seq=cds;…	Energy metabolism	2.35919	1.88012	0	0	0.992499	0.996182	1	1
XIC	c321.a1	AC202185.4_FGP004	Zm00001d030346	weakly similar to ( 140) loc_os10g07210 12010.m04110 protein hsp20/alpha crystallin family protein, expressed seq=cds; coord=1:122162499..122163689:1; parent_gene=AC202185.4_FG004	Folding, sorting and degradation	2.35745	4.22327	2.76661e-05	3.69076e-05	0	0	0.107337	0.616007
XIC	c374.a1	GRMZM2G030606_P01	Zm00001d017118	moderately similar to ( 202) AT1G67700 | Symbols: | unknown protein | chr1:25374295-25375810 FORWARDmoderately similar to ( 298) loc_os02g38820 12002.m77827 protein expressed protein seq=cds; coord=5:181386821..181388733:-1; parent_gene=GRMZM2G030606	Folding, sorting and degradation	2.35637	5.32784	0	0	0	0	0.902638	1
XIC	d1513.a1	GRMZM2G094712_P01	Zm00001d043382	highly similar to ( 701) AT5G11520 | Symbols: ASP3, YLS4 | ASP3 (ASPARTATE AMINOTRANSFERASE 3); L-aspartate:2-oxoglutarate aminotransferase | chr5:3685257-3687721 REVERSEhighly similar to ( 756) AATC_ORYSA Aspartate aminotransferase, cytoplasmic (EC 2.6.1.1) (Transaminase A) - Oryza sativa (Rice)highly similar to ( 773) loc_os01g55540 12001.m43201 protein aspartate aminotransferase, cytoplasmic, …	AminoAcid metabolism	2.34902	2.92155	0	0	0	0	0.00875454	0.232947
XIC	d1278.a1	GRMZM5G806622_P01	Zm00001d012539	moderately similar to ( 256) AT3G08640 | Symbols: | alphavirus core protein family | chr3:2622992-2624005 FORWARDmoderately similar to ( 318) loc_os01g59740 12001.m12108 protein expressed protein seq=cds; coord=8:171149687..171150978:1; parent_gene=GRMZM5G806622	notassigned	2.3418	2.78756	3.48081e-07	4.97597e-07	0	0	0.00301558	0.136706
XIC	c676.a1	GRMZM2G018484_P01	Zm00001d018358	highly similar to ( 625) AT2G24820 | Symbols: TIC55 | TIC55 (TRANSLOCON AT THE INNER ENVELOPE MEMBRANE OF CHLOROPLASTS 55); 2 iron, 2 sulfur cluster binding / electron carrier/ oxidoreductase | chr2:10575038-10576829 FORWARDweakly similar to ( 128) CAO_ORYSA Chlorophyllide a oxygenase, chloroplast precursor (EC 1.13.12.14) (Chlorophyll a oxygenase) (Chlorophyll b synthase) - Oryza sativa (Rice)hi…	Folding, sorting and degradation	2.33967	6.37173	0	0	0	0	0.024097	0.364133
SC	b28.a5	GRMZM2G443833_P01	NA	NA	NA	2.33614	2.61316	7.57074e-07	1.71013e-06	0.432009	0.544795	0.853982	1
SC	b95.a2	GRMZM2G181151_P01*	Zm00001d036961	highly similar to ( 912) AT4G38510 | Symbols: | vacuolar ATP synthase subunit B, putative / V-ATPase B subunit, putative / vacuolar proton pump B subunit, putative / V-ATPase 57 kDa subunit, putative | chr4:18011155-18014789 REVERSEhighly similar to ( 950) VATB1_HORVU Vacuolar ATP synthase subunit B isoform 1 (EC 3.6.3.14) (V-ATPase B subunit 1) (Vacuolar proton pump B subunit 1) - Hordeum vulgar…	Membrane transport	2.32674	1.58094	0	0	0.163884	0.279688	0.384108	1
XIC	c185.a1	GRMZM2G110504_P01	Zm00001d008397	weakly similar to ( 112) loc_os10g18340 12010.m065241 protein expressed protein seq=cds; coord=8:6919788..6920686:1; parent_gene=GRMZM2G110504	Signaling molecules and interactions	2.32507	3.8262	0	0	0	0	0.295611	0.828263
XIC	c285.a1	GRMZM2G077541_P01*	Zm00001d001881	highly similar to ( 588) AT3G02720 | Symbols: | DJ-1 family protein / protease-related | chr3:586336-588088 FORWARDhighly similar to ( 669) loc_os04g57590 12004.m35512 protein YLS5, putative, expressed seq=cds; coord=2:2326285..2329820:1; parent_gene=GRMZM2G077541	notassigned	2.32002	1.7418	0	0	3.03533e-11	4.85807e-11	0.187002	0.752928
XIC	c291.a1	GRMZM2G064799_P01	Zm00001d018758	nearly identical (1080) AT5G66760 | Symbols: SDH1-1 | SDH1-1; ATP binding / succinate dehydrogenase | chr5:26653776-26657224 FORWARDnearly identical (1108) DHSA_ORYSA Succinate dehydrogenase [ubiquinone] flavoprotein subunit, mitochondrial precursor (EC 1.3.5.1) (FP) (Flavoprotein subunit of complex II) - Oryza sativa (Rice)nearly identical (1108) loc_os07g04240 12007.m04893 protein succinate deh…	Carbohydrate metabolism	2.31934	2.2549	8.13394e-12	1.31186e-11	0	0	0.090472	0.59218
XIC	c426.a1	GRMZM2G144387_P01*	Zm00001d031956	moderately similar to ( 345) AT2G27530 | Symbols: PGY1 | PGY1 (PIGGYBACK1); RNA binding / structural constituent of ribosome | chr2:11763443-11764570 REVERSEmoderately similar to ( 255) RL10A_CHLRE 60S ribosomal protein L10a - Chlamydomonas reinhardtiimoderately similar to ( 376) loc_os08g44380 12008.m26793 protein 60S ribosomal protein L10a-1, putative, expressed seq=cds; coord=1:205090759..2050…	Translation	2.31697	2.39238	0	0	0.955296	0.95758	0.999999	1
XIC	c177.a1	GRMZM2G027875_P01	Zm00001d016373	highly similar to ( 769) AT4G33090 | Symbols: APM1, ATAPM1 | APM1 (AMINOPEPTIDASE M1); aminopeptidase | chr4:15965915-15970418 REVERSEnearly identical (1119) loc_os02g12650 12002.m33362 protein puromycin-sensitive aminopeptidase, putative, expressed seq=cds; coord=5:155951379..155960766:1; parent_gene=GRMZM2G027875	Folding, sorting and degradation	2.31085	1.98414	0	0	0	0	0.202702	0.755247
XIC	c394.a1	GRMZM2G424857_P01	NA	highly similar to ( 753) AT4G37550 | Symbols: | formamidase, putative / formamide amidohydrolase, putative | chr4:17643684-17645249 FORWARDhighly similar to ( 874) loc_os01g55950 12001.m11751 protein acetamidase, putative, expressed seq=cds; coord=8:173066444..173072416:1; parent_gene=GRMZM2G424857	misc	2.31039	3.94962	0.00512964	0.00618704	0	0	0.898085	1
XIC	d1415.a1	GRMZM2G027385_P01*	Zm00001d046357	nearly identical (1004) AT3G13750 | Symbols: BGAL1 | BGAL1 (Beta galactosidase 1); beta-galactosidase/ catalytic/ cation binding / heme binding / peroxidase/ sugar binding | chr3:4511192-4515756 FORWARDnearly identical (1088) BGAL_ASPOF Beta-galactosidase precursor (EC 3.2.1.23) (Lactase) - Asparagus officinalis (Garden asparagus)nearly identical (1257) loc_os06g37560 12006.m08291 protein beta-ga…	Carbohydrate metabolism	2.309	3.41787	0.000112716	0.000147092	0	0	0.0608092	0.539351
XIC	c643.a1	GRMZM2G024315_P01	Zm00001d011363	moderately similar to ( 367) AT1G60690 | Symbols: | aldo/keto reductase family protein | chr1:22349892-22351668 REVERSEmoderately similar to ( 343) A115_TOBAC Auxin-induced protein PCNT115 - Nicotiana tabacum (Common tobacco)highly similar to ( 575) loc_os01g43090 12001.m10572 protein auxin-induced protein PCNT115, putative, expressed seq=cds; coord=8:144270470..144273473:-1; parent_gene=GRMZM2G0…	Chemical structure transformation maps	2.30512	3.7187	0	0	0	0	0.0175361	0.346196
XIC	c798.a1	GRMZM2G382673_P01	Zm00001d045893	weakly similar to ( 134) AT5G42850 | Symbols: | INVOLVED IN: cell redox homeostasis; LOCATED IN: cellular_component unknown; EXPRESSED IN: 22 plant structures; EXPRESSED DURING: 13 growth stages; CONTAINS InterPro DOMAIN/s: Thioredoxin fold (InterPro:IPR012335), Thioredoxin-like fold (InterPro:IPR012336), Protein of unknown function DUF953, thioredoxin-like (InterPro:IPR010357); Has 237 Blast hit…	notassigned	2.29567	4.58164	8.88178e-16	1.56928e-15	0	0	0.466082	0.939841
XIC	c970.a1	GRMZM2G030494_P01	Zm00001d031696	moderately similar to ( 205) AT2G43560 | Symbols: | immunophilin / FKBP-type peptidyl-prolyl cis-trans isomerase family protein | chr2:18073995-18075385 REVERSEmoderately similar to ( 218) loc_os08g42850 12008.m080225 protein FKBP-type peptidyl-prolyl cis-trans isomerase 2, chloroplast precursor, putative, expressed seq=cds; coord=1:196338968..196340855:-1; parent_gene=GRMZM2G030494	Folding, sorting and degradation	2.28874	4.1676	0	0	0	0	0.0284291	0.378425
XIC	c855.a1	GRMZM2G142891_P01	NA	NA	NA	2.28418	22.2797	0	0	0	0	NA	NA
XIC	c273.a1	GRMZM2G077333_P01	Zm00001d042697	moderately similar to ( 273) AT1G44575 | Symbols: NPQ4, PSBS | NPQ4 (NONPHOTOCHEMICAL QUENCHING); chlorophyll binding / xanthophyll binding | chr1:16871768-16872548 FORWARDmoderately similar to ( 286) PSBS_SPIOL Photosystem II 22 kDa protein, chloroplast precursor (CP22) - Spinacia oleracea (Spinach)moderately similar to ( 305) loc_os01g64960 12001.m150788 protein photosystem II 22 kDa protein, c…	Energy metabolism	2.28185	3.65214	1.82077e-14	3.12913e-14	3.90289e-06	5.00493e-06	0.777185	1
XIC	c680.a1	GRMZM2G040209_P01	Zm00001d007048	highly similar to ( 841) AT5G08530 | Symbols: CI51 | CI51 (51 kDa subunit of complex I); 4 iron, 4 sulfur cluster binding / FMN binding / NAD or NADH binding / NADH dehydrogenase (ubiquinone)/ oxidoreductase, acting on NADH or NADPH | chr5:2759848-2761726 REVERSEhighly similar to ( 891) loc_os07g45090 12007.m079768 protein NADH-ubiquinone oxidoreductase 51 kDa subunit, mitochondrial precursor, pu…	Energy metabolism	2.27849	1.90888	0.252352	0.26949	0.000584471	0.000682063	0.834552	1
XIC	d1049.a1	GRMZM2G068963_P01	Zm00001d013455	moderately similar to ( 244) AT1G18170 | Symbols: | immunophilin / FKBP-type peptidyl-prolyl cis-trans isomerase family protein | chr1:6254291-6255507 FORWARDmoderately similar to ( 329) loc_os03g50080 12003.m10003 protein FK506 binding protein, putative, expressed seq=cds; coord=5:11689704..11690888:1; parent_gene=GRMZM2G068963	Folding, sorting and degradation	2.2766	3.56178	0	0	0	0	0.756625	1
XIC	c986.a1	GRMZM2G105991_P01	Zm00001d041374	moderately similar to ( 303) AT3G16520 | Symbols: UGT88A1 | UDP-glucoronosyl/UDP-glucosyl transferase family protein | chr3:5618847-5620833 REVERSEweakly similar to ( 153) UFO3_MAIZE Anthocyanidin 3-O-glucosyltransferase (EC 2.4.1.115) (Flavonol 3-O-glucosyltransferase) (UDP-glucose flavonoid 3-O-glucosyltransferase) (Bronze-1) (Bz-W22 allele) - Zea mays (Maize)moderately similar to ( 466) loc_os…	Carbohydrate metabolism	2.27039	2.71148	0	0	0	0	0.0470201	0.491906
XIC	b21.a3	GRMZM2G071630_P01*	Zm00001d051001	highly similar to ( 561) AT1G13440 | Symbols: GAPC-2, GAPC2 | GAPC2 (GLYCERALDEHYDE-3-PHOSPHATE DEHYDROGENASE C2); NAD or NADH binding / binding / catalytic/ glyceraldehyde-3-phosphate dehydrogenase (phosphorylating)/ glyceraldehyde-3-phosphate dehydrogenase | chr1:4608465-4610494 REVERSEhighly similar to ( 641) G3PE_MAIZE Glyceraldehyde-3-phosphate dehydrogenase, cytosolic 3 (EC 1.2.1.12) - Zea …	Carbohydrate metabolism	2.26947	2.79244	2.96662e-06	4.0966e-06	1.70525e-11	2.76088e-11	0.910858	1
XIC	c851.a1	GRMZM5G806449_P01*	Zm00001d018454	highly similar to ( 739) AT3G24170 | Symbols: ATGR1 | ATGR1 (glutathione-disulfide reductase); FAD binding / NADP or NADPH binding / glutathione-disulfide reductase/ oxidoreductase | chr3:8729762-8734115 REVERSEhighly similar to ( 897) GSHRC_ORYSA Glutathione reductase, cytosolic (EC 1.8.1.7) (GR) (GRase) - Oryza sativa (Rice)highly similar to ( 897) loc_os02g56850 12002.m100059 protein glutathio…	Metabolism of other amino acids	2.26815	1.89847	0	0	0	0	0.42289	0.928761
XIC	c833.a1	AC217358.3_FGP005	Zm00001d034795	moderately similar to ( 402) AT4G28510 | Symbols: ATPHB1 | ATPHB1 (PROHIBITIN 1) | chr4:14084970-14086372 REVERSEmoderately similar to ( 436) loc_os03g62490 12003.m11125 protein mitochondrial prohibitin complex protein 2, putative, expressed seq=cds; coord=1:296891350..296893628:-1; parent_gene=AC217358.3_FG005	Energy metabolism	2.25804	2.95461	7.06609e-06	9.63071e-06	4.47355e-10	6.805e-10	0.857933	1
XIC	c813.a1	GRMZM2G132886_P01	NA	NA	NA	2.25095	2.62752	0.00111797	0.00138562	0	0	0.453658	0.939841
XIC	c921.a1	GRMZM2G154725_P01	Zm00001d025845	very weakly similar to (81.3) AT4G13200 | Symbols: | unknown protein | chr4:7668292-7669166 REVERSEweakly similar to ( 124) loc_os04g43350 12004.m09298 protein expressed protein seq=cds; coord=10:130282154..130283913:1; parent_gene=GRMZM2G154725	notassigned	2.25032	2.77558	1.28419e-10	2.01687e-10	0	0	0.487307	0.950032
XIC	c307.a1	GRMZM2G146246_P02	Zm00001d042216	moderately similar to ( 212) AT3G62760 | Symbols: ATGSTF13 | ATGSTF13; glutathione transferase | chr3:23217425-23218246 REVERSEmoderately similar to ( 381) GSTF3_MAIZE Glutathione S-transferase III (EC 2.5.1.18) (GST-III) (GST class-phi) - Zea mays (Maize)moderately similar to ( 318) loc_os01g70770 12001.m13122 protein glutathione S-transferase III, putative, expressed seq=cds; coord=3:154973863.…	misc	2.24334	2.39777	0	0	3.33067e-16	6.57768e-16	0.0934153	0.601791
SC	b38.a3	GRMZM2G015989_P01*	NA	highly similar to ( 882) AT3G13470 | Symbols: | chaperonin, putative | chr3:4389685-4392624 FORWARDhighly similar to ( 900) RUBB_PEA RuBisCO large subunit-binding protein subunit beta, chloroplast precursor (60 kDa chaperonin subunit beta) (CPN-60 beta) - Pisum sativum (Garden pea)highly similar to ( 994) loc_os02g01280 12002.m05478 protein ruBisCO large subunit-binding protein subunit beta, chlo…	Folding, sorting and degradation	2.239	1.86148	0	0	0.0250467	0.0650821	0.456555	1
XIC	c338.a1	GRMZM2G114954_P01*	Zm00001d010128	weakly similar to ( 116) RLA2B_MAIZE 60S acidic ribosomal protein P2B - Zea mays (Maize)very weakly similar to (95.1) loc_os05g37330 12005.m07913 protein 60S acidic ribosomal protein P2B, putative, expressed seq=cds; coord=8:98594898..98598231:-1; parent_gene=GRMZM2G114954	Translation	2.23714	2.4006	0.0107738	0.0126668	3.03765e-07	4.09578e-07	0.894866	1
XIC	b10.a4	GRMZM2G094165_P02*	Zm00001d011454	moderately similar to ( 243) AT5G14740 | Symbols: CA2, CA18, BETA CA2 | CA2 (CARBONIC ANHYDRASE 2); carbonate dehydratase/ zinc ion binding | chr5:4758257-4762315 FORWARDmoderately similar to ( 337) CAHC_HORVU Carbonic anhydrase, chloroplast precursor (EC 4.2.1.1) (Carbonate dehydratase) - Hordeum vulgare (Barley)moderately similar to ( 340) loc_os01g45274 12001.m150428 protein carbonic anhydrase…	Energy metabolism	2.23618	3.32954	0	0	0	0	0.00126869	0.0764681
SC	b59.a4	GRMZM2G065448_P01	NA	NA	NA	2.22744	2.36821	2.73176e-10	8.25634e-10	0.0395179	0.0902075	0.32646	1
XIC	d1324.a1	GRMZM2G065073_P02	Zm00001d003446	highly similar to ( 615) AT4G39640 | Symbols: GGT1 | GGT1 (GAMMA-GLUTAMYL TRANSPEPTIDASE 1); gamma-glutamyltransferase/ glutathione gamma-glutamylcysteinyltransferase | chr4:18400608-18402861 FORWARDhighly similar to ( 801) loc_os04g38450 12004.m08835 protein gamma-glutamyltranspeptidase 1 precursor, putative, expressed seq=cds; coord=2:42784980..42792494:1; parent_gene=GRMZM2G065073	Metabolism of other amino acids	2.22193	4.23851	2.88658e-15	5.01563e-15	0	0	0.799926	1
XIC	c816.a1	GRMZM2G174481_P01	Zm00001d053932	highly similar to ( 513) AT2G21250 | Symbols: | mannose 6-phosphate reductase (NADPH-dependent), putative | chr2:9103408-9105116 REVERSEmoderately similar to ( 424) S6PD_MALDO NADP-dependent D-sorbitol-6-phosphate dehydrogenase (EC 1.1.1.200) (Aldose-6-phosphate reductase [NADPH]) (NADP-S6PDH) - Malus domestica (Apple) (Malus sylvestris)highly similar to ( 546) loc_os02g03100 12002.m05660 protein…	Carbohydrate metabolism	2.22002	3.00961	0	0	0	0	0.452596	0.939841
XIC	d1105.a1	GRMZM2G475293_P01*	Zm00001d045565	moderately similar to ( 273) AT2G38740 | Symbols: | haloacid dehalogenase-like hydrolase family protein | chr2:16194639-16195995 REVERSEmoderately similar to ( 416) loc_os09g24230 12009.m05579 protein catalytic/ hydrolase, putative, expressed seq=cds; coord=9:26817670..26820021:1; parent_gene=GRMZM2G475293	notassigned	2.21788	2.31525	8.21725e-11	1.29703e-10	7.95053e-12	1.30231e-11	0.733231	1
XIC	b31.b11	GRMZM2G126010_P01*	Zm00001d010159	highly similar to ( 714) AT5G09810 | Symbols: ACT2, ACT7 | ACT7 (ACTIN 7); structural constituent of cytoskeleton | chr5:3052809-3054220 FORWARDhighly similar to ( 742) ACT1_MAIZE Actin-1 - Zea mays (Maize)highly similar to ( 753) loc_os05g36290 12005.m27847 protein actin-1, putative, expressed seq=cds; coord=8:100394854..100398658:-1; parent_gene=GRMZM2G126010	Cell motility	2.21387	2.89628	0.000792891	0.000993483	0	0	0.459181	0.939841
XIC	c817.a1	GRMZM2G079777_P01*	Zm00001d024242	moderately similar to ( 381) AT3G58730 | Symbols: | vacuolar ATP synthase subunit D (VATD) / V-ATPase D subunit / vacuolar proton pump D subunit (VATPD) | chr3:21718495-21719280 REVERSEmoderately similar to ( 432) loc_os04g55040 12004.m35212 protein vacuolar ATP synthase subunit D 1, putative, expressed seq=cds; coord=10:60142722..60153688:1; parent_gene=GRMZM2G079777	Membrane transport	2.21293	2.23037	0	0	8.53984e-13	1.48386e-12	0.717356	1
XIC	c131.a1	GRMZM2G113696_P01*	Zm00001d006760	moderately similar to ( 277) AT1G13950 | Symbols: EIF-5A, ELF5A-1, ATELF5A-1, EIF5A | ELF5A-1 (EUKARYOTIC ELONGATION FACTOR 5A-1); translation initiation factor | chr1:4773631-4774668 FORWARDmoderately similar to ( 326) IF5A_MAIZE Eukaryotic translation initiation factor 5A (eIF-5A) (eIF-4D) - Zea mays (Maize)moderately similar to ( 306) loc_os07g40580 12007.m08298 protein eukaryotic translation …	Translation	2.21008	1.92418	0	0	0.0645112	0.0680483	0.216817	0.755247
XIC	b45.a1	GRMZM2G008247_P01	Zm00001d024037	moderately similar to ( 483) AT2G44450 | Symbols: BGLU15 | BGLU15 (BETA GLUCOSIDASE 15); catalytic/ cation binding / hydrolase, hydrolyzing O-glycosyl compounds | chr2:18340966-18343744 FORWARDnearly identical (1009) BGLC_MAIZE Beta-glucosidase, chloroplast precursor (EC 3.2.1.21) (Gentiobiase) (Cellobiase) (Beta-D-glucoside glucohydrolase) - Zea mays (Maize)highly similar to ( 502) loc_os04g3988…	Carbohydrate metabolism	2.20465	4.37588	0	0	0	0	0.0216558	0.349083
SC	c221.a1	GRMZM5G854138_P02	Zm00001d004843	seq=cds; coord=2:139066950..139068044:1; parent_gene=GRMZM5G854138	notassigned	2.2021	2.19807	0	0	0.00089532	0.00412228	0.846043	1
XIC	d1232.a1	GRMZM5G862488_P03*	Zm00001d034777	highly similar to ( 900) AT2G23420 | Symbols: NAPRT2 | NAPRT2 (NICOTINATE PHOSPHORIBOSYLTRANSFERASE 2); nicotinate phosphoribosyltransferase | chr2:9971819-9974909 FORWARDnearly identical (1007) loc_os03g62110 12003.m34955 protein nicotinate phosphoribosyltransferase, putative, expressed seq=cds; coord=1:296562028..296576302:1; parent_gene=GRMZM5G862488	notassigned	2.19335	3.31735	0.984086	0.984869	2.24034e-08	3.18098e-08	0.573101	0.968888
XIC	c299.a1	GRMZM2G051630_P01	Zm00001d037725	moderately similar to ( 471) AT5G19760 | Symbols: | dicarboxylate/tricarboxylate carrier (DTC) | chr5:6679591-6681845 REVERSEhighly similar to ( 526) loc_os05g11780 12005.m05647 protein mitochondrial 2-oxoglutarate/malate carrier protein, putative, expressed seq=cds; coord=6:131159543..131163430:-1; parent_gene=GRMZM2G051630	Membrane transport	2.1886	2.26802	0.0179797	0.0208081	0	0	0.532195	0.95646
XIC	c279.a2	GRMZM2G116282_P02	Zm00001d043625	weakly similar to ( 139) AT4G16830 | Symbols: | nuclear RNA-binding protein (RGGA) | chr4:9470652-9472308 FORWARDmoderately similar to ( 264) loc_os01g52390 12001.m11413 protein plasminogen activator inhibitor 1 RNA-binding protein, putative, expressed seq=cds; coord=3:202257167..202260653:-1; parent_gene=GRMZM2G116282	Transcription	2.18548	2.97411	7.05103e-13	1.17331e-12	0	0	0.47504	0.940196
XIC	c701.a1	GRMZM2G005771_P01*	Zm00001d014883	moderately similar to ( 285) AT5G16450 | Symbols: | dimethylmenaquinone methyltransferase family protein | chr5:5374357-5375342 FORWARDmoderately similar to ( 328) loc_os01g52460 12001.m11420 protein regulator of ribonuclease activity A, putative, expressed seq=cds; coord=5:65023010..65024952:-1; parent_gene=GRMZM2G005771	Carbohydrate metabolism	2.18112	2.35766	0	0	0	0	0.00388563	0.158534
XIC	b21.a1	GRMZM2G046804_P01	Zm00001d049641	highly similar to ( 550) AT3G04120 | Symbols: GAPC, GAPC-1, GAPC1 | GAPC1 (GLYCERALDEHYDE-3-PHOSPHATE DEHYDROGENASE C SUBUNIT 1); glyceraldehyde-3-phosphate dehydrogenase (phosphorylating)/ glyceraldehyde-3-phosphate dehydrogenase | chr3:1081077-1083131 FORWARDhighly similar to ( 638) G3PC_MAIZE Glyceraldehyde-3-phosphate dehydrogenase, cytosolic 1 (EC 1.2.1.12) - Zea mays (Maize)highly similar t…	Carbohydrate metabolism	2.1787	3.24834	0.00154151	0.0019012	0	0	0.917686	1
XIC	d1085.a1	GRMZM2G167758_P01	Zm00001d011799	moderately similar to ( 234) AT5G04830 | Symbols: | unknown protein | chr5:1402294-1403671 REVERSEmoderately similar to ( 252) loc_os01g73500 12001.m13378 protein expressed protein seq=cds; coord=8:156883955..156885825:1; parent_gene=GRMZM2G167758	notassigned	2.1682	6.02694	0.373308	0.392332	0	0	0.753019	1
XIC	c638.a1	GRMZM2G079908_P01*	Zm00001d024518	weakly similar to ( 119) AT1G31812 | Symbols: ACBP6, ACBP | ACBP6 (acyl-CoA-binding protein 6); acyl-CoA binding / phosphatidylcholine binding | chr1:11411132-11412099 REVERSEweakly similar to ( 139) ACBP_RICCO Acyl-CoA-binding protein (ACBP) - Ricinus communis (Castor bean)weakly similar to ( 149) loc_os03g37960 12003.m08899 protein acyl-CoA-binding protein, putative seq=cds; coord=10:76402669..…	Lipid metabolism	2.16686	2.39674	4.44089e-16	7.95818e-16	8.92397e-13	1.54633e-12	0.0644384	0.5483
XIC	c128.a1	GRMZM2G129246_P02	Zm00001d018810	highly similar to ( 590) AT3G14420 | Symbols: | (S)-2-hydroxy-acid oxidase, peroxisomal, putative / glycolate oxidase, putative / short chain alpha-hydroxy acid oxidase, putative | chr3:4821899-4823899 FORWARDhighly similar to ( 582) GOX_SPIOL Peroxisomal (S)-2-hydroxy-acid oxidase (EC 1.1.3.15) (Glycolate oxidase) (GOX) (Short chain alpha-hydroxy acid oxidase) - Spinacia oleracea (Spinach)highly…	Energy metabolism	2.15054	2.75373	8.57691e-08	1.24737e-07	6.62392e-12	1.09069e-11	0.837444	1
XIC	c210.a1	GRMZM2G441888_P01	Zm00001d031421	moderately similar to ( 274) loc_os08g39430 12008.m07924 protein thylakoid lumenal 19 kDa protein, chloroplast precursor, putative, expressed seq=cds; coord=1:187383447..187384622:-1; parent_gene=GRMZM2G441888	Energy metabolism	2.15042	1.97944	0.0148836	0.017385	9.96924e-06	1.24541e-05	0.198996	0.755247
XIC	c121.a1	GRMZM2G360021_P01	Zm00001d043972	weakly similar to ( 134) AT3G27850 | Symbols: RPL12-C | RPL12-C (ribosomal protein l12-c); structural constituent of ribosome | chr3:10324905-10325468 FORWARDweakly similar to ( 199) RK12_ORYSA 50S ribosomal protein L12, chloroplast precursor (CL12) - Oryza sativa (Rice)weakly similar to ( 199) loc_os01g47330 12001.m10928 protein 50S ribosomal protein L12-1, chloroplast precursor, putative, expre…	Translation	2.1483	1.71593	0.0716102	0.080005	1.13243e-14	2.13903e-14	0.103618	0.616007
XIC	d1478.a1	GRMZM2G044368_P01*	NA	moderately similar to ( 375) AT3G18820 | Symbols: ATRABG3F, ATRAB7B, RAB71, RABG3F, RAB7B | ATRAB7B (ARABIDOPSIS RAB GTPASE HOMOLOG G3F); GTP binding | chr3:6484266-6486005 FORWARDmoderately similar to ( 381) RAB7_GOSHI Ras-related protein Rab7 - Gossypium hirsutum (Upland cotton)moderately similar to ( 420) loc_os05g44050 12005.m08531 protein ras-related protein Rab7, putative, expressed seq=cds…	Signal transduction	2.14447	2.39374	0.0184131	0.0212901	1.17851e-06	1.54917e-06	0.0843534	0.58552
SC	b30.a7	GRMZM2G093944_P01	NA	NA	NA	2.1353	2.22697	1.43728e-09	4.14702e-09	0.0194962	0.0536764	0.662503	1
XIC	b83.a2	GRMZM2G322953_P04*	Zm00001d010172	highly similar to ( 565) AT1G43670 | Symbols: | fructose-1,6-bisphosphatase, putative / D-fructose-1,6-bisphosphate 1-phosphohydrolase, putative / FBPase, putative | chr1:16468184-16470347 FORWARDhighly similar to ( 615) F16P2_SACHY Fructose-1,6-bisphosphatase, cytosolic (EC 3.1.3.11) (D-fructose-1,6-bisphosphate 1-phosphohydrolase) (FBPase) - Saccharum hybrid (Sugarcane)highly similar to ( 629) …	Carbohydrate metabolism	2.13423	3.31994	0.0035781	0.00434484	0	0	0.0695907	0.55311
XIC	c122.a1	GRMZM2G090718_P01	NA	weakly similar to ( 170) AT5G09650 | Symbols: AtPPa6 | AtPPa6 (Arabidopsis thaliana pyrophosphorylase 6); inorganic diphosphatase/ pyrophosphatase | chr5:2991331-2993117 REVERSEweakly similar to ( 137) IPYR1_CHLRE Soluble inorganic pyrophosphatase 1, chloroplast precursor (EC 3.6.1.1) (Pyrophosphate phospho-hydrolase 1) (PPase 1) - Chlamydomonas reinhardtiimoderately similar to ( 209) loc_os02g52…	Nucleotide metabolism	2.12196	1.85178	0.0900383	0.0995327	1.84313e-09	2.72143e-09	0.0870969	0.58552
XIC	c446.a1	GRMZM2G087590_P01	Zm00001d041824	moderately similar to ( 326) AT1G77090 | Symbols: | thylakoid lumenal 29.8 kDa protein | chr1:28960576-28961875 REVERSEmoderately similar to ( 372) loc_os12g08830 12012.m26739 protein tat pathway signal sequence family protein, expressed seq=cds; coord=3:138643946..138645400:-1; parent_gene=GRMZM2G087590	Energy metabolism	2.11873	2.35594	0	0	0	0	0.128325	0.638497
XIC	b92.a1	GRMZM2G399284_P01*	Zm00001d005812	moderately similar to ( 267) AT5G20720 | Symbols: CPN20, CPN10, CHCPN10, ATCPN21, CPN21 | CPN20 (CHAPERONIN 20); calmodulin binding | chr5:7015015-7016354 FORWARDmoderately similar to ( 229) CH10C_SPIOL 20 kDa chaperonin, chloroplast precursor (Protein Cpn21) (Chloroplast protein Cpn10) (Chloroplast chaperonin 10) (Ch-CPN10) - Spinacia oleracea (Spinach)moderately similar to ( 308) loc_os09g26730…	Folding, sorting and degradation	2.11269	3.10554	1.52819e-09	2.34161e-09	0	0	0.944438	1
XIC	d1462.a1	GRMZM2G120302_P01	Zm00001d044916	highly similar to ( 946) AT5G36210 | Symbols: | serine-type peptidase | chr5:14248202-14253272 REVERSEnearly identical (1186) loc_os06g11180 12006.m05835 protein acyl-peptide hydrolase-like, putative, expressed seq=cds; coord=9:7578400..7585814:1; parent_gene=GRMZM2G120302	Folding, sorting and degradation	2.10026	4.49665	0.0484125	0.0547688	0	0	0.915307	1
XIC	c693.a1	GRMZM2G461716_P01	Zm00001d035981	moderately similar to ( 213) AT5G10770 | Symbols: | chloroplast nucleoid DNA-binding protein, putative | chr5:3403331-3405331 REVERSEmoderately similar to ( 441) loc_os06g02780 12006.m05011 protein aspartic proteinase nepenthesin-2 precursor, putative, expressed seq=cds; coord=6:61601766..61603753:-1; parent_gene=GRMZM2G461716	Transcription	2.08888	8.04348	0	0	0	0	0.492941	0.95271
XIC	c758.a1	GRMZM2G406074_P01	Zm00001d026666	moderately similar to ( 257) AT3G10620 | Symbols: ATNUDX26 | ATNUDX26 (ARABIDOPSIS THALIANA NUDIX HYDROLASE HOMOLOG 26); bis(5-adenosyl)-pentaphosphatase/ bis(5-nucleosyl)-tetraphosphatase (asymmetrical) | chr3:3320263-3321565 FORWARDmoderately similar to ( 315) loc_os04g58900 12004.m10770 protein expressed protein seq=cds; coord=10:148849233..148855901:1; parent_gene=GRMZM2G406074	Signal transduction	2.08811	5.92548	0	0	0	0	0.213192	0.755247
XIC	c336.a1	GRMZM5G854533_P01	Zm00001d014718	weakly similar to ( 161) AT4G02530 | Symbols: | chloroplast thylakoid lumen protein | chr4:1112335-1114005 REVERSEmoderately similar to ( 214) loc_os06g49160 12006.m09440 protein thylakoid lumenal 16.5 kDa protein, chloroplast precursor, putative, expressed seq=cds; coord=5:58601382..58602902:1; parent_gene=GRMZM5G854533	notassigned	2.08695	2.88841	5.55112e-16	9.93357e-16	1.95977e-08	2.79206e-08	0.762089	1
XIC	c682.a1	GRMZM2G536644_P01	Zm00001d018413	moderately similar to ( 499) AT1G80030 | Symbols: | DNAJ heat shock protein, putative | chr1:30105398-30108873 REVERSEweakly similar to ( 134) DNJH_CUCSA DnaJ protein homolog (DNAJ-1) - Cucumis sativus (Cucumber)highly similar to ( 647) loc_os02g56040 12002.m10628 protein chaperone protein dnaJ, putative, expressed seq=cds; coord=5:214380793..214391170:-1; parent_gene=GRMZM2G536644	Folding, sorting and degradation	2.08657	3.21778	0.0309943	0.0354785	0	0	0.420184	0.928761
XIC	c636.a1	GRMZM2G035503_P01	Zm00001d018080	highly similar to ( 908) AT1G78060 | Symbols: | glycosyl hydrolase family 3 protein | chr1:29349796-29352868 REVERSEmoderately similar to ( 376) XYNB_PRUPE Putative beta-D-xylosidase (EC 3.2.1.-) (PpAz152) (Fragment) - Prunus persica (Peach)nearly identical (1285) loc_os02g51620 12002.m10194 protein beta-D-xylosidase, putative, expressed seq=cds; coord=5:208090222..208094428:-1; parent_gene=GRMZM…	Carbohydrate metabolism	2.08558	3.59472	0.000485462	0.000615017	0	0	0.349976	0.865562
XIC	c530.a1	GRMZM5G831399_P01	NA	weakly similar to ( 124) ATCG00710 | Symbols: PSBH | Encodes a 8 kD phosphoprotein that is a component of the photosystem II oxygen evolving core. Its exact molecular function has not been determined but it may play a role in mediating electron transfer between the secondary quinone acceptors, QA and QB, associated with the acceptor side of PSII. | chrC:74485-74706 FORWARDweakly similar to ( 144)…	Energy metabolism	2.07961	2.3106	0	0	8.63005e-06	1.08349e-05	0.356265	0.86817
XIC	c143.a1	GRMZM5G855672_P02	Zm00001d011034	moderately similar to ( 295) AT1G75270 | Symbols: DHAR2 | DHAR2 (DEHYDROASCORBATE REDUCTASE 2); glutathione binding / glutathione dehydrogenase (ascorbate) | chr1:28250255-28251237 REVERSEmoderately similar to ( 373) loc_os05g02530 12005.m04789 protein chloride intracellular channel 6, putative, expressed seq=cds; coord=8:133171791..133174888:1; parent_gene=GRMZM5G855672	Metabolism of other amino acids	2.0794	1.70469	0	0	2.23568e-06	2.90546e-06	0.421862	0.928761
XIC	c274.a1	GRMZM2G460406_P01	Zm00001d053223	moderately similar to ( 422) AT4G35000 | Symbols: APX3 | APX3 (ASCORBATE PEROXIDASE 3); L-ascorbate peroxidase | chr4:16665007-16667541 REVERSEmoderately similar to ( 488) APX4_ORYSA Probable L-ascorbate peroxidase 4 (EC 1.11.1.11) (OsAPx04) - Oryza sativa (Rice)moderately similar to ( 488) loc_os08g43560 12008.m26783 protein OsAPx4 - Peroxisomal Ascorbate Peroxidase encoding gene, expressed seq=…	Metabolism of other amino acids	2.0772	2.14607	0	0	0	0	0.865417	1
XIC	c369.a1	GRMZM2G003318_P01*	Zm00001d030074	moderately similar to ( 287) AT2G35490 | Symbols: | plastid-lipid associated protein PAP, putative | chr2:14912309-14913797 REVERSEmoderately similar to ( 377) PAP3_ORYSA Probable plastid-lipid-associated protein 3, chloroplast precursor - Oryza sativa (Rice)moderately similar to ( 377) loc_os10g42500 12010.m07004 protein plastid-lipid associated protein 3, chloroplast precursor, putative, expres…	Cell motility	2.05835	2.12593	0	0	6.21037e-12	1.02798e-11	0.835112	1
XIC	d1193.a1	AC208571.4_FGP001	NA	moderately similar to ( 229) AT1G56500 | Symbols: | haloacid dehalogenase-like hydrolase family protein | chr1:21159775-21167092 FORWARDmoderately similar to ( 349) loc_os03g19760 12003.m35188 protein NHL repeat protein, putative, expressed seq=cds; coord=1:50700350..50712129:1; parent_gene=AC208571.4_FG001	Signaling molecules and interactions	2.0568	2.44144	0.316965	0.335924	5.44564e-13	9.59471e-13	0.347228	0.865562
XIC	c377.a1	GRMZM2G052546_P03*	Zm00001d027309	moderately similar to ( 440) AT3G52180 | Symbols: ATPTPKIS1, DSP4, SEX4 | SEX4 (STARCH-EXCESS 4); polysaccharide binding / protein tyrosine/serine/threonine phosphatase | chr3:19350574-19353459 REVERSEhighly similar to ( 654) loc_os03g01750 12003.m101148 protein protein tyrosine phosphatase, putative, expressed seq=cds; coord=1:2538102..2544683:-1; parent_gene=GRMZM2G052546	Carbohydrate metabolism	2.05219	3.03171	0	0	0	0	0.200171	0.755247
XIC	c225.a1	GRMZM2G448001_P01	Zm00001d012881	highly similar to ( 750) AT1G21680 | Symbols: | FUNCTIONS IN: molecular_function unknown; INVOLVED IN: biological_process unknown; LOCATED IN: plasma membrane, vacuole, plant-type cell wall; EXPRESSED IN: 25 plant structures; EXPRESSED DURING: 13 growth stages; CONTAINS InterPro DOMAIN/s: WD40-like Beta Propeller (InterPro:IPR011659), Six-bladed beta-propeller, TolB-like (InterPro:IPR011042); BES…	notassigned	2.05151	2.95122	0	0	0	0	0.806413	1
XIC	d1072.a1	GRMZM2G048324_P01	Zm00001d029457	highly similar to ( 588) AT1G60420 | Symbols: | DC1 domain-containing protein | chr1:22261978-22264243 FORWARDhighly similar to ( 786) loc_os03g29240 12003.m08198 protein PDI-like protein, putative, expressed seq=cds; coord=1:70424654..70429257:1; parent_gene=GRMZM2G048324	notassigned	2.04912	2.47502	0	0	0	0	0.131227	0.645066
XIC	c598.a1	GRMZM2G358059_P01	Zm00001d019283	highly similar to ( 543) AT1G56340 | Symbols: CRT1 | CRT1 (CALRETICULIN 1); calcium ion binding / unfolded protein binding | chr1:21090022-21092630 REVERSEhighly similar to ( 622) CALR_MAIZE Calreticulin precursor - Zea mays (Maize)highly similar to ( 617) loc_os07g14270 12007.m29118 protein calreticulin precursor, putative, expressed seq=cds; coord=7:24410021..24413947:-1; parent_gene=GRMZM2G358…	Signal transduction	2.04751	1.85621	0	0	5.97116e-11	9.42499e-11	0.264702	0.788889
XIC	c835.a1	GRMZM2G165998_P01*	Zm00001d027756	moderately similar to ( 338) AT4G14710 | Symbols: ATARD2 | acireductone dioxygenase [iron(II)-requiring]/ metal ion binding | chr4:8424943-8426360 REVERSEmoderately similar to ( 409) ARD2_ORYSA 1,2-dihydroxy-3-keto-5-methylthiopentene dioxygenase 2 (EC 1.13.-.-) (Aci-reductone dioxygenase 2) (Submergence-induced protein 2A) - Oryza sativa (Rice)moderately similar to ( 409) loc_os03g06620 12003.m0…	metal handling	2.04643	2.42519	4.93201e-09	7.49332e-09	0	0	0.543786	0.95646
XIC	c367.a1	GRMZM2G015401_P01*	Zm00001d018187	highly similar to ( 520) AT5G14040 | Symbols: | mitochondrial phosphate transporter | chr5:4531059-4532965 REVERSEhighly similar to ( 584) loc_os02g52860 12002.m10316 protein phosphate carrier protein, mitochondrial precursor, putative, expressed seq=cds; coord=5:210169906..210174618:-1; parent_gene=GRMZM2G015401	Membrane transport	2.04622	3.55438	0.678566	0.69571	0	0	0.971035	1
XIC	b34.a1	GRMZM2G129513_P01	Zm00001d031899	highly similar to ( 625) AT5G58330 | Symbols: | malate dehydrogenase (NADP), chloroplast, putative | chr5:23580010-23582287 REVERSEhighly similar to ( 791) MDHP_MAIZE Malate dehydrogenase [NADP], chloroplast precursor (EC 1.1.1.82) (NADP-MDH) - Zea mays (Maize)highly similar to ( 697) loc_os08g44810 12008.m08453 protein malate dehydrogenase 1, chloroplast precursor, putative, expressed seq=cds; c…	Carbohydrate metabolism	2.04309	1.7659	0.029264	0.0335283	4.86023e-06	6.18843e-06	0.404235	0.924829
XIC	c586.a1	GRMZM2G015361_P01*	Zm00001d008295	moderately similar to ( 357) AT5G14670 | Symbols: ATARFA1B | ATARFA1B (ADP-ribosylation factor A1B); GTP binding / phospholipase activator/ protein binding | chr5:4729319-4730495 FORWARDmoderately similar to ( 358) ARF2_ORYSA ADP-ribosylation factor 2 - Oryza sativa (Rice)moderately similar to ( 365) loc_os01g16030 12001.m150547 protein ADP-ribosylation factor, putative, expressed seq=cds; coord=…	Folding, sorting and degradation	2.04061	2.25774	0.00100924	0.00125581	4.10792e-07	5.49762e-07	0.272552	0.798095
SC	b45.a3	GRMZM2G016890_P01	Zm00001d023994	moderately similar to ( 442) AT5G42260 | Symbols: BGLU12 | BGLU12 (BETA GLUCOSIDASE 12); catalytic/ cation binding / hydrolase, hydrolyzing O-glycosyl compounds | chr5:16898712-16900235 FORWARDnearly identical (1131) BGLC_MAIZE Beta-glucosidase, chloroplast precursor (EC 3.2.1.21) (Gentiobiase) (Cellobiase) (Beta-D-glucoside glucohydrolase) - Zea mays (Maize)moderately similar to ( 484) loc_os04g…	Carbohydrate metabolism	2.04047	1.91484	1.38334e-13	5.50284e-13	0.0157167	0.045591	0.491148	1
XIC	c995.a1	GRMZM2G311919_P01*	Zm00001d016144	weakly similar to ( 157) AT1G53520 | Symbols: | chalcone-flavanone isomerase-related | chr1:19976485-19977915 REVERSEmoderately similar to ( 283) loc_os02g21520 12002.m07391 protein chalcone isomerase 3, putative, expressed seq=cds; coord=5:143183424..143198131:-1; parent_gene=GRMZM2G311919	Biosynthesis of other secondary metabolites	2.04039	5.5708	0	0	0	0	0.886584	1
XIC	c883.a1	GRMZM2G150337_P03	Zm00001d054016	moderately similar to ( 225) AT1G20810 | Symbols: | immunophilin / FKBP-type peptidyl-prolyl cis-trans isomerase family protein | chr1:7232025-7233367 FORWARDmoderately similar to ( 299) loc_os02g02550 12002.m05604 protein peptidyl-prolyl cis-trans isomerase, FKBP-type family protein, expressed seq=cds; coord=4:239783229..239789117:-1; parent_gene=GRMZM2G150337	Folding, sorting and degradation	2.03641	3.15707	0	0	0	0	0.771893	1
XIC	c560.a1	GRMZM2G374971_P01	Zm00001d021901	moderately similar to ( 273) AT4G11650 | Symbols: ATOSM34 | ATOSM34 (osmotin 34) | chr4:7025127-7026113 REVERSEmoderately similar to ( 462) ZEAM_MAIZE Zeamatin precursor - Zea mays (Maize)moderately similar to ( 334) loc_os03g46070 12003.m09627 protein protein P21, putative, expressed seq=cds; coord=7:160215143..160216461:-1; parent_gene=GRMZM2G374971	Environmental adaptation	2.03388	4.59788	2.71835e-08	4.04697e-08	0	0	0.20037	0.755247
XIC	c521.a2	GRMZM2G403636_P01	Zm00001d048924	highly similar to ( 716) AT3G58510 | Symbols: | DEAD box RNA helicase, putative (RH11) | chr3:21640608-21643464 FORWARDmoderately similar to ( 327) DB10_NICSY ATP-dependent RNA helicase-like protein DB10 (EC 3.6.1.-) - Nicotiana sylvestris (Wood tobacco)highly similar to ( 798) loc_os11g38670 12011.m07715 protein ATP-dependent RNA helicase ded-1, putative, expressed seq=cds; coord=4:7260920..7265…	Transcription	2.03359	1.53929	0	0	1.46281e-06	1.91291e-06	0.490247	0.95248
SC	b32.a4	GRMZM2G098370_P02	Zm00001d015008	highly similar to ( 776) AT5G17310 | Symbols: | UTP--glucose-1-phosphate uridylyltransferase, putative / UDP-glucose pyrophosphorylase, putative / UGPase, putative | chr5:5696955-5700845 REVERSEhighly similar to ( 776) UGPA_HORVU UTP--glucose-1-phosphate uridylyltransferase (EC 2.7.7.9) (UDP-glucose pyrophosphorylase) (UDPGP) (UGPase) - Hordeum vulgare (Barley)highly similar to ( 858) loc_os02g02…	Carbohydrate metabolism	2.03323	1.79013	2.50211e-05	4.85177e-05	0.0553883	0.119333	0.314802	1
XIC	c862.a1	GRMZM2G107114_P01	Zm00001d025619	moderately similar to ( 365) AT5G40770 | Symbols: ATPHB3 | ATPHB3 (PROHIBITIN 3) | chr5:16315589-16316621 REVERSEmoderately similar to ( 413) loc_os04g38900 12004.m35151 protein prohibitin, putative, expressed seq=cds; coord=10:123188947..123190511:-1; parent_gene=GRMZM2G107114	Energy metabolism	2.03093	2.17789	0.623585	0.641431	9.16358e-10	1.37072e-09	0.985478	1
SC	b59.a2	GRMZM2G137839_P01	Zm00001d028709	moderately similar to ( 434) AT1G07890 | Symbols: APX1, CS1 | APX1 (ascorbate peroxidase 1); L-ascorbate peroxidase | chr1:2438005-2439435 FORWARDmoderately similar to ( 461) APX1_ORYSA L-ascorbate peroxidase 1, cytosolic (EC 1.11.1.11) (APXa) (OsAPx01) - Oryza sativa (Rice)moderately similar to ( 463) loc_os03g17690 12003.m101302 protein OsAPx1 - Cytosolic Ascorbate Peroxidase encoding gene, exp…	Metabolism of other amino acids	2.02942	2.15614	0	0	1.39014e-05	9.70406e-05	0.823472	1
SC	c198.a2	GRMZM5G821637_P04	Zm00001d034865	moderately similar to ( 336) AT4G35450 | Symbols: AKR2, AFT, AKR2A | AKR2 (ANKYRIN REPEAT-CONTAINING PROTEIN 2); protein binding | chr4:16839862-16841759 FORWARDmoderately similar to ( 431) loc_os03g63480 12003.m35537 protein ankyrin repeat domain-containing protein 2, putative, expressed seq=cds; coord=1:298687651..298689984:1; parent_gene=GRMZM5G821637	Transcription	2.02932	1.83139	0.149341	0.181152	0.181721	0.304841	0.306188	1
XIC	c867.a1	GRMZM5G856734_P01	NA	weakly similar to ( 166) AT5G52240 | Symbols: MSBP1, ATMP1, AtMAPR5 | MSBP1 (membrane steroid binding protein 1); steroid binding | chr5:21213121-21214557 FORWARDweakly similar to ( 183) loc_os10g35850 12010.m06403 protein membrane steroid-binding protein 1, putative, expressed seq=cds; coord=1:226175538..226178243:1; parent_gene=GRMZM5G856734	Metabolism of other amino acids	2.02817	2.48156	0.04944	0.0558308	0	0	0.197158	0.755247
XIC	c913.a1	GRMZM2G061830_P02	Zm00001d039656	moderately similar to ( 429) AT5G20080 | Symbols: | NADH-cytochrome b5 reductase, putative | chr5:6782708-6786360 FORWARDweakly similar to ( 167) NIA1_ORYSA Nitrate reductase [NADH] 1 (EC 1.7.1.1) (NR1) - Oryza sativa (Rice)highly similar to ( 543) loc_os01g07910 12001.m07417 protein NADH-cytochrome b5 reductase-like protein, putative, expressed seq=cds; coord=3:11529201..11534274:1; parent_gene=…	Folding, sorting and degradation	2.00965	1.95515	0.140442	0.153364	0	0	0.714476	1
XIC	c875.a1	GRMZM2G073584_P02	Zm00001d041880	nearly identical (1177) AT2G32810 | Symbols: BGAL9 | BGAL9 (Beta galactosidase 9); beta-galactosidase/ catalytic/ cation binding / sugar binding | chr2:13919410-13925325 REVERSEhighly similar to ( 865) BGAL_ASPOF Beta-galactosidase precursor (EC 3.2.1.23) (Lactase) - Asparagus officinalis (Garden asparagus)nearly identical (1563) loc_os12g24170 12012.m06251 protein BGAL9, putative, expressed seq=…	Carbohydrate metabolism	2.00532	2.449	5.08509e-09	7.71657e-09	0	0	0.0202777	0.349083
XIC	c326.a1	GRMZM2G095287_P01	Zm00001d046942	moderately similar to ( 498) AT5G64380 | Symbols: | fructose-1,6-bisphosphatase family protein | chr5:25741342-25743024 FORWARDmoderately similar to ( 271) F16P1_SPIOL Fructose-1,6-bisphosphatase, chloroplast precursor (EC 3.1.3.11) (D-fructose-1,6-bisphosphate 1-phosphohydrolase) (FBPase) - Spinacia oleracea (Spinach)highly similar to ( 573) loc_os06g45370 12006.m09064 protein fructose-1,6-bisph…	Energy metabolism	2.00395	1.80261	6.65268e-07	9.42462e-07	0	0	0.428745	0.928761
XIC	b89.a1	GRMZM2G149751_P01*	Zm00001d031128	nearly identical (1316) AT5G17920 | Symbols: ATCIMS | ATMS1; 5-methyltetrahydropteroyltriglutamate-homocysteine S-methyltransferase/ methionine synthase | chr5:5935771-5939195 FORWARDnearly identical (1328) METE_CATRO 5-methyltetrahydropteroyltriglutamate--homocysteine methyltransferase (EC 2.1.1.14) (Vitamin-B12-independent methionine synthase isozyme) (Cobalamin-independent methionine synthase …	AminoAcid metabolism	1.99968	1.93002	0	0	0	0	0.506711	0.95271
XIC	d1044.a1	GRMZM2G155580_P01*	Zm00001d034630	highly similar to ( 797) AT5G13520 | Symbols: | peptidase M1 family protein | chr5:4342117-4344571 REVERSEnearly identical (1127) loc_os03g60460 12003.m10935 protein leukotriene A-4 hydrolase, putative, expressed seq=cds; coord=1:292988885..292997657:1; parent_gene=GRMZM2G155580	Folding, sorting and degradation	1.99903	1.80202	0.0165986	0.0193343	1.5099e-14	2.83925e-14	0.284808	0.816406
SC	b59.a1	GRMZM2G054300_P01	Zm00001d047757	moderately similar to ( 437) AT1G07890 | Symbols: APX1, CS1 | APX1 (ascorbate peroxidase 1); L-ascorbate peroxidase | chr1:2438005-2439435 FORWARDmoderately similar to ( 468) APX1_ORYSA L-ascorbate peroxidase 1, cytosolic (EC 1.11.1.11) (APXa) (OsAPx01) - Oryza sativa (Rice)moderately similar to ( 470) loc_os03g17690 12003.m101302 protein OsAPx1 - Cytosolic Ascorbate Peroxidase encoding gene, exp…	Metabolism of other amino acids	1.99824	2.11392	0	0	1.1533e-05	8.15602e-05	0.407911	1
XIC	c702.a1	GRMZM2G013461_P01	Zm00001d008268	moderately similar to ( 270) AT3G12490 | Symbols: ATCYSB | cysteine protease inhibitor, putative / cystatin, putative | chr3:3960523-3961777 REVERSEweakly similar to ( 125) CYTI_VIGUN Cysteine proteinase inhibitor (Cystatin) - Vigna unguiculata (Cowpea)moderately similar to ( 359) loc_os01g16430 12001.m08239 protein multidomain cystatin, putative, expressed seq=cds; coord=8:3347680..3350552:1; pa…	Folding, sorting and degradation	1.99766	2.47839	0	0	0	0	0.110028	0.616007
XIC	c362.a2	GRMZM2G164714_P01*	Zm00001d025893	moderately similar to ( 473) AT2G43180 | Symbols: | catalytic | chr2:17953832-17955774 REVERSEweakly similar to ( 177) CPPM_DIACA Putative carboxyvinyl-carboxyphosphonate phosphorylmutase (EC 2.7.8.23) (Carboxyphosphonoenolpyruvate phosphonomutase) (CPEP phosphonomutase) (PSR132) - Dianthus caryophyllus (Carnation) (Clove pink)highly similar to ( 717) loc_os04g42580 12004.m09225 protein carboxyvi…	Carbohydrate metabolism	1.99419	2.49033	0.687769	0.704571	0	0	0.493109	0.95271
XIC	c601.a1	GRMZM2G098423_P01	Zm00001d046923	highly similar to ( 668) AT4G34200 | Symbols: EDA9 | EDA9 (embryo sac development arrest 9); ATP binding | chr4:16374041-16376561 REVERSEvery weakly similar to (89.0) DHGY_CUCSA Glycerate dehydrogenase (EC 1.1.1.29) (NADH-dependent hydroxypyruvate reductase) (HPR) (GDH) - Cucumis sativus (Cucumber)highly similar to ( 773) loc_os06g44460 12006.m08974 protein D-3-phosphoglycerate dehydrogenase, chl…	AminoAcid metabolism	1.98636	2.76347	0	0	0	0	0.351715	0.866196
XIC	c515.a2	GRMZM2G097164_P01	Zm00001d033596	moderately similar to ( 311) AT4G14800 | Symbols: PBD2 | PBD2 (20S PROTEASOME BETA SUBUNIT 2); peptidase/ threonine-type endopeptidase | chr4:8500398-8502058 FORWARDmoderately similar to ( 360) PSB2_ORYSA Proteasome subunit beta type 2 (EC 3.4.25.1) (20S proteasome alpha subunit D) (20S proteasome subunit beta-4) - Oryza sativa (Rice)moderately similar to ( 360) loc_os03g48930 12003.m09894 protei…	Folding, sorting and degradation	1.98549	1.78252	0	0	0.000169924	0.000201664	0.374892	0.887524
XIC	c572.a1	GRMZM5G843368_P01	Zm00001d042017	weakly similar to ( 169) AT1G76760 | Symbols: ATY1, TRX-Y1 | ATY1 (ARABIDOPSIS THIOREDOXIN Y1); electron carrier/ protein disulfide oxidoreductase | chr1:28811873-28812948 REVERSEvery weakly similar to (90.1) TRXM_CHLRE Thioredoxin M-type, chloroplast precursor (TRX-M) (Thioredoxin CH2) - Chlamydomonas reinhardtiimoderately similar to ( 211) loc_os01g73234 12001.m150920 protein thioredoxin-like p…	Folding, sorting and degradation	1.98329	2.52312	0	0	0	0	0.175532	0.738322
XIC	c926.a1	GRMZM2G103812_P01*	Zm00001d042367	highly similar to ( 773) AT4G14030 | Symbols: SBP1 | SBP1 (selenium-binding protein 1); selenium binding | chr4:8098121-8100165 REVERSEhighly similar to ( 917) loc_os01g68770 12001.m12979 protein selenium-binding protein, putative, expressed seq=cds; coord=3:161729199..161732642:-1; parent_gene=GRMZM2G103812	metal handling	1.98301	3.14226	0	0	0	0	0.250147	0.779325
XIC	c152.a1	GRMZM2G312910_P02	Zm00001d018901	moderately similar to ( 360) AT1G55480 | Symbols: | binding / protein binding | chr1:20713822-20715351 FORWARDmoderately similar to ( 421) loc_os07g07540 12007.m28951 protein SHOOT1 protein, putative, expressed seq=cds; coord=7:8465529..8467600:1; parent_gene=GRMZM2G312910	notassigned	1.9814	1.8811	0	0	1.9984e-15	3.87363e-15	0.650663	0.997698
XIC	d1178.a1	GRMZM2G021149_P01*	Zm00001d018882	weakly similar to ( 135) AT4G20440 | Symbols: | smB (small nuclear ribonucleoprotein associated protein B) | chr4:11022843-11023616 REVERSEweakly similar to ( 176) loc_os07g07220 12007.m05181 protein small nuclear ribonucleoprotein-associated protein B, putative, expressed seq=cds; coord=2:233798711..233801595:-1; parent_gene=GRMZM2G022041	Transcription	1.97338	1.94251	1.43465e-11	2.30203e-11	1.75215e-05	2.15887e-05	0.0803542	0.585438
XIC	c824.a1	GRMZM2G005552_P01	Zm00001d011036	moderately similar to ( 447) AT2G28680 | Symbols: | cupin family protein | chr2:12303118-12304747 REVERSEvery weakly similar to (97.8) GLUA2_ORYSA Glutelin type-A 2 precursor (Glutelin type II) [Contains: Glutelin type-A 2 acidic chain; Glutelin type-A 2 basic chain] - Oryza sativa (Rice)highly similar to ( 549) loc_os05g02520 12005.m27675 protein legumin-like protein, putative, expressed seq=cds…	Signaling molecules and interactions	1.96052	2.67398	2.22045e-16	4.01917e-16	0	0	0.697658	1
SC	b50.a2	GRMZM2G003385_P01*	Zm00001d043086	highly similar to ( 955) AT3G08590 | Symbols: | 2,3-biphosphoglycerate-independent phosphoglycerate mutase, putative / phosphoglyceromutase, putative | chr3:2608683-2611237 REVERSEnearly identical (1085) PMGI_MAIZE 2,3-bisphosphoglycerate-independent phosphoglycerate mutase (EC 5.4.2.1) (Phosphoglyceromutase) (BPG-independent PGAM) (PGAM-I) - Zea mays (Maize)nearly identical (1033) loc_os01g60190…	Carbohydrate metabolism	1.95733	2.16178	0.163644	0.196518	4.68453e-05	0.000292986	0.769546	1
XIC	c811.a1	GRMZM2G038848_P01*	Zm00001d033328	highly similar to ( 522) AT2G19940 | Symbols: | N-acetyl-gamma-glutamyl-phosphate reductase/ NAD or NADH binding / binding / catalytic/ oxidoreductase, acting on the aldehyde or oxo group of donors, NAD or NADP as acceptor / protein dimerization | chr2:8613168-8615649 FORWARDhighly similar to ( 680) ARGC_ORYSA Probable N-acetyl-gamma-glutamyl-phosphate reductase, chloroplast precursor (EC 1.2.1.3…	AminoAcid metabolism	1.955	2.35084	0	0	0	0	0.695699	1
XIC	b38.a1	GRMZM2G083716_P01*	Zm00001d045544	highly similar to ( 935) AT3G13470 | Symbols: | chaperonin, putative | chr3:4389685-4392624 FORWARDhighly similar to ( 934) RUBB_PEA RuBisCO large subunit-binding protein subunit beta, chloroplast precursor (60 kDa chaperonin subunit beta) (CPN-60 beta) - Pisum sativum (Garden pea)nearly identical (1036) loc_os06g02380 12006.m31823 protein ruBisCO large subunit-binding protein subunit beta, chlor…	Folding, sorting and degradation	1.95308	2.00668	0.626154	0.643547	3.34608e-08	4.72432e-08	0.414247	0.928761
SC	c371.a1	GRMZM2G053898_P01*	Zm00001d012042	weakly similar to ( 177) AT4G26840 | Symbols: SUM1, SUMO 1, SUMO1, ATSUMO1 | SUMO1 (SMALL UBIQUITIN-LIKE MODIFIER 1); protein binding / protein tag | chr4:13497466-13498458 FORWARDweakly similar to ( 184) SMT3_ORYSA Ubiquitin-like protein SMT3 - Oryza sativa (Rice)weakly similar to ( 184) loc_os01g68950 12001.m42793 protein ubiquitin-like protein SMT3, putative, expressed seq=cds; coord=8:1621718…	Folding, sorting and degradation	1.95226	2.02517	4.78093e-05	9.05949e-05	0.299973	0.428759	0.868682	1
XIC	c627.a1	GRMZM2G156145_P01	Zm00001d026265	nearly identical (1465) AT2G32730 | Symbols: | 26S proteasome regulatory subunit, putative | chr2:13880189-13885464 FORWARDnearly identical (1583) loc_os08g12820 12008.m26623 protein 26S proteasome non-ATPase regulatory subunit 1, putative, expressed seq=cds; coord=10:141573795..141580886:-1; parent_gene=GRMZM2G156145	Folding, sorting and degradation	1.94904	2.40168	0.911475	0.915843	0.000320516	0.000376479	0.0567381	0.534211
XIC	b50.a3	GRMZM2G006791_P01*	Zm00001d016802	moderately similar to ( 466) AT1G77490 | Symbols: TAPX | TAPX (THYLAKOIDAL ASCORBATE PEROXIDASE); L-ascorbate peroxidase | chr1:29117688-29120046 FORWARDhighly similar to ( 571) APX8_ORYSA Probable L-ascorbate peroxidase 8, chloroplast precursor (EC 1.11.1.11) (OsAPx08) - Oryza sativa (Rice)highly similar to ( 571) loc_os02g34810 12002.m08570 protein OsAPx8 - Thylakoid-bound Ascorbate Peroxidase …	Metabolism of other amino acids	1.94894	3.11994	8.01878e-09	1.21538e-08	0	0	0.0598972	0.539351
XIC	d1358.a1	GRMZM2G072091_P01	Zm00001d044813	moderately similar to ( 421) AT1G66430 | Symbols: | pfkB-type carbohydrate kinase family protein | chr1:24778400-24780393 FORWARDmoderately similar to ( 337) SCRK2_MAIZE Fructokinase-2 (EC 2.7.1.4) (ZmFRK2) - Zea mays (Maize)highly similar to ( 530) loc_os06g12600 12006.m05976 protein fructokinase-2, putative, expressed seq=cds; coord=9:3856795..3860954:-1; parent_gene=GRMZM2G072091	Carbohydrate metabolism	1.94736	3.04757	7.08818e-10	1.09679e-09	0	0	0.275385	0.800893
[truncated: 1,218 more rows]

## Sheet: sup. Table S2
Supplemental Table S2. Lists of genotypes ordered by WD/WW ratio for the two proteins shown in Figure 1C.
Protein	Genotype	Abundance in WW	Abundance in WD
GRMZM2G352415	PHG83	1.68917e+07	1.35262e+07
GRMZM2G352415	EZ36	1.79222e+07	1.46631e+07
GRMZM2G352415	EP51	1.79085e+07	1.58383e+07
[truncated: 499 more rows]

## Sheet: sup. Table S3
Supplemental Table S3. Positions of the pQTLs and coQTLs detected in the WW and WD conditions.
[truncated: 22,842 more rows]

[truncated: 13 more sheets: sup. Table S4, sup. Table S5A, sup. Table S5B, sup. Table S5C, sup. Table S5D, sup. Table S6, sup. Table S7, sup. Table S8, sup. Table S9, sup. Table S10, sup. Table S11A, sup. Table S11B, sup. Table S12]
